# Supplementary material for: Systematic review of academic bullying in medical settings: dynamics and consequences
Source: PubMed Central journal article supplement — BMJ Open. 2021 Jul 12;11(7):e043256. doi: 10.1136/bmjopen-2020-043256 (PMC8311313; doi:10.1136/bmjopen-2020-043256), 2021-07-12
Supplement: bmjopen-2020-043256.draft_revisions.pdf [file bmjopen-2020-043256.draft_revisions.pdf]

# BMJ Open

BMJ Open is committed to open peer review. As part of this commitment we make the peer review history of every article we publish publicly available.

When an article is published we post the peer reviewers' comments and the authors' responses online. We also post the versions of the paper that were used during peer review. These are the versions that the peer review comments apply to.

The versions of the paper that follow are the versions that were submitted during the peer review process. They are not the versions of record or the final published versions. They should not be cited or distributed as the published version of this manuscript.

BMJ Open is an open access journal and the full, final, typeset and author-corrected version of record of the manuscript is available on our site with no access controls, subscription charges or pay-per-view fees (<http://bmjopen.bmj.com>).

If you have any questions on BMJ Open's open peer review process please email [info.bmjopen@bmj.com](mailto:info.bmjopen@bmj.com)

# BMJ Open

## **A systematic review of academic bullying in medicine: behaviours, perpetrators, victims, and consequences**

|                               |                                                                                                                                                                                                                                      |
|-------------------------------|--------------------------------------------------------------------------------------------------------------------------------------------------------------------------------------------------------------------------------------|
| Journal:                      | <i>BMJ Open</i>                                                                                                                                                                                                                      |
| Manuscript ID                 | bmjopen-2020-043256                                                                                                                                                                                                                  |
| Article Type:                 | Original research                                                                                                                                                                                                                    |
| Date Submitted by the Author: | 29-Jul-2020                                                                                                                                                                                                                          |
| Complete List of Authors:     | Averbuch, Tauben; McMaster University, Medicine<br>Eliya, Yousif; McMaster University, Health Research Methodology<br>Van Spall, Harriette Gillian Christine; Population Health Research<br>Institute; McMaster University, Medicine |
| Keywords:                     | MEDICAL EDUCATION & TRAINING, GENERAL MEDICINE (see Internal<br>Medicine), HEALTH SERVICES ADMINISTRATION & MANAGEMENT                                                                                                               |
|                               |                                                                                                                                                                                                                                      |

SCHOLARONE™  
Manuscripts



I, the Submitting Author has the right to grant and does grant on behalf of all authors of the Work (as defined in the below author licence), an exclusive licence and/or a non-exclusive licence for contributions from authors who are: i) UK Crown employees; ii) where BMJ has agreed a CC-BY licence shall apply, and/or iii) in accordance with the terms applicable for US Federal Government officers or employees acting as part of their official duties; on a worldwide, perpetual, irrevocable, royalty-free basis to BMJ Publishing Group Ltd ("BMJ") its licensees and where the relevant Journal is co-owned by BMJ to the co-owners of the Journal, to publish the Work in this journal and any other BMJ products and to exploit all rights, as set out in our [licence](#).

The Submitting Author accepts and understands that any supply made under these terms is made by BMJ to the Submitting Author unless you are acting as an employee on behalf of your employer or a postgraduate student of an affiliated institution which is paying any applicable article publishing charge ("APC") for Open Access articles. Where the Submitting Author wishes to make the Work available on an Open Access basis (and intends to pay the relevant APC), the terms of reuse of such Open Access shall be governed by a Creative Commons licence – details of these licences and which [Creative Commons](#) licence will apply to this Work are set out in our licence referred to above.

Other than as permitted in any relevant BMJ Author's Self Archiving Policies, I confirm this Work has not been accepted for publication elsewhere, is not being considered for publication elsewhere and does not duplicate material already published. I confirm all authors consent to publication of this Work and authorise the granting of this licence.

1  
2  
3 **A systematic review of academic bullying in medicine: behaviours, perpetrators, victims, and consequences**  
4

5 Averbuch T<sup>a</sup>, Yousif E<sup>b</sup>, Van Spall HGC<sup>a, b, c</sup>  
6

7  
8 **Corresponding author:** Harriette Gillian Christine Van Spall. Harriette.vanspall@phri.ca. 237 Barton Street East, Hamilton, ON L8L  
9  
10 2X2, Canada. Telephone: 905-521-2100 Ext: 40601 Fax: 905-538-8932  
11

12 <sup>a</sup>Department of Medicine, McMaster University, Hamilton, Ontario; <sup>b</sup>Department of Health Research Methods, Evidence, and Impact,  
13  
14 McMaster University, Hamilton, Ontario; <sup>c</sup>Population Health Research Institute, Hamilton, Ontario  
15

16  
17 **Word count: 3993**  
18  
19  
20  
21  
22  
23  
24  
25  
26  
27  
28  
29  
30  
31  
32  
33  
34  
35  
36  
37  
38  
39  
40  
41  
42

43 1  
44  
45  
46  
47

## ABSTRACT

**Objective:** To characterize academic bullying behaviours, perpetrators, victims, and interventions.

**Design:** Systematic review.

**Data sources:** We searched EMBASE and PsycINFO for articles published between January 1, 1999 and June 24, 2018.

**Study selection:** We included prospective studies conducted in academic settings in which victims were either consultants or trainees, and described: the method or impact of bullying; perpetrators or victims; and/or interventions. Study characteristics, quality, and data were assessed independently by 2 reviewers.

**Results:** We included 44 studies representing 36,262 consultants and trainees. We defined academic bullying as the abuse of authority in an academic setting through punishing behaviours that include overwork, destabilization, and isolation. Of 25,639 individuals (in 19 studies) who responded about bullying patterns, the most common (38.2% of respondents) was overwork. Of 9,181 individuals (20 studies) who reported the impact, the most common was psychologic distress (40.4%). Among bullies identified by 11,006 individuals (16 studies), consultants (55.1%) were most common. Of 6,923 victims who reported gender (17 studies), the majority were women (52.3%). Among 6,930 victims (in 15 studies) who described their response, 32.8% filed a report and most (52.3%) did not perceive a positive outcome. In the 7 before-after studies, anti-bullying committees (1 study) were associated with improvements.

**Conclusions:** Academic bullying commonly involves overwork, and is perceived as having a negative impact on well-being. Perpetrators were commonly male consultants and victims were commonly women. Only a minority of victims filed a report. Methodologically robust trials of anti-bullying interventions are needed.

1  
2  
3 **Limitations:** Most studies (27/44) had at least a moderate risk of bias. All interventions were uncontrolled before-after studies.  
4

5 **Keywords:** Medical Education & Training, General Medicine, Health Services Administration & Management  
6  
7

### 8 9 10 **Strengths and limitations**

- 11 • This review is comprehensive, including 44 articles with 36,262 consultants and trainees, across several countries and  
12 including all levels of training.  
13
- 14 • We explicitly defined inclusion criteria, and used established tools to assess the risk of bias of included studies  
15
- 16 • The major limitations of the included studies include differing definitions of bullying and inappropriate sampling methods for  
17 survey studies, and a lack of a control group or appropriate statistical analysis for interventions  
18  
19  
20  
21  
22  
23  
24  
25  
26  
27  
28  
29  
30  
31  
32  
33  
34  
35  
36  
37  
38  
39  
40  
41  
42

## Background

Bullying behaviours have been described as repeated attempts to discredit, destabilize, or instill fear in an intended target<sup>1</sup>. Bullying can take many forms from overt abuse to subtle acts that erode the confidence, reputation, and progress of the victim<sup>2</sup>. Bullying is common in medicine, likely impacting mental health, professional interactions, and career advancement<sup>3-6</sup>. It may also impact a physician's ability to care for patients. Surveys from the National Health Service (NHS) showed that 55% of staff experienced at least one type of bullying; 31% were doctors in training<sup>7</sup>. Bullying is closely related to harassment and discrimination, in which mistreatment is based on personal characteristics or a protected class such as sex or race<sup>8</sup>. Within academic settings, victims may experience all three and the distinction may be less clear.

The hierarchical structure of academic medicine – in which there are power imbalances, subjective criteria for recruitment and career advancement, and siloed departments with few checks in place for toxic behaviours – may offer an operational environment in which bullying may be more widespread than in non-academic medical settings. Academic bullying is a seldom-used term within the literature, but is intended to describe the forms of bullying that may exist in academic settings. The prevalence of academic bullying in medical settings is unknown likely due to a lack of definition of bullying behaviours, a fear of reporting, and insufficient research. There is not much known about the characteristics of perpetrators and victims, and about the impact of bullying on academic productivity, career growth, and patient care. Furthermore, institutional barriers and facilitators of bullying behavior have not been reported, and the effectiveness of interventions in addressing academic bullying have not been evaluated.

1  
2  
3 The purpose of this systematic review is to define and classify patterns of academic bullying; assess the characteristics of  
4 perpetrators and victims; evaluate the impact of bullying on victims; review institutional barriers and facilitators of bullying; and  
5 identify possible solutions.  
6  
7  
8  
9

## 10 11 12 **Methods**

### 13 14 **Data sources and searches**

15  
16 This study follows PRISMA reporting guidelines. Two reviewers searched two online databases (EMBASE and PsycINFO)  
17 for English-language articles published between January 1, 1999, to June 24, 2018 and relevant to academic bullying in medicine. An  
18 outline of the search is provided in Figure 1. A combination of medical subject heading (MeSH), title, and abstract text terms  
19 encompassing “Medicine”; “Bullying“ and “Academia” were used for the full search. The terms of the search are included in  
20 Supplementary figure S1. Two authors independently screened articles for inclusion. Differences were resolved by discussion, and if  
21 necessary, by a third author.  
22  
23  
24  
25  
26  
27  
28  
29  
30  
31  
32

### 33 34 **Study selection**

35 We included prospective studies conducted in academic settings in which victims were either consultants or trainees. Studies  
36 were included if they described: the method and impact of bullying; the characteristics of perpetrators and victims; or interventions  
37 used to address the bullying. We excluded editorials, opinion pieces, reviews, and grey literature. For the purposes of study selection,  
38  
39  
40  
41  
42

43 5



1  
2  
3 academic bullying was defined as mistreatment in academic institutions with the intention or effect of disrupting the academic or  
4  
5 career progress of the victim.  
6  
7

### 8 9 10 **Data extraction and quality assessment**

11  
12 Two reviewers independently extracted data on: study design, setting (academic or non-academic), definition, description and  
13  
14 impact of academic bullying, characteristics of perpetrators and victims, barriers and facilitators of bullying, and interventions and  
15  
16 their outcomes. Two reviewers independently assessed studies for risk of bias. We assessed before-after studies using the National  
17  
18 Heart, Lung, and Blood Institute quality assessment tool<sup>9</sup> and assessed prevalence surveys using the Joanna Briggs Institute critical  
19  
20 appraisal tool<sup>10</sup>. We classified survey studies as low risk of bias if at least 8 of 9 criteria were met, medium risk of bias if 7 of 9 were  
21  
22 met, and high risk of bias if less than 7 were met. We classified before-after studies as low risk of bias if at least 11 of 12 criteria were  
23  
24 met, medium risk of bias if at least 9 of 12 were met, and high risk of bias if less than 9 were met.  
25  
26  
27  
28  
29  
30

### 31 **Data synthesis and analysis**

32  
33 We pooled the results of surveys on the basis of similarity of survey themes to facilitate a descriptive analysis. For survey  
34  
35 studies on the prevalence or impact of bullying, we solely pooled the results of studies that asked respondents about specific bullying  
36  
37 behaviours or impacts, respectively. We then separated results by sex and level of training. Group selection was by consensus between  
38  
39 authors. We presented our results as numbers and percentages. We calculated the denominators from the total number of individuals  
40  
41  
42

43 6

1  
2  
3 who completed surveys on types of bullying behaviours, the impact of bullying, characteristics of bullies and victims, or barriers to  
4 addressing academic bullying. The numerators were calculated from the number of individuals who experienced a specific behaviour  
5 or impact, were bullied by a perpetrator at a specified level of training, or endorsed a specific reason for not making a formal report.  
6  
7 We also reported the number of studies that described each specific bullying behaviour or impact, demographic characteristics of  
8 victims and perpetrators, barriers and facilitators of academic bullying, and specific reasons for not making a formal report. We could  
9 not perform a meta-analysis due to the conceptual heterogeneity between studies.  
10  
11  
12  
13  
14  
15  
16  
17  
18

### 19 **Patient and public involvement**

20 Patients or the public were not involved in the design, conduct, reporting, or dissemination plans of our research.  
21  
22  
23  
24  
25

## 26 **Results**

### 27 **Screening results**

28 We identified 933 unique articles, 44 of which met inclusion criteria. Reasons for exclusion are described in Figure 1.  
29  
30  
31  
32  
33  
34

### 35 **Characteristics of included studies**

36 Studies were most frequently set in the USA (reported in 13 studies)<sup>3,11-21</sup> and the UK (reported in 5 studies)<sup>7,22-25</sup> and were set  
37 in academic hospitals (reported in 36 studies)<sup>1,3-5,11-15,17-19,21-44</sup> or in both teaching and non-teaching sites (reported in 8  
38  
39  
40  
41  
42  
43  
44  
45  
46  
47

1  
2  
3 studies)<sup>7,16,20,45–48</sup>. Sixteen studies included medical students<sup>3–5,11,13–15,17,19,29,31,34,38–41</sup>, 12 included residents or fellows<sup>1,12,24,25,30–</sup>  
4  
5  
6 33,35,36,42,43 and 17 included consultants<sup>6,7,16,18,20–23,27,28,32,37,44–48</sup> (Table 1).  
7  
8  
9

### 10 **Definition of academic bullying**

11  
12 Four papers provided definitions for academic bullying<sup>29,31,36,39</sup>. Common themes included behaviours where the perpetrator  
13  
14 abuses authority to punish the victim through isolation, blocked career advancement, and threats to academic standing. We defined  
15  
16 academic bullying as the abuse of authority by a perpetrator who targets the victim in an academic setting through punishing  
17  
18 behaviours that include overwork, destabilization, and isolation. Multiple studies used the complete or partial Negative Acts  
19  
20 Questionnaire (NAQ), a standardized list of bullying behaviours (reviewed in 22 studies)<sup>1,3,4,6,11–14,16,26,28–31,33–35,38,41,42,46,48</sup>.  
21  
22  
23  
24  
25

### 26 **Patterns of academic bullying behaviours**

27  
28 There were 25,639 consultant and trainee respondents to surveys of bullying behaviours (reported in 19 studies), but not all  
29  
30 were offered the same options to select from (Table 2). Bullying behaviours were grouped into destabilization (reported in 13 studies),  
31  
32 threats to professional status (reported in 15 studies), overwork (reported in 7 studies), and isolation (reported in 13 studies). Undue  
33  
34 pressure to produce work was commonly reported (38.2% of respondents affected, reported in 7 studies)<sup>12,16,25,26,28,30,48</sup>. Of the 13  
35  
36 studies that described destabilization, common methods included being ordered to work below one's competency level (35.7%,  
37  
38 reported in 9 studies)<sup>16,25,28–30,32,34,37,48</sup> and withholding information that affects performance (29.1%; reported in 7 studies)<sup>12,16,26,28–</sup>  
39  
40  
41  
42  
43  
44  
45  
46  
47

8

1  
2  
3 30,48. Of the 15 studies that described threats to professional status, common methods were excessive monitoring (28.8%; reported in 6  
4 studies)<sup>12,16,26,28,30,48</sup> and criticism (24.9%; reported in 10 studies)<sup>12,16,25,26,28,30,32,34,37,48</sup>. Of the 13 studies that described isolation, the  
5  
6 most common method was social and professional exclusion (26.9%; reported in 13 studies)<sup>4,12,14,16,20,26,28–30,32,34,45,48</sup>.  
7  
8  
9

10  
11  
12 There were 3,564 consultant and trainee respondents to surveys that separated the prevalence of bullying behaviours by sex  
13 (reported in 6 studies). A greater proportion of men experienced the intimidatory use of discipline procedures (18.5%, reported in 5  
14 studies)<sup>12,16,29,34,38</sup> while a greater proportion of women experienced all other bullying behaviours (reported in 6 studies)<sup>12,16,20,29,34,38</sup>  
15 (Table 2). There were 24,876 respondents to surveys that analyzed results by level of training (reported in 17 studies) (Supplementary  
16 table S1). A greater proportion of consultants experienced refusal of applications for leave, training, or promotion (25.7%, reported in  
17 2 studies)<sup>16,28</sup> and removal of areas of responsibility (27.8%, reported in 2 studies)<sup>16,28</sup> than residents (11.7%, reported in 2 studies;  
18 10.7%, reported in 3 studies, respectively)<sup>12,26,35</sup> or medical students (not reported; 19.6%, reported in 1 study, respectively)<sup>14</sup>.  
19 Compared to medical students (4.2%, reported in 5 studies)<sup>11,13,14,34,38</sup> and consultants (3.4%, reported in 2 studies)<sup>16,37</sup>, a greater  
20 proportion of residents experienced the intimidatory use of discipline procedures (21.1%, reported in 4 studies)<sup>12,26,29,35</sup>. A greater  
21 proportion of medical students experienced persistent criticism (71.4%, reported in 1 study)<sup>34</sup> than residents (26.3%, reported in 4  
22 studies)<sup>12,25,26,32</sup> and consultants (20.8%, reported in 3 studies)<sup>16,28,37</sup>.  
23  
24  
25  
26  
27  
28  
29  
30  
31  
32  
33  
34  
35  
36  
37  
38  
39

#### 40 **Characteristics of bullies**

41  
42  
43 9  
44  
45  
46  
47

1  
2  
3 Twenty-two studies representing 11,006 consultants and trainees described the characteristics of bullies, although not all were  
4 offered the same options to select from. Common perpetrators included consultants (55.9%, reported in 22  
5 studies)<sup>1,3,4,6,7,12,13,17,20,23,25,26,28–30,32,34,36,41,43,46,47</sup>, residents (21.6%, reported in 14 studies)<sup>1,3,6,7,13,17,25,26,29,30,36,41,43</sup>, and nurses (14.3%,  
6 reported in 14 studies)<sup>1,3,4,12,13,17,25,26,29,30,36,41,43,46</sup>. Of the 4,277 individuals who identified the gender of their bullies, most reported  
7 primarily male (67.2%, reported in 5 studies)<sup>7,16,23,28,32</sup>, followed by primarily female (26.1%, reported in 5 studies)<sup>7,16,23,28,32</sup>, and both  
8 (6.7%, reported in 3 studies)<sup>7,23,28</sup>. Among 5,444 medical students, perpetrators were commonly consultants (45.2%, reported in 6  
9 studies)<sup>3,4,13,17,34,41</sup>, residents (37.6%, reported in 4 studies)<sup>3,13,17,41</sup>, nurses (12.8%, reported in 5 studies)<sup>3,4,13,17,41</sup>, and other medical  
10 students (4.4%, reported in 3 studies)<sup>3,4,34</sup>. Among 2,980 residents, perpetrators were commonly consultants (51.0%, reported in 8  
11 studies)<sup>1,12,25,26,29,30,36,43</sup>, nurses (29.2%, reported in 8 studies)<sup>1,12,25,26,29,30,36,43</sup>, and other residents (16.4%, reported in 8  
12 studies)<sup>1,12,25,26,29,30,36,43</sup>. Of the 1,500 consultants, perpetrators were their peers (39.2%, reported in 7 studies)<sup>6,7,20,28,30,46,47</sup>, senior  
13 consultants (23.7%, reported in 5 studies)<sup>6,7,20,23,46</sup>, and administration (17.7%, reported in 4 studies)<sup>23,28,30,47</sup>.

14  
15  
16  
17  
18  
19  
20  
21  
22  
23  
24  
25  
26  
27  
28  
29  
30  
31 Six studies representing 1,258 interns and medical students described the prevalence of academic bullying according to the  
32 specialty rotation of the learner. Academic bullying was common in surgery (34.9% of respondents, reported in 5 studies)<sup>1,11,29,32,36,41</sup>,  
33 obstetrics and gynecology (25.5%, reported in 2 studies)<sup>11,41</sup> and internal medicine (21.4%, reported in 5 studies)<sup>1,11,29,32,36,41</sup>.

### 34 35 36 37 38 39 40 **Characteristics of victims**

41  
42  
43 10

1  
2  
3 Twenty-five studies described the characteristics of victims, and 19 included the proportion of those who experienced bullying.  
4  
5 Of the 6,689 women and 9,162 men who responded to surveys that analyzed results by sex, women were more likely to report being  
6  
7 bullied than men (54.1% of all women compared to 36.1% of all men, reported in 17 studies)<sup>3,4,12,16,18,21,28–36,38,43</sup>. There were 8,454  
8  
9 consultant and trainee respondents to surveys that separated the results by demographic characteristics other than sex, but not all  
10  
11 characteristics were captured by each study. A greater proportion of international graduates / non-citizens experienced bullying than  
12  
13 citizens (55.2% compared to 50.6%, reported in 3 studies)<sup>12,25,32</sup>, and a greater proportion of overweight participants (BMI >25)  
14  
15 experienced bullying than those with a BMI ≤25 (17.8% compared to 11.8%, reported in 1 study)<sup>33</sup>. The relationship between age and  
16  
17 bullying varied based on the cutoff used and the survey sample in each study. Among consultants, a greater proportion of those with  
18  
19 full professorship experienced bullying than assistant professors (68.0% compared to 51.9%, reported in 1 study)<sup>21</sup>.  
20  
21  
22  
23  
24  
25

### 26 **Impact of academic bullying**

27  
28 There were 9,181 consultant and trainee respondents to surveys on the psychological (reported in 12 studies) and career impact  
29  
30 (reported in 16 studies) of academic bullying (Table 3), although not all were offered the same options to select from. Respondents  
31  
32 commonly reported psychiatric distress (40.4%; reported in 9 studies)<sup>6,23,28,34,36,37,40,43,46</sup>, considerations of quitting (37.8%; reported in  
33  
34 5 studies)<sup>23,28,32,45,47</sup>, and reduced clinical ability (29.3%; reported in 5 studies)<sup>25,28,34,36,40</sup>. No studies quantified the effect on patient  
35  
36 safety. Five studies representing 2,688 individuals described the impact of bullying separated by sex (Table 3). A greater proportion of  
37  
38  
39  
40  
41  
42

1  
2  
3 women experienced loss of career opportunities (23.4%, reported in 5 studies)<sup>16,18,20,21,34</sup> while a greater proportion of men  
4  
5 experienced decreased confidence (32.1%, reported in 2 studies)<sup>21,34</sup> and clinical ability (26.1%, reported in 1)<sup>34</sup>.  
6  
7

8  
9  
10 There were 8,545 consultant and trainee respondents to surveys that separated results by level of training (Supplementary table  
11  
12 S2). A greater proportion of medical students experienced psychiatric distress (72.9%, reported in 2 studies)<sup>34,40</sup> and decreased clinical  
13  
14 performance (34.9%, reported in 2 studies)<sup>34,40</sup> than residents (48.2%, reported in 2 studies and 17.2%, reported in 1 study,  
15  
16 respectively)<sup>36,43</sup> and consultants (17.9%, reported in 4 studies and 9.1%, reported in 1 study, respectively)<sup>23,28,37,46</sup>. A greater  
17  
18 proportion of residents endorsed loss of career opportunities (36.2%, reported in 2 studies)<sup>32,35</sup> compared to medical students (16.0%,  
19  
20 reported in 3 studies)<sup>11,13,34</sup> and consultants (23.7%, reported in 7 studies)<sup>16,18,20,21,28,37,45</sup>.  
21  
22  
23  
24  
25

### 26 **Barriers and facilitators of academic bullying**

27  
28 Eighteen studies pertained to barriers to victims making a formal report (reported in 15 studies) and institutional facilitators  
29  
30 (reported in 14 studies) of academic bullying (Table 4). There were 6,930 consultant and trainee respondents to surveys on their  
31  
32 actions taken in response to bullying and reasons for not making a formal report, although not all were given the same options to select  
33  
34 from. Victims commonly did not make a formal report<sup>1,3,4,13,16,23,26,28,30–32,36,41,43,47</sup>; only 32.8% made a formal report. Deterrents to  
35  
36 reporting included concern regarding career implications (37.7%, reported in 12 studies)<sup>1,4,13,15,28,29,31,32,36,43,45,47</sup>, not knowing who to  
37  
38 report to (31.9%, reported in 9 studies)<sup>1,4,28,29,31,36,43,45,47</sup>, and poor recognition of bullying (13.4%, reported in 7 studies)<sup>5,13,15,17,22,29,36</sup>.  
39  
40  
41  
42

43 12

1  
2  
3 Of the 15 studies, 6 studies representing 1139 individuals reported the outcomes of reporting<sup>1,16,23,28,30,32</sup> although only a small range  
4 of outcomes were offered among options. Submitting a formal report often had no perceived effect on bullying (35.6%, reported in 5  
5 studies);<sup>16,23,28,30,32</sup> a similar proportion of victims endorsed worsening (16.7%, reported in 2)<sup>16,30</sup> and improvement (13.7%, reported  
6 in 5 studies)<sup>1,16,23,30,32</sup> in bullying following reporting.  
7  
8  
9  
10  
11

12  
13  
14 In the 11 studies that described institutional facilitators of bullying, common facilitators were lack of enforcement (reported in  
15 8 studies)<sup>1,16,23,26,28,30,31,36</sup>, the hierarchical structure of medicine (reported in 4 studies)<sup>26,36–38</sup>, normalization of bullying (reported in 4  
16 studies)<sup>3,13,28,43</sup> and lack of a formal reporting process (reported in 2 studies)<sup>4,35</sup>. Individual-level data was not pooled as institutional  
17 facilitators of bullying were most commonly elicited via free-response portions of surveys with varying completion rates.  
18  
19  
20  
21  
22  
23  
24  
25

## 26 **Interventions and outcomes**

27  
28 Thirty-two studies reported strategies to address academic bullying, which included promoting anti-bullying policies (reported  
29 in 13 studies)<sup>2,8,41,46,10,11,17,19,26,28,32,39</sup>, education to prevent academic bullying (reported in 13 studies)<sup>2,3,46,48,4,12,13,20,24,25,28,31</sup>,  
30 establishing an anti-bullying oversight committee (reported in 5 studies)<sup>2,15,17,35</sup>, institutional support for victims (reported in 2  
31 studies)<sup>10,41</sup>, and internal reviews where hospitals develop targeted solutions for their environment (reported in 2 studies)<sup>14,45</sup>  
32  
33 (Supplementary table S3).  
34  
35  
36  
37  
38  
39  
40  
41  
42  
43



1  
2  
3 Of the 32 studies, 7 implemented interventions which included workshops with vignettes to improve recognition of bullying  
4 (reported in 3 studies)<sup>17,22,24</sup>; a gender and power abuse committee that established reporting mechanisms and held mandatory  
5 workshops on mistreatment (reported in 1)<sup>3</sup>; a gender equity office to handle reporting (reported in 1)<sup>19</sup>; zero-tolerance policies  
6 (reported in 1)<sup>44</sup>; and institutional-level tracking of mistreatment to provide targeted staff education (reported in 1)<sup>14</sup>. All 7 studies had  
7 an uncontrolled before-after design, and as such, did not establish causality. In the studies of vignettes, common bullying behaviours  
8 were demonstrated to improve recognition of both subtle and overt acts of bullying. Of the 3 studies that involved bullying recognition  
9 workshops, all reported an associated improvement in bullying recognition. In a study that developed a gender equity office, reporting  
10 was handled through an intermediary; decisions were binding with consequences for retaliation including termination of  
11 employment<sup>19</sup> and 96% of all formal reports were resolved. In a study where a Gender and Power Abuse committee was formed, there  
12 was an associated reduction in academic abuse<sup>3</sup>. In a study assessing the impact of a professionalism retreat about mistreatment for  
13 consultants, there was no reduction in medical student mistreatment<sup>11</sup>. In a study assessing the implementation of zero-tolerance  
14 policies, there was an associated improvement in awareness of bullying reporting processes<sup>44</sup>.

### 33 **Assessment of bias**

34  
35 Seventeen studies had a low risk of bias<sup>4,7,11,16,21,25,28,30–37,46,47</sup>, 15 had a medium risk of bias<sup>1,3,12,13,17,18,20,23,26,27,39,40,42,45,48</sup>, and  
36 12 had a high risk of bias<sup>5,6,14,15,19,22,24,29,38,41,43,44</sup>. Among the 37 survey studies, 13 sampled participants  
37 inappropriately<sup>5,6,12,15,20,26,27,29,38,39,41,43,48</sup>, 12 had inadequate sample sizes or did not justify their sample size<sup>1,5,6,15,20,27,29,31,35,37,38,41</sup>, 5  
38  
39  
40  
41  
42  
43  
44  
45  
46  
47

1  
2  
3 did not sufficiently describe the participants<sup>1,13,15,29,39</sup>, 7 had coverage bias<sup>6,12,20,26,29,38,43</sup>, 3 did not have an appropriate statistical  
4  
5 analysis<sup>13,15,48</sup>, and 2 had a low response rate<sup>1,5,12,13,15,16,23,25,28,30,32,34,36,38,40–43,45,47,48</sup> (Supplementary figure S2). Among the 7 before-  
6  
7 after trials, 1 did not have pre-specified inclusion criteria<sup>24</sup>, 4 had low sample sizes or did not justify their sample size<sup>14,17,22,24</sup>, 2 did  
8  
9 not have clearly defined, pre-specified, consistently measured outcomes<sup>14,24</sup>, 7 did not blind participants<sup>3,14,17,19,22,24,44</sup>, 3 did not  
10  
11 account for loss to follow-up in their analysis<sup>22,24,44</sup>, and 5 lacked statistical tests to assess for significant pre- to post-intervention  
12  
13 changes<sup>14,19,22,24,44</sup> (Supplementary figure S3).  
14  
15  
16  
17  
18

## 19 Discussion

20  
21 In this systematic review, we established a definition for academic bullying, identified common patterns of bullying, and  
22  
23 assessed the impact on victims. We defined academic bullying as the abuse of authority by a perpetrator who targets the victim in an  
24  
25 academic setting through punishing behaviours that include overwork, destabilization, and isolation. Victims reported that academic  
26  
27 bullying often resulted in stalled career advancement and thoughts of leaving the position. A majority of academic bullies were senior  
28  
29 men, and a majority of victims were women. Barriers to reporting academic bullying included fear of reprisal, perceived hopelessness,  
30  
31 and institutional non-enforcement of anti-bullying policies. Strategies to overcome academic bullying, such as anti-bullying  
32  
33 committees and workplace reassignment were associated with an improvement in the prevalence of bullying and resolution of formal  
34  
35 reports.  
36  
37  
38  
39  
40  
41  
42

1  
2  
3 Several factors contribute to the prevalence of bullying within academia. The hierarchical structure lends itself to power  
4 imbalances and prevents victims from speaking out, especially when the aggressor is tenured<sup>51</sup>. The relative isolation of departments  
5 within universities allows poor behaviour to go unchecked. Furthermore, the closed networks within departments lend themselves to  
6 mobbing behaviour and causes victims to fear being blacklisted for speaking out<sup>52</sup>.  
7  
8  
9  
10  
11  
12  
13  
14

15 A lack of clarity around the definition can limit awareness and reporting<sup>31</sup>. The Graduation Questionnaire administered to all  
16 American medical students found that in years where respondents were asked if they had been bullied, the estimated prevalence was  
17 lower than when they were asked about specific bullying behaviours<sup>13</sup>. Surveys on bullying should include a list of defining  
18 behaviours to increase clarity and accuracy in responses<sup>53</sup>. Even in institutions with established reporting systems, respondents were  
19 often unaware of how to file a report<sup>28</sup>. We found that victims of academic bullying rarely filed reports, primarily due to fear of  
20 retaliation. Reporting was not consistently effective and was equally likely to worsen bullying.  
21  
22  
23  
24  
25  
26  
27  
28  
29  
30

31 We found that consultants were the most common sources of bullying at all levels of training, although residents often bullied  
32 medical students. No studies assessed the relative contribution of fellows and senior residents to resident bullying. Among studies that  
33 analyzed bullying among consultants by seniority, senior consultants were a more commonly reported source of bullying<sup>6,7,20,23,46</sup>.  
34 Women and ethnic minorities reported higher rates of bullying among demographic groups surveyed, although racial factors were  
35 infrequently assessed in the surveys included in this study.  
36  
37  
38  
39  
40  
41  
42

1  
2  
3  
4  
5  
6 Our review illustrates the self-reported harms of academic bullying. Victims experienced depressive symptoms, self-perceived  
7  
8 loss of clinical ability, and termination of employment. Academic bullying has been linked to depression<sup>33</sup>, substance abuse<sup>54</sup>, and  
9  
10 hospitalization for coronary artery or cerebrovascular disease<sup>55</sup>. Bullying costs the National Health Service (NHS) of the United  
11  
12 Kingdom £325 million annually due to reduced performance and increased staff turnover<sup>56</sup>. Disruptive behavior, linked to bullying in  
13  
14 the perioperative setting has been linked to 27% of patient deaths, 67% of adverse events, and 71% of medical errors<sup>57</sup>. Reasons for  
15  
16 consultant error include intimidation leading to a fear of communicating sources of harm and slow response times<sup>58</sup> .  
17  
18  
19  
20

21  
22 Anti-bullying committees involving staff and learners can research bullying within their institution and address the most  
23  
24 common disruptive behaviours through targeted interventions<sup>48</sup>. We found that anti-bullying committees typically included three  
25  
26 elements: (1) a multidisciplinary team that includes clinicians and other front-line staff; (2) development of anti-bullying policies and  
27  
28 a reporting process; and (3) an education campaign to promote awareness of policies. Owing to their multifaceted nature, it is  
29  
30 challenging to evaluate the relative contributions of their components. Furthermore, without well-designed trials, the effect of anti-  
31  
32 bullying committees is unknown.  
33  
34  
35  
36  
37

38 The need for a confidential reporting process was raised in the studies included in this review, but few described how  
39  
40 confidentiality could be maintained when the report has to describe details of the bullying that may be only privy to the perpetrator  
41  
42

1  
2  
3 and victim. The reporting process could take the form of the Office of Gender Equity at the University of California, where the  
4  
5 accuser and the accused do not meet face to face; the discipline process is through an intermediary<sup>19</sup>. A unique, non-punitive approach  
6  
7 is the restorative justice approach used at Dalhousie University where victims, offenders, and administrators work collaboratively to  
8  
9 address sexual harassment and re-integrate offenders<sup>59</sup>. Reporting may have been ineffective in this review due to the impunity offered  
10  
11 to prominent consultants. Senior personnel, particularly those who are well-known and successful in grant funding, are often  
12  
13 considered “untouchable”, beyond reproach by their institutions<sup>60</sup>. Behaviour is often learned and modeling positive behaviours may  
14  
15 break the cycle of bullying in medicine<sup>61</sup>. One approach would be making professionalism a requirement for promotion and career  
16  
17 advancement, as in the Department of Medicine at the University of Toronto in Canada<sup>62</sup>.  
18  
19  
20  
21  
22  
23

### 24 **Strengths and limitations**

25  
26 The strengths of this review include its broad scope; capturing several aspects of academic bullying, and its size (n = 44  
27  
28 studies, 36,262 consultants and trainees). The cohort included was diverse, comprising several specialties and countries. We explicitly  
29  
30 defined eligibility criteria and extracted data in duplicate. We used established tools to assess the risk of bias.  
31  
32  
33  
34

35 There are multiple limitations to this review. Most studies used questionnaires that did not appear to have been validated. The  
36  
37 survey instruments across studies differed from each other, and we pooled responses according to themes to synthesize the results. We  
38  
39 could not account for differences in institutional culture and hospital systems in the responses of survey participants. Data on  
40  
41  
42

1  
2  
3 bully/victim demographics were underrepresented. Selection bias was a significant concern: 13 studies used convenience sampling,  
4  
5 and 2 included voluntary focus groups for victims of bullying to sign up for. Overall, the response rate was 59.2%, with a range of  
6  
7 12% to 100%. Surrogate outcomes were used such as awareness of bullying, and the reporting of outcomes was inconsistent. As such,  
8  
9 the effect of anti-bullying interventions must be interpreted cautiously.  
10  
11  
12  
13

### 14 **Future directions**

15  
16  
17 Significant gaps exist in the quality of the academic bullying literature, particularly with inconsistent definitions and  
18  
19 limitations in study methodology. Our definition may be used to provide the breadth and granularity required to sufficiently capture  
20  
21 cases of academic bullying in medicine. Studies on the impact of academic bullying would benefit from standardized, validated survey  
22  
23 instruments. Although randomization and blinding are not always possible to test the effect of interventions, a control group should be  
24  
25 included in anti-bullying intervention studies.  
26  
27  
28  
29  
30

### 31 **Conclusions:**

32  
33 Academic bullying refers to specific behaviours that disrupt the learning or career of the intended target and commonly  
34  
35 consists of exclusion and overwork. The consequences include significant psychiatric distress and loss of career opportunities. Bullies  
36  
37 tend to be male senior consultants, whereas victims tend to be females. The fear of reprisal and non-enforcement of anti-bullying  
38  
39 policies are the greatest barriers to addressing academic bullying. Results of bullying interventions must be interpreted with caution  
40  
41  
42

1  
2  
3 due to their methodological quality and reliance on surrogate measures. There is a need for well-designed trials with transparent  
4 reporting of relevant outcomes and accounting for temporal trends.  
5  
6  
7  
8  
9

### 10 **Author contributions**

11  
12 TA contributed to study design, informed the search strategy, extracted and synthesized study data, and drafted and edited the  
13 manuscript. YE informed the search strategy, extracted and synthesized study data, and edited the manuscript. HV conceived the study  
14 idea, informed the search strategy, analyzed the data, drafted and edited the manuscript, and supervised the conduct of the study. HV  
15 affirms that the manuscript is an honest, accurate, and transparent account of the study being reported; that no important aspects of the  
16 study have been omitted; and that any discrepancies from the study as planned have been explained.  
17  
18  
19  
20  
21  
22  
23  
24  
25  
26  
27

### 28 **Sources of funding**

29 None.  
30  
31  
32  
33

### 34 **Competing interests**

35 All authors have reported that they have no relationships relevant to the contents of this paper to disclose.  
36  
37  
38  
39  
40  
41  
42

### Ethical approval

Not required.

### Data sharing

All data relevant to the study are included in the article.

### References

1. Farquhar C, Scott J, Blanshard C, Child S, Yang C, Gray B, et al. THE NEW ZEALAND survey. 2008;121(1282):1–85.
2. Lewis D. Workplace bullying. *Body Qual Res.* 2019;42(4):91–106.
3. Fried J, Vermillion M, Parker N, Uijtdehaage S. Eradicating Medical Student Mistreatment: A Longitudinal Study of One Institution's Efforts. *Acad Med.* 2012;87(9):1191–8.
4. Oku AO, Owoaje ET, Oku OO, Monjok E. Mistreatment among undergraduate medical trainees: A case study of a Nigerian medical school. *Niger J Clin Pract.* 2014;17(6):678–82.
5. Kulaylat AN, Qin D, Sun SX, Hollenbeak CS, Schubart JR, Aboud AJ, et al. Perceptions of mistreatment among trainees vary at different stages of clinical training. *BMC Med Educ.* 2017;17(1):1–6.
6. Malinauskiene, V., Bernotaite L., Leisyte P. Bullying Behavior and Mental Health. *Med Pr.* 2017;68(3):307–14.
7. Quine L. Workplace bullying in NHS community trust: staff questionnaire survey. *Bmj.* 1999;318(7178):228–32.

21



- 1
- 2
- 3 8. Okechukwu CA, Souza K, Davis KD, de Castro AB. Discrimination, Harassment, Abuse and Bullying in the Workplace:
- 4
- 5 Contribution of Workplace Injustice to Occupational Health Disparities. *Am J Ind Med.* 2014;57(5):573–86.
- 6
- 7
- 8 9. Quality Assessment Tool for Before-After (Pre-Post) Studies With No Control Group [Internet]. National Heart, Lung, and
- 9
- 10 Blood Institute. Available from: <https://www.nhlbi.nih.gov/health-topics/study-quality-assessment-tools>
- 11
- 12 10. Checklist for Prevalence Studies [Internet]. Joanna Briggs Institute. Available from: [http://joannabriggs.org/research/critical-](http://joannabriggs.org/research/critical-appraisal-tools.html)
- 13
- 14 [appraisal-tools.html](http://joannabriggs.org/research/critical-appraisal-tools.html)
- 15
- 16
- 17 11. Oser TK, Haidet P, Lewis PR, Mauger DT, Gingrich DL, Leong SL. Frequency and negative impact of medical student
- 18
- 19 mistreatment based on specialty choice: A longitudinal study. *Acad Med.* 2014;89(5):755–61.
- 20
- 21
- 22 12. Chadaga AR, Villines D, Krikorian A. Bullying in the American Graduate Medical Education System: A National Cross-
- 23
- 24 Sectional Survey. *PLoS One.* 2016;11(3):e0150246.
- 25
- 26
- 27 13. Mavis B, Sousa A, Lipscomb W, Rappley MD. Learning about medical student mistreatment from responses to the medical
- 28
- 29 school graduation questionnaire. *Acad Med.* 2014;89(5):705–11.
- 30
- 31
- 32 14. House J, Griffith M, Kappy M, Holman E, Santen S. Tracking Student Mistreatment Data to Improve the Emergency Medicine
- 33
- 34 Clerkship Learning Environment. *West J Emerg Med.* 2018;19(January):18–22.
- 35
- 36 15. Wear D, Aultman J. Sexual Harassment in Academic Medicine: Persistence, Non-Reporting, and Institutional Response. *Med*
- 37
- 38 *Educ Online.* 2005;10:1–11.
- 39
- 40 16. Rouse LP, Gallagher-Garza S, Gebhard RE, Harrison SL, Wallace LS. Workplace Bullying Among Family Physicians: A
- 41
- 42
- 43
- 44
- 45
- 46
- 47

- 1  
2  
3 Gender Focused Study. *J Women's Heal*. 2016;25(9):882–8.  
4  
5  
6 17. Kulaylat AN, Qin D, Sun SX, Hollenbeak CS, Schubart JR, Aboud AJ, et al. Aligning perceptions of mistreatment among  
7  
8 incoming medical trainees. *J Surg Res*. 2017;208:151–7.  
9  
10 18. Jagsi R, Griffith KA, Jones R, Perumalswami CR, Ubel P, Stewart A. Sexual harassment and discrimination experiences of  
11  
12 academic medical faculty. *JAMA*. 2016;315(19):2120–1.  
13  
14 19. Best CL, Smith DW, Raymond JR, Greenberg RS, Crouch RK. Preventing and responding to complaints of sexual harassment  
15  
16 in an academic health center: A 10-year review from the medical university of South Carolina. *Acad Med*. 2010;85(4):721–7.  
17  
18 20. Shrier DK, Zucker AN, Mercurio AE, Landry LJ, Rich M, Shrier LA. Generation to Generation: Discrimination and  
19  
20 Harassment Experiences of Physician Mothers and Their Physician Daughters. *J Women's Heal*. 2007;16(6):883–94.  
21  
22 21. Carr PL, Ash AS, Friedman RH, Szalacha L, Barnett RC, Palepu A, et al. Faculty Perceptions of Gender Discrimination and  
23  
24 Sexual Harassment in Academic Medicine. *Ann Intern Med*. 2000;132(11):889–96.  
25  
26 22. Benmore G, Henderson S, Mountfield J, Wink B. The Stopit! programme to reduce bullying and undermining behaviour in  
27  
28 hospitals: Contexts, mechanisms and outcomes. *J Health Organ Manag*. 2018;32(3):428–43.  
29  
30 23. Shabazz T, Parry-Smith W, Oates S, Henderson S, Mountfield J. Consultants as victims of bullying and undermining: A survey  
31  
32 of Royal College of Obstetricians and Gynaecologists consultant experiences. *BMJ Open*. 2016;6(6).  
33  
34 24. Cresswell K, Sivashanmugarajan V, Lodhi W, Yoong W. Bullying workshops for obstetric trainees: A way forward. *Clin*  
35  
36  
37  
38  
39  
40  
41  
42  
43  
44  
45  
46  
47

- 1  
2  
3 25. Cheema S, Ahmad K, Naqvi SA. Bullying of Junior Doctors Prevails in Irish Health System: A Bitter Reality. *Ir Med J*.  
4 2005;98(9):12–4.  
5  
6  
7  
8 26. Imran N, Jawaid M, Haider II, Masood Z. Bullying of junior doctors in Pakistan : A cross- sectional survey. *Singapore Med J*.  
9 2010;51(7):592–5.  
10  
11  
12 27. Duru P, Ocaktan ME, Çelen Ü, Örsal Ö. The Effect of Workplace Bullying Perception on Psychological Symptoms: A  
13 Structural Equation Approach. *Saf Health Work*. 2018;9(2):210–5.  
14  
15  
16  
17 28. Chambers CNL, Frampton CMA, McKee M, Barclay M. It feels like being trapped in an abusive relationship’: Bullying  
18 prevalence and consequences in the New Zealand senior medical workforce: A cross-sectional study. *BMJ Open*. 2018;8(3).  
19  
20  
21 29. Al-Shafae M, Al-Kaabi Y, Al-Farsi Y, White G, Al-Maniri A, Al-Sinawi H, et al. Pilot study on the prevalence of abuse and  
22 mistreatment during clinical internship: A cross-sectional study among first year residents in Oman. *BMJ Open*. 2013;3(2):1–7.  
23  
24  
25  
26 30. Ling M, Young CJ, Shepherd HL, Mak C, Saw RPM. Workplace Bullying in Surgery. *World J Surg*. 2016;40(11):2560–6.  
27  
28  
29 31. Ahmadipour H, Vafadar R. Why mistreatment of medical students is not reported in clinical settings: perspectives of trainees.  
30 *Indian J Med Ethics*. 2016;I(4):215–8.  
31  
32  
33 32. Crebbin W, Campbell G, Hillis DA, Watters DA. Prevalence of bullying, discrimination and sexual harassment in surgery in  
34 Australasia. *ANZ J Surg*. 2015;85(12):905–9.  
35  
36  
37  
38 33. Loerbroks A, Weigl M, Li J, Glaser J, Degen C, Angerer P. Workplace bullying and depressive symptoms: A prospective study  
39 among junior physicians in Germany. *J Psychosom Res*. 2015;78(2):168–72.  
40  
41  
42  
43 24

- 1  
2  
3 34. Owoaje ET, Uchendu OC, Ige OK. Experiences of mistreatment among medical students in a university in south west Nigeria.  
4  
5 Niger J Clin Pract. 2012;15(2):214–9.  
6  
7  
8 35. Ogunsemi OO, Alebiosu OC, Shorunmu OT. A survey of perceived stress, intimidation, harassment and well-being of resident  
9  
10 doctors in a nigerian teaching hospital. Niger J Clin Pract. 2010;13(2):183–6.  
11  
12 36. Nagata-Kobayashi S, Maeno T, Yoshizu M, Shimbo T. Universal problems during residency: Abuse and harassment. Med  
13  
14 Educ. 2009;43(7):628–36.  
15  
16  
17 37. Gadit AAM, Mugford G. A pilot study of bullying and harassment among medical professionals in Pakistan, focussing on  
18  
19 psychiatry: Need for a medical ombudsman. J Med Ethics. 2008;34(6):463–6.  
20  
21 38. Rautio A, Sunnari V, Nuutinen M, Laitala M. Mistreatment of university students most common during medical studies. BMC  
22  
23 Med Educ. 2005;5:1–12.  
24  
25  
26 39. Kapoor S, Ajinkya S, Jadhav PR. Bullying and victimization trends in undergraduate medical students ??? A self-reported  
27  
28 cross-sectional observational survey. J Clin Diagnostic Res. 2016;10(2):VC05–8.  
29  
30  
31 40. Peres MF, Babler F, Arakaki JN, Quaresma IY, Barreto AD, Silva AT E-NJ. Mistreatment in an academic setting and medical  
32  
33 students' perceptions about their course in São Paulo, Brazil: a cross-sectional study. Sao Paulo Med J. 2016;134(2):130–7.  
34  
35  
36 41. Gan R, Snell L. When the learning environment is suboptimal: Exploring medical students' perceptions of “mistreatment.”  
37  
38 Acad Med. 2014;89(4):608–17.  
39  
40 42. Dikmetaş E, Top M, Ergin G. An examination of mobbing and burnout of residents. Turk Psikiyat Derg. 2011;22(3):137–49.  
41  
42  
43 25

- 1  
2  
3 43. Llewellyn A, Karageorge A, Nash L, Li W, Neuen D. Bullying and sexual harassment of junior doctors in New South Wales,  
4 Australia: Rate and reporting outcomes. *Aust Heal Rev.* 2018;(September 2017).  
5  
6  
7  
8 44. Meloni M, Austin M. Implementation and outcomes of a zero tolerance of bullying and harassment program. *Aust Heal Rev.*  
9  
10 2011;35(1):92–4.  
11  
12 45. Chrysafi P, Simou E, Makris M, Malietzis G, Makris GC. Bullying and Sexual Discrimination in the Greek Health Care  
13 System. *J Surg Educ.* 2017;74(4):690–7.  
14  
15  
16  
17 46. Malinauskiene V, Bernotaite L. Workplace bullying and posttraumatic stress symptoms among family physicians in Lithuania.  
18  
19 *Occup Environ Med.* 2014;71(6):A113.  
20  
21  
22 47. Askew DA, Schluter PJ, Dick ML, ??go PM, Turner C, Wilkinson D. Bullying in the Australian medical workforce: Cross-  
23 sectional data from an Australian e-Cohort study. *Aust Heal Rev.* 2012;36(2):197–204.  
24  
25  
26 48. Eriksen GS, Nygreen I, Webster RF. Bullying Among Hospital Staff: Use of Psychometric Triage to Identify Intervention  
27  
28 Priorities. *Psychom Triage Bullying Electron J Appl Psychol.* 2011;7(2):26–31.  
29  
30  
31 49. Wild JRL, Ferguson HJM, McDermott FD, Hornby ST, Gokani VJ. Undermining and bullying in surgical training: A review  
32 and recommendations by the Association of Surgeons in Training. *Int J Surg.* 2015;23:S5–9.  
33  
34  
35 50. Scott KM, Caldwell PH y., Barnes EH, Barrett J. “Teaching by humiliation” and mistreatment of medical students in clinical  
36 rotations: a pilot study. *Med J Aust.* 2015;203(4):1–6.  
37  
38  
39  
40 51. Sharma M. Workplace Bullying: An exploratory study in Australian academia. *Grants Regist 2020.* 2019;315–6.  
41  
42

26

- 1  
2  
3 52. Khoo SB. Academic mobbing: Hidden health hazard at workplace. *Malaysian Fam Physician*. 2010;5(2):61–7.  
4  
5 53. GMC. National training survey 2014. Gen Med Counc. 2014;  
6  
7 54. Niedhammer I, David S, Degioanni S, Drummond A, Philip P. Workplace bullying and psychotropic drug use: The mediating  
8 role of physical and mental health status. *Ann Occup Hyg*. 2011;55(2):152–63.  
9  
10 55. Xu T, Magnusson Hanson LL, Lange T, Starkopf L, Westerlund H, Madsen IEH, et al. Workplace bullying and workplace  
11 violence as risk factors for cardiovascular disease: a multi-cohort study. *Eur Heart J*. 2018;0(1):1–12.  
12  
13 56. Mistry M, Latoo J. Bullying : a growing workplace menace. *Br J Med Pract*. 2009;2(1):23–6.  
14  
15 57. Lavelle-Jones M. Bullying and Undermining Campaign – Let’s Remove it [Internet]. The Royal College of Surgeons of  
16 Edinburgh. 2017 [cited 2019 Mar 3]. p. 1–2. Available from: [https://www.rcsed.ac.uk/news-public-](https://www.rcsed.ac.uk/news-public-affairs/news/2017/june/bullying-and-undermining-campaign-let-s-remove-it)  
17 affairs/news/2017/june/bullying-and-undermining-campaign-let-s-remove-it  
18  
19 58. Rosenstein AH. Physician disruptive behaviors: Five year progress report. *World J Clin Cases*. 2015;3(11):930.  
20  
21 59. Acosta D, Karp DR. Restorative Justice as the Rx for Mistreatment in Academic Medicine: Applications to Consider for  
22 Learners, Faculty, and Staff. *Acad Med*. 2018;354–6.  
23  
24 60. Watters DAK, Hillis DJ. Discrimination, bullying and sexual harassment: Where next for medical leadership? *Med J Aust*.  
25 2015;203(4):175-175e.1.  
26  
27 61. Lehmann LS, Sulmasy LS, Desai S, Ethics ACP. Annals of Internal Medicine Hidden Curricula , Ethics , and Professionalism :  
28 Optimizing Clinical Learning Environments in Becoming and Being a Physician : A Position Paper of the American College of  
29  
30  
31  
32  
33  
34  
35  
36  
37  
38  
39  
40  
41  
42  
43  
44  
45  
46  
47

1  
2  
3 Physicians. Ann Intern Med. 2018;168(7):506–8.  
4

5 62. Singer H. Addressing unprofessional behaviour among physicians [Internet]. St. Michael's Hospital. 2018 [cited 2019 Mar 2].  
6

7 Available from: [http://stmichaelshospital.com/media/detail.php?source=hospital\\_news/2018/0730](http://stmichaelshospital.com/media/detail.php?source=hospital_news/2018/0730)  
8  
9  
10  
11  
12  
13  
14  
15  
16  
17  
18  
19  
20  
21  
22  
23  
24  
25  
26  
27  
28  
29  
30  
31  
32  
33  
34  
35  
36  
37  
38  
39  
40  
41  
42

**Table 1. Summary of studies investigating bullying in academic medicine**

| Author (year), Country              | Study design | Setting                             | Definition of academic bullying | Target                                           | Perpetrator                                                                                          | Source of bias                                                                                                                                                     | Risk of Bias |
|-------------------------------------|--------------|-------------------------------------|---------------------------------|--------------------------------------------------|------------------------------------------------------------------------------------------------------|--------------------------------------------------------------------------------------------------------------------------------------------------------------------|--------------|
| Benmore et al. (2018), England      | Before-after | Academic hospital*                  | Data not provided               | Residents                                        | Senior consultants                                                                                   | Insufficient enrollment, inadequate sample size, no blinding of outcome assessors, high loss to follow-up, lack of statistical analysis or ITS <sup>†</sup> design | High         |
| Duru et al. (2018), Turkey          | Survey       | Academic hospital                   | Data not provided               | Consultants, researchers, administrators, nurses | Specific occupations of bullies not specified                                                        | Inappropriate sampling and inadequate sample size                                                                                                                  | Moderate     |
| Chambers et al. (2018), New Zealand | Survey       | Academic and non-academic hospitals | Data not provided               | Specialist consultants                           | Primarily male. Senior medical staff 52.5%, non-clinical managers 31.8%, and clinical leaders 24.9%. | Low response rate                                                                                                                                                  | Low          |
| House et al. (2018), USA            | Before-after | Academic hospital                   | Data not provided               | Medical Students                                 | Faculty most frequently were the source of                                                           | Insufficient enrollment, inadequate sample size,                                                                                                                   | High         |



1  
2  
3  
4  
5  
6  
7  
8  
9  
10  
11  
12  
13  
14  
15  
16  
17  
18  
19  
20  
21  
22  
23  
24  
25  
26  
27  
28  
29  
30  
31  
32  
33  
34  
35  
36  
37  
38  
39  
40  
41  
42  
43  
44  
45  
46  
47

|                                     |        |                    |                                                                                                                                                           |                    |                                                               |                                                                                                                                         |          |
|-------------------------------------|--------|--------------------|-----------------------------------------------------------------------------------------------------------------------------------------------------------|--------------------|---------------------------------------------------------------|-----------------------------------------------------------------------------------------------------------------------------------------|----------|
|                                     |        |                    |                                                                                                                                                           |                    | bullying followed by residents. Exact breakdown not specified | no blinding of outcome assessors, outcomes not clearly described, lack of statistical analysis, individual-level analysis or ITS design |          |
| Kulaylat et al. (2017), USA         | Survey | Academic hospital  | Verbal abuse, specialty-choice discrimination, non-educational tasks, withholding/denying learning opportunities, neglect and gender/racial insensitivity | Medical Students   | Faculty (57%), residents, fellows (49%), and nurses (33%)     | Inappropriate sampling, inadequate sample size, classification bias, and non-validated identification or measurement of bullying        | High     |
| Bernotaite et al. (2017), Lithuania | Survey | Academic hospitals | Data not provided                                                                                                                                         | Family Consultants | 25.3% supervisor, 9.8% colleague, 2.9% subordinate            | Inappropriate sampling, inadequate sample size, and coverage bias                                                                       | Moderate |

|                                    |        |                                     |                       |                       |                                                                                                                                                        |                                                                       |          |
|------------------------------------|--------|-------------------------------------|-----------------------|-----------------------|--------------------------------------------------------------------------------------------------------------------------------------------------------|-----------------------------------------------------------------------|----------|
| Chrysafi et al. (2017), Greece     | Survey | Academic and non-academic hospitals | Data not provided     | Consultants           | Surgeons most frequently followed by internal medicine consultants, then radiologists/ laboratory consultants                                          | Low response rate and coverage bias                                   | Moderate |
| Kapoor et al. (2016), India        | Survey | Academic hospital                   | Data not provided     | Medical students      | Data not provided                                                                                                                                      | Inappropriate sampling and inadequate description of study population | Moderate |
| Chadaga et al. (2016), USA         | Survey | Academic hospitals                  | NAQ <sup>‡</sup> used | Residents and fellows | Consultants 29%, nurses 27%, patients 23%, peers 19%                                                                                                   | Low response rate, inadequate sample size, and coverage bias          | Moderate |
| Llewellyn et al. (2016), Australia | Survey | Academic hospitals                  | Data not provided     | Residents             | Senior medical staff: 58.3% in 2015, 60.6% in 2016. Non-medical staff 33.2% 2015, 33.9% 2016, Manager 5.2% in 2015, 1.2% in 2016, junior resident 3.3% | Low response rate, biased sampling, coverage and classification bias  | High     |

1  
2  
3  
4  
5  
6  
7  
8  
9  
10  
11  
12  
13  
14  
15  
16  
17  
18  
19  
20  
21  
22  
23  
24  
25  
26  
27  
28  
29  
30  
31  
32  
33  
34  
35  
36  
37  
38  
39  
40  
41  
42  
43  
44  
45  
46  
47

|                                |        |                                           |                                                                                                                                                                                                                                                                                                  |                                   |                                                                                          |                                                     |          |
|--------------------------------|--------|-------------------------------------------|--------------------------------------------------------------------------------------------------------------------------------------------------------------------------------------------------------------------------------------------------------------------------------------------------|-----------------------------------|------------------------------------------------------------------------------------------|-----------------------------------------------------|----------|
|                                |        |                                           |                                                                                                                                                                                                                                                                                                  |                                   | in 2015, 4.3%<br>in 2016                                                                 |                                                     |          |
| Rouse et al.<br>(2016), USA    | Survey | Academic<br>clinics                       | NAQ used                                                                                                                                                                                                                                                                                         | Family<br>medicine<br>consultants | Data not<br>provided                                                                     | Low response<br>rate                                | Low      |
| Shabazz et al.<br>(2016), UK   | Survey | Academic and<br>non-academic<br>hospitals | Belittle and<br>undermine an<br>individual's<br>work;<br>undermining<br>an individual's<br>integrity;<br>persistent and<br>unjustified<br>criticism and<br>monitoring of<br>work; freezing<br>out, ignoring<br>or excluding<br>and continual<br>undervaluing<br>of an<br>individual's<br>effort. | Gynecology<br>consultants         | 50.9% senior<br>consultants,<br>22.3% junior<br>consultants,<br>4.5% medical<br>director | Low response<br>rate, and<br>classification<br>bias | Moderate |
| Peres et al.<br>(2016), Brazil | Survey | Academic<br>hospital                      | Data not<br>provided                                                                                                                                                                                                                                                                             | Medical<br>students               | Data not<br>provided                                                                     | Low response<br>rate, and<br>classification<br>bias | Moderate |

|                                |              |                    |                                                                                            |                                           |                                                                                                                                                                                                                           |                                                          |          |
|--------------------------------|--------------|--------------------|--------------------------------------------------------------------------------------------|-------------------------------------------|---------------------------------------------------------------------------------------------------------------------------------------------------------------------------------------------------------------------------|----------------------------------------------------------|----------|
| Ling et al. (2016), Australia  | Survey       | Academic hospitals | NAQ used                                                                                   | General surgery residents and consultants | For trainee victims: staff surgeon 48%, trainee surgeon 13%, admin 13%, nurses 11%, other consultant 6%<br>For consultant victims; 31% staff surgeon, 28% admin, 13% other consultant, 11% nurses, other 10%, trainees 4% | Low response rate                                        | Low      |
| Kulaylat et al. (2016), USA    | Before-after | Academic hospital  | Data not provided                                                                          | Medical Students                          | Faculty (57%), residents/fellows (49%), and nurses (33%)                                                                                                                                                                  | Inadequate sample size, no blinding of outcome assessors | Moderate |
| Ahmadipour et al. (2016), Iran | Survey       | Academic hospital  | Being assigned tasks as punishment, being threatened with an unjustly bad score or failure | Medical students, interns and residents   | Data not provided                                                                                                                                                                                                         | Inadequate sample size                                   | Low      |

1  
2  
3  
4  
5  
6  
7  
8  
9  
10  
11  
12  
13  
14  
15  
16  
17  
18  
19  
20  
21  
22  
23  
24  
25  
26  
27  
28  
29  
30  
31  
32  
33  
34  
35  
36  
37  
38  
39  
40  
41  
42  
43  
44  
45  
46  
47

|                                                  |              |                    |                   |                                                |                                                                                   |                                                                                                                                                                                                                              |          |
|--------------------------------------------------|--------------|--------------------|-------------------|------------------------------------------------|-----------------------------------------------------------------------------------|------------------------------------------------------------------------------------------------------------------------------------------------------------------------------------------------------------------------------|----------|
| Jagsi et al. (2016), USA                         | Survey       | Academic hospital  | Data not provided | Consultants who won a career advancement award | Data not provided                                                                 | Inadequate sampling frame and classification bias                                                                                                                                                                            | Moderate |
| Crebbin et al. (2015), Australia and New Zealand | Survey       | Academic hospitals | Data not provided | Residents, fellows and consultants             | 50% surgical consultants, other medical consultants (24%) and nursing staff (26%) | Low response rate                                                                                                                                                                                                            | Low      |
| Cresswell et al. (2016), UK                      | Before-after | Academic hospital  | Data not provided | Residents                                      | Data not provided                                                                 | Insufficient description of study objectives, inadequate enrollment and sample size, no blinding of outcome assessors, outcomes not clearly described, lack of statistical analysis or ITS design and high loss to follow-up | High     |
| Loerbroks et al. (2015), Germany                 | Survey       | Academic hospitals | Data not provided | Residents                                      | Data not provided                                                                 | -                                                                                                                                                                                                                            | Low      |

34

|                                                                                                    |                                        |        |                      |                                                                                                                                                                        |                             |                                                                                         |                                                                                        |          |
|----------------------------------------------------------------------------------------------------|----------------------------------------|--------|----------------------|------------------------------------------------------------------------------------------------------------------------------------------------------------------------|-----------------------------|-----------------------------------------------------------------------------------------|----------------------------------------------------------------------------------------|----------|
| 1<br>2<br>3<br>4<br>5<br>6<br>7<br>8<br>9<br>10                                                    | Malinauskiene et al. (2014), Lithuania | Survey | Non-academic clinics | NAQ used                                                                                                                                                               | Family medicine consultants | Bullying from patients 11.8%, from colleagues by 8.4%, from superiors by 26.6%.         | -                                                                                      | Low      |
| 11<br>12<br>13<br>14<br>15<br>16<br>17<br>18<br>19<br>20<br>21<br>22<br>23<br>24<br>25<br>26<br>27 | Mavis et al. (2014), USA               | Survey | Academic hospitals   | Mistreatment either intentional or unintentional occurs when behavior shows disrespect for the dignity of others and unreasonably interferes with the learning process | Medical students            | Clinical faculty in the hospital (31%) residents/ interns (28%), nurses (11%)           | Low response rate, inadequate description of study population and statistical analysis | Moderate |
| 28<br>29<br>30<br>31<br>32<br>33<br>34<br>35                                                       | Oser et al. (2014), USA                | Survey | Academic hospital    | Data not provided                                                                                                                                                      | Medical students            | Residents > clerkship faculty > other attendings > other students > preceptors = nurses | -                                                                                      | Low      |
| 36<br>37<br>38<br>39<br>40<br>41<br>42                                                             | Oku et al. (2014), Nigeria             | Survey | Academic hospital    | Data not provided                                                                                                                                                      | Medical students            | 23.7% other students, 21.7% consultants, 17.5%                                          | -                                                                                      | Low      |

1  
2  
3  
4  
5  
6  
7  
8  
9  
10  
11  
12  
13  
14  
15  
16  
17  
18  
19  
20  
21  
22  
23  
24  
25  
26  
27  
28  
29  
30  
31  
32  
33  
34  
35  
36  
37  
38  
39  
40  
41  
42  
43  
44  
45  
46  
47

|                               |              |                    |                                                                                                                                               |                  |                                                                            |                                                                                      |      |
|-------------------------------|--------------|--------------------|-----------------------------------------------------------------------------------------------------------------------------------------------|------------------|----------------------------------------------------------------------------|--------------------------------------------------------------------------------------|------|
|                               |              |                    |                                                                                                                                               |                  | lecturers, 16.5% consultants, 16.5% nurses, 4.1% other staff               |                                                                                      |      |
| Gan et al. (2014), Canada     | Survey       | Academic hospital  | Data not provided                                                                                                                             | Medical students | Consultants                                                                | Low response rate, inappropriate sampling, small sample size and classification bias | High |
| Fried et al. (2015), USA      | Before-after | Academic hospital  | Power mistreatment defined as “made to feel intimidated, dehumanized, or had a threat made about a recommendation, your grade, or your career | Medical students | Residents 49.7%, Clinical faculty 36.9%, preclinical faculty 7.9%          | -                                                                                    | low  |
| Al-Shafae et al. (2013), Oman | Survey       | Academic hospitals | Being coerced into carrying out personal services unrelated to the expected role of interns and instances                                     | Residents        | Internal medicine 60.3%, surgery 29%, pediatrics 15.5%. Specialists 51.7%, | Inappropriate sampling, inadequate sample size, inadequate description of study      | High |

|                                |        |                                     |                                                                                                                                                                                       |                  |                                                                                                            |                              |     |
|--------------------------------|--------|-------------------------------------|---------------------------------------------------------------------------------------------------------------------------------------------------------------------------------------|------------------|------------------------------------------------------------------------------------------------------------|------------------------------|-----|
|                                |        |                                     | in which interns were excluded from reasonable learning opportunities offered to others, or threatened with failure or poor evaluations for reasons unrelated to academic performance |                  | consultants 50%, residents 12.1%, nurses 24.1%                                                             | population and coverage bias |     |
| Owoaje et al. (2012), Nigeria  | Survey | Academic hospital                   | Data not provided                                                                                                                                                                     | Medical Students | Consultants 69.1%, residents/fellows 52.4%, other students 15.7%, nurses 7.8%, laboratory technicians 4.1% | Low response rate            | Low |
| Askew et al. (2012), Australia | Survey | Academic and non-academic hospitals | Data not provided                                                                                                                                                                     | Consultants      | Consultants 44%, Managers 27%, Patients 15%, Nurses/midwives 4%,                                           | Low response rate            | Low |



1  
2  
3  
4  
5  
6  
7  
8  
9  
10  
11  
12  
13  
14  
15  
16  
17  
18  
19  
20  
21  
22  
23  
24  
25  
26  
27  
28  
29  
30  
31  
32  
33  
34  
35  
36  
37  
38  
39  
40  
41  
42  
43  
44  
45  
46  
47

|                                 |              |                    |                                                                          |                    |                                                |                                                                                                                                                       |          |
|---------------------------------|--------------|--------------------|--------------------------------------------------------------------------|--------------------|------------------------------------------------|-------------------------------------------------------------------------------------------------------------------------------------------------------|----------|
|                                 |              |                    |                                                                          |                    | junior consultants 1%                          |                                                                                                                                                       |          |
| Meloni et al. (2011), Australia | Before-after | Academic hospital  | Data not provided                                                        | Hospital employees | Data not provided                              | Lack of blinding of outcome assessors, high loss to follow-up, lack of statistical analysis or ITS design, and unit of analysis not clearly described | High     |
| Dikmetas et al. (2011), Turkey  | Survey       | Academic hospital  | Data not provided                                                        | Residents          | Surgeons > Internists                          | Low response rate                                                                                                                                     | Moderate |
| Eriksen et al. (2011), Norway   | Survey       | Academic hospital  | NAQ used                                                                 | Hospital employees | Colleagues. Specific occupations not described | Low response rate, inappropriate sampling and inadequate statistical analysis                                                                         | Moderate |
| Imran et al. (2010), Pakistan   | Survey       | Academic hospitals | Threats to professional status, threats to personal standing, isolation, | Residents          | Consultants                                    | Inappropriate sampling, classification and coverage bias                                                                                              | Moderate |

|                                       |              |                    |                                                          |             |                                                                                                                                            |                                                                                                                                                                  |      |
|---------------------------------------|--------------|--------------------|----------------------------------------------------------|-------------|--------------------------------------------------------------------------------------------------------------------------------------------|------------------------------------------------------------------------------------------------------------------------------------------------------------------|------|
|                                       |              |                    | overwork, and destabilization                            |             |                                                                                                                                            |                                                                                                                                                                  |      |
| Ogunsemi et al. (2010), Nigeria       | Survey       | Academic hospital  | Data not provided                                        | Residents   | 58% administrative staff, 41.4% from the hospital chief executive, 40.4% from patient relatives, 32.7% nurses, 30% residents, 20% patients | Inadequate sample size                                                                                                                                           | Low  |
| Best et al. (2010), USA               | Before-after | Academic hospital  | Data not provided                                        | Unspecified | Data not provided                                                                                                                          | Study objective not clearly described, insufficient enrollment, no blinding of outcome assessors, lack of statistical or individual-level analysis or ITS design | High |
| Nagata-Kobayashi et al. (2009), Japan | Survey       | Academic hospitals | Assigned you tasks as punishment; threatened to fail you | Residents   | Surgery (27.6%), internal medicine (21.4%),                                                                                                | Low response rate                                                                                                                                                | Low  |

1  
2  
3  
4  
5  
6  
7  
8  
9  
10  
11  
12  
13  
14  
15  
16  
17  
18  
19  
20  
21  
22  
23  
24  
25  
26  
27  
28  
29  
30  
31  
32  
33  
34  
35  
36  
37  
38  
39  
40  
41  
42  
43  
44  
45  
46  
47

|                                  |        |                                     |                                                                                                                                                             |             |                                                                                                  |                                                                               |          |
|----------------------------------|--------|-------------------------------------|-------------------------------------------------------------------------------------------------------------------------------------------------------------|-------------|--------------------------------------------------------------------------------------------------|-------------------------------------------------------------------------------|----------|
|                                  |        |                                     | unfairly in residency; competed maliciously or unfairly with you; made negative remarks to you about becoming a consultant or pursuing a career in medicine |             | emergency medicine (11.5%), anaesthesia (11.3%). Consultants 34.1%, patients 21.7%, nurses 17.2% |                                                                               |          |
| Scott et al. (2008), New Zealand | Survey | Academic hospital                   | A threat to professional status and personal standing, isolation, enforced overwork, destabilization                                                        | Residents   | Consultants 30%, nurses 30%, patients 25%, radiologists 8%, residents/fellows 7%                 | Low response rate, inadequate sample size and description of study population | Moderate |
| Gadit et al. (2007), Pakistan    | Survey | Academic and non-academic hospitals | Data not provided                                                                                                                                           | Consultants | Senior colleagues                                                                                | Inadequate sample size                                                        | Low      |
| Shrier et al. (2007), USA        | Survey | Academic and non-academic hospitals | Data not provided                                                                                                                                           | Consultants | Colleagues 24%, patients 19%, teachers 18%, supervisors 15%,                                     | Inappropriate sampling, inadequate sample size, and coverage bias             | Moderate |

|                               |        |                      |                   |                  |                                                                                                       |                                                                                      |      |
|-------------------------------|--------|----------------------|-------------------|------------------|-------------------------------------------------------------------------------------------------------|--------------------------------------------------------------------------------------|------|
| Cheema et al. (2005), Ireland | Survey | Academic hospitals   | Data not provided | Residents        | Senior residents 51-70%, Nursing staff 47-59%, Administration 15-16%, Colleagues 12-13%               | Low response rate                                                                    | Low  |
| Rautio et al. (2005), Finland | Survey | Academic hospital    | Data not provided | Medical students | Lecturers 27.9%, Research/senior research fellows 27.7%, Professors 16.6%, Associate professors 13.6% | Low response rate, inappropriate sampling, inadequate sample size, and coverage bias | High |
| Carr et al. (2000), USA       | Survey | Academic hospitals   | Data not provided | Consultants      | Superiors and colleagues                                                                              | -                                                                                    | Low  |
| Quine (1999), UK              | Survey | Non-academic clinics | Data not provided | Consultants      | 54% greater seniority, 34% same seniority, 12% less senior. 49% of bullies older than victim          | -                                                                                    | Low  |
| Wear et al. (2005), USA       | Survey | Academic hospital    | Data not provided | Medical students | General surgeons and obstetricians                                                                    | Low response rate, inappropriate sampling, inadequate                                | High |

1  
2  
3  
4  
5  
6  
7  
8  
9  
10  
11  
12  
13  
14  
15  
16  
17  
18  
19  
20  
21  
22  
23  
24  
25  
26  
27  
28  
29  
30  
31  
32  
33  
34  
35  
36  
37  
38  
39  
40  
41  
42  
43  
44  
45  
46  
47

|  |  |  |  |  |  |                                                                                   |  |
|--|--|--|--|--|--|-----------------------------------------------------------------------------------|--|
|  |  |  |  |  |  | sample size,<br>classification<br>and lack of<br>validated<br>measurement<br>tool |  |
|--|--|--|--|--|--|-----------------------------------------------------------------------------------|--|

\*Academic hospitals/clinics were defined as teaching hospitals/clinics with a university affiliation

†Interrupted time series

‡The NAQ is the negative acts questionnaire, a validated tool for assessing the prevalence of workplace bullying

For peer review only

**Table 2: Self-reported description of specific bullying behaviours**

| Behaviour                                               | No. of studies/<br>Total studies* | Total cohort<br>No. affected/<br>total participants who<br>completed surveys on<br>behaviours (%)* | Men<br>No. affected/<br>total men who<br>completed surveys on<br>behaviours (%)† | Women<br>No. affected/<br>Total women who<br>completed surveys on<br>behaviours (%)† |
|---------------------------------------------------------|-----------------------------------|----------------------------------------------------------------------------------------------------|----------------------------------------------------------------------------------|--------------------------------------------------------------------------------------|
| <b>Threats to professional status</b>                   |                                   |                                                                                                    |                                                                                  |                                                                                      |
| Persistent unjustified criticism                        | 10/19                             | 2587/10404 (24.9)                                                                                  | 535/1690 (31.7)                                                                  | 552/1402 (39.4)                                                                      |
| Excessive monitoring of work                            | 6/19                              | 1752/6079 (28.8)                                                                                   | 442/1525 (27.7)                                                                  | 441/1298 (34.0)                                                                      |
| Intimidatory use of discipline                          | 11/19                             | 1156/17046 (6.8)                                                                                   | 323/1746 (18.5)                                                                  | 237/1546 (15.3)                                                                      |
| Spread of gossip/rumours                                | 5/19                              | 892/3694 (24.2)                                                                                    | 88/596 (14.8)                                                                    | 94/453 (20.8)                                                                        |
| False allegations                                       | 5/19                              | 577/3694 (15.6)                                                                                    | 59/596 (9.9)                                                                     | 54/453 (11.9)                                                                        |
| Refusal of leave, training or promotion                 | 6/19                              | 1174/6079 (19.3)                                                                                   | 215/1690 (12.7)                                                                  | 197/1402 (14.1)                                                                      |
| <b>Isolation</b>                                        |                                   |                                                                                                    |                                                                                  |                                                                                      |
| Social/professional exclusion                           | 13/19                             | 3895/13963 (27.9)                                                                                  | 301/1718 (17.5)                                                                  | 925/2385 (38.8)                                                                      |
| <b>Overwork</b>                                         |                                   |                                                                                                    |                                                                                  |                                                                                      |
| Undue pressure to produce work                          | 7/19                              | 2509/6562 (38.2)                                                                                   | 233/1525 (15.3)                                                                  | 355/1570 (22.6)                                                                      |
| Setting impossible deadlines                            | 6/19                              | 1571/6079 (25.8)                                                                                   | 164/1525 (10.8)                                                                  | 189/1298 (14.6)                                                                      |
| <b>Destabilization</b>                                  |                                   |                                                                                                    |                                                                                  |                                                                                      |
| Shifting goalposts                                      | 1/19                              | 54/417 (12.9)                                                                                      | Not reported                                                                     | Not reported                                                                         |
| Removal of areas of responsibility without consultation | 8/19                              | 1397/6193 (22.6)                                                                                   | 160/1525 (10.5)                                                                  | 171/1298 (13.2)                                                                      |

1  
2  
3  
4  
5  
6  
7  
8  
9  
10  
11  
12  
13  
14  
15  
16  
17  
18  
19  
20  
21  
22  
23  
24  
25  
26  
27  
28  
29  
30  
31  
32  
33  
34  
35  
36  
37  
38  
39  
40  
41  
42  
43  
44  
45  
46  
47

|                                                  |      |                  |                 |                 |
|--------------------------------------------------|------|------------------|-----------------|-----------------|
| Withholding information that affects performance | 7/19 | 1786/6137 (29.1) | 219/1553 (14.1) | 267/1328 (20.1) |
| Ordered to work below one's competence level     | 9/19 | 2860/8017 (35.7) | 81/625 (13.0)   | 99/483 (20.5)   |

\*Total number of studies that described types of bullying behaviours, including studies that did not stratify results by sex. As a result, the denominator for the number of participants in total is not the sum of the denominators for men and women. The denominator was calculated from the total number of individuals who completed surveys on specific bullying behaviours, while the numerator was calculated from the number of individuals who indicated they experienced the specified bullying behaviour. Not all survey studies offered respondents the same options to respond to, and as a result the denominators for each bullying behaviour differ.

†Of the studies that separated data by gender or solely included the results of one gender and included the specified bullying behaviour.

peer review only

**Table 3. Self-reported impact of academic bullying**

| Effect of academic bullying                                      | No. of studies/<br>Total studies* | Total cohort<br>No. of affected<br>participants/<br>total participants who<br>completed surveys on<br>the impact of bullying<br>(%)* | Men<br>No. of affected men/<br>total men who<br>completed surveys on<br>the impact of bullying<br>(%)† | Women<br>No. of affected women/<br>total women who<br>completed surveys on<br>the impact of bullying<br>(%)† |
|------------------------------------------------------------------|-----------------------------------|--------------------------------------------------------------------------------------------------------------------------------------|--------------------------------------------------------------------------------------------------------|--------------------------------------------------------------------------------------------------------------|
| <b>Psychologic</b>                                               |                                   |                                                                                                                                      |                                                                                                        |                                                                                                              |
| Psychologic distress<br>including<br>depressive/PTSD<br>symptoms | 9/20                              | 839/2076 (40.4)                                                                                                                      | 103/161 (64.0)                                                                                         | 64/101 (63.4)                                                                                                |
| Reduced confidence in<br>clinical skill                          | 4/20                              | 296/1518 (19.5)                                                                                                                      | 68/212 (32.1)                                                                                          | 97/597 (16.2)                                                                                                |
| <b>Career</b>                                                    |                                   |                                                                                                                                      |                                                                                                        |                                                                                                              |
| Missed career<br>opportunities                                   | 12/20                             | 1570/6637 (23.7)                                                                                                                     | 89/812 (11.0)                                                                                          | 310/1325 (23.4)                                                                                              |
| Considerations of quitting                                       | 8/20                              | 1023/2704 (37.8)                                                                                                                     | Not reported                                                                                           | Not reported                                                                                                 |
| Termination of<br>employment                                     | 3/20                              | 84/1046 (8.0)                                                                                                                        | 4/139 (2.9)                                                                                            | 4/150 (2.7)                                                                                                  |
| Leave of absence                                                 | 2/20                              | 50/748 (6.7)                                                                                                                         | Not reported                                                                                           | Not reported                                                                                                 |
| Self-reported worsening<br>of clinical performance               | 5/20                              | 528/1801 (29.3)                                                                                                                      | 42/161 (26.1)                                                                                          | 22/101 (21.8)                                                                                                |

\*Total number of studies that described the impact of bullying, including studies that did not stratify results by sex. Not all participants were given the same options to select from.

†Of the studies that separated data by gender or solely included the results of one gender and included the impact of bullying.



1  
2  
3  
4  
5  
6  
7  
8  
9  
10  
11  
12  
13  
14  
15  
16  
17  
18  
19  
20  
21  
22  
23  
24  
25  
26  
27  
28  
29  
30  
31  
32  
33  
34  
35  
36  
37  
38  
39  
40  
41  
42  
43  
44  
45  
46  
47

**Table 4. Barriers to addressing academic bullying**

| <b>Barrier</b>                                 | <b>No. of studies/Total studies*</b> | <b>No. of participants/ total participants (%)</b> |
|------------------------------------------------|--------------------------------------|----------------------------------------------------|
| <b>Low reporting rates</b>                     |                                      |                                                    |
| Lack of awareness of what constitutes bullying | 3/18                                 | 53/397 (13.4)                                      |
| Lack of awareness of reporting process         | 8/18                                 | 934/2931 (31.9)                                    |
| Lack of perceived benefit                      | 4/18                                 | 214/538 (39.8)                                     |
| Fear that bullying would worsen                | 6/18                                 | 448/1168 (38.4)                                    |
| Fear of career ramifications                   | 7/18                                 | 829/2199 (37.7)                                    |
| Concerns regarding confidentiality             | 3/18                                 | 48/397 (12.1)                                      |
| <b>Institutional factors</b>                   |                                      |                                                    |
| Hierarchical nature of medicine                | 4/18                                 | Not reported                                       |
| Recurring cycle of abuse                       | 3/18                                 | Not reported                                       |
| Normalization of bullying                      | 5/18                                 | Not reported                                       |
| Lack of enforcement                            | 5/18                                 | 391/1106 (35.4)                                    |

\*Total number of studies that described barriers of bullying behaviours

**Supplementary table S1: Pooled prevalence of specific bullying behaviours by level of training**

| <b>Behaviour</b>                        | <b>No. of studies/<br/>Total studies*</b> | <b>Medical Students<br/>No. of participants/<br/>total participants<br/>(%)*</b> | <b>Residents and<br/>fellows<br/>No. of participants/<br/>total participants<br/>(%)*</b> | <b>Consultants<br/>No. of participants/<br/>total participants<br/>(%)*</b> |
|-----------------------------------------|-------------------------------------------|----------------------------------------------------------------------------------|-------------------------------------------------------------------------------------------|-----------------------------------------------------------------------------|
| <b>Threats to professional status</b>   |                                           |                                                                                  |                                                                                           |                                                                             |
| Persistent unjustified criticism        | 8/17                                      | 192/269 (71.4)                                                                   | 1696/6444 (26.3)                                                                          | 600/2881 (20.8)                                                             |
| Excessive monitoring of work            | 4/17                                      | Not reported                                                                     | 1020/2445 (41.7)                                                                          | 564/2824 (20.0)                                                             |
| Intimidatory use of discipline          | 11/17                                     | 565/13363 (4.2)                                                                  | 541/2561 (21.1)                                                                           | 38/1112 (3.4)                                                               |
| Spread of gossip/rumours                | 3/17                                      | Not reported                                                                     | Not reported                                                                              | 755/2881 (26.2)                                                             |
| False allegations                       | 3/17                                      | Not reported                                                                     | Not reported                                                                              | 509/2881 (17.7)                                                             |
| <b>Isolation</b>                        |                                           |                                                                                  |                                                                                           |                                                                             |
| Social/professional exclusion           | 12/17                                     | 156/776 (20.1)                                                                   | 1684/6019 (28.0)                                                                          | 1272/4445 (28.6)                                                            |
| Refusal of leave, training or promotion | 4/17                                      | Not reported                                                                     | 286/2445 (11.7)                                                                           | 727/2824 (25.7)                                                             |
| <b>Overwork</b>                         |                                           |                                                                                  |                                                                                           |                                                                             |
| Undue pressure to produce work          | 7/17                                      | Not reported                                                                     | 827/2928 (28.2)                                                                           | 1326/2824 (47.0)                                                            |
| Setting impossible deadlines            | 6/17                                      | Not reported                                                                     | 351/2445 (14.4)                                                                           | 965/2824 (34.2)                                                             |
| <b>Destabilization</b>                  |                                           |                                                                                  |                                                                                           |                                                                             |
| Shifting goalposts                      | 1/17                                      | Not reported                                                                     | 54/654 (8.3)                                                                              | Not reported                                                                |

1  
2  
3  
4  
5  
6  
7  
8  
9  
10  
11  
12  
13  
14  
15  
16  
17  
18  
19  
20  
21  
22  
23  
24  
25  
26  
27  
28  
29  
30  
31  
32  
33  
34  
35  
36  
37  
38  
39  
40  
41  
42  
43  
44  
45  
46  
47

|                                                         |      |                |                  |                  |
|---------------------------------------------------------|------|----------------|------------------|------------------|
| Removal of areas of responsibility without consultation | 6/17 | 11/56 (19.6)   | 267/2503 (10.7)  | 784/2824 (27.8)  |
| Withholding information that affects performance        | 5/17 | Not reported   | 415/2503 (16.6)  | 1140/2824 (40.4) |
| Ordered to work below one's competence level            | 6/17 | 182/269 (67.7) | 1202/3574 (33.6) | 975/2881 (33.8)  |

\*Total number of studies that described types of bullying behaviours that separated data by level of training

For peer review only

**Supplementary table S2: The pooled impact of academic bullying by level of training**

| <b>Effect of academic bullying</b>                      | <b>No. of studies/<br/>Total studies*</b> | <b>Medical Students<br/>No. of participants/<br/>total participants<br/>(%)*</b> | <b>Residents and<br/>fellows<br/>No. of participants/<br/>total participants<br/>(%)*</b> | <b>Consultants<br/>No. of participants/<br/>total participants<br/>(%)*</b> |
|---------------------------------------------------------|-------------------------------------------|----------------------------------------------------------------------------------|-------------------------------------------------------------------------------------------|-----------------------------------------------------------------------------|
| <b>Psychiatric</b>                                      |                                           |                                                                                  |                                                                                           |                                                                             |
| Psychiatric distress including depressive/PTSD symptoms | 8/19                                      | 422/579 (72.9)                                                                   | 220/456 (48.2)                                                                            | 178/996 (17.9)                                                              |
| Reduced confidence in clinical skill                    | 4/19                                      | 119/262 (45.4)                                                                   | Not reported                                                                              | 177/1259 (14.1)                                                             |
| <b>Career</b>                                           |                                           |                                                                                  |                                                                                           |                                                                             |
| Missed career opportunities                             | 12/19                                     | 484/3020 (16.0)                                                                  | 141/389 (36.2)                                                                            | 948/3228 (29.4)                                                             |
| Considered quitting                                     | 8/19                                      | 109/317 (34.4)                                                                   | Not reported                                                                              | 908/2375 (38.2)                                                             |
| Terminated employment                                   | 3/19                                      | Not reported                                                                     | 73/698 (10.5)                                                                             | 11/348 (3.2)                                                                |
| Leave of absence                                        | 2/19                                      | Not reported                                                                     | Not reported                                                                              | 50/748 (6.7)                                                                |
| Self-reported worsening of clinical performance         | 4/19                                      | 202/579 (34.9)                                                                   | 35/203 (17.2)                                                                             | 51/563 (9.1)                                                                |

\*Total number of studies that described the impact of academic bullying and separated data by level of training

1  
2  
3  
4  
5  
6  
7  
8  
9  
10  
11  
12  
13  
14  
15  
16  
17  
18  
19  
20  
21  
22  
23  
24  
25  
26  
27  
28  
29  
30  
31  
32  
33  
34  
35  
36  
37  
38  
39  
40  
41  
42  
43  
44  
45  
46  
47

**Supplementary table S3. Suggested policies, interventions and reported outcomes**

| Intervention                                       | Outcome                                                                                                                                                                                                           |
|----------------------------------------------------|-------------------------------------------------------------------------------------------------------------------------------------------------------------------------------------------------------------------|
| <b>Zero-tolerance policy</b>                       |                                                                                                                                                                                                                   |
| (Meloni and Austin, 2011)                          | Increased employee engagement and workplace satisfaction<br>Increased trust among victims that reports would be appropriately managed (44% to 64%)                                                                |
| (Fried et al., 2012)                               | Victims felt safer reporting incidents of bullying (67% to 84%)<br>Improved awareness of where and whom to report to (67% to 84%)<br>Reduced power abuse (43% to 30%) but no change in overall mistreatment rates |
| <b>Bullying workshops</b>                          |                                                                                                                                                                                                                   |
| (Benmore et al., 2018)                             | Increased willingness to try to repair the harm caused by bullying and became more conscious of giving feedback                                                                                                   |
| (Kulaylat et al., 2016)*, USA)                     | Data not provided                                                                                                                                                                                                 |
| (Cresswell et al., 2016)*                          | Data not provided                                                                                                                                                                                                 |
| (Oku et al., 2014)*                                | Data not provided                                                                                                                                                                                                 |
| <b>Tracking and reporting mistreatment data</b>    |                                                                                                                                                                                                                   |
| (House et al., 2018)                               | Decreased unprofessional or disrespectful behaviour by faculty as reported by students [4.8% (2015-16) to 1.7% (2016-17)]                                                                                         |
| (Gan and Snell, 2014)                              | No difference in mistreatment                                                                                                                                                                                     |
| (Mavis et al., 2014)*                              | Data not provided                                                                                                                                                                                                 |
| <b>Staff education on formal reporting process</b> |                                                                                                                                                                                                                   |
| (Fried et al., 2012)                               | No change in reporting rate                                                                                                                                                                                       |
| (Al-Shafae, 2013)*                                 | Data not provided                                                                                                                                                                                                 |
| (Imran et al., 2010)*                              | Data not provided                                                                                                                                                                                                 |

1  
2  
3 (Wear et al., 2005)\* Data not provided

4 (Scott et al., 2008)\* Data not provided

5 **Develop a committee to handle reporting**

6 (Best et al., 2010) Resolutions reached 96% of formal reports

7 (Gadit et al., 2007)\* Data not provided

8 (Kapoor et al., 2016)\* Data not provided

9  
10  
11 

---

\*Suggested approach that had not been implemented



Central illustration: The definition, impact, victims, bullies, and contributing factors of academic bullying in medicine

1  
2  
3  
4  
5  
6  
7  
8  
9  
10  
11  
12  
13  
14  
15  
16  
17  
18  
19  
20  
21  
22  
23  
24  
25  
26  
27  
28  
29  
30  
31  
32  
33  
34  
35  
36  
37  
38  
39  
40  
41  
42  
43  
44  
45  
46  
47  
48  
49  
50  
51  
52  
53  
54  
55  
56  
57  
58  
59  
60



Figure 1: The flow diagram of included studies  
We included 44 studies in this review. Reasons for exclusion are described at each stage of study selection.

2195x2212mm (72 x 72 DPI)



**Supplementary figure S1: Search strategy**

1. Exp bullying
2. Exp medicine
3. Exp hospitals
4. (sabotage or mistreat\* or discredit or humiliation or harassment or demean or bully\* or belittle or intimidate or disrespect or coerce or ignore or undermine or exclude or libel or slander or criticism or overwork\*).ti
5. (Workplace or career or professional or academic or promotion\* or employment or job or profession or reputation or academia).mp
6. (medicine or residency\* or "medical school" or "clinical training" or hospital or internship or fellow\* or "junior doctor" or "house officer" or "clinical clerk" or "attending physician" or physician or doctor or clinician or hierarchical system or "clinician-scientist" or learner or faculty or "NHS").ti,ab.
7. Exp aggression
8. 1 or 4 or 7
9. 5 and 8
10. 2 or 3 or 6
11. 9 and 10

1  
2  
3  
4  
5  
6  
7  
8  
9  
10  
11  
12  
13  
14  
15  
16  
17  
18  
19  
20  
21  
22  
23  
24  
25  
26  
27  
28  
29  
30  
31  
32  
33  
34  
35  
36  
37  
38  
39  
40  
41  
42  
43  
44  
45  
46  
47  
48  
49  
50  
51  
52  
53  
54  
55  
56  
57  
58  
59  
60



Supplementary figure S2: The risk of bias of survey studies included in this review  
Most studies in this review had at least a moderate risk of bias. Common sources of bias included inappropriate sampling techniques and low sample sizes

|                | Study objective clearly stated | Eligibility criteria pre-specified | Sample representativeness | All eligible participants enrolled | Sample size | Intervention clearly described | Outcome measures clearly described and valid | Blinding of outcome assessors | Follow-up rate | Statistical analysis of pre-post changes | Multiple outcome measures | Group-level interventions and individual-level outcome efforts |
|----------------|--------------------------------|------------------------------------|---------------------------|------------------------------------|-------------|--------------------------------|----------------------------------------------|-------------------------------|----------------|------------------------------------------|---------------------------|----------------------------------------------------------------|
| Benmore 2018   | +                              | +                                  | +                         | -                                  | -           | +                              | +                                            | -                             | -              | -                                        | -                         | +                                                              |
| Best 2010      | -                              | +                                  | +                         | -                                  | +           | +                              | +                                            | -                             | +              | -                                        | -                         | -                                                              |
| Cresswell 2016 | -                              | -                                  | +                         | -                                  | -           | +                              | -                                            | -                             | -              | -                                        | -                         | +                                                              |
| Fried 2015     | +                              | +                                  | +                         | +                                  | +           | +                              | +                                            | -                             | +              | +                                        | -                         | +                                                              |
| House 2018     | +                              | +                                  | +                         | -                                  | -           | +                              | -                                            | -                             | +              | -                                        | -                         | -                                                              |
| Kulaylat 2016  | +                              | +                                  | +                         | +                                  | -           | +                              | +                                            | -                             | +              | +                                        | -                         | +                                                              |
| Meloni 2011    | +                              | +                                  | +                         | +                                  | +           | +                              | +                                            | -                             | -              | -                                        | -                         | -                                                              |

Supplementary figure S3: The risk of bias of before-after studies included in this review  
 Most studies in this review had at least a moderate risk of bias. Common sources of bias included lack of blinding or a control group and low sample sizes



# PRISMA 2009 Checklist

| Section/topic                      | #  | Checklist item                                                                                                                                                                                                                                                                                              | Reported on page # |
|------------------------------------|----|-------------------------------------------------------------------------------------------------------------------------------------------------------------------------------------------------------------------------------------------------------------------------------------------------------------|--------------------|
| <b>TITLE</b>                       |    |                                                                                                                                                                                                                                                                                                             |                    |
| Title                              | 1  | Identify the report as a systematic review, meta-analysis, or both.                                                                                                                                                                                                                                         | 1                  |
| <b>ABSTRACT</b>                    |    |                                                                                                                                                                                                                                                                                                             |                    |
| Structured summary                 | 2  | Provide a structured summary including, as applicable: background; objectives; data sources; study eligibility criteria, participants, and interventions; study appraisal and synthesis methods; results; limitations; conclusions and implications of key findings; systematic review registration number. | 2                  |
| <b>INTRODUCTION</b>                |    |                                                                                                                                                                                                                                                                                                             |                    |
| Rationale                          | 3  | Describe the rationale for the review in the context of what is already known.                                                                                                                                                                                                                              | 4                  |
| Objectives                         | 4  | Provide an explicit statement of questions being addressed with reference to participants, interventions, comparisons, outcomes, and study design (PICOS).                                                                                                                                                  | 4-5                |
| <b>METHODS</b>                     |    |                                                                                                                                                                                                                                                                                                             |                    |
| Protocol and registration          | 5  | Indicate if a review protocol exists, if and where it can be accessed (e.g., Web address), and, if available, provide registration information including registration number.                                                                                                                               | N/A                |
| Eligibility criteria               | 6  | Specify study characteristics (e.g., PICOS, length of follow-up) and report characteristics (e.g., years considered, language, publication status) used as criteria for eligibility, giving rationale.                                                                                                      | 5-6                |
| Information sources                | 7  | Describe all information sources (e.g., databases with dates of coverage, contact with study authors to identify additional studies) in the search and date last searched.                                                                                                                                  | 5                  |
| Search                             | 8  | Present full electronic search strategy for at least one database, including any limits used, such that it could be repeated.                                                                                                                                                                               | 5                  |
| Study selection                    | 9  | State the process for selecting studies (i.e., screening, eligibility, included in systematic review, and, if applicable, included in the meta-analysis).                                                                                                                                                   | 5-6                |
| Data collection process            | 10 | Describe method of data extraction from reports (e.g., piloted forms, independently, in duplicate) and any processes for obtaining and confirming data from investigators.                                                                                                                                  | 6                  |
| Data items                         | 11 | List and define all variables for which data were sought (e.g., PICOS, funding sources) and any assumptions and simplifications made.                                                                                                                                                                       | 6                  |
| Risk of bias in individual studies | 12 | Describe methods used for assessing risk of bias of individual studies (including specification of whether this was done at the study or outcome level), and how this information is to be used in any data synthesis.                                                                                      | 6                  |
| Summary measures                   | 13 | State the principal summary measures (e.g., risk ratio, difference in means).                                                                                                                                                                                                                               | 7                  |
| Synthesis of results               | 14 | Describe the methods of handling data and combining results of studies, if done, including measures of consistency (e.g., $I^2$ ) for each meta-analysis.                                                                                                                                                   | 7                  |



# PRISMA 2009 Checklist

| Section/topic                 | #  | Checklist item                                                                                                                                                                                           | Reported on page # |
|-------------------------------|----|----------------------------------------------------------------------------------------------------------------------------------------------------------------------------------------------------------|--------------------|
| Risk of bias across studies   | 15 | Specify any assessment of risk of bias that may affect the cumulative evidence (e.g., publication bias, selective reporting within studies).                                                             | N/A                |
| Additional analyses           | 16 | Describe methods of additional analyses (e.g., sensitivity or subgroup analyses, meta-regression), if done, indicating which were pre-specified.                                                         | 6-7                |
| <b>RESULTS</b>                |    |                                                                                                                                                                                                          |                    |
| Study selection               | 17 | Give numbers of studies screened, assessed for eligibility, and included in the review, with reasons for exclusions at each stage, ideally with a flow diagram.                                          | 7                  |
| Study characteristics         | 18 | For each study, present characteristics for which data were extracted (e.g., study size, PICOS, follow-up period) and provide the citations.                                                             | 7                  |
| Risk of bias within studies   | 19 | Present data on risk of bias of each study and, if available, any outcome level assessment (see item 12).                                                                                                | 14-15              |
| Results of individual studies | 20 | For all outcomes considered (benefits or harms), present, for each study: (a) simple summary data for each intervention group (b) effect estimates and confidence intervals, ideally with a forest plot. | 8-14               |
| Synthesis of results          | 21 | Present results of each meta-analysis done, including confidence intervals and measures of consistency.                                                                                                  | N/A                |
| Risk of bias across studies   | 22 | Present results of any assessment of risk of bias across studies (see Item 15).                                                                                                                          | N/A                |
| Additional analysis           | 23 | Give results of additional analyses, if done (e.g., sensitivity or subgroup analyses, meta-regression [see Item 16]).                                                                                    | 9-12               |
| <b>DISCUSSION</b>             |    |                                                                                                                                                                                                          |                    |
| Summary of evidence           | 24 | Summarize the main findings including the strength of evidence for each main outcome; consider their relevance to key groups (e.g., healthcare providers, users, and policy makers).                     | 15-18              |
| Limitations                   | 25 | Discuss limitations at study and outcome level (e.g., risk of bias), and at review-level (e.g., incomplete retrieval of identified research, reporting bias).                                            | 18-19              |
| Conclusions                   | 26 | Provide a general interpretation of the results in the context of other evidence, and implications for future research.                                                                                  | 19-20              |
| <b>FUNDING</b>                |    |                                                                                                                                                                                                          |                    |
| Funding                       | 27 | Describe sources of funding for the systematic review and other support (e.g., supply of data); role of funders for the systematic review.                                                               | 20                 |

From: Moher D, Liberati A, Tetzlaff J, Altman DG, The PRISMA Group (2009). Preferred Reporting Items for Systematic Reviews and Meta-Analyses: The PRISMA Statement. PLoS Med 6(7): e1000097. doi:10.1371/journal.pmed1000097

For more information, visit: [www.prisma-statement.org](http://www.prisma-statement.org).

# BMJ Open

## A systematic review of academic bullying in medical settings: behaviours, perpetrators, victims, and consequences

|                                 |                                                                                                                                                                                                                                   |
|---------------------------------|-----------------------------------------------------------------------------------------------------------------------------------------------------------------------------------------------------------------------------------|
| Journal:                        | <i>BMJ Open</i>                                                                                                                                                                                                                   |
| Manuscript ID                   | bmjopen-2020-043256.R1                                                                                                                                                                                                            |
| Article Type:                   | Original research                                                                                                                                                                                                                 |
| Date Submitted by the Author:   | 01-Dec-2020                                                                                                                                                                                                                       |
| Complete List of Authors:       | Averbuch, Tauben; McMaster University, Medicine<br>Eliya, Yousif; McMaster University, Health Research Methodology<br>Van Spall, Harriette Gillian Christine; Population Health Research Institute; McMaster University, Medicine |
| <b>Primary Subject Heading</b>: | Medical education and training                                                                                                                                                                                                    |
| Secondary Subject Heading:      | Occupational and environmental medicine                                                                                                                                                                                           |
| Keywords:                       | MEDICAL EDUCATION & TRAINING, GENERAL MEDICINE (see Internal Medicine), HEALTH SERVICES ADMINISTRATION & MANAGEMENT                                                                                                               |
|                                 |                                                                                                                                                                                                                                   |

SCHOLARONE™  
Manuscripts



I, the Submitting Author has the right to grant and does grant on behalf of all authors of the Work (as defined in the below author licence), an exclusive licence and/or a non-exclusive licence for contributions from authors who are: i) UK Crown employees; ii) where BMJ has agreed a CC-BY licence shall apply, and/or iii) in accordance with the terms applicable for US Federal Government officers or employees acting as part of their official duties; on a worldwide, perpetual, irrevocable, royalty-free basis to BMJ Publishing Group Ltd ("BMJ") its licensees and where the relevant Journal is co-owned by BMJ to the co-owners of the Journal, to publish the Work in this journal and any other BMJ products and to exploit all rights, as set out in our [licence](#).

The Submitting Author accepts and understands that any supply made under these terms is made by BMJ to the Submitting Author unless you are acting as an employee on behalf of your employer or a postgraduate student of an affiliated institution which is paying any applicable article publishing charge ("APC") for Open Access articles. Where the Submitting Author wishes to make the Work available on an Open Access basis (and intends to pay the relevant APC), the terms of reuse of such Open Access shall be governed by a Creative Commons licence – details of these licences and which [Creative Commons](#) licence will apply to this Work are set out in our licence referred to above.

Other than as permitted in any relevant BMJ Author's Self Archiving Policies, I confirm this Work has not been accepted for publication elsewhere, is not being considered for publication elsewhere and does not duplicate material already published. I confirm all authors consent to publication of this Work and authorise the granting of this licence.

1  
2  
3 **A systematic review of academic bullying in medical settings: behaviours, perpetrators, victims, and consequences**  
4

5 Averbuch T<sup>a</sup>, Yousif E<sup>b</sup>, Van Spall HGC<sup>a, b, c</sup>  
6

7  
8 **Corresponding author:** Harriette Gillian Christine Van Spall. Harriette.vanspall@phri.ca. 237 Barton Street East, Hamilton, ON L8L  
9  
10 2X2, Canada. Telephone: 905-521-2100 Ext: 40601 Fax: 905-538-8932  
11

12 <sup>a</sup>Department of Medicine, McMaster University, Hamilton, Ontario; <sup>b</sup>Department of Health Research Methods, Evidence, and Impact,  
13  
14 McMaster University, Hamilton, Ontario; <sup>c</sup>Population Health Research Institute, Hamilton, Ontario  
15

16  
17 **Word count: 4213**  
18  
19  
20  
21  
22  
23  
24  
25  
26  
27  
28  
29  
30  
31  
32  
33  
34  
35  
36  
37  
38  
39  
40  
41  
42

43 1  
44  
45  
46  
47



## ABSTRACT

**Purpose:** To characterize the dynamics and consequences of bullying in academic medical settings.

**Design:** Systematic review.

**Data sources:** We searched EMBASE and PsycINFO for articles published between January 1, 1999 and June 24, 2018.

**Study selection:** We included studies conducted in academic medical settings in which victims were either consultants or trainees, and described bullying behaviours; the perpetrators or victims; the impact, and/or interventions. Study characteristics, quality, and data were assessed independently by 2 reviewers.

**Results:** We included 44 studies representing 36,262 consultants and trainees. We defined academic bullying as the abuse of authority in an academic setting through punishing behaviours that include overwork, destabilization, and isolation. Of 25,639 individuals (in 19 studies) who responded about bullying patterns, the most common (38.2% of respondents) was overwork. Of 9,181 individuals (20 studies) who reported the impact, the most common was psychologic distress (40.4%). Among bullies identified by 11,006 individuals (16 studies), consultants (55.1%) were most common. Of 6,923 victims who reported gender (17 studies), the majority were women (52.3%). Among 6,930 victims (in 15 studies) who described their response, 32.8% filed a report and most (52.3%) did not perceive a positive outcome. Studies that tested the effect of interventions to mitigate bullying had high risk of bias.

1  
2  
3 **Conclusions:** Academic bullying commonly involves overwork, and is perceived as having a negative impact on well-being.  
4  
5 Perpetrators were commonly male consultants and victims were commonly women. Only a minority of victims filed a report.  
6  
7 Methodologically robust trials of anti-bullying interventions are needed.  
8  
9

10 **Limitations:** Most studies (27/44) had at least a moderate risk of bias. All interventions were uncontrolled before-after studies.  
11

12 **Keywords:** Medical Education & Training, General Medicine, Health Services Administration & Management  
13  
14  
15  
16

### 17 **Strengths and limitations**

18

- 19 • This review is comprehensive, including 44 studies with 36,262 consultants and trainees, across several countries and  
20 including all levels of training.  
21
- 22 • We explicitly defined inclusion criteria, and used established tools to assess the risk of bias of included studies  
23
- 24 • The included studies varied in their definitions of bullying, sampling bias was noted among the surveys, and intervention  
25  
26  
27  
28  
29  
30  
31  
32  
33  
34  
35  
36  
37  
38  
39  
40  
41  
42  
43  
44  
45  
46  
47

## Background

Bullying behaviours have been described as repeated attempts to discredit, destabilize, or instill fear in an intended target<sup>1</sup>. Bullying can take many forms from overt abuse to subtle acts that erode the confidence, reputation, and progress of the victim<sup>2</sup>. Bullying is common in medicine, likely impacting mental health, professional interactions, and career advancement<sup>3-6</sup>. It may also impact a physician's ability to care for patients<sup>7</sup>. Surveys from the National Health Service (NHS) in the United Kingdom showed that 55% of staff experienced at least one type of bullying; 31% were doctors in training<sup>8</sup>. Bullying is closely related to harassment and discrimination, in which mistreatment is based on personal characteristics or a protected class such as sex or race<sup>9</sup>. Within academic settings, victims may experience all three and the distinction may be less clear. Unlike harassment and discrimination, which have specific legal definitions, bullying is an amorphous term whose victims are often left without legal recourse.

The hierarchical structure of academic medicine – in which there are power imbalances, subjective criteria for recruitment and career advancement, and siloed departments with few checks in place for toxic behaviours – may offer an operational environment in which bullying may be more widespread than in non-academic medical settings. Academic bullying is a seldom-used term within the literature, but is intended to describe the forms of bullying that may exist in academic settings. The prevalence of academic bullying in medical settings is unknown likely due to a lack of definition of bullying behaviours, a fear of reporting, and insufficient research. There is not much known about the characteristics of perpetrators and victims, and about the impact of bullying on academic

1  
2  
3 productivity, career growth, and patient care. Furthermore, institutional barriers and facilitators of bullying behavior have not been  
4  
5 reported, and the effectiveness of interventions in addressing academic bullying have not been evaluated.  
6  
7

8  
9  
10 The purpose of this systematic review is to define and classify patterns of academic bullying in medical settings; assess the  
11 characteristics of perpetrators and victims; describe the impact of bullying on victims; review institutional barriers and facilitators of  
12 bullying; and identify possible solutions.  
13  
14  
15  
16  
17  
18

## 19 **Methods**

### 20 **Data sources and searches**

21  
22 This study follows PRISMA reporting guidelines. Two reviewers (T.A, Y.E.) searched two online databases (EMBASE and  
23 PsycINFO) for English-language articles published between January 1, 1999, to June 24, 2018 and relevant to academic bullying in  
24 medicine. An outline of the search is provided in Figure 1. A combination of medical subject heading (MeSH), title, and abstract text  
25 terms encompassing “Medicine”; “Bullying“ and “Academia” were used for the full search. The terms of the search are included in  
26 Supplementary figure S1. Two authors (T.A, Y.E.) independently screened articles for inclusion. Differences were resolved by  
27 discussion, and if necessary, by a third author (H.V.).  
28  
29  
30  
31  
32  
33  
34  
35  
36  
37  
38  
39  
40  
41  
42  
43  
44  
45  
46  
47

## Study selection

We included studies conducted in academic medical settings in which victims were either consultants or trainees. We defined academic medical settings as hospitals or clinics that were either university-affiliated or involved trainees. In the case of pre-clinical medical students, academic medical settings included the university where medical instruction took place. Studies were included if they described: the method and impact of bullying; the characteristics of perpetrators and victims; or interventions used to address the bullying. Studies that included trainees or consultants in both academic and non-academic settings were included. We excluded editorials, opinion pieces, reviews, conference abstracts, theses, dissertations, and grey literature. For the purposes of study selection, academic bullying was defined as mistreatment in academic institutions with the intention or effect of disrupting the academic or career progress of the victim.

## Data extraction and quality assessment

Two reviewers (T.A, Y.E.) independently extracted data on: study design, setting (academic or non-academic), definition, description and impact of academic bullying, characteristics of perpetrators and victims, barriers and facilitators of bullying, and interventions and their outcomes. Two reviewers independently assessed studies for risk of bias. We assessed before-after studies using the National Heart, Lung, and Blood Institute quality assessment tool<sup>10</sup> and assessed prevalence surveys using the Joanna Briggs Institute critical appraisal tool<sup>11</sup>. We classified survey studies as low risk of bias if at least 8 of 9 criteria were met, medium risk of

1  
2  
3 bias if 7 of 9 were met, and high risk of bias if less than 7 were met. We classified before-after studies as low risk of bias if at least 11  
4  
5 of 12 criteria were met, medium risk of bias if at least 9 of 12 were met, and high risk of bias if less than 9 were met.  
6  
7

### 8 9 10 **Data synthesis and analysis**

11  
12 We pooled the results of surveys on the basis of similarity of survey themes to facilitate a descriptive analysis. For survey  
13  
14 studies on the prevalence or impact of bullying, we solely pooled the results of studies that asked respondents about specific bullying  
15  
16 behaviours or impacts, respectively. We then separated results by sex and level of training. Group selection was by consensus between  
17  
18 authors. We presented our results as numbers and percentages. We calculated the denominators from the total number of individuals  
19  
20 who completed surveys on types of bullying behaviours, the impact of bullying, characteristics of bullies and victims, or barriers to  
21  
22 addressing academic bullying. The numerators were calculated from the number of individuals who experienced a specific behaviour  
23  
24 or impact, were bullied by a perpetrator at a specified level of training, or endorsed a specific reason for not making a formal report.  
25  
26 We also reported the number of studies that described each specific bullying behaviour or impact, demographic characteristics of  
27  
28 victims and perpetrators, barriers and facilitators of academic bullying, and specific reasons for not making a formal report. We could  
29  
30 not perform a meta-analysis due to the conceptual heterogeneity between studies.  
31  
32  
33  
34  
35  
36  
37

### 38 **Patient and public involvement**

39  
40 Patients or the public were not involved in the design, conduct, reporting, or dissemination plans of our research.  
41  
42

43 7

## Results

### Screening results

We identified 933 unique articles, 44 of which met inclusion criteria. Reasons for exclusion are described in Figure 1.

### Characteristics of included studies

Studies were most frequently set in the USA (reported in 13 studies)<sup>3,12-22</sup> and the UK (reported in 5 studies)<sup>8,23-26</sup> and were set in academic hospitals (reported in 36 studies)<sup>1,3-5,12-16,18-20,22-45</sup> or in both teaching and non-teaching sites (reported in 8 studies)<sup>8,17,21,46-49</sup>. Sixteen studies included medical students<sup>3-5,12,14-16,18,20,30,32,35,39-42</sup>, 12 included residents or fellows<sup>1,13,25,26,31-34,36,37,43,44</sup> and 17 included consultants<sup>6,8,17,19,21-24,28,29,33,38,45-49</sup> (Table 1).

### Definition of academic bullying

Four papers provided definitions for academic bullying<sup>30,32,37,40</sup>. Common themes included behaviours where the perpetrator abuses authority to punish the victim through isolation, blocked career advancement, and threats to academic standing. We defined academic bullying as the abuse of authority by a perpetrator who targets the victim in an academic setting through punishing behaviours that include overwork, destabilization, and isolation. Multiple studies used the complete or partial Negative Acts Questionnaire (NAQ), a standardized list of bullying behaviours (reported in 22 studies)<sup>1,3,4,6,12-15,17,27,29-32,34-36,39,42,43,47,49</sup>.

### Patterns of academic bullying behaviours

There were 25,639 consultant and trainee respondents to surveys of bullying behaviours (reported in 19 studies), but not all were offered the same options to select from (Table 2). Bullying behaviours were grouped into destabilization (reported in 13 studies), threats to professional status (reported in 15 studies), overwork (reported in 7 studies), and isolation (reported in 13 studies). Undue pressure to produce work was commonly reported (38.2% of respondents affected, reported in 7 studies)<sup>13,17,26,27,29,31,49</sup>. Of the 13 studies that described destabilization, common methods included being ordered to work below one's competency level (35.7%, reported in 9 studies)<sup>17,26,29-31,33,35,38,49</sup> and withholding information that affects performance (29.1%; reported in 7 studies)<sup>13,17,27,29-31,49</sup>. Of the 15 studies that described threats to professional status, common methods were excessive monitoring (28.8%; reported in 6 studies)<sup>13,17,27,29,31,49</sup> and criticism (24.9%; reported in 10 studies)<sup>13,17,26,27,29,31,33,35,38,49</sup>. Of the 13 studies that described isolation, the most common method was social and professional exclusion (26.9%; reported in 13 studies)<sup>4,13,15,17,21,27,29-31,33,35,46,49</sup>.

There were 3,564 consultant and trainee respondents to surveys that separated the prevalence of bullying behaviours by sex (reported in 6 studies). A greater proportion of men experienced the intimidatory use of discipline procedures (18.5%, reported in 5 studies)<sup>13,17,30,35,39</sup> while a greater proportion of women experienced all other bullying behaviours (reported in 6 studies)<sup>13,17,21,30,35,39</sup> (Table 2). There were 24,876 respondents to surveys that analyzed results by level of training (reported in 17 studies) (Supplementary table S1). A greater proportion of consultants experienced refusal of applications for leave, training, or promotion (25.7%, reported in 2 studies)<sup>17,29</sup> and removal of areas of responsibility (27.8%, reported in 2 studies)<sup>17,29</sup> than residents (11.7%, reported in 2 studies;



1  
2  
3 10.7%, reported in 3 studies, respectively)<sup>13,27,36</sup> or medical students (not reported; 19.6%, reported in 1 study, respectively)<sup>15</sup>.  
4  
5 Compared to medical students (4.2%, reported in 5 studies)<sup>12,14,15,35,39</sup> and consultants (3.4%, reported in 2 studies)<sup>17,38</sup>, a greater  
6  
7 proportion of residents experienced the intimidatory use of discipline procedures (21.1%, reported in 4 studies)<sup>13,27,30,36</sup>. A greater  
8  
9 proportion of medical students experienced persistent criticism (71.4%, reported in 1 study)<sup>35</sup> than residents (26.3%, reported in 4  
10  
11 studies)<sup>13,26,27,33</sup> and consultants (20.8%, reported in 3 studies)<sup>17,29,38</sup>.  
12  
13  
14  
15  
16

### 17 **Characteristics of bullies**

18  
19 Twenty-two studies representing 11,006 consultants and trainees described the characteristics of bullies, although not all were  
20  
21 offered the same options to select from. Common perpetrators included consultants (55.9%, reported in 22  
22  
23 studies)<sup>1,3,4,6,8,13,14,18,21,24,26,27,29-31,33,35,37,42,44,47,48</sup>, residents (21.6%, reported in 14 studies)<sup>1,3,6,8,14,18,26,27,30,31,37,42,44</sup>, and nurses (14.3%,  
24  
25 reported in 14 studies)<sup>1,3,4,13,14,18,26,27,30,31,37,42,44,47</sup>. Of the 4,277 individuals who identified the gender of their bullies, most reported  
26  
27 primarily male (67.2%, reported in 5 studies)<sup>8,17,24,29,33</sup>, followed by primarily female (26.1%, reported in 5 studies)<sup>8,17,24,29,33</sup>, and both  
28  
29 (6.7%, reported in 3 studies)<sup>8,24,29</sup>. Among 5,444 medical students, perpetrators were commonly consultants (45.2%, reported in 6  
30  
31 studies)<sup>3,4,14,18,35,42</sup>, residents (37.6%, reported in 4 studies)<sup>3,14,18,42</sup>, nurses (12.8%, reported in 5 studies)<sup>3,4,14,18,42</sup>, and other medical  
32  
33 students (4.4%, reported in 3 studies)<sup>3,4,35</sup>. Among 2,980 residents, perpetrators were commonly consultants (51.0%, reported in 8  
34  
35 studies)<sup>1,13,26,27,30,31,37,44</sup>, nurses (29.2%, reported in 8 studies)<sup>1,13,26,27,30,31,37,44</sup>, and other residents (16.4%, reported in 8  
36  
37  
38  
39  
40  
41  
42  
43  
44  
45  
46  
47

1  
2  
3 studies)<sup>1,13,26,27,30,31,37,44</sup>. Of the 1,500 consultants, perpetrators were their peers (39.2%, reported in 7 studies)<sup>6,8,21,29,31,47,48</sup>, senior  
4  
5 consultants (23.7%, reported in 5 studies)<sup>6,8,21,24,47</sup>, and administration (17.7%, reported in 4 studies)<sup>24,29,31,48</sup>.  
6  
7  
8  
9

10 Six studies representing 1,258 interns and medical students described the prevalence of academic bullying according to the  
11 specialty rotation of the learner. Academic bullying was common in surgery (34.9% of respondents, reported in 5 studies)<sup>1,12,30,33,37,42</sup>,  
12 obstetrics and gynecology (25.5%, reported in 2 studies)<sup>12,42</sup> and internal medicine (21.4%, reported in 5 studies)<sup>1,12,30,33,37,42</sup>.  
13  
14  
15  
16  
17  
18

### 19 **Characteristics of victims**

20  
21 Twenty-five studies described the characteristics of victims, and 19 included the proportion of those who experienced bullying.  
22  
23 Of the 6,689 women and 9,162 men who responded to surveys that analyzed results by sex, women were more likely to report being  
24 bullied than men (54.1% of all women compared to 36.1% of all men, reported in 17 studies)<sup>3,4,13,17,19,22,29–37,39,44</sup>. There were 8,454  
25  
26 consultant and trainee respondents to surveys that separated the results by demographic characteristics other than sex, but not all  
27 characteristics were captured by each study. A greater proportion of international graduates / non-citizens experienced bullying than  
28 citizens (55.2% compared to 50.6%, reported in 3 studies)<sup>13,26,33</sup>, and a greater proportion of overweight participants (BMI >25)  
29 experienced bullying than those with a BMI ≤25 (17.8% compared to 11.8%, reported in 1 study)<sup>34</sup>. The relationship between age and  
30 bullying varied based on the cutoff used and the survey sample in each study. Among consultants, a greater proportion of those with  
31 full professorship experienced bullying than assistant professors (68.0% compared to 51.9%, reported in 1 study)<sup>22</sup>.  
32  
33  
34  
35  
36  
37  
38  
39  
40  
41  
42  
43  
44  
45  
46  
47

### Impact of academic bullying

There were 9,181 consultant and trainee respondents to surveys on the psychological (reported in 12 studies) and career impact (reported in 16 studies) of academic bullying (Table 3), although not all were offered the same options to select from. Respondents commonly reported psychiatric distress (40.4%; reported in 9 studies)<sup>6,24,29,35,37,38,41,44,47</sup>, considerations of quitting (37.8%; reported in 5 studies)<sup>24,29,33,46,48</sup>, and reduced clinical ability (29.3%; reported in 5 studies)<sup>26,29,35,37,41</sup>. No studies quantified the effect on patient safety. Five studies representing 2,688 individuals described the impact of bullying separated by sex (Table 3). A greater proportion of women experienced loss of career opportunities (23.4%, reported in 5 studies)<sup>17,19,21,22,35</sup> while a greater proportion of men experienced decreased confidence (32.1%, reported in 2 studies)<sup>22,35</sup> and clinical ability (26.1%, reported in 1)<sup>35</sup>.

There were 8,545 consultant and trainee respondents to surveys that separated results by level of training (Supplementary table S2). A greater proportion of medical students experienced psychiatric distress (72.9%, reported in 2 studies)<sup>35,41</sup> and decreased clinical performance (34.9%, reported in 2 studies)<sup>35,41</sup> than residents (48.2%, reported in 2 studies and 17.2%, reported in 1 study, respectively)<sup>37,44</sup> and consultants (17.9%, reported in 4 studies and 9.1%, reported in 1 study, respectively)<sup>24,29,38,47</sup>. A greater proportion of residents endorsed loss of career opportunities (36.2%, reported in 2 studies)<sup>33,36</sup> compared to medical students (16.0%, reported in 3 studies)<sup>12,14,35</sup> and consultants (23.7%, reported in 7 studies)<sup>17,19,21,22,29,38,46</sup>.

### Barriers and facilitators of academic bullying

Eighteen studies pertained to barriers to victims making a formal report (reported in 15 studies) and institutional facilitators (reported in 14 studies) of academic bullying (Table 4). There were 6,930 consultant and trainee respondents to surveys on their actions taken in response to bullying and reasons for not making a formal report, although not all were given the same options to select from. Victims commonly did not make a formal report<sup>1,3,4,14,17,24,27,29,31-33,37,42,44,48</sup>; only 32.8% made a formal report. Deterrents to reporting included concern regarding career implications (37.7%, reported in 12 studies)<sup>1,4,14,16,29,30,32,33,37,44,46,48</sup>, not knowing who to report to (31.9%, reported in 9 studies)<sup>1,4,29,30,32,37,44,46,48</sup>, and poor recognition of bullying (13.4%, reported in 7 studies)<sup>5,14,16,18,23,30,37</sup>. Of the 15 studies, 6 studies representing 1139 individuals reported the outcomes of reporting<sup>1,17,24,29,31,33</sup> although only a small range of outcomes were offered among options. Submitting a formal report often had no perceived effect on bullying (35.6%, reported in 5 studies)<sup>17,24,29,31,33</sup> a similar proportion of victims endorsed worsening (16.7%, reported in 2)<sup>17,31</sup> and improvement (13.7%, reported in 5 studies)<sup>1,17,24,31,33</sup> in bullying following reporting.

In the 11 studies that described institutional facilitators of bullying, common facilitators were lack of enforcement (reported in 8 studies)<sup>1,17,24,27,29,31,32,37</sup>, the hierarchical structure of medicine (reported in 4 studies)<sup>27,37-39</sup>, normalization of bullying (reported in 4 studies)<sup>3,14,29,44</sup> and lack of a formal reporting process (reported in 2 studies)<sup>4,36</sup>. Individual-level data was not pooled as institutional facilitators of bullying were most commonly elicited via free-response portions of surveys with varying completion rates.

### Suggested strategies, interventions, and outcomes

Thirty-two studies suggested strategies to address academic bullying. These strategies included promoting anti-bullying policies (reported in 13 studies)<sup>2,8,41,46,10,11,17,19,26,28,32,39</sup>, education to prevent academic bullying (reported in 13 studies)<sup>2,3,46,48,4,12,13,20,24,25,28,31</sup>, establishing an anti-bullying oversight committee (reported in 5 studies)<sup>2,15,17,35</sup>, institutional support for victims (reported in 2 studies)<sup>10,41</sup>, and internal reviews where hospitals develop targeted solutions for their environment (reported in 2 studies)<sup>15,46</sup> (Supplementary table S3).

Of the 32 studies, 7 implemented organization-level interventions which included workshops with vignettes to improve recognition of bullying (reported in 3 studies)<sup>18,23,25</sup>; a gender and power abuse committee that established reporting mechanisms and held mandatory workshops on mistreatment (reported in 1)<sup>3</sup>; a gender equity office to handle reporting (reported in 1)<sup>20</sup>; zero-tolerance policies (reported in 1)<sup>45</sup>; and institutional-level tracking of mistreatment to provide targeted staff education (reported in 1)<sup>15</sup>. All 7 studies had an uncontrolled before-after design, and as such, did not establish causality. In the studies of vignettes, common bullying behaviours were demonstrated to improve recognition of both subtle and overt acts of bullying. Of the 3 studies that involved bullying recognition workshops, all reported an associated improvement in bullying recognition. In a study that developed a gender equity office, reporting was handled through an intermediary; decisions were binding with consequences for retaliation including termination of employment<sup>20</sup> and 96% of all formal reports were resolved. In a study where a Gender and Power Abuse committee was formed, there was an associated reduction in academic abuse<sup>3</sup>. In a study assessing the impact of a professionalism retreat about mistreatment

1  
2  
3 for consultants, there was no reduction in medical student mistreatment<sup>12</sup>. In a study assessing the implementation of zero-tolerance  
4 policies, there was an associated improvement in awareness of bullying reporting processes<sup>45</sup>.  
5  
6  
7

### 8 9 10 **Assessment of bias**

11  
12 Seventeen studies had a low risk of bias<sup>4,8,12,17,22,26,29,31–38,47,48</sup>, 15 had a medium risk of bias<sup>1,3,13,14,18,19,21,24,27,28,40,41,43,46,49</sup>, and  
13 12 had a high risk of bias<sup>5,6,15,16,20,23,25,30,39,42,44,45</sup>. Among the 37 survey studies, 13 sampled participants  
14 inappropriately<sup>5,6,13,16,21,27,28,30,39,40,42,44,49</sup>, 12 had inadequate sample sizes or did not justify their sample size<sup>1,5,6,16,21,28,30,32,36,38,39,42</sup>, 5  
15 did not sufficiently describe the participants<sup>1,14,16,30,40</sup>, 7 had coverage bias<sup>6,13,21,27,30,39,44</sup>, 3 did not have an appropriate statistical  
16 analysis<sup>14,16,49</sup>, and 2 had a low response rate<sup>1,5,13,14,16,17,24,26,29,31,33,35,37,39,41–44,46,48,49</sup> (Supplementary figure S2). Among the 7 before-  
17 after trials, 1 did not have pre-specified inclusion criteria<sup>25</sup>, 4 had low sample sizes or did not justify their sample size<sup>15,18,23,25</sup>, 2 did  
18 not have clearly defined, pre-specified, consistently measured outcomes<sup>15,25</sup>, 7 did not blind participants<sup>3,15,18,20,23,25,45</sup>, 3 did not  
19 account for loss to follow-up in their analysis<sup>23,25,45</sup>, and 5 lacked statistical tests to assess for significant pre- to post-intervention  
20 changes<sup>15,20,23,25,45</sup> (Supplementary figure S3).  
21  
22  
23  
24  
25  
26  
27  
28  
29  
30  
31  
32  
33

### 34 35 **Discussion**

36  
37 In this systematic review, we established a definition for academic bullying, identified common patterns of bullying, and  
38 reported the impact on victims. We defined academic bullying as the abuse of authority by a perpetrator who targets the victim in an  
39  
40  
41  
42

43 15

1  
2  
3 academic setting through punishing behaviours that include overwork, destabilization, and isolation. Victims reported that academic  
4 bullying often resulted in stalled career advancement and thoughts of leaving the position. A majority of academic bullies were senior  
5 men, and a majority of victims were women. Barriers to reporting academic bullying included fear of reprisal, perceived hopelessness,  
6 and institutional non-enforcement of anti-bullying policies. Strategies to overcome academic bullying, such as anti-bullying  
7 committees and workplace reassignment were associated with an improvement in the prevalence of bullying and resolution of formal  
8 reports (Central illustration).  
9  
10  
11  
12  
13  
14  
15  
16  
17  
18

19 Several factors contribute to the prevalence of bullying within academia<sup>50,51</sup>. The hierarchical structure lends itself to power  
20 imbalances and prevents victims from speaking out, especially when the aggressor is tenured<sup>52</sup>. The relative isolation of departments  
21 within universities allows poor behaviour to go unchecked. Furthermore, the closed networks within departments lend themselves to  
22 mobbing behaviour and causes victims to fear being blacklisted for speaking out<sup>53</sup>.  
23  
24  
25  
26  
27  
28  
29  
30

31 A lack of clarity around the definition can limit awareness and reporting<sup>32</sup>. The Graduation Questionnaire administered to all  
32 American medical students found that in years where respondents were asked if they had been bullied, the estimated prevalence was  
33 lower than when they were asked about specific bullying behaviours<sup>14</sup>. Surveys on bullying should include a list of defining  
34 behaviours to increase clarity and accuracy in responses<sup>54</sup>. Even in institutions with established reporting systems, respondents were  
35  
36  
37  
38  
39  
40  
41  
42

1  
2  
3 often unaware of how to file a report<sup>29</sup>. We found that victims of academic bullying rarely filed reports, primarily due to fear of  
4  
5 retaliation. Reporting was not consistently effective and was equally likely to worsen bullying.  
6  
7

8  
9  
10 We found that consultants were the most common sources of bullying at all levels of training, although residents often bullied  
11  
12 medical students. No studies assessed the relative contribution of fellows and senior residents to resident bullying. Among studies that  
13  
14 analyzed bullying among consultants by seniority, senior consultants were a more commonly reported source of bullying<sup>6,8,21,24,47</sup>.  
15  
16 Women and ethnic minorities reported higher rates of bullying among demographic groups surveyed, although racial factors were  
17  
18 infrequently assessed in the surveys included in this study. While some argue that the increasing proportion of women trainees<sup>55,56</sup>  
19  
20 may change dynamics in healthcare settings, the leaky academic pipeline in which women remain underrepresented in several  
21  
22 academic specialties and in positions of leadership make them vulnerable to the power dynamics of academic medicine<sup>57</sup>.  
23  
24  
25  
26  
27

28 Our review illustrates the self-reported harms of academic bullying. Victims experienced depressive symptoms, self-perceived  
29  
30 loss of clinical ability, and termination of employment. Academic bullying has been linked to depression<sup>34</sup>, substance abuse<sup>58</sup>, and  
31  
32 hospitalization for coronary artery or cerebrovascular disease<sup>59</sup>. Bullying costs the National Health Service (NHS) of the United  
33  
34 Kingdom £325 million annually due to reduced performance and increased staff turnover<sup>60</sup>. Disruptive behavior, linked to bullying in  
35  
36 the perioperative setting has been linked to 27% of patient deaths, 67% of adverse events, and 71% of medical errors<sup>7</sup>. Reasons for  
37  
38 consultant error include intimidation leading to a fear of communicating sources of harm and slow response times<sup>61</sup>.  
39  
40  
41  
42



1  
2  
3  
4  
5  
6 Interventions reported as effective were simple, non-resource intensive, and organization-level, such as anti-bullying  
7  
8 workshops and committees. Anti-bullying committees involving staff and learners can research bullying within their institution and  
9  
10 address the most common disruptive behaviours through targeted interventions<sup>49</sup>. An organization-level, rather than individual-level  
11  
12 approach may address the root causes of academic bullying as well as the organizational culture that facilitates ongoing bullying. We  
13  
14 found that anti-bullying committees typically included three elements: (1) a multidisciplinary team that includes clinicians and other  
15  
16 front-line staff; (2) development of anti-bullying policies and a reporting process; and (3) an education campaign to promote  
17  
18 awareness of policies. Owing to their multifaceted nature, it is challenging to evaluate the relative contributions of their components.  
19  
20 Furthermore, without well-designed trials, the effect of anti-bullying committees is unknown.  
21  
22  
23  
24  
25

26 The need for a confidential reporting process was raised in the studies included in this review, but few described how  
27  
28 confidentiality could be maintained when the report has to describe details of the bullying that may be only privy to the perpetrator  
29  
30 and victim. The reporting process could take the form of the Office of Gender Equity at the University of California, where the  
31  
32 accuser and the accused do not meet face to face; the discipline process is through an intermediary<sup>20</sup>. A unique, non-punitive approach  
33  
34 is the restorative justice approach used at Dalhousie University where victims, offenders, and administrators work collaboratively to  
35  
36 address sexual harassment and re-integrate offenders<sup>62</sup>. Reporting may have been ineffective in this review due to the impunity offered  
37  
38 to prominent consultants. Senior personnel, particularly those who are well-known and successful in grant funding, are often  
39  
40  
41  
42

1  
2  
3 considered “untouchable”, beyond reproach by their institutions<sup>63</sup>. Behaviour is often learned and modeling positive behaviours may  
4  
5 break the cycle of bullying in medicine<sup>64</sup>. One approach would be making professionalism a requirement for promotion and career  
6  
7 advancement, as in the Department of Medicine at the University of Toronto in Canada<sup>65</sup>.  
8  
9

### 10 11 12 **Strengths and limitations**

13  
14 The strengths of this review include its broad scope; capturing several aspects of academic bullying, and its size (n = 44  
15  
16 studies, 36,262 consultants and trainees). The cohort included was diverse, comprising several specialties and countries. We explicitly  
17  
18 defined eligibility criteria and extracted data in duplicate. We used established tools to assess the risk of bias.  
19  
20  
21  
22  
23

24 There are several limitations that should be acknowledged. There is no validated definition of bullying, and the included  
25  
26 studies varied in their description of bullying. Most studies used questionnaires that were not previously validated. The survey  
27  
28 instruments across studies differed from each other, and their results had to be pooled according to themes to be synthesized. We  
29  
30 could not account for differences in institutional culture and hospital systems in the responses of survey participants. Data on  
31  
32 bully/victim demographics were underrepresented. Selection bias was a significant concern: 13 studies used convenience sampling,  
33  
34 and 2 included voluntary focus groups for victims of bullying to sign up for. Overall, the response rate was 59.2%, with a range of  
35  
36 12% to 100%. Surrogate outcomes were used such as awareness of bullying, and the reporting of outcomes was inconsistent. As such,  
37  
38 the effect of anti-bullying interventions must be interpreted cautiously.  
39  
40  
41  
42

## Future directions

Significant gaps exist in the quality of the academic bullying literature, particularly with inconsistent definitions and limitations in study methodology. Our definition may be used to provide the breadth and granularity required to sufficiently capture cases of academic bullying in medicine. Studies on the impact of academic bullying would benefit from standardized, validated survey instruments. Although randomization and blinding are not always possible to test the effect of interventions, a control group should be included in anti-bullying intervention studies.

## Conclusions:

Academic bullying refers to specific behaviours that disrupt the learning or career of the intended target and commonly consists of exclusion and overwork. The consequences include significant psychiatric distress and loss of career opportunities. Bullies tend to be male senior consultants, whereas victims tend to be females. The fear of reprisal and non-enforcement of anti-bullying policies are the greatest barriers to addressing academic bullying. Results of bullying interventions must be interpreted with caution due to their methodological quality and reliance on surrogate measures. There is a need for well-designed trials with transparent reporting of relevant outcomes and accounting for temporal trends.

## Author contributions

20

1  
2  
3 TA contributed to study design, informed the search strategy, extracted and synthesized study data, and drafted and edited the  
4 manuscript. YE informed the search strategy, extracted and synthesized study data, and edited the manuscript. HGCV conceived the  
5 study idea, informed the search strategy, analyzed the data, drafted and edited the manuscript, and supervised the conduct of the study.  
6  
7  
8  
9  
10 HGCV affirms that the manuscript is an honest, accurate, and transparent account of the study being reported; that no important  
11 aspects of the study have been omitted; and that any discrepancies from the study as planned have been explained.  
12  
13  
14  
15  
16

### 17 **Sources of funding**

18  
19 None.  
20  
21  
22  
23

### 24 **Competing interests**

25  
26 HGCV receives support from the Canadian Institutes of Health Research, the Heart and Stroke Foundation, the Women As  
27 One Escalator Award, and McMaster Department of Medicine. All other authors have reported that they have no relationships relevant  
28 to the contents of this paper to disclose.  
29  
30  
31  
32  
33  
34

### 35 **Ethical approval**

36  
37 Not required.  
38  
39  
40  
41  
42

## Data sharing

All data relevant to the study are included in the article.

## References

1. Farquhar C, Scott J, Blanshard C, Child S, Yang C, Gray B, et al. THE NEW ZEALAND survey. 2008;121(1282):1–85.
2. Lewis D. Workplace bullying. *Body Qual Res*. 2019;42(4):91–106.
3. Fried J, Vermillion M, Parker N, Uijtdehaage S. Eradicating Medical Student Mistreatment: A Longitudinal Study of One Institution's Efforts. *Acad Med*. 2012;87(9):1191–8.
4. Oku AO, Owoaje ET, Oku OO, Monjok E. Mistreatment among undergraduate medical trainees: A case study of a Nigerian medical school. *Niger J Clin Pract*. 2014;17(6):678–82.
5. Kulaylat AN, Qin D, Sun SX, Hollenbeak CS, Schubart JR, Aboud AJ, et al. Perceptions of mistreatment among trainees vary at different stages of clinical training. *BMC Med Educ [Internet]*. 2017;17(1):1–6. Available from: <http://dx.doi.org/10.1186/s12909-016-0853-4>
6. Malinauskiene, V., Bernotaite L., Leisyte P. Bullying Behavior and Mental Health. *Med Pr*. 2017;68(3):307–14.
7. Lavelle-Jones M. Bullying and Undermining Campaign – Let's Remove it [Internet]. The Royal College of Surgeons of Edinburgh. 2017 [cited 2019 Mar 3]. p. 1–2. Available from: <https://www.rcsed.ac.uk/news-public-affairs/news/2017/june/bullying-and-undermining-campaign-let-s-remove-it>

- 1  
2  
3 8. Quine L. Workplace bullying in NHS community trust: staff questionnaire survey. *Bmj* [Internet]. 1999;318(7178):228–32.  
4  
5 Available from: <http://www.bmj.com/cgi/doi/10.1136/bmj.318.7178.228>  
6  
7
- 8 9. Okechukwu CA, Souza K, Davis KD, de Castro AB. Discrimination, Harassment, Abuse and Bullying in the Workplace:  
9  
10 Contribution of Workplace Injustice to Occupational Health Disparities. *Am J Ind Med*. 2014;57(5):573–86.  
11
- 12 10. Quality Assessment Tool for Before-After (Pre-Post) Studies With No Control Group [Internet]. National Heart, Lung, and  
13  
14 Blood Institute. Available from: <https://www.nhlbi.nih.gov/health-topics/study-quality-assessment-tools>  
15  
16
- 17 11. Checklist for Prevalence Studies [Internet]. Joanna Briggs Institute. Available from: [http://joannabriggs.org/research/critical-](http://joannabriggs.org/research/critical-appraisal-tools.html)  
18  
19 [appraisal-tools.html](http://joannabriggs.org/research/critical-appraisal-tools.html)  
20
- 21 12. Oser TK, Haidet P, Lewis PR, Mauger DT, Gingrich DL, Leong SL. Frequency and negative impact of medical student  
22  
23 mistreatment based on specialty choice: A longitudinal study. *Acad Med*. 2014;89(5):755–61.  
24  
25
- 26 13. Chadaga AR, Villines D, Krikorian A. Bullying in the American Graduate Medical Education System: A National Cross-  
27  
28 Sectional Survey. *PLoS One*. 2016;11(3):e0150246.  
29  
30
- 31 14. Mavis B, Sousa A, Lipscomb W, Rappley MD. Learning about medical student mistreatment from responses to the medical  
32  
33 school graduation questionnaire. *Acad Med*. 2014;89(5):705–11.  
34
- 35 15. House J, Griffith M, Kappy M, Holman E, Santen S. Tracking Student Mistreatment Data to Improve the Emergency Medicine  
36  
37 Clerkship Learning Environment. *West J Emerg Med* [Internet]. 2018;19(January):18–22. Available from:  
38  
39 <https://escholarship.org/uc/item/9md5263b>  
40  
41

- 1  
2  
3 16. Wear D, Aultman J. Sexual Harassment in Academic Medicine: Persistence, Non-Reporting, and Institutional Response. *Med*  
4 *Educ Online* [Internet]. 2005;10:1–11. Available from: <http://med-ed-online.net/index.php/meo/article/view/4377>  
5  
6  
7  
8 17. Rouse LP, Gallagher-Garza S, Gebhard RE, Harrison SL, Wallace LS. Workplace Bullying Among Family Physicians: A  
9 Gender Focused Study. *J Women's Heal* [Internet]. 2016;25(9):882–8. Available from:  
10 <http://online.liebertpub.com/doi/10.1089/jwh.2015.5577>  
11  
12  
13  
14 18. Kulaylat AN, Qin D, Sun SX, Hollenbeak CS, Schubart JR, Aboud AJ, et al. Aligning perceptions of mistreatment among  
15 incoming medical trainees. *J Surg Res* [Internet]. 2017;208:151–7. Available from: <http://dx.doi.org/10.1016/j.jss.2016.09.016>  
16  
17  
18  
19 19. Jagsi R, Griffith KA, Jones R, Perumalswami CR, Ubel P, Stewart A. Sexual harassment and discrimination experiences of  
20 academic medical faculty. *JAMA - J Am Med Assoc*. 2016;315(19):2120–1.  
21  
22  
23  
24 20. Best CL, Smith DW, Raymond JR, Greenberg RS, Crouch RK. Preventing and responding to complaints of sexual harassment  
25 in an academic health center: A 10-year review from the medical university of South Carolina. *Acad Med* [Internet].  
26 2010;85(4):721–7. Available from: [https://www.scopus.com/inward/record.uri?eid=2-s2.0-](https://www.scopus.com/inward/record.uri?eid=2-s2.0-77951689419&partnerID=40&md5=97e206986f1b9d460bd010dad33d83f3)  
27 [77951689419&partnerID=40&md5=97e206986f1b9d460bd010dad33d83f3](https://www.scopus.com/inward/record.uri?eid=2-s2.0-77951689419&partnerID=40&md5=97e206986f1b9d460bd010dad33d83f3)  
28  
29  
30  
31  
32  
33 21. Shrier DK, Zucker AN, Mercurio AE, Landry LJ, Rich M, Shrier LA. Generation to Generation: Discrimination and  
34 Harassment Experiences of Physician Mothers and Their Physician Daughters. *J Women's Heal* [Internet]. 2007;16(6):883–94.  
35 Available from: <http://www.liebertonline.com/doi/abs/10.1089/jwh.2006.0127>  
36  
37  
38  
39  
40 22. Carr PL, Ash AS, Friedman RH, Szalacha L, Barnett RC, Palepu A, et al. Faculty Perceptions of Gender Discrimination and  
41  
42  
43  
44  
45  
46  
47

- 1  
2  
3 Sexual Harassment in Academic Medicine. *Ann Intern Med.* 2000;132(11):889–96.  
4  
5  
6 23. Benmore G, Henderson S, Mountfield J, Wink B. The Stopit! programme to reduce bullying and undermining behaviour in  
7  
8 hospitals: Contexts, mechanisms and outcomes. *J Health Organ Manag.* 2018;32(3):428–43.  
9  
10 24. Shabazz T, Parry-Smith W, Oates S, Henderson S, Mountfield J. Consultants as victims of bullying and undermining: A survey  
11  
12 of Royal College of Obstetricians and Gynaecologists consultant experiences. *BMJ Open.* 2016;6(6).  
13  
14 25. Cresswell K, Sivashanmugarajan V, Lodhi W, Yoong W. Bullying workshops for obstetric trainees: A way forward. *Clin*  
15  
16 *Teach.* 2015;12(2):83–7.  
17  
18 26. Cheema S, Ahmad K, Naqvi SA. Bullying of Junior Doctors Prevails in Irish Health System: A Bitter Reality. *Ir Med J.*  
19  
20 2005;98(9):12–4.  
21  
22 27. Imran N, Jawaid M, Haider II, Masood Z. Bullying of junior doctors in Pakistan : A cross- sectional survey. *Singapore Med J*  
23  
24 [Internet]. 2010;51(7):592–5. Available from: <https://www.ncbi.nlm.nih.gov/pubmed/20730401>  
25  
26  
27 28. Duru P, Ocaktan ME, Çelen Ü, Örsal Ö. The Effect of Workplace Bullying Perception on Psychological Symptoms: A  
28  
29 Structural Equation Approach. *Saf Health Work.* 2018;9(2):210–5.  
30  
31 29. Chambers CNL, Frampton CMA, McKee M, Barclay M. It feels like being trapped in an abusive relationship’: Bullying  
32  
33 prevalence and consequences in the New Zealand senior medical workforce: A cross-sectional study. *BMJ Open.* 2018;8(3).  
34  
35 30. Al-Shafae M, Al-Kaabi Y, Al-Farsi Y, White G, Al-Maniri A, Al-Sinawi H, et al. Pilot study on the prevalence of abuse and  
36  
37 mistreatment during clinical internship: A cross-sectional study among first year residents in Oman. *BMJ Open.* 2013;3(2):1–7.  
38  
39  
40  
41  
42  
43  
44  
45  
46  
47



- 1  
2  
3 31. Ling M, Young CJ, Shepherd HL, Mak C, Saw RPM. Workplace Bullying in Surgery. *World J Surg*. 2016;40(11):2560–6.  
4  
5  
6 32. Ahmadipour H, Vafadar R. Why mistreatment of medical students is not reported in clinical settings: perspectives of trainees.  
7  
8 *Indian J Med Ethics* [Internet]. 2016;I(4):215–8. Available from: [http://ijme.in/articles/why-mistreatment-of-medical-students-](http://ijme.in/articles/why-mistreatment-of-medical-students-is-not-reported-in-clinical-settings-perspectives-of-trainees/?galley=html)  
9  
10 [is-not-reported-in-clinical-settings-perspectives-of-trainees/?galley=html](http://ijme.in/articles/why-mistreatment-of-medical-students-is-not-reported-in-clinical-settings-perspectives-of-trainees/?galley=html)  
11  
12 33. Crebbin W, Campbell G, Hillis DA, Watters DA. Prevalence of bullying, discrimination and sexual harassment in surgery in  
13  
14 Australasia. *ANZ J Surg*. 2015;85(12):905–9.  
15  
16 34. Loerbroks A, Weigl M, Li J, Glaser J, Degen C, Angerer P. Workplace bullying and depressive symptoms: A prospective study  
17  
18 among junior physicians in Germany. *J Psychosom Res* [Internet]. 2015;78(2):168–72. Available from:  
19  
20 <http://dx.doi.org/10.1016/j.jpsychores.2014.10.008>  
21  
22 35. Owoaje ET, Uchendu OC, Ige OK. Experiences of mistreatment among medical students in a university in south west Nigeria.  
23  
24 *Niger J Clin Pract*. 2012;15(2):214–9.  
25  
26 36. Ogunsemi OO, Alebiosu OC, Shorunmu OT. A survey of perceived stress, intimidation, harassment and well-being of resident  
27  
28 doctors in a nigerian teaching hospital. *Niger J Clin Pract*. 2010;13(2):183–6.  
29  
30 37. Nagata-Kobayashi S, Maeno T, Yoshizu M, Shimbo T. Universal problems during residency: Abuse and harassment. *Med*  
31  
32 *Educ*. 2009;43(7):628–36.  
33  
34 38. Gadit AAM, Mugford G. A pilot study of bullying and harassment among medical professionals in Pakistan, focussing on  
35  
36 psychiatry: Need for a medical ombudsman. *J Med Ethics*. 2008;34(6):463–6.  
37  
38  
39  
40  
41  
42

- 1  
2  
3 39. Rautio A, Sunnari V, Nuutinen M, Laitala M. Mistreatment of university students most common during medical studies. *BMC*  
4 *Med Educ.* 2005;5:1–12.  
5  
6  
7  
8 40. Kapoor S, Ajinkya S, Jadhav PR. Bullying and victimization trends in undergraduate medical students ??? A self-reported  
9 cross-sectional observational survey. *J Clin Diagnostic Res.* 2016;10(2):VC05–8.  
10  
11  
12 41. Peres MF, Babler F, Arakaki JN, Quaresma IY, Barreto AD, Silva AT E-NJ. Mistreatment in an academic setting and medical  
13 students' perceptions about their course in São Paulo, Brazil: a cross-sectional study. *Sao Paulo Med J.* 2016;134(2):130–7.  
14  
15  
16  
17 42. Gan R, Snell L. When the learning environment is suboptimal: Exploring medical students' perceptions of “mistreatment.”  
18 *Acad Med.* 2014;89(4):608–17.  
19  
20  
21  
22 43. Dikmetaş E, Top M, Ergin G. An examination of mobbing and burnout of residents. *Turk Psikiyat Derg.* 2011;22(3):137–49.  
23  
24  
25  
26 44. Llewellyn A, Karageorge A, Nash L, Li W, Neuen D. Bullying and sexual harassment of junior doctors in New South Wales,  
27 Australia: Rate and reporting outcomes. *Aust Heal Rev.* 2018;(September 2017).  
28  
29  
30  
31 45. Meloni M, Austin M. Implementation and outcomes of a zero tolerance of bullying and harassment program. *Aust Heal Rev.*  
32 2011;35(1):92–4.  
33  
34  
35 46. Chrysafi P, Simou E, Makris M, Malietzis G, Makris GC. Bullying and Sexual Discrimination in the Greek Health Care  
36 System. *J Surg Educ.* 2017;74(4):690–7.  
37  
38  
39 47. Malinauskiene V, Bernotaite L. Workplace bullying and posttraumatic stress symptoms among family physicians in Lithuania.  
40 *Occup Environ Med [Internet].* 2014;71(6):A113. Available from:  
41  
42  
43  
44  
45  
46  
47

- 1  
2  
3 <http://shibboleth.ovid.com/secure/?T=JS&CSC=Y&NEWS=N&PAGE=fulltext&D=emed12&AN=71745305%5Cnhttp://sfx.kc>  
4  
5 [l.ac.uk/kings?sid=OVID:embase&id=pmid:&id=doi:10.1136/oemed-2014-](http://l.ac.uk/kings?sid=OVID:embase&id=pmid:&id=doi:10.1136/oemed-2014-)  
6  
7 [102362.356&genre=article&atitle=Workplace+bullying+and+posttraumatic+stress+symptoms+a](http://102362.356&genre=article&atitle=Workplace+bullying+and+posttraumatic+stress+symptoms+a)  
8  
9  
10 48. Askew DA, Schluter PJ, Dick ML, ??go PM, Turner C, Wilkinson D. Bullying in the Australian medical workforce: Cross-  
11 sectional data from an Australian e-Cohort study. *Aust Heal Rev.* 2012;36(2):197–204.  
12  
13 49. Eriksen GS, Nygreen I, Webster RF. Bullying Among Hospital Staff: Use of Psychometric Triage to Identify Intervention  
14 Priorities. *Psychom Triage Bullying Electron J Appl Psychol.* 2011;7(2):26–31.  
15  
16 50. Wild JRL, Ferguson HJM, McDermott FD, Hornby ST, Gokani VJ. Undermining and bullying in surgical training: A review  
17 and recommendations by the Association of Surgeons in Training. *Int J Surg.* 2015;23:S5–9.  
18  
19 51. Scott KM, Caldwell PH y., Barnes EH, Barrett J. “Teaching by humiliation” and mistreatment of medical students in clinical  
20 rotations: a pilot study. *Med J Aust.* 2015;203(4):1–6.  
21  
22 52. Sharma M. Workplace Bullying: An exploratory study in Australian academia. *Grants Regist* 2020. 2019;315–6.  
23  
24 53. Khoo SB. Academic mobbing: Hidden health hazard at workplace. *Malaysian Fam Physician.* 2010;5(2):61–7.  
25  
26 54. GMC. National training survey 2014. *Gen Med Counc.* 2014;  
27  
28 55. Association of American Medical Colleges (AAMC). The Majority of U.S. Medical Students Are Women. 2019.  
29  
30 56. Jefferson L, Bloor K, Maynard A. Women in medicine: Historical perspectives and recent trends. *Br Med Bull.* 2015;  
31  
32 57. Girod S, Fassiotto M, Grewal D, Ku MC, Sriram N, Nosek BA, et al. Reducing implicit gender leadership bias in academic  
33  
34  
35  
36  
37  
38  
39  
40  
41  
42  
43  
44  
45  
46  
47

- 1  
2  
3 medicine with an educational intervention. *Acad Med.* 2016;91(8):1143–50.  
4  
5  
6 58. Niedhammer I, David S, Degioanni S, Drummond A, Philip P. Workplace bullying and psychotropic drug use: The mediating  
7  
8 role of physical and mental health status. *Ann Occup Hyg.* 2011;55(2):152–63.  
9  
10 59. Xu T, Magnusson Hanson LL, Lange T, Starkopf L, Westerlund H, Madsen IEH, et al. Workplace bullying and workplace  
11  
12 violence as risk factors for cardiovascular disease: a multi-cohort study. *Eur Heart J.* 2018;0(1):1–12.  
13  
14 60. Mistry M, Latoo J. Bullying : a growing workplace menace. *Br J Med Pract.* 2009;2(1):23–6.  
15  
16 61. Rosenstein AH. Physician disruptive behaviors: Five year progress report. *World J Clin Cases* [Internet]. 2015;3(11):930.  
17  
18 Available from: <http://www.wjgnet.com/2307-8960/full/v3/i11/930.htm>  
19  
20 62. Acosta D, Karp DR. Restorative Justice as the Rx for Mistreatment in Academic Medicine: Applications to Consider for  
21  
22 Learners, Faculty, and Staff. *Acad Med.* 2018;354–6.  
23  
24 63. Watters DAK, Hillis DJ. Discrimination, bullying and sexual harassment: Where next for medical leadership? *Med J Aust.*  
25  
26 2015;203(4):175-175e.1.  
27  
28 64. Lehmann LS, Sulmasy LS, Desai S, Ethics ACP. Annals of Internal Medicine Hidden Curricula , Ethics , and Professionalism :  
29  
30 Optimizing Clinical Learning Environments in Becoming and Being a Physician : A Position Paper of the American College of  
31  
32 Physicians. *Ann Intern Med.* 2018;168(7):506–8.  
33  
34 65. Singer H. Addressing unprofessional behaviour among physicians [Internet]. St. Michael’s Hospital. 2018 [cited 2019 Mar 2].  
35  
36 Available from: [http://stmichaelshospital.com/media/detail.php?source=hospital\\_news/2018/0730](http://stmichaelshospital.com/media/detail.php?source=hospital_news/2018/0730)  
37  
38  
39  
40  
41  
42  
43  
44  
45  
46  
47

1  
2  
3  
4  
5  
6  
7  
8  
9  
10  
11  
12  
13  
14  
15  
16  
17  
18  
19  
20  
21  
22  
23  
24  
25  
26  
27  
28  
29  
30  
31  
32  
33  
34  
35  
36  
37  
38  
39  
40  
41  
42  
43  
44  
45  
46  
47

**Table 1. Summary of studies investigating bullying in academic medicine**

| Author (year), Country              | Study design | Setting                             | Definition of academic bullying | Target                                           | Perpetrator                                                                                                                                           | Source of bias                                                                                                                                                     | Risk of Bias |
|-------------------------------------|--------------|-------------------------------------|---------------------------------|--------------------------------------------------|-------------------------------------------------------------------------------------------------------------------------------------------------------|--------------------------------------------------------------------------------------------------------------------------------------------------------------------|--------------|
| Benmore et al. (2018), England      | Before-after | Academic hospital*                  | Data not provided               | Residents                                        | Senior consultants                                                                                                                                    | Insufficient enrollment, inadequate sample size, no blinding of outcome assessors, high loss to follow-up, lack of statistical analysis or ITS <sup>†</sup> design | High         |
| Duru et al. (2018), Turkey          | Survey       | Academic hospital                   | Data not provided               | Consultants, researchers, administrators, nurses | Specific occupations of bullies not specified<br>Primarily male. Senior medical staff 52.5%, non-clinical managers 31.8%, and clinical leaders 24.9%. | Inappropriate sampling and inadequate sample size                                                                                                                  | Moderate     |
| Chambers et al. (2018), New Zealand | Survey       | Academic and non-academic hospitals | Data not provided               | Specialist consultants                           | 52.5%, non-clinical managers 31.8%, and clinical leaders 24.9%.                                                                                       | Low response rate                                                                                                                                                  | Low          |

1  
2  
3  
4  
5  
6  
7  
8  
9  
10  
11  
12  
13  
14  
15  
16  
17  
18  
19  
20  
21  
22  
23  
24  
25  
26  
27  
28  
29  
30  
31  
32  
33  
34  
35  
36  
37  
38  
39  
40  
41  
42  
43  
44  
45  
46  
47

|                                     |              |                    |                                                                                                                                                           |                    |                                                                                                          |                                                                                                                                                                                          |          |
|-------------------------------------|--------------|--------------------|-----------------------------------------------------------------------------------------------------------------------------------------------------------|--------------------|----------------------------------------------------------------------------------------------------------|------------------------------------------------------------------------------------------------------------------------------------------------------------------------------------------|----------|
| House et al. (2018), USA            | Before-after | Academic hospital  | Data not provided                                                                                                                                         | Medical Students   | Faculty most frequently were the source of bullying followed by residents. Exact breakdown not specified | Insufficient enrollment, inadequate sample size, no blinding of outcome assessors, outcomes not clearly described, lack of statistical analysis, individual-level analysis or ITS design | High     |
| Kulaylat et al. (2017), USA         | Survey       | Academic hospital  | Verbal abuse, specialty-choice discrimination, non-educational tasks, withholding/denying learning opportunities, neglect and gender/racial insensitivity | Medical Students   | Faculty (57%), residents, fellows (49%), and nurses (33%)                                                | Inappropriate sampling, inadequate sample size, classification bias, and non-validated identification or measurement of bullying                                                         | High     |
| Bernotaite et al. (2017), Lithuania | Survey       | Academic hospitals | Data not provided                                                                                                                                         | Family Consultants | 25.3% supervisor, 9.8% colleague,                                                                        | Inappropriate sampling, inadequate sample size,                                                                                                                                          | Moderate |

1  
2  
3  
4  
5  
6  
7  
8  
9  
10  
11  
12  
13  
14  
15  
16  
17  
18  
19  
20  
21  
22  
23  
24  
25  
26  
27  
28  
29  
30  
31  
32  
33  
34  
35  
36  
37  
38  
39  
40  
41  
42  
43  
44  
45  
46  
47

|                                    |        |                                     |                       |                       |                                                                                                               |                                                                       |          |
|------------------------------------|--------|-------------------------------------|-----------------------|-----------------------|---------------------------------------------------------------------------------------------------------------|-----------------------------------------------------------------------|----------|
|                                    |        |                                     |                       |                       | 2.9% subordinate                                                                                              | and coverage bias                                                     |          |
|                                    |        |                                     |                       |                       | Surgeons most frequently followed by internal medicine consultants, then radiologists/ laboratory consultants | Low response rate and coverage bias                                   | Moderate |
| Chrysafi et al. (2017), Greece     | Survey | Academic and non-academic hospitals | Data not provided     | Consultants           |                                                                                                               |                                                                       |          |
|                                    |        |                                     |                       |                       |                                                                                                               | Inappropriate sampling and inadequate description of study population | Moderate |
| Kapoor et al. (2016), India        | Survey | Academic hospital                   | Data not provided     | Medical students      | Data not provided                                                                                             | Low response rate, inadequate sample size, and coverage bias          | Moderate |
|                                    |        |                                     |                       |                       | Consultants 29%, nurses 27%, patients 23%, peers 19%                                                          |                                                                       |          |
| Chadaga et al. (2016), USA         | Survey | Academic hospitals                  | NAQ <sup>‡</sup> used | Residents and fellows |                                                                                                               | Low response rate, biased sampling, coverage and classification bias  | High     |
|                                    |        |                                     |                       |                       | Senior medical staff: 58.3% in 2015, 60.6% in 2016. Non-medical staff 33.2% 2015, 33.9% 2016, Manager 5.2%    |                                                                       |          |
| Llewellyn et al. (2016), Australia | Survey | Academic hospitals                  | Data not provided     | Residents             |                                                                                                               |                                                                       |          |

1  
2  
3  
4  
5  
6  
7  
8  
9  
10  
11  
12  
13  
14  
15  
16  
17  
18  
19  
20  
21  
22  
23  
24  
25  
26  
27  
28  
29  
30  
31  
32  
33  
34  
35  
36  
37  
38  
39  
40  
41  
42  
43  
44  
45  
46  
47

|                             |        |                                     |                                                                                                                                                                                                                                            |                             |                                                                           |                                            |          |
|-----------------------------|--------|-------------------------------------|--------------------------------------------------------------------------------------------------------------------------------------------------------------------------------------------------------------------------------------------|-----------------------------|---------------------------------------------------------------------------|--------------------------------------------|----------|
| Rouse et al. (2016), USA    | Survey | Academic clinics                    | NAQ used                                                                                                                                                                                                                                   | Family medicine consultants | Data not provided                                                         | Low response rate                          | Low      |
| Shabazz et al. (2016), UK   | Survey | Academic and non-academic hospitals | Belittle and undermine an individual's work; undermining an individual's integrity; persistent and unjustified criticism and monitoring of work; freezing out, ignoring or excluding and continual undervaluing of an individual's effort. | Gynecology consultants      | 50.9% senior consultants, 22.3% junior consultants, 4.5% medical director | Low response rate, and classification bias | Moderate |
| Peres et al. (2016), Brazil | Survey | Academic hospital                   | Data not provided                                                                                                                                                                                                                          | Medical students            | Data not provided                                                         | Low response rate, and classification bias | Moderate |



1  
2  
3  
4  
5  
6  
7  
8  
9  
10  
11  
12  
13  
14  
15  
16  
17  
18  
19  
20  
21  
22  
23  
24  
25  
26  
27  
28  
29  
30  
31  
32  
33  
34  
35  
36  
37  
38  
39  
40  
41  
42  
43  
44  
45  
46  
47

|                                |              |                    |                                                                                            |                                           |                                                                                                                                                                                                                           |                                                          |          |
|--------------------------------|--------------|--------------------|--------------------------------------------------------------------------------------------|-------------------------------------------|---------------------------------------------------------------------------------------------------------------------------------------------------------------------------------------------------------------------------|----------------------------------------------------------|----------|
| Ling et al. (2016), Australia  | Survey       | Academic hospitals | NAQ used                                                                                   | General surgery residents and consultants | For trainee victims: staff surgeon 48%, trainee surgeon 13%, admin 13%, nurses 11%, other consultant 6%<br>For consultant victims; 31% staff surgeon, 28% admin, 13% other consultant, 11% nurses, other 10%, trainees 4% | Low response rate                                        | Low      |
| Kulaylat et al. (2016), USA    | Before-after | Academic hospital  | Data not provided                                                                          | Medical Students                          | Faculty (57%), residents/fellows (49%), and nurses (33%)                                                                                                                                                                  | Inadequate sample size, no blinding of outcome assessors | Moderate |
| Ahmadipour et al. (2016), Iran | Survey       | Academic hospital  | Being assigned tasks as punishment, being threatened with an unjustly bad score or failure | Medical students, interns and residents   | Data not provided                                                                                                                                                                                                         | Inadequate sample size                                   | Low      |

1  
2  
3  
4  
5  
6  
7  
8  
9  
10  
11  
12  
13  
14  
15  
16  
17  
18  
19  
20  
21  
22  
23  
24  
25  
26  
27  
28  
29  
30  
31  
32  
33  
34  
35  
36  
37  
38  
39  
40  
41  
42  
43  
44  
45  
46  
47

|                                                  |              |                    |                   |                                                |                                                                                   |                                                                                                                                                                                                                           |          |
|--------------------------------------------------|--------------|--------------------|-------------------|------------------------------------------------|-----------------------------------------------------------------------------------|---------------------------------------------------------------------------------------------------------------------------------------------------------------------------------------------------------------------------|----------|
| Jagsi et al. (2016), USA                         | Survey       | Academic hospital  | Data not provided | Consultants who won a career advancement award | Data not provided                                                                 | Inadequate sampling frame and classification bias                                                                                                                                                                         | Moderate |
| Crebbin et al. (2015), Australia and New Zealand | Survey       | Academic hospitals | Data not provided | Residents, fellows and consultants             | 50% surgical consultants, other medical consultants (24%) and nursing staff (26%) | Low response rate                                                                                                                                                                                                         | Low      |
| Cresswell et al. (2016), UK                      | Before-after | Academic hospital  | Data not provided | Residents                                      | Data not provided                                                                 | Insufficient description of study purpose, inadequate enrollment and sample size, no blinding of outcome assessors, outcomes not clearly described, lack of statistical analysis or ITS design and high loss to follow-up | High     |
| Loerbroks et al. (2015), Germany                 | Survey       | Academic hospitals | Data not provided | Residents                                      | Data not provided                                                                 | -                                                                                                                                                                                                                         | Low      |

35

1  
2  
3  
4  
5  
6  
7  
8  
9  
10  
11  
12  
13  
14  
15  
16  
17  
18  
19  
20  
21  
22  
23  
24  
25  
26  
27  
28  
29  
30  
31  
32  
33  
34  
35  
36  
37  
38  
39  
40  
41  
42  
43  
44  
45  
46  
47

|                                        |        |                      |                                                                                                                                                                        |                             |                                                                                         |                                                                                        |          |
|----------------------------------------|--------|----------------------|------------------------------------------------------------------------------------------------------------------------------------------------------------------------|-----------------------------|-----------------------------------------------------------------------------------------|----------------------------------------------------------------------------------------|----------|
| Malinauskiene et al. (2014), Lithuania | Survey | Non-academic clinics | NAQ used                                                                                                                                                               | Family medicine consultants | Bullying from patients 11.8%, from colleagues by 8.4%, from superiors by 26.6%.         | -                                                                                      | Low      |
| Mavis et al. (2014), USA               | Survey | Academic hospitals   | Mistreatment either intentional or unintentional occurs when behavior shows disrespect for the dignity of others and unreasonably interferes with the learning process | Medical students            | Clinical faculty in the hospital (31%) residents/ interns (28%), nurses (11%)           | Low response rate, inadequate description of study population and statistical analysis | Moderate |
| Oser et al. (2014), USA                | Survey | Academic hospital    | Data not provided                                                                                                                                                      | Medical students            | Residents > clerkship faculty > other attendings > other students > preceptors = nurses | -                                                                                      | Low      |
| Oku et al. (2014), Nigeria             | Survey | Academic hospital    | Data not provided                                                                                                                                                      | Medical students            | 23.7% other students, 21.7% consultants, 17.5%                                          | -                                                                                      | Low      |

1  
2  
3  
4  
5  
6  
7  
8  
9  
10  
11  
12  
13  
14  
15  
16  
17  
18  
19  
20  
21  
22  
23  
24  
25  
26  
27  
28  
29  
30  
31  
32  
33  
34  
35  
36  
37  
38  
39  
40  
41  
42  
43  
44  
45  
46  
47

|                                     |              |                       |                                                                                                                                                                                                                                                                                                                |                     |                                                                                                 |                                                                                                           |      |
|-------------------------------------|--------------|-----------------------|----------------------------------------------------------------------------------------------------------------------------------------------------------------------------------------------------------------------------------------------------------------------------------------------------------------|---------------------|-------------------------------------------------------------------------------------------------|-----------------------------------------------------------------------------------------------------------|------|
|                                     |              |                       |                                                                                                                                                                                                                                                                                                                |                     | lecturers,<br>16.5%<br>consultants,<br>16.5% nurses,<br>4.1% other<br>staff                     |                                                                                                           |      |
| Gan et al.<br>(2014),<br>Canada     | Survey       | Academic<br>hospital  | Data not<br>provided                                                                                                                                                                                                                                                                                           | Medical<br>students | Consultants                                                                                     | Low response<br>rate,<br>inappropriate<br>sampling,<br>small sample<br>size and<br>classification<br>bias | High |
| Fried et al.<br>(2015), USA         | Before-after | Academic<br>hospital  | Power<br>mistreatment<br>defined as<br>“made to feel<br>intimidated,<br>dehumanized,<br>or had a threat<br>made about a<br>recommendati<br>on, your grade,<br>or your career<br>Being coerced<br>into carrying<br>out personal<br>services<br>unrelated to<br>the expected<br>role of interns<br>and instances | Medical<br>students | Residents<br>49.7%,<br>Clinical<br>faculty 36.9%,<br>preclinical<br>faculty 7.9%                | -                                                                                                         | low  |
| Al-Shafae et<br>al. (2013),<br>Oman | Survey       | Academic<br>hospitals |                                                                                                                                                                                                                                                                                                                | Residents           | Internal<br>medicine<br>60.3%, surgery<br>29%,<br>pediatrics<br>15.5%.<br>Specialists<br>51.7%, | Inappropriate<br>sampling,<br>inadequate<br>sample size,<br>inadequate<br>description of<br>study         | High |

1  
2  
3  
4  
5  
6  
7  
8  
9  
10  
11  
12  
13  
14  
15  
16  
17  
18  
19  
20  
21  
22  
23  
24  
25  
26  
27  
28  
29  
30  
31  
32  
33  
34  
35  
36  
37  
38  
39  
40  
41  
42  
43  
44  
45  
46  
47

For peer review only

in which  
interns were  
excluded from  
reasonable  
learning  
opportunities  
offered to  
others, or  
threatened  
with failure or  
poor  
evaluations for  
reasons  
unrelated to  
academic  
performance

consultants  
50%, residents  
12.1%, nurses  
24.1%

population and  
coverage bias

Owoaje et al.  
(2012),  
Nigeria

Survey

Academic  
hospital

Data not  
provided

Medical  
Students

Consultants  
69.1%,  
residents/  
fellows 52.4%,  
other students  
15.7%, nurses  
7.8%,  
laboratory  
technicians  
4.1%

Low response  
rate

Low

Askew et al.  
(2012),  
Australia

Survey

Academic and  
non-academic  
hospitals

Data not  
provided

Consultants

Consultants  
44%,  
Managers  
27%, Patients  
15%, Nurses/  
midwives 4%,

Low response  
rate

Low

1  
2  
3  
4  
5  
6  
7  
8  
9  
10  
11  
12  
13  
14  
15  
16  
17  
18  
19  
20  
21  
22  
23  
24  
25  
26  
27  
28  
29  
30  
31  
32  
33  
34  
35  
36  
37  
38  
39  
40  
41  
42  
43  
44  
45  
46  
47

|                                 |              |                    |                                                                          |                    |                                                |                                                                               |                                                                                                                                                       |          |
|---------------------------------|--------------|--------------------|--------------------------------------------------------------------------|--------------------|------------------------------------------------|-------------------------------------------------------------------------------|-------------------------------------------------------------------------------------------------------------------------------------------------------|----------|
| Meloni et al. (2011), Australia | Before-after | Academic hospital  | Data not provided                                                        | Hospital employees | junior consultants 1%                          | Data not provided                                                             | Lack of blinding of outcome assessors, high loss to follow-up, lack of statistical analysis or ITS design, and unit of analysis not clearly described | High     |
| Dikmetas et al. (2011), Turkey  | Survey       | Academic hospital  | Data not provided                                                        | Residents          | Surgeons > Internists                          | Low response rate                                                             | Low response rate, inappropriate sampling and inadequate statistical analysis                                                                         | Moderate |
| Eriksen et al. (2011), Norway   | Survey       | Academic hospital  | NAQ used                                                                 | Hospital employees | Colleagues. Specific occupations not described | Low response rate, inappropriate sampling and inadequate statistical analysis | Inappropriate sampling, classification and coverage bias                                                                                              | Moderate |
| Imran et al. (2010), Pakistan   | Survey       | Academic hospitals | Threats to professional status, threats to personal standing, isolation, | Residents          | Consultants                                    | Inappropriate sampling, classification and coverage bias                      |                                                                                                                                                       | Moderate |

39

1  
2  
3  
4  
5  
6  
7  
8  
9  
10  
11  
12  
13  
14  
15  
16  
17  
18  
19  
20  
21  
22  
23  
24  
25  
26  
27  
28  
29  
30  
31  
32  
33  
34  
35  
36  
37  
38  
39  
40  
41  
42  
43  
44  
45  
46  
47

overwork, and  
destabilization

|                                       |              |                    |                                                                      |             |                                                                                                                                            |                                                                                                                                                                |      |
|---------------------------------------|--------------|--------------------|----------------------------------------------------------------------|-------------|--------------------------------------------------------------------------------------------------------------------------------------------|----------------------------------------------------------------------------------------------------------------------------------------------------------------|------|
| Ogunsemi et al. (2010), Nigeria       | Survey       | Academic hospital  | Data not provided                                                    | Residents   | 58% administrative staff, 41.4% from the hospital chief executive, 40.4% from patient relatives, 32.7% nurses, 30% residents, 20% patients | Inadequate sample size                                                                                                                                         | Low  |
| Best et al. (2010), USA               | Before-after | Academic hospital  | Data not provided                                                    | Unspecified | Data not provided                                                                                                                          | Study purpose not clearly described, insufficient enrollment, no blinding of outcome assessors, lack of statistical or individual-level analysis or ITS design | High |
| Nagata-Kobayashi et al. (2009), Japan | Survey       | Academic hospitals | Assigned you tasks as punishment; threatened to fail you unfairly in | Residents   | Surgery (27.6%), internal medicine (21.4%), emergency                                                                                      | Low response rate                                                                                                                                              | Low  |

40

1  
2  
3  
4  
5  
6  
7  
8  
9  
10  
11  
12  
13  
14  
15  
16  
17  
18  
19  
20  
21  
22  
23  
24  
25  
26  
27  
28  
29  
30  
31  
32  
33  
34  
35  
36  
37  
38  
39  
40  
41  
42  
43  
44  
45  
46  
47

|  |                                  |        |                                                                                                                                                 |             |                                                                                        |                                                                               |          |
|--|----------------------------------|--------|-------------------------------------------------------------------------------------------------------------------------------------------------|-------------|----------------------------------------------------------------------------------------|-------------------------------------------------------------------------------|----------|
|  |                                  |        | residency; competed maliciously or unfairly with you; made negative remarks to you about becoming a consultant or pursuing a career in medicine |             | medicine (11.5%), anaesthesia (11.3%). Consultants 34.1%, patients 21.7%, nurses 17.2% |                                                                               |          |
|  |                                  |        | A threat to professional status and personal standing, isolation, enforced overwork, destabilization                                            | Residents   | Consultants 30%, nurses 30%, patients 25%, radiologists 8%, residents/fellows 7%       | Low response rate, inadequate sample size and description of study population | Moderate |
|  | Scott et al. (2008), New Zealand | Survey | Academic hospital                                                                                                                               |             |                                                                                        |                                                                               |          |
|  |                                  |        | Data not provided                                                                                                                               | Consultants | Senior colleagues                                                                      | Inadequate sample size                                                        | Low      |
|  | Gadit et al. (2007), Pakistan    | Survey | Academic and non-academic hospitals                                                                                                             |             |                                                                                        |                                                                               |          |
|  |                                  |        | Data not provided                                                                                                                               | Consultants | Colleagues 24%, patients 19%, teachers 18%, supervisors 15%,                           | Inappropriate sampling, inadequate sample size, and coverage bias             | Moderate |
|  |                                  |        |                                                                                                                                                 |             |                                                                                        |                                                                               |          |
|  | Shrier et al. (2007), USA        | Survey | Academic and non-academic hospitals                                                                                                             |             |                                                                                        |                                                                               |          |



1  
2  
3  
4  
5  
6  
7  
8  
9  
10  
11  
12  
13  
14  
15  
16  
17  
18  
19  
20  
21  
22  
23  
24  
25  
26  
27  
28  
29  
30  
31  
32  
33  
34  
35  
36  
37  
38  
39  
40  
41  
42  
43  
44  
45  
46  
47

|                               |        |                      |                   |                  |                                                                                                                                                                                                  |                                                                                      |      |
|-------------------------------|--------|----------------------|-------------------|------------------|--------------------------------------------------------------------------------------------------------------------------------------------------------------------------------------------------|--------------------------------------------------------------------------------------|------|
| Cheema et al. (2005), Ireland | Survey | Academic hospitals   | Data not provided | Residents        | Senior residents 51-70%, Nursing staff 47-59%, Administration 15-16%, Colleagues 12-13%<br>Lecturers 27.9%, Research/senior research fellows 27.7%, Professors 16.6%, Associate professors 13.6% | Low response rate                                                                    | Low  |
| Rautio et al. (2005), Finland | Survey | Academic hospital    | Data not provided | Medical students | Superiors and colleagues                                                                                                                                                                         | Low response rate, inappropriate sampling, inadequate sample size, and coverage bias | High |
| Carr et al. (2000), USA       | Survey | Academic hospitals   | Data not provided | Consultants      | 54% greater seniority, 34% same seniority, 12% less senior. 49% of bullies older than victim                                                                                                     | -                                                                                    | Low  |
| Quine (1999), UK              | Survey | Non-academic clinics | Data not provided | Consultants      | General surgeons and obstetricians                                                                                                                                                               | -                                                                                    | Low  |
| Wear et al. (2005), USA       | Survey | Academic hospital    | Data not provided | Medical students |                                                                                                                                                                                                  | Low response rate, inappropriate sampling, inadequate                                | High |

42

sample size,  
classification  
and lack of  
validated  
measurement  
tool

\*Academic hospitals/clinics were defined as teaching hospitals/clinics with a university affiliation

†Interrupted time series

‡The NAQ is the negative acts questionnaire, a validated tool for assessing the prevalence of workplace bullying

For peer review only

**Table 2: Self-reported description of specific bullying behaviours**

| Behaviour                                               | No. of studies/<br>Total studies* | Total cohort<br>No. affected/<br>total participants who<br>completed surveys on<br>behaviours (%)* | Men<br>No. affected/<br>total men who<br>completed surveys on<br>behaviours (%)† | Women<br>No. affected/<br>Total women who<br>completed surveys on<br>behaviours (%)† |
|---------------------------------------------------------|-----------------------------------|----------------------------------------------------------------------------------------------------|----------------------------------------------------------------------------------|--------------------------------------------------------------------------------------|
| <b>Threats to professional status</b>                   |                                   |                                                                                                    |                                                                                  |                                                                                      |
| Persistent unjustified criticism                        | 10/19                             | 2587/10404 (24.9)                                                                                  | 535/1690 (31.7)                                                                  | 552/1402 (39.4)                                                                      |
| Excessive monitoring of work                            | 6/19                              | 1752/6079 (28.8)                                                                                   | 442/1525 (27.7)                                                                  | 441/1298 (34.0)                                                                      |
| Intimidatory use of discipline                          | 11/19                             | 1156/17046 (6.8)                                                                                   | 323/1746 (18.5)                                                                  | 237/1546 (15.3)                                                                      |
| Spread of gossip/rumours                                | 5/19                              | 892/3694 (24.2)                                                                                    | 88/596 (14.8)                                                                    | 94/453 (20.8)                                                                        |
| False allegations                                       | 5/19                              | 577/3694 (15.6)                                                                                    | 59/596 (9.9)                                                                     | 54/453 (11.9)                                                                        |
| Refusal of leave, training or promotion                 | 6/19                              | 1174/6079 (19.3)                                                                                   | 215/1690 (12.7)                                                                  | 197/1402 (14.1)                                                                      |
| <b>Isolation</b>                                        |                                   |                                                                                                    |                                                                                  |                                                                                      |
| Social/professional exclusion                           | 13/19                             | 3895/13963 (27.9)                                                                                  | 301/1718 (17.5)                                                                  | 925/2385 (38.8)                                                                      |
| <b>Overwork</b>                                         |                                   |                                                                                                    |                                                                                  |                                                                                      |
| Undue pressure to produce work                          | 7/19                              | 2509/6562 (38.2)                                                                                   | 233/1525 (15.3)                                                                  | 355/1570 (22.6)                                                                      |
| Setting impossible deadlines                            | 6/19                              | 1571/6079 (25.8)                                                                                   | 164/1525 (10.8)                                                                  | 189/1298 (14.6)                                                                      |
| <b>Destabilization</b>                                  |                                   |                                                                                                    |                                                                                  |                                                                                      |
| Shifting goalposts                                      | 1/19                              | 54/417 (12.9)                                                                                      | Not reported                                                                     | Not reported                                                                         |
| Removal of areas of responsibility without consultation | 8/19                              | 1397/6193 (22.6)                                                                                   | 160/1525 (10.5)                                                                  | 171/1298 (13.2)                                                                      |

|                                                  |      |                  |                 |                 |
|--------------------------------------------------|------|------------------|-----------------|-----------------|
| Withholding information that affects performance | 7/19 | 1786/6137 (29.1) | 219/1553 (14.1) | 267/1328 (20.1) |
| Ordered to work below one's competence level     | 9/19 | 2860/8017 (35.7) | 81/625 (13.0)   | 99/483 (20.5)   |

\*Total number of studies that described types of bullying behaviours, including studies that did not stratify results by sex. As a result, the denominator for the number of participants in total is not the sum of the denominators for men and women. The denominator was calculated from the total number of individuals who completed surveys on specific bullying behaviours, while the numerator was calculated from the number of individuals who indicated they experienced the specified bullying behaviour. Not all survey studies offered respondents the same options to respond to, and as a result the denominators for each bullying behaviour differ.

†Of the studies that separated data by gender or solely included the results of one gender and included the specified bullying behaviour.

1  
2  
3  
4  
5  
6  
7  
8  
9  
10  
11  
12  
13  
14  
15  
16  
17  
18  
19  
20  
21  
22  
23  
24  
25  
26  
27  
28  
29  
30  
31  
32  
33  
34  
35  
36  
37  
38  
39  
40  
41  
42  
43  
44  
45  
46  
47

**Table 3. Self-reported impact of academic bullying**

| <b>Effect of academic bullying</b>                      | <b>No. of studies/<br/>Total studies*</b> | <b>Total cohort<br/>No. of affected<br/>participants/<br/>total participants who<br/>completed surveys on<br/>the impact of bullying<br/>(%)*</b> | <b>Men<br/>No. of affected men/<br/>total men who<br/>completed surveys on<br/>the impact of bullying<br/>(%)†</b> | <b>Women<br/>No. of affected women/<br/>total women who<br/>completed surveys on<br/>the impact of bullying<br/>(%)†</b> |
|---------------------------------------------------------|-------------------------------------------|---------------------------------------------------------------------------------------------------------------------------------------------------|--------------------------------------------------------------------------------------------------------------------|--------------------------------------------------------------------------------------------------------------------------|
| <b>Psychologic</b>                                      |                                           |                                                                                                                                                   |                                                                                                                    |                                                                                                                          |
| Psychologic distress including depressive/PTSD symptoms | 9/20                                      | 839/2076 (40.4)                                                                                                                                   | 103/161 (64.0)                                                                                                     | 64/101 (63.4)                                                                                                            |
| Reduced confidence in clinical skill                    | 4/20                                      | 296/1518 (19.5)                                                                                                                                   | 68/212 (32.1)                                                                                                      | 97/597 (16.2)                                                                                                            |
| <b>Career</b>                                           |                                           |                                                                                                                                                   |                                                                                                                    |                                                                                                                          |
| Missed career opportunities                             | 12/20                                     | 1570/6637 (23.7)                                                                                                                                  | 89/812 (11.0)                                                                                                      | 310/1325 (23.4)                                                                                                          |
| Considerations of quitting                              | 8/20                                      | 1023/2704 (37.8)                                                                                                                                  | Not reported                                                                                                       | Not reported                                                                                                             |
| Termination of employment                               | 3/20                                      | 84/1046 (8.0)                                                                                                                                     | 4/139 (2.9)                                                                                                        | 4/150 (2.7)                                                                                                              |
| Leave of absence                                        | 2/20                                      | 50/748 (6.7)                                                                                                                                      | Not reported                                                                                                       | Not reported                                                                                                             |
| Self-reported worsening of clinical performance         | 5/20                                      | 528/1801 (29.3)                                                                                                                                   | 42/161 (26.1)                                                                                                      | 22/101 (21.8)                                                                                                            |

\*Total number of studies that described the impact of bullying, including studies that did not stratify results by sex. Not all participants were given the same options to select from.

†Of the studies that separated data by gender or solely included the results of one gender and included the impact of bullying.

**Table 4. Barriers to addressing academic bullying**

| <b>Barrier</b>                                 | <b>No. of studies/Total studies*</b> | <b>No. of participants/total participants (%)</b> |
|------------------------------------------------|--------------------------------------|---------------------------------------------------|
| <b>Low reporting rates</b>                     |                                      |                                                   |
| Lack of awareness of what constitutes bullying | 3/18                                 | 53/397 (13.4)                                     |
| Lack of awareness of reporting process         | 8/18                                 | 934/2931 (31.9)                                   |
| Lack of perceived benefit                      | 4/18                                 | 214/538 (39.8)                                    |
| Fear that bullying would worsen                | 6/18                                 | 448/1168 (38.4)                                   |
| Fear of career ramifications                   | 7/18                                 | 829/2199 (37.7)                                   |
| Concerns regarding confidentiality             | 3/18                                 | 48/397 (12.1)                                     |
| <b>Institutional factors</b>                   |                                      |                                                   |
| Hierarchical nature of medicine                | 4/18                                 | Not reported                                      |
| Recurring cycle of abuse                       | 3/18                                 | Not reported                                      |
| Normalization of bullying                      | 5/18                                 | Not reported                                      |
| Lack of enforcement                            | 5/18                                 | 391/1106 (35.4)                                   |

\*Total number of studies that described barriers of bullying behaviours

1  
2  
3  
4  
5  
6  
7  
8  
9  
10  
11  
12  
13  
14  
15  
16  
17  
18  
19  
20  
21  
22  
23  
24  
25  
26  
27  
28  
29  
30  
31  
32  
33  
34  
35  
36  
37  
38  
39  
40  
41  
42  
43  
44  
45  
46  
47

For peer review only

1  
2  
3  
4  
5  
6  
7  
8  
9  
10  
11  
12  
13  
14  
15  
16  
17  
18  
19  
20  
21  
22  
23  
24  
25  
26  
27  
28  
29  
30  
31  
32  
33  
34  
35  
36  
37  
38  
39  
40  
41  
42  
43  
44  
45  
46  
47  
48  
49  
50  
51  
52  
53  
54  
55  
56  
57  
58  
59  
60



Figure 1: The flow diagram of included studies  
We included 44 studies in this review. Reasons for exclusion are described at each stage of study selection.

2195x2212mm (72 x 72 DPI)



1  
2  
3  
4  
5  
6  
7  
8  
9  
10  
11  
12  
13  
14  
15  
16  
17  
18  
19  
20  
21  
22  
23  
24  
25  
26  
27  
28  
29  
30  
31  
32  
33  
34  
35  
36  
37  
38  
39  
40  
41  
42  
43  
44  
45  
46  
47  
48  
49  
50  
51  
52  
53  
54  
55  
56  
57  
58  
59  
60



Central illustration: The definition, manifestations, impact, victims, and perpetrators of academic bullying

Academic bullying is defined as an abuse of authority through punishing behaviours that include overwork, destabilization, and isolation. Victims are commonly men, while perpetrators are commonly male consultants. Individual and institutional factors contribute to the ongoing cycle of bullying.

423x260mm (300 x 300 DPI)

**Supplementary table S1: Pooled prevalence of specific bullying behaviours by level of training**

| <b>Behaviour</b>                                        | <b>No. of studies/<br/>Total studies*</b> | <b>Medical Students<br/>No. of participants/<br/>total participants<br/>(%)*</b> | <b>Residents and<br/>fellows<br/>No. of participants/<br/>total participants<br/>(%)*</b> | <b>Consultants<br/>No. of participants/<br/>total participants<br/>(%)*</b> |
|---------------------------------------------------------|-------------------------------------------|----------------------------------------------------------------------------------|-------------------------------------------------------------------------------------------|-----------------------------------------------------------------------------|
| <b>Threats to professional status</b>                   |                                           |                                                                                  |                                                                                           |                                                                             |
| Persistent unjustified criticism                        | 8/17                                      | 192/269 (71.4)                                                                   | 1696/6444 (26.3)                                                                          | 600/2881 (20.8)                                                             |
| Excessive monitoring of work                            | 4/17                                      | Not reported                                                                     | 1020/2445 (41.7)                                                                          | 564/2824 (20.0)                                                             |
| Intimidatory use of discipline                          | 11/17                                     | 565/13363 (4.2)                                                                  | 541/2561 (21.1)                                                                           | 38/1112 (3.4)                                                               |
| Spread of gossip/rumours                                | 3/17                                      | Not reported                                                                     | Not reported                                                                              | 755/2881 (26.2)                                                             |
| False allegations                                       | 3/17                                      | Not reported                                                                     | Not reported                                                                              | 509/2881 (17.7)                                                             |
| <b>Isolation</b>                                        |                                           |                                                                                  |                                                                                           |                                                                             |
| Social/professional exclusion                           | 12/17                                     | 156/776 (20.1)                                                                   | 1684/6019 (28.0)                                                                          | 1272/4445 (28.6)                                                            |
| Refusal of leave, training or promotion                 | 4/17                                      | Not reported                                                                     | 286/2445 (11.7)                                                                           | 727/2824 (25.7)                                                             |
| <b>Overwork</b>                                         |                                           |                                                                                  |                                                                                           |                                                                             |
| Undue pressure to produce work                          | 7/17                                      | Not reported                                                                     | 827/2928 (28.2)                                                                           | 1326/2824 (47.0)                                                            |
| Setting impossible deadlines                            | 6/17                                      | Not reported                                                                     | 351/2445 (14.4)                                                                           | 965/2824 (34.2)                                                             |
| <b>Destabilization</b>                                  |                                           |                                                                                  |                                                                                           |                                                                             |
| Shifting goalposts                                      | 1/17                                      | Not reported                                                                     | 54/654 (8.3)                                                                              | Not reported                                                                |
| Removal of areas of responsibility without consultation | 6/17                                      | 11/56 (19.6)                                                                     | 267/2503 (10.7)                                                                           | 784/2824 (27.8)                                                             |

1  
2  
3  
4  
5  
6  
7  
8  
9  
10  
11  
12  
13  
14  
15  
16  
17  
18  
19  
20  
21  
22  
23  
24  
25  
26  
27  
28  
29  
30  
31  
32  
33  
34  
35  
36  
37  
38  
39  
40  
41  
42  
43  
44  
45  
46  
47

|                                                  |      |                |                  |                  |
|--------------------------------------------------|------|----------------|------------------|------------------|
| Withholding information that affects performance | 5/17 | Not reported   | 415/2503 (16.6)  | 1140/2824 (40.4) |
| Ordered to work below one's competence level     | 6/17 | 182/269 (67.7) | 1202/3574 (33.6) | 975/2881 (33.8)  |

\*Total number of studies that described types of bullying behaviours that separated data by level of training

For peer review only

**Supplementary table S2: The pooled impact of academic bullying by level of training**

| <b>Effect of academic bullying</b>                      | <b>No. of studies/<br/>Total studies*</b> | <b>Medical Students<br/>No. of participants/<br/>total participants<br/>(%)*</b> | <b>Residents and<br/>fellows<br/>No. of participants/<br/>total participants<br/>(%)*</b> | <b>Consultants<br/>No. of participants/<br/>total participants<br/>(%)*</b> |
|---------------------------------------------------------|-------------------------------------------|----------------------------------------------------------------------------------|-------------------------------------------------------------------------------------------|-----------------------------------------------------------------------------|
| <b>Psychiatric</b>                                      |                                           |                                                                                  |                                                                                           |                                                                             |
| Psychiatric distress including depressive/PTSD symptoms | 8/19                                      | 422/579 (72.9)                                                                   | 220/456 (48.2)                                                                            | 178/996 (17.9)                                                              |
| Reduced confidence in clinical skill                    | 4/19                                      | 119/262 (45.4)                                                                   | Not reported                                                                              | 177/1259 (14.1)                                                             |
| <b>Career</b>                                           |                                           |                                                                                  |                                                                                           |                                                                             |
| Missed career opportunities                             | 12/19                                     | 484/3020 (16.0)                                                                  | 141/389 (36.2)                                                                            | 948/3228 (29.4)                                                             |
| Considered quitting                                     | 8/19                                      | 109/317 (34.4)                                                                   | Not reported                                                                              | 908/2375 (38.2)                                                             |
| Terminated employment                                   | 3/19                                      | Not reported                                                                     | 73/698 (10.5)                                                                             | 11/348 (3.2)                                                                |
| Leave of absence                                        | 2/19                                      | Not reported                                                                     | Not reported                                                                              | 50/748 (6.7)                                                                |
| Self-reported worsening of clinical performance         | 4/19                                      | 202/579 (34.9)                                                                   | 35/203 (17.2)                                                                             | 51/563 (9.1)                                                                |

\*Total number of studies that described the impact of academic bullying and separated data by level of training

**Supplementary table S3. Suggested policies, interventions and reported outcomes**

| Intervention                                       | Outcome                                                                                                                                                                                                               |
|----------------------------------------------------|-----------------------------------------------------------------------------------------------------------------------------------------------------------------------------------------------------------------------|
| <b>Zero-tolerance policy</b>                       |                                                                                                                                                                                                                       |
| (Meloni and Austin, 2011)                          | Increased employee engagement and workplace satisfaction<br>Increased trust among victims that reports would be appropriately managed (44% to 64%)<br>Victims felt safer reporting incidents of bullying (67% to 84%) |
| (Fried et al., 2012)                               | Improved awareness of where and whom to report to (67% to 84%)<br>Reduced power abuse (43% to 30%) but no change in overall mistreatment rates                                                                        |
| <b>Bullying workshops</b>                          |                                                                                                                                                                                                                       |
| (Benmore et al., 2018)                             | Increased willingness to try to repair the harm caused by bullying and became more conscious of giving feedback                                                                                                       |
| (Kulaylat et al., 2016)*, USA)                     | Data not provided                                                                                                                                                                                                     |
| (Cresswell et al., 2016)*                          | Data not provided                                                                                                                                                                                                     |
| (Oku et al., 2014)*                                | Data not provided                                                                                                                                                                                                     |
| <b>Tracking and reporting mistreatment data</b>    |                                                                                                                                                                                                                       |
| (House et al., 2018)                               | Decreased unprofessional or disrespectful behaviour by faculty as reported by students [4.8% (2015-16) to 1.7% (2016-17)]                                                                                             |
| (Gan and Snell, 2014)                              | No difference in mistreatment                                                                                                                                                                                         |
| (Mavis et al., 2014)*                              | Data not provided                                                                                                                                                                                                     |
| <b>Staff education on formal reporting process</b> |                                                                                                                                                                                                                       |
| (Fried et al., 2012)                               | No change in reporting rate                                                                                                                                                                                           |
| (Al-Shafae, 2013)*                                 | Data not provided                                                                                                                                                                                                     |
| (Imran et al., 2010)*                              | Data not provided                                                                                                                                                                                                     |
| (Wear et al., 2005)*                               | Data not provided                                                                                                                                                                                                     |
| (Scott et al., 2008)*                              | Data not provided                                                                                                                                                                                                     |

**Develop a committee to handle reporting**

(Best et al., 2010) Resolutions reached 96% of formal reports

(Gadit et al., 2007)\* Data not provided

(Kapoor et al., 2016)\* Data not provided

---

\*Suggested approach that had not been implemented

For peer review only

**Supplementary figure S1: Search strategy**

1. Exp bullying
2. Exp medicine
3. Exp hospitals
4. (sabotage or mistreat\* or discredit or humiliation or harassment or demean or bully\* or belittle or intimidate or disrespect or coerce or ignore or undermine or exclude or libel or slander or criticism or overwork\*).ti
5. (Workplace or career or professional or academic or promotion\* or employment or job or profession or reputation or academia).mp
6. (medicine or residency\* or "medical school" or "clinical training" or hospital or internship or fellow\* or "junior doctor" or "house officer" or "clinical clerk" or "attending physician" or physician or doctor or clinician or hierarchical system or "clinician-scientist" or learner or faculty or "NHS").ti,ab.
7. Exp aggression
8. 1 or 4 or 7
9. 5 and 8
10. 2 or 3 or 6
11. 9 and 10

1  
2  
3  
4  
5  
6  
7  
8  
9  
10  
11  
12  
13  
14  
15  
16  
17  
18  
19  
20  
21  
22  
23  
24  
25  
26  
27  
28  
29  
30  
31  
32  
33  
34  
35  
36  
37  
38  
39  
40  
41  
42  
43  
44  
45  
46  
47  
48  
49  
50  
51  
52  
53  
54  
55  
56  
57  
58  
59  
60



Supplementary figure S2: The risk of bias of survey studies included in this review  
Most studies in this review had at least a moderate risk of bias. Common sources of bias included inappropriate sampling techniques and low sample sizes



|                | Study objective clearly stated | Eligibility criteria pre-specified | Sample representativeness | All eligible participants enrolled | Sample size | Intervention clearly described | Outcome measures clearly described and valid | Blinding of outcome assessors | Follow-up rate | Statistical analysis of pre-post changes | Multiple outcome measures | Group-level interventions and individual-level outcome efforts |
|----------------|--------------------------------|------------------------------------|---------------------------|------------------------------------|-------------|--------------------------------|----------------------------------------------|-------------------------------|----------------|------------------------------------------|---------------------------|----------------------------------------------------------------|
| Benmore 2018   | +                              | +                                  | +                         | -                                  | -           | +                              | +                                            | -                             | -              | -                                        | -                         | +                                                              |
| Best 2010      | -                              | +                                  | +                         | -                                  | +           | +                              | +                                            | -                             | +              | -                                        | -                         | -                                                              |
| Cresswell 2016 | -                              | -                                  | +                         | -                                  | -           | +                              | -                                            | -                             | -              | -                                        | -                         | +                                                              |
| Fried 2015     | +                              | +                                  | +                         | +                                  | +           | +                              | +                                            | -                             | +              | +                                        | -                         | +                                                              |
| House 2018     | +                              | +                                  | +                         | -                                  | -           | +                              | -                                            | -                             | +              | -                                        | -                         | -                                                              |
| Kulaylat 2016  | +                              | +                                  | +                         | +                                  | -           | +                              | +                                            | -                             | +              | +                                        | -                         | +                                                              |
| Meloni 2011    | +                              | +                                  | +                         | +                                  | +           | +                              | +                                            | -                             | -              | -                                        | -                         | -                                                              |

Supplementary figure S3: The risk of bias of before-after studies included in this review  
 Most studies in this review had at least a moderate risk of bias. Common sources of bias included lack of blinding or a control group and low sample sizes



# PRISMA 2009 Checklist

| Section/topic                      | #  | Checklist item                                                                                                                                                                                                                                                                                              | Reported on page # |
|------------------------------------|----|-------------------------------------------------------------------------------------------------------------------------------------------------------------------------------------------------------------------------------------------------------------------------------------------------------------|--------------------|
| <b>TITLE</b>                       |    |                                                                                                                                                                                                                                                                                                             |                    |
| Title                              | 1  | Identify the report as a systematic review, meta-analysis, or both.                                                                                                                                                                                                                                         | 1                  |
| <b>ABSTRACT</b>                    |    |                                                                                                                                                                                                                                                                                                             |                    |
| Structured summary                 | 2  | Provide a structured summary including, as applicable: background; objectives; data sources; study eligibility criteria, participants, and interventions; study appraisal and synthesis methods; results; limitations; conclusions and implications of key findings; systematic review registration number. | 2                  |
| <b>INTRODUCTION</b>                |    |                                                                                                                                                                                                                                                                                                             |                    |
| Rationale                          | 3  | Describe the rationale for the review in the context of what is already known.                                                                                                                                                                                                                              | 4                  |
| Objectives                         | 4  | Provide an explicit statement of questions being addressed with reference to participants, interventions, comparisons, outcomes, and study design (PICOS).                                                                                                                                                  | 4-5                |
| <b>METHODS</b>                     |    |                                                                                                                                                                                                                                                                                                             |                    |
| Protocol and registration          | 5  | Indicate if a review protocol exists, if and where it can be accessed (e.g., Web address), and, if available, provide registration information including registration number.                                                                                                                               | N/A                |
| Eligibility criteria               | 6  | Specify study characteristics (e.g., PICOS, length of follow-up) and report characteristics (e.g., years considered, language, publication status) used as criteria for eligibility, giving rationale.                                                                                                      | 5-6                |
| Information sources                | 7  | Describe all information sources (e.g., databases with dates of coverage, contact with study authors to identify additional studies) in the search and date last searched.                                                                                                                                  | 5                  |
| Search                             | 8  | Present full electronic search strategy for at least one database, including any limits used, such that it could be repeated.                                                                                                                                                                               | 5                  |
| Study selection                    | 9  | State the process for selecting studies (i.e., screening, eligibility, included in systematic review, and, if applicable, included in the meta-analysis).                                                                                                                                                   | 6                  |
| Data collection process            | 10 | Describe method of data extraction from reports (e.g., piloted forms, independently, in duplicate) and any processes for obtaining and confirming data from investigators.                                                                                                                                  | 6                  |
| Data items                         | 11 | List and define all variables for which data were sought (e.g., PICOS, funding sources) and any assumptions and simplifications made.                                                                                                                                                                       | 6                  |
| Risk of bias in individual studies | 12 | Describe methods used for assessing risk of bias of individual studies (including specification of whether this was done at the study or outcome level), and how this information is to be used in any data synthesis.                                                                                      | 6-7                |
| Summary measures                   | 13 | State the principal summary measures (e.g., risk ratio, difference in means).                                                                                                                                                                                                                               | 7                  |
| Synthesis of results               | 14 | Describe the methods of handling data and combining results of studies, if done, including measures of consistency (e.g., I <sup>2</sup> ) for each meta-analysis.                                                                                                                                          | 7                  |



# PRISMA 2009 Checklist

Page 1 of 2

| Section/topic                 | #  | Checklist item                                                                                                                                                                                           | Reported on page # |
|-------------------------------|----|----------------------------------------------------------------------------------------------------------------------------------------------------------------------------------------------------------|--------------------|
| Risk of bias across studies   | 15 | Specify any assessment of risk of bias that may affect the cumulative evidence (e.g., publication bias, selective reporting within studies).                                                             | N/A                |
| Additional analyses           | 16 | Describe methods of additional analyses (e.g., sensitivity or subgroup analyses, meta-regression), if done, indicating which were pre-specified.                                                         | 6-7                |
| <b>RESULTS</b>                |    |                                                                                                                                                                                                          |                    |
| Study selection               | 17 | Give numbers of studies screened, assessed for eligibility, and included in the review, with reasons for exclusions at each stage, ideally with a flow diagram.                                          | 8                  |
| Study characteristics         | 18 | For each study, present characteristics for which data were extracted (e.g., study size, PICOS, follow-up period) and provide the citations.                                                             | 8                  |
| Risk of bias within studies   | 19 | Present data on risk of bias of each study and, if available, any outcome level assessment (see item 12).                                                                                                | 15                 |
| Results of individual studies | 20 | For all outcomes considered (benefits or harms), present, for each study: (a) simple summary data for each intervention group (b) effect estimates and confidence intervals, ideally with a forest plot. | 8-14               |
| Synthesis of results          | 21 | Present results of each meta-analysis done, including confidence intervals and measures of consistency.                                                                                                  | N/A                |
| Risk of bias across studies   | 22 | Present results of any assessment of risk of bias across studies (see Item 15).                                                                                                                          | N/A                |
| Additional analysis           | 23 | Give results of additional analyses, if done (e.g., sensitivity or subgroup analyses, meta-regression [see Item 16]).                                                                                    | 9-12               |
| <b>DISCUSSION</b>             |    |                                                                                                                                                                                                          |                    |
| Summary of evidence           | 24 | Summarize the main findings including the strength of evidence for each main outcome; consider their relevance to key groups (e.g., healthcare providers, users, and policy makers).                     | 15-19              |
| Limitations                   | 25 | Discuss limitations at study and outcome level (e.g., risk of bias), and at review-level (e.g., incomplete retrieval of identified research, reporting bias).                                            | 19                 |
| Conclusions                   | 26 | Provide a general interpretation of the results in the context of other evidence, and implications for future research.                                                                                  | 20                 |
| <b>FUNDING</b>                |    |                                                                                                                                                                                                          |                    |
| Funding                       | 27 | Describe sources of funding for the systematic review and other support (e.g., supply of data); role of funders for the systematic review.                                                               | 21                 |

From: Moher D, Liberati A, Tetzlaff J, Altman DG, The PRISMA Group (2009). Preferred Reporting Items for Systematic Reviews and Meta-Analyses: The PRISMA Statement. PLoS Med 6(7): e1000097. doi:10.1371/journal.pmed1000097

For more information, visit: [www.prisma-statement.org](http://www.prisma-statement.org).

Page 2 of 2

For peer review only - <http://bmjopen.bmj.com/site/about/guidelines.xhtml>

# BMJ Open

## A systematic review of academic bullying in medical settings: behaviours, perpetrators, victims, and consequences

|                                 |                                                                                                                                                                                                                                                                                  |
|---------------------------------|----------------------------------------------------------------------------------------------------------------------------------------------------------------------------------------------------------------------------------------------------------------------------------|
| Journal:                        | <i>BMJ Open</i>                                                                                                                                                                                                                                                                  |
| Manuscript ID                   | bmjopen-2020-043256.R2                                                                                                                                                                                                                                                           |
| Article Type:                   | Original research                                                                                                                                                                                                                                                                |
| Date Submitted by the Author:   | 29-Mar-2021                                                                                                                                                                                                                                                                      |
| Complete List of Authors:       | Averbuch, Tauben; McMaster University, Medicine<br>Eliya, Yousif; McMaster University, Health Research Methodology<br>Van Spall, Harriette Gillian Christine; McMaster University, Health Research Methods, Evidence, and Impact; Population Health Research Institute, Medicine |
| <b>Primary Subject Heading</b>: | Medical education and training                                                                                                                                                                                                                                                   |
| Secondary Subject Heading:      | Occupational and environmental medicine                                                                                                                                                                                                                                          |
| Keywords:                       | MEDICAL EDUCATION & TRAINING, GENERAL MEDICINE (see Internal Medicine), HEALTH SERVICES ADMINISTRATION & MANAGEMENT                                                                                                                                                              |
|                                 |                                                                                                                                                                                                                                                                                  |

SCHOLARONE™  
Manuscripts



I, the Submitting Author has the right to grant and does grant on behalf of all authors of the Work (as defined in the below author licence), an exclusive licence and/or a non-exclusive licence for contributions from authors who are: i) UK Crown employees; ii) where BMJ has agreed a CC-BY licence shall apply, and/or iii) in accordance with the terms applicable for US Federal Government officers or employees acting as part of their official duties; on a worldwide, perpetual, irrevocable, royalty-free basis to BMJ Publishing Group Ltd ("BMJ") its licensees and where the relevant Journal is co-owned by BMJ to the co-owners of the Journal, to publish the Work in this journal and any other BMJ products and to exploit all rights, as set out in our [licence](#).

The Submitting Author accepts and understands that any supply made under these terms is made by BMJ to the Submitting Author unless you are acting as an employee on behalf of your employer or a postgraduate student of an affiliated institution which is paying any applicable article publishing charge ("APC") for Open Access articles. Where the Submitting Author wishes to make the Work available on an Open Access basis (and intends to pay the relevant APC), the terms of reuse of such Open Access shall be governed by a Creative Commons licence – details of these licences and which [Creative Commons](#) licence will apply to this Work are set out in our licence referred to above.

Other than as permitted in any relevant BMJ Author's Self Archiving Policies, I confirm this Work has not been accepted for publication elsewhere, is not being considered for publication elsewhere and does not duplicate material already published. I confirm all authors consent to publication of this Work and authorise the granting of this licence.

1  
2  
3 **A systematic review of academic bullying in medical settings: behaviours, perpetrators, victims, and consequences**  
4

5 Averbuch T<sup>a</sup>, Yousif E<sup>b</sup>, Van Spall HGC<sup>b, c</sup>  
6

7  
8 **Corresponding author:** Harriette Gillian Christine Van Spall. Harriette.vanspall@phri.ca. 237 Barton Street East, Hamilton, ON L8L  
9  
10 2X2, Canada. Telephone: 905-521-2100 Ext: 40601 Fax: 905-538-8932  
11

12 <sup>a</sup>Department of Medicine, McMaster University, Hamilton, Ontario; <sup>b</sup>Department of Health Research Methods, Evidence, and Impact,  
13  
14 McMaster University, Hamilton, Ontario; <sup>c</sup>Population Health Research Institute, Hamilton, Ontario  
15

16  
17 **Word count: 4186**  
18  
19  
20  
21  
22  
23  
24  
25  
26  
27  
28  
29  
30  
31  
32  
33  
34  
35  
36  
37  
38  
39  
40  
41  
42

43 1  
44  
45  
46  
47

## ABSTRACT

**Purpose:** To characterize the dynamics and consequences of bullying in academic medical settings, describe individual and institutional factors that promote academic bullying, and potential interventions.

**Design:** Systematic review.

**Data sources:** We searched EMBASE and PsycINFO for articles published between January 1, 1999 and February 7, 2021.

**Study selection:** We included studies conducted in academic medical settings in which victims were either consultants or trainees, and described bullying behaviours; the perpetrators or victims; the impact, barriers to addressing academic bullying, and/or interventions. Study characteristics, quality, and data were assessed independently by 2 reviewers.

**Results:** We included 68 studies representing 82,349 consultants and trainees. We defined academic bullying as the abuse of authority in an academic setting to impede the education or career of the victim through punishing behaviours that include overwork, destabilization, and isolation. Of 35,779 individuals (in 28 studies) who responded about bullying patterns, the most common (38.2% of respondents) was overwork. Of 24,894 individuals (33 studies) who reported the impact, the most common was psychologic distress (39.1%). Among bullies identified by 15,868 individuals (31 studies), consultants (53.6%) were most common. Of 15,246 victims who reported gender (27 studies), the majority were women (56.2%). Among 9,410 victims (in 25 studies) who described their response, 28.9% filed a report and most (57.5%) did not perceive a positive outcome. Studies that tested the effect of interventions to mitigate bullying had a high risk of bias.

1  
2  
3 **Conclusions:** Academic bullying commonly involves overwork, and is perceived as having a negative impact on well-being.  
4  
5 Perpetrators were commonly male consultants and victims were commonly women. Only a minority of victims filed a report.  
6  
7 Methodologically robust trials of anti-bullying interventions are needed.  
8  
9

10 **Limitations:** Most studies (40/68) had at least a moderate risk of bias. All interventions were uncontrolled before-after studies.  
11

12 **Keywords:** Medical Education & Training, General Medicine, Health Services Administration & Management  
13  
14  
15  
16

### 17 **Strengths and limitations**

- 19 • This review is comprehensive, including 68 studies with 82,349 consultants and trainees, across several countries and  
20 including all levels of training.  
21
- 22 • We explicitly defined inclusion criteria, and used established tools to assess the risk of bias of included studies  
23
- 24 • The included studies varied in their definitions of bullying, sampling bias was noted among the surveys, and intervention  
25  
26  
27  
28  
29  
30  
31  
32  
33  
34  
35  
36  
37  
38  
39  
40  
41  
42  
43  
44  
45  
46  
47



## Background

Bullying behaviours have been described as repeated attempts to discredit, destabilize, or instill fear in an intended target<sup>1</sup>. Bullying can take many forms from overt abuse to subtle acts that erode the confidence, reputation, and progress of the victim<sup>2</sup>. Bullying is common in medicine, likely impacting mental health, professional interactions, and career advancement<sup>3-6</sup>. It may also impact a physician's ability to care for patients<sup>7</sup>. Surveys from the National Health Service (NHS) in the United Kingdom showed that 55% of staff experienced at least one type of bullying; 31% were doctors in training<sup>8</sup>. Bullying is closely related to harassment and discrimination, in which mistreatment is based on personal characteristics or a protected class such as sex or race<sup>9</sup>. Within academic settings, victims may experience all three and the distinction may be less clear. Unlike harassment and discrimination, which have specific legal definitions, bullying is an amorphous term whose victims are often left without legal recourse.

The hierarchical structure of academic medicine – in which there are power imbalances, subjective criteria for recruitment and career advancement, and siloed departments with few checks in place for toxic behaviours – may offer an operational environment in which bullying may be more widespread than in non-academic medical settings. Academic bullying is a seldom-used term within the literature, but is intended to describe the forms of bullying that may exist in academic settings. Academic bullying can be defined as mistreatment in academic institutions with the intention or effect of disrupting the academic or career progress of the victim<sup>10</sup>. The prevalence of academic bullying in medical settings is unknown likely due to a lack of definition of bullying behaviours, a fear of reporting, and insufficient research. There is not much known about the characteristics of perpetrators and victims, and about the

1  
2  
3 impact of bullying on academic productivity, career growth, and patient care. Furthermore, institutional barriers and facilitators of  
4  
5 bullying behavior have not been reported, and the effectiveness of interventions in addressing academic bullying have not been  
6  
7 evaluated.  
8  
9

10  
11  
12 The purpose of this systematic review is to define and classify patterns of academic bullying in medical settings; assess the  
13  
14 characteristics of perpetrators and victims; describe the impact of bullying on victims; review institutional barriers and facilitators of  
15  
16 bullying; and identify possible solutions.  
17  
18  
19

## 20 21 **Methods**

### 22 23 **Data sources and searches**

24  
25 This study follows PRISMA reporting guidelines. Two reviewers (T.A, Y.E.) searched two online databases (EMBASE and  
26  
27 PsycINFO) for English-language articles published between January 1, 1999, to February 7, 2021 and relevant to academic bullying in  
28  
29 medicine. An outline of the search is provided in Figure 1. A combination of medical subject heading (MeSH), title, and abstract text  
30  
31 terms encompassing “Medicine”; “Bullying” and “Academia” were used for the full search. The terms of the search are included in  
32  
33 Supplementary figure S1. Two authors (T.A, Y.E.) independently screened articles for inclusion. Differences were resolved by  
34  
35 discussion, and if necessary, by a third author (H.V.).  
36  
37  
38  
39  
40  
41  
42

## Study selection

We included studies conducted in academic medical settings in which victims were either consultants or trainees. We defined academic medical settings as hospitals or clinics that were either university-affiliated or involved trainees. In the case of pre-clinical medical students, academic medical settings included the university where medical instruction took place. Studies were included if they described: the method and impact of bullying; the characteristics of perpetrators and victims; or interventions used to address the bullying. Studies that included trainees or consultants in both academic and non-academic settings were included. We excluded editorials, opinion pieces, reviews, conference abstracts, theses, dissertations, and grey literature.

## Data extraction and quality assessment

Two reviewers (T.A, Y.E.) independently extracted data on: study design, setting (academic or non-academic), definition, description and impact of academic bullying, characteristics of perpetrators and victims, barriers and facilitators of bullying, and interventions and their outcomes. Two reviewers independently assessed studies for risk of bias. We assessed before-after studies using the National Heart, Lung, and Blood Institute quality assessment tool<sup>11</sup> and assessed prevalence surveys using the Joanna Briggs Institute critical appraisal tool<sup>12</sup>. We classified survey studies as low risk of bias if at least 8 of 9 criteria were met, medium risk of bias if 7 of 9 were met, and high risk of bias if less than 7 were met. We classified before-after studies as low risk of bias if at least 11 of 12 criteria were met, medium risk of bias if at least 9 of 12 were met, and high risk of bias if less than 9 were met.

## Data synthesis and analysis

We developed a definition for academic bullying through narrative synthesis of the definitions provided by studies included in this systematic review. We pooled the results of surveys on the basis of similarity of survey themes to facilitate a descriptive analysis. For survey studies on the prevalence or impact of bullying, we solely pooled the results of studies that asked respondents about specific bullying behaviours or impacts, respectively. We then separated results by sex and level of training. Group selection was by consensus between authors. We presented our results as numbers and percentages. We calculated the denominators from the total number of individuals who completed surveys on types of bullying behaviours, the impact of bullying, characteristics of bullies and victims, or barriers to addressing academic bullying. The numerators were calculated from the number of individuals who experienced a specific behaviour or impact, were bullied by a perpetrator at a specified level of training, or endorsed a specific reason for not making a formal report. We also reported the number of studies that described each specific bullying behaviour or impact, demographic characteristics of victims and perpetrators, barriers and facilitators of academic bullying, and specific reasons for not making a formal report. We could not perform a meta-analysis due to the conceptual heterogeneity between studies.

## Patient and public involvement

Patients or the public were not involved in the design, conduct, reporting, or dissemination plans of our research.

## Results

7

## Screening results

We identified 1342 unique articles, 68 of which met inclusion criteria. Reasons for exclusion are described in Figure 1.

## Characteristics of included studies

Studies were most frequently set in the USA (reported in 31 studies)<sup>3,13-41</sup> and the UK (reported in 5 studies)<sup>8,42-45</sup> and were set in academic hospitals (reported in 54 studies)<sup>1,3-6,13-15,17,19-21,23,24,26,27,29,30,32-35,37-39,41-65</sup> or in both teaching and non-teaching sites (reported in 14 studies)<sup>8,16,25,28,36,40,66-73</sup>. Twenty-five studies included medical students<sup>3-5,13,15,21,22,24,26,33-35,37,39,48,50,52,57-60,63,64,74,75</sup>, 27 included residents or fellows<sup>1,14,16-18,20,22,23,25,27-32,44,45,49-51,55,56,61,62,65,69,72</sup> and 25 included consultants<sup>6,8,16,19,20,25,28,36,38,40-43,46,47,53,66-73,75</sup> (Table 1).

## Definition of academic bullying

Six papers provided definitions for academic bullying<sup>33,48,50,56,58,63</sup>. Common themes included behaviours where the perpetrator abuses authority to punish the victim through isolation, blocked career advancement, and threats to academic standing. We defined academic bullying as the abuse of authority by a perpetrator who targets the victim in an academic setting through punishing behaviours that include overwork, destabilization, and isolation in order to impede the education or career of the target. Multiple studies used the complete or partial Negative Acts Questionnaire (NAQ), a standardized list of bullying behaviours (reported in 24 studies)<sup>1,3,4,6,13-15,24,29,31,36,47-52,54,55,57,60,61,67,73</sup>.

### Patterns of academic bullying behaviours

There were 35,779 consultant and trainee respondents to surveys of bullying behaviours (reported in 28 studies), but not all were offered the same options to select from (Table 2). Bullying behaviours were grouped into destabilization (reported in 15 studies), threats to professional status (reported in 23 studies), overwork (reported in 7 studies), and isolation (reported in 17 studies). Undue pressure to produce work was commonly reported (38.2% of respondents affected, reported in 7 studies)<sup>14,36,45,47,49,54,67</sup>. Of the 15 studies that described destabilization, common methods included being ordered to work below one's competency level (36.1%, reported in 10 studies)<sup>31,36,45,47-49,52,67,71,72</sup> and withholding information that affects performance (30.7%; reported in 9 studies)<sup>14,29,31,36,47-49,54,67</sup>. Of the 23 studies that described threats to professional status, common methods were excessive monitoring (28.8%; reported in 6 studies)<sup>14,36,47,49,54,67</sup> and criticism (26.9%; reported in 12 studies)<sup>14,21,29,36,45,47,49,52,54,67,71,72</sup>. Of the 17 studies that described isolation, the most common method was social and professional exclusion (29.1%; reported in 17 studies)<sup>4,14,21,24,29,31,36,40,47-49,52,54,63,67,70,72</sup>.

There were 6,179 consultant and trainee respondents to surveys that separated the prevalence of bullying behaviours by sex (reported in 11 studies). A greater proportion of women experienced all bullying behaviours (reported in 11 studies)<sup>14,16,19,22,36,40,48,52,57,63,65</sup> (Table 2). There were 34,175 respondents to surveys that analyzed results by level of training (reported in 24 studies) (Supplementary table S1). A greater proportion of consultants experienced refusal of applications for leave, training, or promotion (26.3%, reported in 3 studies)<sup>19,36,47</sup> and removal of areas of responsibility (27.8%, reported in 2 studies)<sup>36,47</sup> than residents

(11.0%, reported in 3 studies; 10.7%, reported in 3 studies, respectively)<sup>14,22,54,55</sup> or medical students (13.4%; 19.6%, reported in 1 study)<sup>22,24</sup>. Compared to medical students (4.6%, reported in 6 studies)<sup>13,15,22,24,52,57</sup> and consultants (3.4%, reported in 2 studies)<sup>36,71</sup>, a greater proportion of residents experienced the intimidatory use of discipline procedures (17.8%, reported in 6 studies)<sup>14,22,48,54,55,65</sup>. A greater proportion of medical students experienced persistent criticism (66.4%, reported in 2 studies)<sup>21,52</sup> than residents (28.3%, reported in 5 studies)<sup>14,29,45,54,72</sup> and consultants (20.8%, reported in 3 studies)<sup>36,47,71</sup>.

### Characteristics of bullies

Thirty-one unique studies representing 15,868 consultants and trainees described the characteristics of bullies, although not all were offered the same options to select from. Common perpetrators included consultants (53.6%, reported in 30 studies)<sup>1,3,4,6,8,14,15,17,18,20,22,27,28,33,37,40,43,45,47-49,52,54,56,60,62,63,66,72,73</sup>, residents (22.0%, reported in 22 studies)<sup>1,3,6,8,15,17,18,20,22,25,27,28,33,37,45,48,49,54,56,60,62</sup>, and nurses (14.9%, reported in 21 studies)<sup>1,3,4,14,15,17,20,22,25,27,28,33,37,45,48,49,54,56,60,62,73</sup>. Of the 4,277 individuals who identified the gender of their bullies, most reported primarily male (67.2%, reported in 5 studies)<sup>8,36,43,47,72</sup>, followed by primarily female (26.1%, reported in 5 studies)<sup>8,36,43,47,72</sup>, and both (6.7%, reported in 3 studies)<sup>8,43,47</sup>. Among 6,084 medical students, perpetrators were commonly consultants (43.1%, reported in 8 studies)<sup>3,4,15,22,33,37,52,60</sup>, residents (35.7%, reported in 6 studies)<sup>3,15,22,33,37,60</sup>, nurses (12.4%, reported in 7 studies)<sup>3,4,15,22,33,37,60</sup>, and other medical students (8.8%, reported in 5 studies)<sup>3,4,22,52,63</sup>. Among 6,289 residents, perpetrators were commonly consultants (52.2%, reported in 12 studies)<sup>1,14,17,18,22,27,45,48,49,54,56,62</sup>, nurses (24.3%, reported in 11 studies)<sup>1,14,17,22,27,45,48,49,54,56,62</sup>, and other residents (20.6%, reported in

10

12 studies)<sup>1,14,17,18,22,27,45,48,49,54,56,62</sup>. Of the 1,500 consultants, perpetrators were their peers (39.2%, reported in 7 studies)<sup>6,8,40,47,49,66,73</sup>, senior consultants (23.7%, reported in 5 studies)<sup>6,8,40,43,73</sup>, and administration (17.7%, reported in 4 studies)<sup>43,47,49,66</sup>.

Six unique studies representing 1,698 interns and medical students described the prevalence of academic bullying according to the specialty rotation of the learner. Academic bullying was common in surgery (32.9% of respondents, reported in 6 studies)<sup>1,13,34,48,56,60,72</sup>, obstetrics and gynecology (25.5%, reported in 2 studies)<sup>13,60</sup> and internal medicine (21.4%, reported in 5 studies)<sup>1,13,48,56,60,72</sup>.

### Characteristics of victims

Forty-one unique studies described the characteristics of victims, and 29 included the proportion of those who experienced bullying. Of the 15,704 women and 19,495 men who responded to surveys that analyzed results by sex, women were more likely to report being bullied than men (54.6% of all women compared to 34.2% of all men, reported in 27 studies)<sup>3,4,14,16,17,19,20,27,28,36,38,41,47-52,55-57,62,63,65,69,72,75</sup>. There were 10,730 consultant and trainee respondents to surveys that separated the results by demographic characteristics other than sex, but not all characteristics were captured by each study. A greater proportion of international graduates / non-citizens experienced bullying than citizens (48.0% compared to 43.3%, reported in 4 studies)<sup>14,17,45,72</sup>, and a greater proportion of overweight participants (BMI > 25) experienced bullying than those with a BMI ≤ 25 (17.8% compared to 11.8%, reported in 1 study)<sup>51</sup>. The relationship between age and bullying varied based on the cut-off used and the survey sample in each study. Among



1  
2  
3 consultants, a greater proportion of those with full professorship experienced bullying than assistant professors (68.0% compared to  
4  
5 51.9%, reported in 1 study)<sup>41</sup>.  
6  
7

### 10 **Impact of academic bullying**

11  
12 There were 24,894 consultant and trainee respondents to surveys on the psychological (reported in 20 studies) and career  
13  
14 impact (reported in 25 studies) of academic bullying (Table 3), although not all were offered the same options to select from.  
15  
16 Respondents commonly reported psychiatric distress (39.2%; reported in 14 studies)<sup>6,17,18,27,29,30,43,47,52,56,59,62,71,73</sup>, considerations of  
17  
18 quitting (35.9%; reported in 7 studies)<sup>25,31,43,47,66,70,72</sup>, and reduced clinical ability (34.6%; reported in 8 studies)<sup>25,30,31,45,47,52,56,59</sup>.  
19  
20 Respondents agreed that academic bullying negatively affected patient safety (68.0%; reported in 2 studies)<sup>18,31</sup>. Nine studies  
21  
22 representing 13,418 individuals described the impact of bullying separated by sex (Table 3). A greater proportion of women  
23  
24 experienced loss of career opportunities (43.6%, reported in 8 studies)<sup>16,19,36,38,40,41,52,65</sup> while a greater proportion of men experienced  
25  
26 decreased confidence (32.1%, reported in 2 studies)<sup>41,52</sup> and clinical ability (26.1%, reported in 1)<sup>52</sup>.  
27  
28  
29  
30  
31  
32

33 There were 16,523 consultant and trainee respondents to surveys that separated results by level of training (Supplementary  
34  
35 table S2). A greater proportion of medical students experienced psychiatric distress (72.9%; reported in 2 studies)<sup>52,59</sup> than residents  
36  
37 (40.8%; reported in 6 studies)<sup>17,18,29,30,56,62</sup> and consultants (17.9%; reported in 4 studies)<sup>43,47,71,73</sup>. A greater proportion of residents  
38  
39  
40  
41  
42

43 12

1  
2  
3 endorsed loss of career opportunities (35.0%; reported in 3 studies)<sup>55,65,72</sup> compared to medical students (16.0%; reported in 3  
4 studies)<sup>13,15,52</sup> and consultants (30.6%; reported in 8 studies)<sup>19,36,38,40,41,47,70,71</sup>.  
5  
6  
7

### 8 9 10 **Barriers and facilitators of academic bullying**

11  
12 Thirty-five unique studies pertained to barriers to victims making a formal report (reported in 26 studies) and institutional  
13 facilitators (reported in 25 studies) of academic bullying (Table 4). There were 9,239 consultant and trainee respondents to surveys on  
14 their actions taken in response to bullying and reasons for not making a formal report, although not all were given the same options to  
15 select from. Victims commonly did not make a formal report<sup>1,3,4,15,36,43,47,49,50,54,56,60,62,66,72</sup>; only 28.9% made a formal report.  
16  
17 Deterrents to reporting included concern regarding career implications (41.1%; reported in 15 studies)<sup>1,4,15,25,28,35,47,48,50,56,62,65,66,70,72</sup>,  
18 not knowing who to report to (26.5%; reported in 15 studies)<sup>1,4,16,22,25,33,47,48,50,56,62,65,66,70,75</sup>, and poor recognition of bullying (11.4%;  
19 reported in 5 studies)<sup>5,15,25,33,35,37,42,48,56</sup>. Of the 26 studies, 7 studies representing 1139 individuals reported the outcomes of  
20 reporting<sup>1,36,43,47,49,65,72</sup> although only a small range of outcomes were offered among options. Submitting a formal report often had no  
21 perceived effect on bullying (35.6%; reported in 5 studies)<sup>36,43,47,49,72</sup> a greater proportion of victims endorsed worsening (21.9%;  
22 reported in 3)<sup>36,49,65</sup> than improvement (13.7%; reported in 5 studies)<sup>1,36,43,49,72</sup> in bullying following reporting.  
23  
24  
25  
26  
27  
28  
29  
30  
31  
32  
33  
34  
35  
36  
37

38 In the 25 unique studies that described institutional facilitators of bullying, common facilitators were lack of enforcement  
39 (reported in 13 studies)<sup>1,16,20,25,28,36,43,47,49,50,54,56,65</sup>, the hierarchical structure of medicine (reported in 7 studies)<sup>26,54,56,57,63,64,71</sup>, and  
40  
41  
42

1  
2  
3 normalization of bullying (reported in 10 studies)<sup>3,15,19,23,26,31,34,47,62,65</sup>. Individual-level data was not pooled as institutional facilitators  
4  
5 of bullying were most commonly elicited via free-response portions of surveys with varying completion rates.  
6  
7

### 8 9 10 **Suggested strategies, interventions, and outcomes**

11  
12 Forty-nine unique studies suggested strategies to address academic bullying. These strategies included promoting anti-bullying  
13 policies (reported in 13 studies)<sup>3,14–16,35,45,53,54,56,58,59,66,71</sup>, education to prevent academic bullying (reported in 20  
14 studies)<sup>1,3,4,14,15,20,25,26,31,33,35,45,48,54,59,63–65,71,72</sup>, establishing an anti-bullying oversight committee (reported in 10  
15 studies)<sup>21,22,26,28,30,34,39,58,69,71</sup>, institutional support for victims (reported in 5 studies)<sup>35,46,58,62,72</sup>, and internal reviews where hospitals  
16 develop targeted solutions for their environment (reported in 5 studies)<sup>15,22,24,60,63</sup> (Supplementary table S3).  
17  
18  
19  
20  
21  
22  
23  
24  
25

26 Of the 49 unique studies, 10 implemented organization-level interventions which included workshops with vignettes to  
27 improve recognition of bullying (reported in 4 studies)<sup>23,37,42,44</sup>; a gender and power abuse committee that established reporting  
28 mechanisms and held mandatory workshops on mistreatment (reported in 1)<sup>3</sup>; a gender equity office to handle reporting (reported in  
29 1)<sup>39</sup>; a professionalism-focused approach that included professionalism in employee contracts and performance reviews and a  
30 professionalism office to handle student complaints (reported in 1)<sup>26</sup>; zero-tolerance policies (reported in 1)<sup>53</sup>; and institutional-level  
31 tracking of mistreatment to provide targeted staff education (reported in 2)<sup>21,24</sup>. All 10 studies had an uncontrolled before-after design,  
32 and as such, did not establish causality. In the studies of vignettes, common bullying behaviours were demonstrated to improve  
33  
34  
35  
36  
37  
38  
39  
40  
41  
42

43 14

1  
2  
3 recognition of both subtle and overt acts of bullying. Of the 4 studies that involved bullying recognition workshops, three reported an  
4 associated improvement in bullying recognition<sup>37,42,44</sup>. In a study that developed a gender equity office, reporting was handled through  
5 an intermediary; decisions were binding with consequences for retaliation including termination of employment<sup>39</sup> and 96% of all  
6 formal reports were resolved. In a study where a Gender and Power Abuse committee was formed, there was an associated reduction  
7 in academic abuse<sup>3</sup>. Similarly, in a study that used a multifaceted approach of developing a professionalism committee, and including  
8 professionalism in contracts and performance reviews, there was a 35.9% decrease in reporting of mistreatment, and improved  
9 awareness of the reporting process<sup>26</sup>. In a study where a clerkship committee monitored unprofessionalism, there was an associated  
10 reduction in narrative comments regarding unprofessionalism on end of rotation surveys<sup>21</sup>. In a study assessing the impact of a  
11 professionalism retreat about mistreatment for consultants, there was no reduction in medical student mistreatment<sup>13</sup>. In a study  
12 assessing the implementation of zero-tolerance policies, there was an associated improvement in awareness of bullying reporting  
13 processes<sup>53</sup>.

### 31 **Assessment of bias**

32  
33 Twenty-eight studies had a low risk of bias<sup>3,4,8,13,16–19,22,27,29,30,36,41,45,47,49–52,55,56,63,66,71–73,75</sup>, 21 had a moderate risk of  
34 bias<sup>1,6,14,15,21,25,28,34,37,38,40,43,46,54,58,59,61,67–70</sup>, and 19 had a high risk of bias<sup>20,23,24,26,31–33,35,37,39,42,44,48,53,57,60,62,64,65</sup>. Among the 58 survey  
35 studies, 14 sampled participants inappropriately<sup>5,6,14,19,33,35,40,46,48,54,57,58,60,62,67</sup>, 19 had inadequate sample sizes or did not justify their  
36 sample size<sup>1,5,6,14,18,25,31,35,40,46,48,50,55,57,60,64,68,69,71</sup>, 7 did not sufficiently describe the participants<sup>1,15,29,31,35,48,58</sup>, 9 had coverage  
37  
38  
39  
40  
41  
42  
43  
44  
45  
46  
47

1  
2  
3 bias<sup>6,14,40,48,54,57,62,64,65</sup>, 8 did not have an appropriate statistical analysis<sup>15,20,28,34,35,64,67,68</sup>, and 30 had a low response rate<sup>1,5,34–</sup>  
4  
5 36,43,45,47,49,52,56,57,14,59–62,65–67,69,70,72,15,16,20,22,28,31,32 (Supplementary figure S2). Among the 10 before-after trials, 1 did not have pre-  
6  
7 specified inclusion criteria<sup>44</sup>, 5 had low sample sizes or did not justify their sample size<sup>23,24,37,42,44</sup>, 3 did not have clearly defined, pre-  
8  
9 specified, consistently measured outcomes<sup>21,24,44</sup>, 9 did not blind participants<sup>3,23,24,26,37,39,42,44,53</sup>, 5 did not account for loss to follow-up  
10  
11 in their analysis<sup>23,26,42,44,53</sup>, and 6 lacked statistical tests to assess for significant pre- to post-intervention changes<sup>24,26,39,42,44,53</sup>  
12  
13 (Supplementary figure S3).  
14  
15  
16  
17  
18

## 19 Discussion

20  
21 In this systematic review, we established a definition for academic bullying, identified common patterns of bullying, and  
22  
23 reported the impact on victims. We defined academic bullying as the abuse of authority by a perpetrator who targets the victim in  
24  
25 order to impede their education or career through punishing behaviours that include overwork, destabilization, and isolation in an  
26  
27 academic setting. Victims reported that academic bullying often resulted in stalled career advancement and thoughts of leaving the  
28  
29 position. A majority of academic bullies were senior men, and a majority of victims were women. Barriers to reporting academic  
30  
31 bullying included fear of reprisal, perceived hopelessness, and institutional non-enforcement of anti-bullying policies. Strategies to  
32  
33 overcome academic bullying, such as anti-bullying committees and adding professionalism as a requirement for career advancement,  
34  
35 were associated with an improvement in the prevalence of bullying and resolution of formal reports (Central illustration).  
36  
37  
38  
39  
40  
41  
42  
43

1  
2  
3 Several factors contribute to the prevalence of bullying within academia. The hierarchical structure lends itself to power  
4 imbalances and prevents victims from speaking out, especially when the aggressor is tenured<sup>76</sup>. The relative isolation of departments  
5 within universities allows poor behaviour to go unchecked. Furthermore, the closed networks within departments lend themselves to  
6 mobbing behaviour and causes victims to fear being blacklisted for speaking out<sup>77</sup>.  
7  
8  
9  
10  
11

12  
13  
14 A lack of clarity around the definition can limit awareness and reporting<sup>50</sup>. The Graduation Questionnaire administered to all  
15 American medical students found that in years where respondents were asked if they had been bullied, the estimated prevalence was  
16 lower than when they were asked about specific bullying behaviours<sup>15</sup>. Surveys on bullying should include a list of defining  
17 behaviours to increase clarity and accuracy in responses<sup>78</sup>. Even in institutions with established reporting systems, respondents were  
18 often unaware of how to file a report<sup>47</sup>. We found that victims of academic bullying rarely filed reports, primarily due to fear of  
19 retaliation. Reporting was not consistently effective and was more likely to worsen bullying.  
20  
21  
22  
23  
24  
25  
26  
27  
28  
29  
30

31 We found that consultants were the most common sources of bullying at all levels of training, although residents often bullied  
32 medical students. No studies assessed the relative contribution of fellows and senior residents to resident bullying. Among studies that  
33 analyzed bullying among consultants by seniority, senior consultants were a commonly reported source of bullying<sup>6,8,40,43,73</sup>. Women  
34 and ethnic minorities reported higher rates of bullying among demographic groups surveyed, although racial factors were infrequently  
35 assessed in the surveys included in this study. While some argue that the increasing proportion of women trainees<sup>79,80</sup> may change  
36  
37  
38  
39  
40  
41  
42

1  
2  
3 dynamics in healthcare settings, the leaky academic pipeline in which women remain underrepresented in several academic  
4 specialties and in positions of leadership make them vulnerable to the power dynamics of academic medicine<sup>81</sup>.  
5  
6  
7

8  
9  
10 Our review illustrates the self-reported harms of academic bullying. Victims experienced depressive symptoms, self-perceived  
11 loss of clinical ability, and termination of employment. Academic bullying has been linked to depression<sup>51</sup>, substance abuse<sup>82</sup>, and  
12 hospitalization for coronary artery or cerebrovascular disease<sup>83</sup>. Bullying costs the National Health Service (NHS) of the United  
13 Kingdom £325 million annually due to reduced performance and increased staff turnover<sup>84</sup>. Disruptive behavior, linked to bullying in  
14 the perioperative setting has been linked to 27% of patient deaths, 67% of adverse events, and 71% of medical errors<sup>7</sup>. Reasons for  
15 consultant error include intimidation leading to a fear of communicating sources of harm and slow response times<sup>85</sup>. We found that  
16 academic bullying negatively impacted patient safety. In a study of emergency medicine residents, 90% reported examples in which  
17 disruptive behaviour affected patient care, and 51% were less likely to call an abusive consultant<sup>18</sup>.  
18  
19  
20  
21  
22  
23  
24  
25  
26  
27  
28  
29  
30

31 Interventions reported as effective were simple, non-resource intensive, and organization-level, such as anti-bullying  
32 workshops and committees. Anti-bullying committees involving staff and learners can research bullying within their institution and  
33 address the most common disruptive behaviours through targeted interventions<sup>67</sup>. An organization-level, rather than individual-level  
34 approach may address the root causes of academic bullying as well as the organizational culture that facilitates ongoing bullying. We  
35 found that anti-bullying committees typically included three elements: (1) a multidisciplinary team that includes clinicians and other  
36  
37  
38  
39  
40  
41

1  
2  
3 front-line staff; (2) development of anti-bullying policies and a reporting process; and (3) an education campaign to promote  
4 awareness of policies. Owing to their multifaceted nature, it is challenging to evaluate the relative contributions of their components.  
5  
6 Furthermore, without well-designed trials, the effect of anti-bullying committees is unknown.  
7  
8  
9

10  
11  
12 The need for a confidential reporting process was raised in the studies included in this review, but few described how  
13 confidentiality could be maintained when the report has to describe details of the bullying that may be only privy to the perpetrator  
14 and victim. The reporting process could take the form of the Office of Gender Equity at the University of California, where the  
15 accuser and the accused do not meet face to face; the discipline process is through an intermediary<sup>39</sup>. A unique, non-punitive approach  
16 is the restorative justice approach used at Dalhousie University where victims, offenders, and administrators work collaboratively to  
17 address sexual harassment and re-integrate offenders<sup>86</sup>. Reporting may have been ineffective in this review due to the impunity offered  
18 to prominent consultants. Senior personnel, particularly those who are well-known and successful in grant funding, are often  
19 considered “untouchable”, beyond reproach by their institutions<sup>87</sup>. Behaviour is often learned and modeling positive behaviours may  
20 break the cycle of bullying in medicine<sup>88</sup>. One approach would be making professionalism a requirement for promotion and career  
21 advancement, as in the Department of Medicine at the University of Toronto in Canada<sup>89</sup> or the University of Colorado School of  
22 Medicine<sup>26</sup>.  
23  
24  
25  
26  
27  
28  
29  
30  
31  
32  
33  
34  
35  
36  
37  
38  
39

#### 40 **Strengths and limitations**

41  
42  
43 19



1  
2  
3 The strengths of this review include its broad scope; capturing several aspects of academic bullying, and its size (n = 68  
4 studies, 82,349 consultants and trainees). The cohort included was diverse, comprising several specialties and countries. We explicitly  
5 defined eligibility criteria and extracted data in duplicate. We used established tools to assess the risk of bias.  
6  
7

8  
9  
10  
11  
12 There are several limitations that should be acknowledged. There is no validated definition of bullying, and the included  
13 studies varied in their description of bullying. Most studies used questionnaires that were not previously validated. The survey  
14 instruments across studies differed from each other, and their results had to be pooled according to themes to be synthesized. We  
15 could not account for differences in institutional culture and hospital systems in the responses of survey participants. Data on  
16 bully/victim demographics were underrepresented. Selection bias was a significant concern: 14 studies used convenience sampling,  
17 and 2 included voluntary focus groups for victims of bullying to sign up for. Overall, the response rate was 59.2%, with a range of  
18 12% to 100%. Surrogate outcomes were used such as awareness of bullying, and the reporting of outcomes was inconsistent. As such,  
19 the effect of anti-bullying interventions must be interpreted cautiously.  
20  
21  
22  
23  
24  
25  
26  
27  
28  
29  
30  
31  
32

### 33 **Future directions**

34  
35 Significant gaps exist in the quality of the academic bullying literature, particularly with inconsistent definitions and  
36 limitations in study methodology. Our definition may be used to provide the breadth and granularity required to sufficiently capture  
37 cases of academic bullying in medicine. Studies on the impact of academic bullying would benefit from standardized, validated survey  
38  
39  
40  
41  
42

43 20

1  
2  
3 instruments. Although randomization and blinding are not always possible to test the effect of interventions, a control group should be  
4  
5 included in anti-bullying intervention studies.  
6  
7

### 10 **Conclusions:**

11  
12 Academic bullying refers to specific behaviours that disrupt the learning or career of the intended target and commonly  
13  
14 consists of exclusion and overwork. The consequences include significant psychiatric distress and loss of career opportunities. Bullies  
15  
16 tend to be male senior consultants, whereas victims tend to be females. The fear of reprisal and non-enforcement of anti-bullying  
17  
18 policies are the greatest barriers to addressing academic bullying. Results of bullying interventions must be interpreted with caution  
19  
20 due to their methodological quality and reliance on surrogate measures. There is a need for well-designed trials with transparent  
21  
22 reporting of relevant outcomes and accounting for temporal trends.  
23  
24  
25  
26  
27

### 28 **Author contributions**

29  
30 TA contributed to study design, informed the search strategy, extracted and synthesized study data, and drafted and edited the  
31  
32 manuscript. YE informed the search strategy, extracted and synthesized study data, and edited the manuscript. HGCV conceived the  
33  
34 study idea, informed the search strategy, analyzed the data, drafted and edited the manuscript, and supervised the conduct of the study.  
35  
36 HGCV affirms that the manuscript is an honest, accurate, and transparent account of the study being reported; that no important  
37  
38 aspects of the study have been omitted; and that any discrepancies from the study as planned have been explained.  
39  
40  
41  
42

43 21

### Sources of funding

HGCV receives support from the Canadian Institutes of Health Research, the Heart and Stroke Foundation, the Women As One Escalator Award, and McMaster Department of Medicine.

### Competing interests

All authors have reported that they have no relationships relevant to the contents of this paper to disclose.

### Ethical approval

Not required.

### Data sharing

All data relevant to the study are included in the article.

## References

1. Scott J, Blanshard C, Child S. Workplace bullying of junior doctors: a cross-sectional questionnaire survey. *J New Zeal Med Assoc.* 2008;121(1282):10–4.
2. Lewis D. Workplace bullying. *Body Qual Res.* 2019;42(4):91–106.
3. Fried J, Vermillion M, Parker N, Uijtdehaage S. Eradicating Medical Student Mistreatment: A Longitudinal Study of One Institution's Efforts. *Acad Med.* 2012;87(9):1191–8.
4. Oku AO, Owoaje ET, Oku OO, Monjok E. Mistreatment among undergraduate medical trainees: A case study of a Nigerian medical school. *Niger J Clin Pract.* 2014;17(6):678–82.
5. Kulaylat AN, Qin D, Sun SX, Hollenbeak CS, Schubart JR, Aboud AJ, et al. Perceptions of mistreatment among trainees vary at different stages of clinical training. *BMC Med Educ* [Internet]. 2017;17(1):1–6. Available from: <http://dx.doi.org/10.1186/s12909-016-0853-4>
6. Malinauskiene, V., Bernotaite L., Leisyte P. Bullying Behavior and Mental Health. *Med Pr.* 2017;68(3):307–14.
7. Lavelle-Jones M. Bullying and Undermining Campaign – Let's Remove it [Internet]. The Royal College of Surgeons of Edinburgh. 2017 [cited 2019 Mar 3]. p. 1–2. Available from: <https://www.rcsed.ac.uk/news-public-affairs/news/2017/june/bullying-and-undermining-campaign-let-s-remove-it>
8. Quine L. Workplace bullying in NHS community trust: staff questionnaire survey. *Bmj* [Internet]. 1999;318(7178):228–32. Available from: <http://www.bmj.com/cgi/doi/10.1136/bmj.318.7178.228>

- 1  
2  
3 9. Okechukwu CA, Souza K, Davis KD, de Castro AB. Discrimination, Harassment, Abuse and Bullying in the Workplace:  
4  
5 Contribution of Workplace Injustice to Occupational Health Disparities. *Am J Ind Med.* 2014;57(5):573–86.  
6
- 7  
8 10. McKay R, Arnold DH, Fratzl J, Thomas R. Workplace bullying in academia: A Canadian study. *Empl Responsib Rights J.*  
9  
10 2008;20(2):77–100.  
11
- 12 11. Quality Assessment Tool for Before-After (Pre-Post) Studies With No Control Group [Internet]. National Heart, Lung, and  
13  
14 Blood Institute. Available from: <https://www.nhlbi.nih.gov/health-topics/study-quality-assessment-tools>  
15
- 16  
17 12. Checklist for Prevalence Studies [Internet]. Joanna Briggs Institute. Available from: [http://joannabriggs.org/research/critical-](http://joannabriggs.org/research/critical-appraisal-tools.html)  
18  
19 [appraisal-tools.html](http://joannabriggs.org/research/critical-appraisal-tools.html)  
20
- 21  
22 13. Oser TK, Haidet P, Lewis PR, Mauger DT, Gingrich DL, Leong SL. Frequency and negative impact of medical student  
23  
24 mistreatment based on specialty choice: A longitudinal study. *Acad Med.* 2014;89(5):755–61.  
25
- 26  
27 14. Chadaga AR, Villines D, Krikorian A. Bullying in the American Graduate Medical Education System: A National Cross-  
28  
29 Sectional Survey. *PLoS One.* 2016;11(3):e0150246.  
30
- 31  
32 15. Mavis B, Sousa A, Lipscomb W, Rappley MD. Learning about medical student mistreatment from responses to the medical  
33  
34 school graduation questionnaire. *Acad Med.* 2014;89(5):705–11.  
35
- 36  
37 16. Stasenko M, Tarney C, Seier K, Casablanca Y, Brown CL. Sexual harassment and gender discrimination in gynecologic  
38  
39 oncology. *Gynecol Oncol* [Internet]. 2020;159(2):317–21. Available from: <https://doi.org/10.1016/j.ygyno.2020.08.014>  
40
- 41  
42 17. Kemper KJ, Schwartz A. Bullying, Discrimination, Sexual Harassment, and Physical Violence: Common and Associated With  
43  
44

24

- 1  
2  
3 Burnout in Pediatric Residents. *Acad Pediatr* [Internet]. 2020;20(7):991–7. Available from:  
4  
5 <https://doi.org/10.1016/j.acap.2020.02.023>  
6  
7
- 8 18. Huber M, Lopez J, Messman A, Xu TK, McLaughlin T, Richman P. Emergency Medicine Resident Perception of Abuse by  
9  
10 Consultants: Results of a National Survey. *Ann Emerg Med*. 2020;76(6):814–5.  
11
- 12 19. Raj A, Freund KM, McDonald JM, Carr PL. Effects of sexual harassment on advancement of women in academic medicine: A  
13  
14 multi-institutional longitudinal study. *EClinicalMedicine* [Internet]. 2020;20:100298. Available from:  
15  
16 <https://doi.org/10.1016/j.eclinm.2020.100298>  
17  
18
- 19 20. D’Agostino JP, Vakharia KT, Bawa S, Sljivic S, Natoli N. Intimidation and Sexual Harassment during Plastic Surgery Training  
20  
21 in the United States. *Plast Reconstr Surg - Glob Open*. 2019;7(12):e2493.  
22
- 23 21. Kappy MD, Holman E, Kempner S, Santen SA, Skinner B, Hammoud M. Identifying Medical Student Mistreatment in the  
24  
25 Obstetrics and Gynecology Clerkship. *J Surg Educ* [Internet]. 2019;76(6):1516–25. Available from:  
26  
27 <https://doi.org/10.1016/j.jsurg.2019.04.010>  
28  
29
- 30 22. Hammoud MM, Appelbaum NP, Wallach PM, Burrows HL, Kochhar K, Hemphill RR, et al. Incidence of resident mistreatment  
31  
32 in the learning environment across three institutions. *Med Teach* [Internet]. 2020;0(0):1–7. Available from:  
33  
34 <https://doi.org/10.1080/0142159X.2020.1845306>  
35  
36
- 37 23. Castillo-Angeles M, Calvillo-Ortiz R, Acosta D, Watkins AA, Evenson A, Atkins KM, et al. Mistreatment and the Learning  
38  
39 Environment: A Mixed Methods Approach to Assess Knowledge and Raise Awareness Amongst Residents. *J Surg Educ*  
40  
41  
42

- 1  
2  
3 [Internet]. 2019;76(2):305–14. Available from: <https://doi.org/10.1016/j.jsurg.2018.07.019>  
4  
5  
6 24. House J, Griffith M, Kappy M, Holman E, Santen S. Tracking Student Mistreatment Data to Improve the Emergency Medicine  
7  
8 Clerkship Learning Environment. *West J Emerg Med* [Internet]. 2018;19(January):18–22. Available from:  
9  
10 <https://escholarship.org/uc/item/9md5263b>  
11  
12 25. Zurayk LF, Cheng KL, Zemplenyi M, Burke A, Dillon JK. Perceptions of Sexual Harassment in Oral and Maxillofacial Surgery  
13  
14 Training and Practice. *J Oral Maxillofac Surg* [Internet]. 2019;77(12):2377–85. Available from:  
15  
16 <https://doi.org/10.1016/j.joms.2019.08.019>  
17  
18  
19 26. Lind KT, Osborne CM, Badesch B, Blood A, Lowenstein SR. Ending student mistreatment: early successes and continuing  
20  
21 challenges. *Med Educ Online* [Internet]. 2020;25(1). Available from: <https://doi.org/10.1080/10872981.2019.1690846>  
22  
23  
24 27. Hu Y-Y, Ellis RJ, Hewitt DB, Yang AD, Cheung EO, Moskowitz JT, et al. Discrimination, Abuse, Harassment, and Burnout in  
25  
26 Surgical Residency Training. *N Engl J Med*. 2019;381(18):1741–52.  
27  
28  
29 28. Balch Samora J, Van Heest A, Weber K, Ross W, Huff T, Carter C. Harassment, Discrimination, and Bullying in Orthopaedics:  
30  
31 A Work Environment and Culture Survey. *J Am Acad Orthop Surg*. 2020;28(24):e1097–104.  
32  
33  
34 29. Zhang LM, Ellis RJ, Ma M. Prevalence, Types, and Sources of Bullying Reported by US General Surgery Residents in 2019.  
35  
36 *JAMA*. 2020;323(20):2093–5.  
37  
38  
39 30. Ayyala MS, Rios R, Wright SM. Perceived Bullying Among Internal Medicine Residents. *JAMA - J Am Med Assoc*.  
40  
41 2019;322(6):576–8.  
42  
43  
44  
45  
46  
47

- 1  
2  
3 31. Chowdhury ML, Husainat MM, Suson KD. Workplace Bullying of Urology Residents: Implications for the Patient and  
4 Provider. *Urology* [Internet]. 2019;127:30–5. Available from: <https://doi.org/10.1016/j.urology.2018.11.062>  
5  
6  
7  
8 32. Wolfman DJ, Parikh JR. Resident bullying in diagnostic radiology. *Clin Imaging* [Internet]. 2019;55(September 2018):47–52.  
9 Available from: <https://doi.org/10.1016/j.clinimag.2019.01.024>  
10  
11  
12 33. Chung MP, Thang CK, Vermillion M, Fried JM, Uijtdehaage S. Exploring medical students’ barriers to reporting mistreatment  
13 during clerkships: a qualitative study. *Med Educ Online* [Internet]. 2018;23(1). Available from:  
14 <https://doi.org/10.1080/10872981.2018.1478170>  
15  
16  
17  
18 34. Kemp MT, Smith M, Kizy S, Englesbe M, Reddy RM. Reported Mistreatment During the Surgery Clerkship Varies by Student  
19 Career Choice. *J Surg Educ* [Internet]. 2018;75(4):918–23. Available from: <http://dx.doi.org/10.1016/j.jsurg.2017.10.011>  
20  
21  
22  
23 35. Wear D, Aultman J. Sexual Harassment in Academic Medicine: Persistence, Non-Reporting, and Institutional Response. *Med*  
24 *Educ Online* [Internet]. 2005;10:1–11. Available from: <http://med-ed-online.net/index.php/meo/article/view/4377>  
25  
26  
27  
28 36. Rouse LP, Gallagher-Garza S, Gebhard RE, Harrison SL, Wallace LS. Workplace Bullying Among Family Physicians: A  
29 Gender Focused Study. *J Women’s Heal* [Internet]. 2016;25(9):882–8. Available from:  
30 <http://online.liebertpub.com/doi/10.1089/jwh.2015.5577>  
31  
32  
33  
34 37. Kulaylat AN, Qin D, Sun SX, Hollenbeak CS, Schubart JR, Aboud AJ, et al. Aligning perceptions of mistreatment among  
35 incoming medical trainees. *J Surg Res* [Internet]. 2017;208:151–7. Available from: <http://dx.doi.org/10.1016/j.jss.2016.09.016>  
36  
37  
38  
39 38. Jagsi R, Griffith KA, Jones R, Perumalswami CR, Ubel P, Stewart A. Sexual harassment and discrimination experiences of  
40  
41  
42  
43 27



- 1  
2  
3 academic medical faculty. *JAMA - J Am Med Assoc.* 2016;315(19):2120–1.  
4  
5  
6 39. Best CL, Smith DW, Raymond JR, Greenberg RS, Crouch RK. Preventing and responding to complaints of sexual harassment  
7  
8 in an academic health center: A 10-year review from the medical university of South Carolina. *Acad Med* [Internet].  
9  
10 2010;85(4):721–7. Available from: [https://www.scopus.com/inward/record.uri?eid=2-s2.0-](https://www.scopus.com/inward/record.uri?eid=2-s2.0-77951689419&partnerID=40&md5=97e206986f1b9d460bd010dad33d83f3)  
11  
12 [77951689419&partnerID=40&md5=97e206986f1b9d460bd010dad33d83f3](https://www.scopus.com/inward/record.uri?eid=2-s2.0-77951689419&partnerID=40&md5=97e206986f1b9d460bd010dad33d83f3)  
13  
14  
15 40. Shrier DK, Zucker AN, Mercurio AE, Landry LJ, Rich M, Shrier LA. Generation to Generation: Discrimination and  
16  
17 Harassment Experiences of Physician Mothers and Their Physician Daughters. *J Women’s Heal* [Internet]. 2007;16(6):883–94.  
18  
19 Available from: <http://www.liebertonline.com/doi/abs/10.1089/jwh.2006.0127>  
20  
21  
22 41. Carr PL, Ash AS, Friedman RH, Szalacha L, Barnett RC, Palepu A, et al. Faculty Perceptions of Gender Discrimination and  
23  
24 Sexual Harassment in Academic Medicine. *Ann Intern Med.* 2000;132(11):889–96.  
25  
26  
27 42. Benmore G, Henderson S, Mountfield J, Wink B. The Stopit! programme to reduce bullying and undermining behaviour in  
28  
29 hospitals: Contexts, mechanisms and outcomes. *J Health Organ Manag.* 2018;32(3):428–43.  
30  
31  
32 43. Shabazz T, Parry-Smith W, Oates S, Henderson S, Mountfield J. Consultants as victims of bullying and undermining: A survey  
33  
34 of Royal College of Obstetricians and Gynaecologists consultant experiences. *BMJ Open.* 2016;6(6).  
35  
36  
37 44. Cresswell K, Sivashanmugarajan V, Lodhi W, Yoong W. Bullying workshops for obstetric trainees: A way forward. *Clin*  
38  
39 *Teach.* 2015;12(2):83–7.  
40  
41  
42 45. Cheema S, Ahmad K, Naqvi SA. Bullying of Junior Doctors Prevails in Irish Health System: A Bitter Reality. *Ir Med J.*  
43  
44  
45  
46  
47

- 2005;98(9):12–4.
46. Duru P, Ocaktan ME, Çelen Ü, Örsal Ö. The Effect of Workplace Bullying Perception on Psychological Symptoms: A Structural Equation Approach. *Saf Health Work*. 2018;9(2):210–5.
47. Chambers CNL, Frampton CMA, McKee M, Barclay M. It feels like being trapped in an abusive relationship’: Bullying prevalence and consequences in the New Zealand senior medical workforce: A cross-sectional study. *BMJ Open*. 2018;8(3).
48. Al-Shafae M, Al-Kaabi Y, Al-Farsi Y, White G, Al-Maniri A, Al-Sinawi H, et al. Pilot study on the prevalence of abuse and mistreatment during clinical internship: A cross-sectional study among first year residents in Oman. *BMJ Open*. 2013;3(2):1–7.
49. Ling M, Young CJ, Shepherd HL, Mak C, Saw RPM. Workplace Bullying in Surgery. *World J Surg*. 2016;40(11):2560–6.
50. Ahmadipour H, Vafadar R. Why mistreatment of medical students is not reported in clinical settings: perspectives of trainees. *Indian J Med Ethics* [Internet]. 2016;I(4):215–8. Available from: <http://ijme.in/articles/why-mistreatment-of-medical-students-is-not-reported-in-clinical-settings-perspectives-of-trainees/?galley=html>
51. Loerbroks A, Weigl M, Li J, Glaser J, Degen C, Angerer P. Workplace bullying and depressive symptoms: A prospective study among junior physicians in Germany. *J Psychosom Res* [Internet]. 2015;78(2):168–72. Available from: <http://dx.doi.org/10.1016/j.jpsychores.2014.10.008>
52. Owoaje ET, Uchendu OC, Ige OK. Experiences of mistreatment among medical students in a university in south west Nigeria. *Niger J Clin Pract*. 2012;15(2):214–9.
53. Meloni M, Austin M. Implementation and outcomes of a zero tolerance of bullying and harassment program. *Aust Heal Rev*.

- 2011;35(1):92–4.
54. Imran N, Jawaid M, Haider II, Masood Z. Bullying of junior doctors in Pakistan : A cross- sectional survey. Singapore Med J [Internet]. 2010;51(7):592–5. Available from: <https://www.ncbi.nlm.nih.gov/pubmed/20730401>
55. Ogunsemi OO, Alebiosu OC, Shorunmu OT. A survey of perceived stress, intimidation, harassment and well-being of resident doctors in a nigerian teaching hospital. Niger J Clin Pract. 2010;13(2):183–6.
56. Nagata-Kobayashi S, Maeno T, Yoshizu M, Shimbo T. Universal problems during residency: Abuse and harassment. Med Educ. 2009;43(7):628–36.
57. Rautio A, Sunnari V, Nuutinen M, Laitala M. Mistreatment of university students most common during medical studies. BMC Med Educ. 2005;5:1–12.
58. Kapoor S, Ajinkya S, Jadhav PR. Bullying and victimization trends in undergraduate medical students ??? A self-reported cross-sectional observational survey. J Clin Diagnostic Res. 2016;10(2):VC05–8.
59. Peres MF, Babler F, Arakaki JN, Quaresma IY, Barreto AD, Silva AT E-NJ. Mistreatment in an academic setting and medical students’ perceptions about their course in São Paulo, Brazil: a cross-sectional study. Sao Paulo Med J. 2016;134(2):130–7.
60. Gan R, Snell L. When the learning environment is suboptimal: Exploring medical students’ perceptions of “mistreatment.” Acad Med. 2014;89(4):608–17.
61. Dikmetaş E, Top M, Ergin G. An examination of mobbing and burnout of residents. Turk Psikiyat Derg. 2011;22(3):137–49.
62. Llewellyn A, Karageorge A, Nash L, Li W, Neuen D. Bullying and sexual harassment of junior doctors in New South Wales,

- 1  
2  
3 Australia: Rate and reporting outcomes. *Aust Heal Rev*. 2018;(September 2017).  
4  
5  
6 63. Elghazally NM, Atallah AO. Bullying among undergraduate medical students at Tanta University, Egypt: a cross-sectional  
7  
8 study. *Libyan J Med [Internet]*. 2020;15(1). Available from: <https://doi.org/10.1080/19932820.2020.1816045>  
9  
10 64. Colenbrander L, Causer L, Haire B. “If you can’t make it, you’re not tough enough to do medicine”: A qualitative study of  
11  
12 Sydney-based medical students’ experiences of bullying and harassment in clinical settings. *BMC Med Educ*. 2020;20(1):1–12.  
13  
14 65. Brown A, Bonneville G, Glaze S. Nevertheless, They Persisted: How Women Experience Gender-Based Discrimination During  
15  
16 Postgraduate Surgical Training. *J Surg Educ [Internet]*. 2021;78(1):17–34. Available from:  
17  
18 <https://doi.org/10.1016/j.jsurg.2020.06.027>  
19  
20 66. Askew DA, Schluter PJ, Dick ML, ??go PM, Turner C, Wilkinson D. Bullying in the Australian medical workforce: Cross-  
21  
22 sectional data from an Australian e-Cohort study. *Aust Heal Rev*. 2012;36(2):197–204.  
23  
24 67. Eriksen GS, Nygreen I, Webster RF. Bullying Among Hospital Staff: Use of Psychometric Triage to Identify Intervention  
25  
26 Priorities. *Psychom Triage Bullying Electron J Appl Psychol*. 2011;7(2):26–31.  
27  
28 68. Iqbal A, Khattak A, Malik FR. Bullying Behaviour In Operating Theatres. *J Ayub Med Coll Abbottabad*. 2020;32(3):352–5.  
29  
30 69. Brown J, Drury L, Raub K, Levy B, Brantner P, Krivak TC, et al. Workplace Harassment and Discrimination in Gynecology:  
31  
32 Results of the AAGL Member Survey. *J Minim Invasive Gynecol [Internet]*. 2019;26(5):838–46. Available from:  
33  
34 <https://doi.org/10.1016/j.jmig.2019.03.004>  
35  
36 70. Chrysafi P, Simou E, Makris M, Malietzis G, Makris GC. Bullying and Sexual Discrimination in the Greek Health Care  
37  
38  
39  
40  
41  
42  
43 31

- 1  
2  
3 System. *J Surg Educ.* 2017;74(4):690–7.  
4  
5  
6 71. Gadit AAM, Mugford G. A pilot study of bullying and harassment among medical professionals in Pakistan, focussing on  
7  
8 psychiatry: Need for a medical ombudsman. *J Med Ethics.* 2008;34(6):463–6.  
9  
10  
11 72. Crebbin W, Campbell G, Hillis DA, Watters DA. Prevalence of bullying, discrimination and sexual harassment in surgery in  
12  
13 Australasia. *ANZ J Surg.* 2015;85(12):905–9.  
14  
15 73. Malinauskiene V, Bernotaite L. Workplace bullying and posttraumatic stress symptoms among family physicians in Lithuania.  
16  
17 *Occup Environ Med* [Internet]. 2014;71(6):A113. Available from:  
18  
19 <http://shibboleth.ovid.com/secure/?T=JS&CSC=Y&NEWS=N&PAGE=fulltext&D=emed12&AN=71745305%5Cnhttp://sfx.kc>  
20  
21 [l.ac.uk/kings?sid=OVID:embase&id=pmid:&id=doi:10.1136/oemed-2014-](http://l.ac.uk/kings?sid=OVID:embase&id=pmid:&id=doi:10.1136/oemed-2014-)  
22  
23 [102362.356&genre=article&atitle=Workplace+bullying+and+posttraumatic+stress+symptoms+a](http://l.ac.uk/kings?sid=OVID:embase&id=pmid:&id=doi:10.1136/oemed-2014-102362.356&genre=article&atitle=Workplace+bullying+and+posttraumatic+stress+symptoms+a)  
24  
25  
26 74. Aaronson KD, Cowger J. Heart failure prognostic models why bother? *Circ Hear Fail.* 2012;5(1):6–9.  
27  
28 75. Afkhamzadeh A, Mohamadi Bolbanabad A, Moloudi B, Safari H, Piroozi B. Workplace violence against physicians and  
29  
30 medical students in west part of Iran. *Int J Hum Rights Healthc.* 2019;12(2):116–23.  
31  
32  
33 76. Sharma M. Workplace Bullying: An exploratory study in Australian academia. *Grants Regist* 2020. 2019;315–6.  
34  
35 77. Khoo SB. Academic mobbing: Hidden health hazard at workplace. *Malaysian Fam Physician.* 2010;5(2):61–7.  
36  
37 78. GMC. National training survey 2014. *Gen Med Counc.* 2014;  
38  
39 79. Association of American Medical Colleges (AAMC). The Majority of U.S. Medical Students Are Women. 2019.  
40  
41  
42  
43  
44  
45  
46  
47

- 1  
2  
3 80. Jefferson L, Bloor K, Maynard A. Women in medicine: Historical perspectives and recent trends. *Br Med Bull*. 2015;  
4  
5 81. Girod S, Fassiotto M, Grewal D, Ku MC, Sriram N, Nosek BA, et al. Reducing implicit gender leadership bias in academic  
6 medicine with an educational intervention. *Acad Med*. 2016;91(8):1143–50.  
7  
8 82. Niedhammer I, David S, Degioanni S, Drummond A, Philip P. Workplace bullying and psychotropic drug use: The mediating  
9 role of physical and mental health status. *Ann Occup Hyg*. 2011;55(2):152–63.  
10  
11 83. Xu T, Magnusson Hanson LL, Lange T, Starkopf L, Westerlund H, Madsen IEH, et al. Workplace bullying and workplace  
12 violence as risk factors for cardiovascular disease: a multi-cohort study. *Eur Heart J*. 2018;0(1):1–12.  
13  
14 84. Mistry M, Latoo J. Bullying : a growing workplace menace. *Br J Med Pract*. 2009;2(1):23–6.  
15  
16 85. Rosenstein AH. Physician disruptive behaviors: Five year progress report. *World J Clin Cases* [Internet]. 2015;3(11):930.  
17 Available from: <http://www.wjgnet.com/2307-8960/full/v3/i11/930.htm>  
18  
19 86. Acosta D, Karp DR. Restorative Justice as the Rx for Mistreatment in Academic Medicine: Applications to Consider for  
20 Learners, Faculty, and Staff. *Acad Med*. 2018;354–6.  
21  
22 87. Watters DAK, Hillis DJ. Discrimination, bullying and sexual harassment: Where next for medical leadership? *Med J Aust*.  
23 2015;203(4):175-175e.1.  
24  
25 88. Lehmann LS, Sulmasy LS, Desai S, Ethics ACP. Annals of Internal Medicine Hidden Curricula , Ethics , and Professionalism :  
26 Optimizing Clinical Learning Environments in Becoming and Being a Physician : A Position Paper of the American College of  
27 Physicians. *Ann Intern Med*. 2018;168(7):506–8.  
28  
29  
30  
31  
32  
33  
34  
35  
36  
37  
38  
39  
40  
41  
42  
43  
44  
45  
46  
47

- 1  
2  
3 89. Singer H. Addressing unprofessional behaviour among physicians [Internet]. St. Michael's Hospital. 2018 [cited 2019 Mar 2].  
4  
5 Available from: [http://stmichaelshospital.com/media/detail.php?source=hospital\\_news/2018/0730](http://stmichaelshospital.com/media/detail.php?source=hospital_news/2018/0730)  
6  
7  
8  
9  
10  
11  
12  
13  
14  
15  
16  
17  
18  
19  
20  
21  
22  
23  
24  
25  
26  
27  
28  
29  
30  
31  
32  
33  
34  
35  
36  
37  
38  
39  
40  
41  
42

**Table 1. Summary of studies investigating bullying in academic medicine**

| Author (year), Country     | Study design | Setting                             | Definition of academic bullying                        | Target                              | Perpetrator                                                                                                                                                                                                                                                                             | Source of bias                          | Risk of Bias |
|----------------------------|--------------|-------------------------------------|--------------------------------------------------------|-------------------------------------|-----------------------------------------------------------------------------------------------------------------------------------------------------------------------------------------------------------------------------------------------------------------------------------------|-----------------------------------------|--------------|
| Huber et al. (2020), USA   | Survey       | Academic and non-academic hospitals | Data not provided                                      | Residents                           | Consultant (83%) and resident (63%)                                                                                                                                                                                                                                                     | Inadequate sample size                  | Low          |
| Hammoud et al. (2020), USA | Survey       | Academic hospitals                  | Study based graduation questionnaire                   | Residents and medical students      | For resident victims: consultant (58.7%), resident (27.9%), nurses (26.4%), other employees (10.2%), and administration (5.4%). For medical student victims: consultant (66.4%), resident (50.9%), nurses (22.4%), other employees (13.8%), administration (5.2%), and students (12.0%) | Low response rate                       | Low          |
| Samora et al. (2020), USA  | Survey       | Academic hospitals                  | A behavior that a reasonable person would expect might | Residents, fellows, and consultants | Multiple*                                                                                                                                                                                                                                                                               | Inappropriate statistical analysis, and | Moderate     |



1  
2  
3  
4  
5  
6  
7  
8  
9  
10  
11  
12  
13  
14  
15  
16  
17  
18  
19  
20  
21  
22  
23  
24  
25  
26  
27  
28  
29  
30  
31  
32  
33  
34  
35  
36  
37  
38  
39  
40  
41  
42  
43  
44  
45  
46  
47

|                             |              |                                     |                                                                                                                                                                                |                  |                                                       |                                                                                                                                                |      |
|-----------------------------|--------------|-------------------------------------|--------------------------------------------------------------------------------------------------------------------------------------------------------------------------------|------------------|-------------------------------------------------------|------------------------------------------------------------------------------------------------------------------------------------------------|------|
|                             |              |                                     | victimize, humiliate, undermine, or threaten a person to whom the behavior is directed                                                                                         |                  |                                                       | low response rate                                                                                                                              |      |
| Brown et al. (2020), Canada | Survey       | Academic hospitals                  | Gender-based discrimination included belittling remarks, inappropriate comments and jokes, denial of opportunities, and behaviors that are perceived as hostile or humiliating | Residents        | Nurses, consultants, and residents                    | Inadequate sample size, analysis not conducted in full coverage of the sample, inappropriate identification of bullying, and low response rate | High |
| Zhang et al. (2020), USA    | Survey       | Academic and non-academic hospitals | NAQ <sup>‡</sup> used                                                                                                                                                          | Residents        | Consultants, co-residents, nurses, and administrators | Study subjects not described in details                                                                                                        | Low  |
| Lind et al. (2020), USA     | Before-After | Academic                            | Public belittlement or humiliation; physical harm; denied opportunities for training or rewards, or receiving lower evaluations or grades, based                               | Medical students | Data not provided                                     | Unblinded outcome assessors, small sample size, high loss to follow-up, and analysis of change score not applied                               | High |

|                                       |        |                                     |                                                                                                                                                             |                  |                                                         |                                                                                                       |          |
|---------------------------------------|--------|-------------------------------------|-------------------------------------------------------------------------------------------------------------------------------------------------------------|------------------|---------------------------------------------------------|-------------------------------------------------------------------------------------------------------|----------|
|                                       |        |                                     | solely on gender; and being subjected to racially or ethnically offensive remarks                                                                           |                  |                                                         |                                                                                                       |          |
| Colenbrander et al. (2020), Australia | Survey | Academic hospitals                  | Data not provided                                                                                                                                           | Medical students | Data not provided                                       | Inadequate sample size, analysis plan, data analysis coverage, and unreliable measurement of bullying | High     |
| Iqbal et al. (2020), Pakistan         | Survey | Academic and non-academic hospitals | NAQ* used                                                                                                                                                   | Consultants      | Data not provided                                       | Inadequate sample size and statistical analysis                                                       | Moderate |
| Elghazally et al. (2020), Egypt       | Survey | Academic                            | Behaviour that is intended to cause physical or psychological damage due to the imbalance of power, strength or status between the aggressor and the victim | Medical students | Professors (30.1%), students (51.2%), and staff (18.7%) | None                                                                                                  | Low      |
| Raj et al. (2020), USA                | Survey | Academic                            | Harassment defined as unwanted sexual advances, subtle bribery to                                                                                           | Consultants      | Data not provided                                       | None                                                                                                  | Low      |

|                                 |        |                                     |                                                                                                                                       |                                  |                                                                                           |                                                                                           |      |
|---------------------------------|--------|-------------------------------------|---------------------------------------------------------------------------------------------------------------------------------------|----------------------------------|-------------------------------------------------------------------------------------------|-------------------------------------------------------------------------------------------|------|
|                                 |        |                                     | engage in sexual behavior, threats to engage in sexual behavior, or coercive advances                                                 |                                  |                                                                                           |                                                                                           |      |
| Kemper et al. (2020), USA       | Survey | Academic and non-academic hospitals | Data not provided                                                                                                                     | Residents                        | Faculty (43%), clinical staff (60%), resident (28%), medical student (3%), and admin (9%) | None                                                                                      | Low  |
| Stasenko et al. (2020), USA     | Survey | Academic and non-academic hospitals | Harassment is defined as an unwelcome sexual advances or other forms of physical and verbal aggression that is sexual in nature       | Consultants and fellows          | Data not provided                                                                         | Low response rate                                                                         | Low  |
| Afkhamzadeh et al. (2019), Iran | Survey | Academic hospitals                  | Physical or verbal violence, or bullying                                                                                              | Medical students and consultants | Data not provided                                                                         | None                                                                                      | Low  |
| Wolfman et al. (2019), USA      | Survey | Academic and non-academic hospitals | Repeated negative actions and practices that are carried out as a deliberate act or unconsciously. These behaviors cause humiliation, | Residents                        | Data not provided                                                                         | Inappropriate sampling frame, and identification of bullying condition, low response rate | High |

|                                    |        |                                     |                                                                                            |                                    |                                                                                            |                                                                                    |          |
|------------------------------------|--------|-------------------------------------|--------------------------------------------------------------------------------------------|------------------------------------|--------------------------------------------------------------------------------------------|------------------------------------------------------------------------------------|----------|
|                                    |        |                                     | offense and distress to the target                                                         |                                    |                                                                                            |                                                                                    |          |
| Chowdhury et al. (2019), USA       | Survey | Academic and non-academic hospitals | NAQ* used                                                                                  | Residents                          | Data not provided                                                                          | Inadequate sample size, description of subjects and setting, and low response rate | High     |
| Ayyala et al. (2019), USA          | Survey | Academic and non-academic hospitals | Harassment that occurs repeatedly (> once) by an individual in a position of greater power | Residents                          | Data not provided                                                                          | Inappropriate methods of bullying identification                                   | Low      |
| Hu et al. (2019), USA              | Survey | Academic and non-academic hospitals | Discrimination and harassment on the basis of gender, race, or pregnancy or childcare      | Residents                          | Consultants (52.4%), admin (1.1%), co-residents (20.2%), and nurses (7.9%)                 | None                                                                               | Low      |
| Brown et al. (2019), International | Survey | Academic and non-academic hospitals | Data not provided                                                                          | Residents or fellow and consultant | Data not provided                                                                          | Inappropriate methods of bullying identification and low response rate             | Moderate |
| Zurayk et al. (2019), USA          | Survey | Academic and non-academic clinics   | Study-based sexual experience questionnaire                                                | Consultants and residents          | Residents (60%), lecturers (33%), professors (44%), nurses (10%), and hospital staff (29%) | Inadequate sample size, inappropriate sample frame                                 | Moderate |

1  
2  
3  
4  
5  
6  
7  
8  
9  
10  
11  
12  
13  
14  
15  
16  
17  
18  
19  
20  
21  
22  
23  
24  
25  
26  
27  
28  
29  
30  
31  
32  
33  
34  
35  
36  
37  
38  
39  
40  
41  
42  
43  
44  
45  
46  
47

|                                     |              |                                     |                                                                                                                                          |                                   |                                                                   |                                                                                                               |          |
|-------------------------------------|--------------|-------------------------------------|------------------------------------------------------------------------------------------------------------------------------------------|-----------------------------------|-------------------------------------------------------------------|---------------------------------------------------------------------------------------------------------------|----------|
| Castillo-Angeles et al. (2019), USA | Before-after | Academic hospital                   | Study-based abuse sensitivity questionnaire                                                                                              | Residents                         | Data not provided                                                 | Small sample size, inadequate blinding of outcome assessors, and loss to follow-up                            | High     |
| Kappy et al. (2019), USA            | Before-after | Academic hospital                   | Harassment; discrimination; humiliation; physical punishment; and the use of grading and other forms of assessment in a punitive manner. | Medical students                  | Consultant, co-resident, and nurse                                | Intervention and outcomes not well defined                                                                    | Moderate |
| D'Agostino et al. (2019), USA       | Survey       | Academic and non-academic hospitals | Abuse or harassment particularly of a sexual type                                                                                        | Residents, fellows, and attending | Consultants (64.5%), co-resident (38.7%), ancillary staff (25.8%) | Inappropriate methods of bullying identification, Inadequate statistical analysis plan, and low response rate | High     |
| Chung et al. (2018), USA            | Survey       | Academic                            | Feeling of intimidation, dehumanization, or threat to grade, or career advancement                                                       | Medical students                  | Attending physician (68.4%), resident (26.3%), and nurse (10.5%)  | Inappropriate sample methods, Non-validated method of bullying identification                                 | High     |

|                                     |              |                                     |                                                                                |                                                  |                                                                                                           |                                                                                                                                                                    |          |
|-------------------------------------|--------------|-------------------------------------|--------------------------------------------------------------------------------|--------------------------------------------------|-----------------------------------------------------------------------------------------------------------|--------------------------------------------------------------------------------------------------------------------------------------------------------------------|----------|
| Kemp et al. (2018), USA             | Survey       | Academic hospital                   | Disrespect for the dignity of others that interferes with the learning process | Residents, consultants, and fellows              | Data not provided                                                                                         | Inadequate statistical analysis plan, and low response rate                                                                                                        | Moderate |
| Benmore et al. (2018), England      | Before-after | Academic hospital*                  | Data not provided                                                              | Residents                                        | Senior consultants                                                                                        | Insufficient enrollment, inadequate sample size, no blinding of outcome assessors, high loss to follow-up, lack of statistical analysis or ITS <sup>†</sup> design | High     |
| Duru et al. (2018), Turkey          | Survey       | Academic hospital                   | Data not provided                                                              | Consultants, researchers, administrators, nurses | Specific occupations of bullies not specified                                                             | Inappropriate sampling and inadequate sample size                                                                                                                  | Moderate |
| Chambers et al. (2018), New Zealand | Survey       | Academic and non-academic hospitals | Data not provided                                                              | Specialist Consultants                           | Primarily male. Senior medical staff (52.5%), non-clinical managers (31.8%), and clinical leaders (24.9%) | Low response rate                                                                                                                                                  | Low      |
| House et al. (2018), USA            | Before-after | Academic hospital                   | Data not provided                                                              | Medical Students                                 | Faculty most frequently were the source of bullying followed by residents. Exact                          | Insufficient enrollment, inadequate sample size, no blinding of outcome                                                                                            | High     |

1  
2  
3  
4  
5  
6  
7  
8  
9  
10  
11  
12  
13  
14  
15  
16  
17  
18  
19  
20  
21  
22  
23  
24  
25  
26  
27  
28  
29  
30  
31  
32  
33  
34  
35  
36  
37  
38  
39  
40  
41  
42  
43  
44  
45  
46  
47

|                                     |        |                                     |                                                                                                                                                           |                    |                                                                                        |                                                                                                                                  |          |
|-------------------------------------|--------|-------------------------------------|-----------------------------------------------------------------------------------------------------------------------------------------------------------|--------------------|----------------------------------------------------------------------------------------|----------------------------------------------------------------------------------------------------------------------------------|----------|
|                                     |        |                                     |                                                                                                                                                           |                    | breakdown not specified                                                                | assessors, outcomes not clearly described, lack of statistical analysis, individual-level analysis or ITS design                 |          |
| Kulaylat et al. (2017), USA         | Survey | Academic hospital                   | Verbal abuse, specialty-choice discrimination, non-educational tasks, withholding/denying learning opportunities, neglect and gender/racial insensitivity | Medical Students   | Faculty (57%), residents, fellows (49%), and nurses (33%)                              | Inappropriate sampling, inadequate sample size, classification bias, and non-validated identification or measurement of bullying | High     |
| Bernotaite et al. (2017), Lithuania | Survey | Academic hospitals                  | Data not provided                                                                                                                                         | Family Consultants | Supervisor (25.3%), colleague (9.8%), subordinate (2.9%)                               | Inappropriate sampling, inadequate sample size, and coverage bias                                                                | Moderate |
| Chrysafi et al. (2017), Greece      | Survey | Academic and non-academic hospitals | Data not provided                                                                                                                                         | Consultants        | Surgeons most frequently followed by internal medicine consultants, then radiologists/ | Low response rate and coverage bias                                                                                              | Moderate |

|                                    |        |                                     |                                              |                             |                                                                                                                                                                                              |                                                                       |          |
|------------------------------------|--------|-------------------------------------|----------------------------------------------|-----------------------------|----------------------------------------------------------------------------------------------------------------------------------------------------------------------------------------------|-----------------------------------------------------------------------|----------|
|                                    |        |                                     |                                              |                             | laboratory consultants                                                                                                                                                                       |                                                                       |          |
| Kapoor et al. (2016), India        | Survey | Academic hospital                   | Data not provided                            | Medical students            | Data not provided                                                                                                                                                                            | Inappropriate sampling and inadequate description of study population | Moderate |
| Chadaga et al. (2016), USA         | Survey | Academic hospitals                  | NAQ <sup>‡</sup> used                        | Residents and fellows       | Consultants (29%), nurses (27%), patients (23%), peers (19%)                                                                                                                                 | Low response rate, inadequate sample size, and coverage bias          | Moderate |
| Llewellyn et al. (2016), Australia | Survey | Academic hospitals                  | Data not provided                            | Residents                   | Senior medical staff: (58.3%) in 2015, (60.6%) in 2016. Non-medical staff (33.2%) 2015, (33.9%) 2016, Manager (5.2%) in 2015, (1.2%) in 2016, junior resident (3.3%) in 2015, (4.3%) in 2016 | Low response rate, biased sampling, coverage and classification bias  | High     |
| Rouse et al. (2016), USA           | Survey | Academic clinics                    | NAQ used                                     | Family medicine consultants | Data not provided                                                                                                                                                                            | Low response rate                                                     | Low      |
| Shabazz et al. (2016), UK          | Survey | Academic and non-academic hospitals | Belittle and undermine an individual's work; | Gynecology consultants      | Senior consultants (50.9%), junior consultants                                                                                                                                               | Low response rate, and classification bias                            | Moderate |



1  
2  
3  
4  
5  
6  
7  
8  
9  
10  
11  
12  
13  
14  
15  
16  
17  
18  
19  
20  
21  
22  
23  
24  
25  
26  
27  
28  
29  
30  
31  
32  
33  
34  
35  
36  
37  
38  
39  
40  
41  
42  
43  
44  
45  
46  
47

|                               |        |                    |                                                                                                                                                                                               |                                           |                                                                                                                                                                                                                                                 |                                            |          |
|-------------------------------|--------|--------------------|-----------------------------------------------------------------------------------------------------------------------------------------------------------------------------------------------|-------------------------------------------|-------------------------------------------------------------------------------------------------------------------------------------------------------------------------------------------------------------------------------------------------|--------------------------------------------|----------|
|                               |        |                    | undermining an individual's integrity; persistent and unjustified criticism and monitoring of work; freezing out, ignoring or excluding and continual undervaluing of an individual's effort. |                                           | (22.3%), medical director (4.5%)                                                                                                                                                                                                                |                                            |          |
| Peres et al. (2016), Brazil   | Survey | Academic hospital  | Data not provided                                                                                                                                                                             | Medical students                          | Data not provided                                                                                                                                                                                                                               | Low response rate, and classification bias | Moderate |
| Ling et al. (2016), Australia | Survey | Academic hospitals | NAQ used                                                                                                                                                                                      | General surgery residents and consultants | For trainee victims: staff surgeon (48%), trainee surgeon (13%), admin (13%), nurses (11%), other consultant (6%)<br>For consultant victims; (31%) staff surgeon, (28%) admin, (13%) other consultant, (11%) nurses, other (10%), trainees (4%) | Low response rate                          | Low      |

|                                                  |              |                    |                                                                                            |                                                |                                                                                     |                                                                                                                                          |          |
|--------------------------------------------------|--------------|--------------------|--------------------------------------------------------------------------------------------|------------------------------------------------|-------------------------------------------------------------------------------------|------------------------------------------------------------------------------------------------------------------------------------------|----------|
| Kulaylat et al. (2016), USA                      | Before-after | Academic hospital  | Data not provided                                                                          | Medical Students                               | Faculty (57%), residents/fellows (49%), and nurses (33%)                            | Inadequate sample size, no blinding of outcome assessors                                                                                 | Moderate |
| Ahmadipour et al. (2016), Iran                   | Survey       | Academic hospital  | Being assigned tasks as punishment, being threatened with an unjustly bad score or failure | Medical students, interns and residents        | Data not provided                                                                   | Inadequate sample size                                                                                                                   | Low      |
| Jagsi et al. (2016), USA                         | Survey       | Academic hospital  | Data not provided                                                                          | Consultants who won a career advancement award | Data not provided                                                                   | Inadequate sampling frame and classification bias                                                                                        | Moderate |
| Crebbin et al. (2015), Australia and New Zealand | Survey       | Academic hospitals | Data not provided                                                                          | Residents, fellows and consultants             | Surgical consultants (50%), other medical consultants (24%) and nursing staff (26%) | Low response rate                                                                                                                        | Low      |
| Cresswell et al. (2016), UK                      | Before-after | Academic hospital  | Data not provided                                                                          | Residents                                      | Data not provided                                                                   | Insufficient description of study purpose, inadequate enrollment and sample size, no blinding of outcome assessors, outcomes not clearly | High     |

1  
2  
3  
4  
5  
6  
7  
8  
9  
10  
11  
12  
13  
14  
15  
16  
17  
18  
19  
20  
21  
22  
23  
24  
25  
26  
27  
28  
29  
30  
31  
32  
33  
34  
35  
36  
37  
38  
39  
40  
41  
42  
43  
44  
45  
46  
47

|                                        |        |                      |                                                                                                                                                                        |                             |                                                                                      |                                                                                        |          |
|----------------------------------------|--------|----------------------|------------------------------------------------------------------------------------------------------------------------------------------------------------------------|-----------------------------|--------------------------------------------------------------------------------------|----------------------------------------------------------------------------------------|----------|
|                                        |        |                      |                                                                                                                                                                        |                             |                                                                                      | described, lack of statistical analysis or ITS design and high loss to follow-up       |          |
| Loerbroks et al. (2015), Germany       | Survey | Academic hospitals   | Data not provided                                                                                                                                                      | Residents                   | Data not provided                                                                    | None                                                                                   | Low      |
| Malinauskiene et al. (2014), Lithuania | Survey | Non-academic clinics | NAQ used                                                                                                                                                               | Family medicine consultants | Bullying from patients (11.8%), from colleagues by (8.4%), from superiors by (26.6%) | None                                                                                   | Low      |
| Mavis et al. (2014), USA               | Survey | Academic hospitals   | Mistreatment either intentional or unintentional occurs when behavior shows disrespect for the dignity of others and unreasonably interferes with the learning process | Medical students            | Clinical faculty in the hospital (31%) residents/interns (28%), nurses (11%)         | Low response rate, inadequate description of study population and statistical analysis | Moderate |
| Oser et al. (2014), USA                | Survey | Academic hospital    | Data not provided                                                                                                                                                      | Medical students            | Residents > clerkship faculty > other attendings > other students >                  | None                                                                                   | Low      |

|                            |              |                   |                                                                                                                                               |                  |                                                                                                                           |                                                                                      |      |
|----------------------------|--------------|-------------------|-----------------------------------------------------------------------------------------------------------------------------------------------|------------------|---------------------------------------------------------------------------------------------------------------------------|--------------------------------------------------------------------------------------|------|
|                            |              |                   |                                                                                                                                               |                  | preceptors = nurses                                                                                                       |                                                                                      |      |
| Oku et al. (2014), Nigeria | Survey       | Academic hospital | Data not provided                                                                                                                             | Medical students | Medical students (23.7%), consultants (21.7%), lecturers (17.5%), consultants (16.5%), nurses (16.5%), other staff (4.1%) | None                                                                                 | Low  |
| Gan et al. (2014), Canada  | Survey       | Academic hospital | Data not provided                                                                                                                             | Medical students | Consultants                                                                                                               | Low response rate, inappropriate sampling, small sample size and classification bias | High |
| Fried et al. (2015), USA   | Before-after | Academic hospital | Power mistreatment defined as “made to feel intimidated, dehumanized, or had a threat made about a recommendation, your grade, or your career | Medical students | Residents (49.7%), clinical faculty (36.9%), preclinical faculty (7.9%)                                                   | None                                                                                 | Low  |

1  
2  
3  
4  
5  
6  
7  
8  
9  
10  
11  
12  
13  
14  
15  
16  
17  
18  
19  
20  
21  
22  
23  
24  
25  
26  
27  
28  
29  
30  
31  
32  
33  
34  
35  
36  
37  
38  
39  
40  
41  
42  
43  
44  
45  
46  
47

|                               |        |                    |                                                                                                                                                                                                                                                                                                 |                  |                                                                                                                                         |                                                                                                              |      |
|-------------------------------|--------|--------------------|-------------------------------------------------------------------------------------------------------------------------------------------------------------------------------------------------------------------------------------------------------------------------------------------------|------------------|-----------------------------------------------------------------------------------------------------------------------------------------|--------------------------------------------------------------------------------------------------------------|------|
| Al-Shafae et al. (2013), Oman | Survey | Academic hospitals | Being coerced into carrying out personal services unrelated to the expected role of interns and instances in which interns were excluded from reasonable learning opportunities offered to others, or threatened with failure or poor evaluations for reasons unrelated to academic performance | Residents        | Internal medicine (60.3%), surgery (29%), pediatrics (15.5%), specialists (51.7%), consultants (50%), residents (12.1%), nurses (24.1%) | Inappropriate sampling, inadequate sample size, inadequate description of study population and coverage bias | High |
| Owoaje et al. (2012), Nigeria | Survey | Academic hospital  | Data not provided                                                                                                                                                                                                                                                                               | Medical Students | Consultants (69.1%), residents/fellows (52.4%), other students (15.7%), nurses (7.8%), laboratory technicians (4.1%)                    | Low response rate                                                                                            | Low  |

|                                                                            |                                 |              |                                     |                                                     |                    |                                                                                                  |                                                                                                                                                       |          |
|----------------------------------------------------------------------------|---------------------------------|--------------|-------------------------------------|-----------------------------------------------------|--------------------|--------------------------------------------------------------------------------------------------|-------------------------------------------------------------------------------------------------------------------------------------------------------|----------|
| 1<br>2<br>3<br>4<br>5<br>6<br>7<br>8<br>9<br>10<br>11<br>12                | Askew et al. (2012), Australia  | Survey       | Academic and non-academic hospitals | Data not provided                                   | Consultants        | Consultants (44%), managers (27%), patients (15%), nurses/midwives (4%), junior consultants (1%) | Low response rate                                                                                                                                     | Low      |
| 13<br>14<br>15<br>16<br>17<br>18<br>19<br>20<br>21<br>22<br>23<br>24<br>25 | Meloni et al. (2011), Australia | Before-after | Academic hospital                   | Data not provided                                   | Hospital employees | Data not provided                                                                                | Lack of blinding of outcome assessors, high loss to follow-up, lack of statistical analysis or ITS design, and unit of analysis not clearly described | High     |
| 26<br>27<br>28<br>29                                                       | Dikmetas et al. (2011), Turkey  | Survey       | Academic hospital                   | Data not provided                                   | Residents          | Surgeons > Internists                                                                            | Low response rate                                                                                                                                     | Moderate |
| 30<br>31<br>32<br>33<br>34<br>35<br>36                                     | Eriksen et al. (2011), Norway   | Survey       | Academic hospital                   | NAQ used                                            | Hospital employees | Colleagues. Specific occupations not described                                                   | Low response rate, inappropriate sampling and inadequate statistical analysis                                                                         | Moderate |
| 37<br>38<br>39<br>40<br>41<br>42                                           | Imran et al. (2010), Pakistan   | Survey       | Academic hospitals                  | Threats to professional status, threats to personal | Residents          | Consultants                                                                                      | Inappropriate sampling, classification                                                                                                                | Moderate |

1  
2  
3  
4  
5  
6  
7  
8  
9  
10  
11  
12  
13  
14  
15  
16  
17  
18  
19  
20  
21  
22  
23  
24  
25  
26  
27  
28  
29  
30  
31  
32  
33  
34  
35  
36  
37  
38  
39  
40  
41  
42  
43  
44  
45  
46  
47

|                                       |              |                    |                                                                                                                       |             |                                                                                                                                                        |                                                                                                                                                                |      |
|---------------------------------------|--------------|--------------------|-----------------------------------------------------------------------------------------------------------------------|-------------|--------------------------------------------------------------------------------------------------------------------------------------------------------|----------------------------------------------------------------------------------------------------------------------------------------------------------------|------|
|                                       |              |                    | standing, isolation, overwork, and destabilization                                                                    |             |                                                                                                                                                        | and coverage bias                                                                                                                                              |      |
| Ogunsemi et al. (2010), Nigeria       | Survey       | Academic hospital  | Data not provided                                                                                                     | Residents   | Administrative staff (58%), from the hospital chief executive( 41.4%), from patient relatives (40.4%), nurses (32.7%), residents (30%), patients (20%) | Inadequate sample size                                                                                                                                         | Low  |
| Best et al. (2010), USA               | Before-after | Academic hospital  | Data not provided                                                                                                     | Unspecified | Data not provided                                                                                                                                      | Study purpose not clearly described, insufficient enrollment, no blinding of outcome assessors, lack of statistical or individual-level analysis or ITS design | High |
| Nagata-Kobayashi et al. (2009), Japan | Survey       | Academic hospitals | Assigned you tasks as punishment; threatened to fail you unfairly in residency; competed maliciously or unfairly with | Residents   | Surgery (27.6%), internal medicine (21.4%), emergency medicine (11.5%), anaesthesia                                                                    | Low response rate                                                                                                                                              | Low  |

|                                  |        |                                     |                                                                                                      |             |                                                                                                 |                                                                               |          |
|----------------------------------|--------|-------------------------------------|------------------------------------------------------------------------------------------------------|-------------|-------------------------------------------------------------------------------------------------|-------------------------------------------------------------------------------|----------|
|                                  |        |                                     | you; made negative remarks to you about becoming a consultant or pursuing a career in medicine       |             | (11.3%).<br>Consultants<br>34.1%, patients<br>21.7%, nurses<br>17.2%                            |                                                                               |          |
| Scott et al. (2008), New Zealand | Survey | Academic hospital                   | A threat to professional status and personal standing, isolation, enforced overwork, destabilization | Residents   | Consultants (30%), nurses (30%), patients (25%), radiologists (8%), residents/fellows (7%)      | Low response rate, inadequate sample size and description of study population | Moderate |
| Gadit et al. (2007), Pakistan    | Survey | Academic and non-academic hospitals | Data not provided                                                                                    | Consultants | Senior colleagues                                                                               | Inadequate sample size                                                        | Low      |
| Shrier et al. (2007), USA        | Survey | Academic and non-academic hospitals | Data not provided                                                                                    | Consultants | Colleagues (24%), patients (19%), teachers (18%), supervisors (15%),                            | Inappropriate sampling, inadequate sample size, and coverage bias             | Moderate |
| Cheema et al. (2005), Ireland    | Survey | Academic hospitals                  | Data not provided                                                                                    | Residents   | Senior residents (51-70%), nursing staff 47-59%, administration (15%-16%), colleagues (12%-13%) | Low response rate                                                             | Low      |



1  
2  
3  
4  
5  
6  
7  
8  
9  
10  
11  
12  
13  
14  
15  
16  
17  
18  
19  
20  
21  
22  
23  
24  
25  
26  
27  
28  
29  
30  
31  
32  
33  
34  
35  
36  
37  
38  
39  
40  
41  
42  
43  
44  
45  
46  
47

|                               |        |                      |                   |                  |                                                                                                               |                                                                                                                          |      |
|-------------------------------|--------|----------------------|-------------------|------------------|---------------------------------------------------------------------------------------------------------------|--------------------------------------------------------------------------------------------------------------------------|------|
| Rautio et al. (2005), Finland | Survey | Academic hospital    | Data not provided | Medical students | Lecturers (27.9%), research/senior research fellows (27.7%), professors (16.6%), associate professors (13.6%) | Low response rate, inappropriate sampling, inadequate sample size, and coverage bias                                     | High |
| Wear et al. (2005), USA       | Survey | Academic hospital    | Data not provided | Medical students | General surgeons and obstetricians                                                                            | Low response rate, inappropriate sampling, inadequate sample size, classification and lack of validated measurement tool | High |
| Carr et al. (2000), USA       | Survey | Academic hospitals   | Data not provided | Consultants      | Superiors and colleagues                                                                                      | None                                                                                                                     | Low  |
| Quine (1999), UK              | Survey | Non-academic clinics | Data not provided | Consultants      | 54% greater seniority, 34% same seniority, 12% less senior. 49% of bullies older than victim                  | None                                                                                                                     | Low  |

\*Regarding sexual harassment: the most common sources were attending surgeons (69% overall, 71% female, 18% male); trainee (46% overall, 47% female, 9% male); attending nonsurgical (22%, 22% female, 18% male); other allied health professionals (16%, 15% female, 36% male); nursing (14%, 12% female, 73% male); admin staff (4%, 2% female, 36% male). Re: harassing behaviors: the most common sources were attending orthopaedic surgeon (76% overall, 75% female, 86% male); trainee (30%, 32% female, 14% male); attending physician; nonsurgical (e.g., anesthesiologist, internist) (20%, 21% female, 11% male, nursing staff (18%, 18% female, 20% male); administration staff (13%, 12% female, 17% male); and other allied health professional (9%, 10% female, 9% male)

1  
2  
3 \*\*Academic hospitals/clinics were defined as teaching hospitals/clinics with a university affiliation

4 †Interrupted time series

5 ‡The NAQ is the negative acts questionnaire, a validated tool for assessing the prevalence of workplace bullying

6  
7  
8  
9  
10  
11  
12  
13  
14  
15  
16  
17  
18  
19  
20  
21  
22  
23  
24  
25  
26  
27  
28  
29  
30  
31  
32  
33  
34  
35  
36  
37  
38  
39  
40  
41  
42

For peer review only

**Table 2: Self-reported description of specific bullying behaviours**

| Behaviour                                               | No. of studies/<br>Total studies* | Total cohort<br>No. affected/<br>total participants who<br>completed surveys on<br>behaviours (%)* | Men<br>No. affected/<br>total men who<br>completed surveys on<br>behaviours (%)† | Women<br>No. affected/<br>Total women who<br>completed surveys on<br>behaviours (%)† |
|---------------------------------------------------------|-----------------------------------|----------------------------------------------------------------------------------------------------|----------------------------------------------------------------------------------|--------------------------------------------------------------------------------------|
| <b>Threats to professional status</b>                   |                                   |                                                                                                    |                                                                                  |                                                                                      |
| Persistent unjustified criticism                        | 12/28                             | 4495/16700 (26.9)                                                                                  | 535/1690 (31.7)                                                                  | 552/1402 (39.4)                                                                      |
| Excessive monitoring of work                            | 6/28                              | 1752/6079 (28.8)                                                                                   | 442/1525 (27.7)                                                                  | 441/1298 (34.0)                                                                      |
| Intimidatory use of discipline                          | 15/28                             | 1531/19471 (7.9)                                                                                   | 366/2381 (15.4)                                                                  | 363/2209 (16.4)                                                                      |
| Spread of gossip/rumours                                | 7/28                              | 2977/10060 (29.6)                                                                                  | 88/596 (14.8)                                                                    | 94/453 (20.8)                                                                        |
| False allegations                                       | 6/28                              | 613/3796 (16.1)                                                                                    | 59/596 (9.9)                                                                     | 54/453 (11.9)                                                                        |
| Refusal of leave, training or promotion                 | 9/28                              | 1604/8551 (18.8)                                                                                   | 296/2594 (11.4)                                                                  | 458/2340 (19.6)                                                                      |
| <b>Isolation</b>                                        |                                   |                                                                                                    |                                                                                  |                                                                                      |
| Social/professional exclusion                           | 17/28                             | 6160/21099 (29.1)                                                                                  | 420/2027 (20.7)                                                                  | 1064/2814 (37.8)                                                                     |
| <b>Overwork</b>                                         |                                   |                                                                                                    |                                                                                  |                                                                                      |
| Undue pressure to produce work                          | 7/28                              | 2509/6562 (38.2)                                                                                   | 233/1525 (15.3)                                                                  | 355/1570 (22.6)                                                                      |
| Setting impossible deadlines                            | 6/28                              | 1571/6079 (25.8)                                                                                   | 164/1525 (10.8)                                                                  | 189/1298 (14.6)                                                                      |
| <b>Destabilization</b>                                  |                                   |                                                                                                    |                                                                                  |                                                                                      |
| Shifting goalposts                                      | 1/28                              | 54/417 (12.9)                                                                                      | Not reported                                                                     | Not reported                                                                         |
| Removal of areas of responsibility without consultation | 8/28                              | 1397/6193 (22.6)                                                                                   | 160/1525 (10.5)                                                                  | 171/1298 (13.2)                                                                      |

|    |                          |       |                   |                 |
|----|--------------------------|-------|-------------------|-----------------|
| 1  |                          |       |                   |                 |
| 2  |                          |       |                   |                 |
| 3  | Withholding information  |       |                   |                 |
| 4  | that affects performance | 9/28  | 3836/12503 (30.7) | 219/1553 (14.1) |
| 5  | Ordered to work below    |       |                   |                 |
| 6  | one's competence level   | 10/28 | 2934/8119 (36.1)  | 81/625 (13.0)   |
| 7  |                          |       |                   | 267/1328 (20.1) |
| 8  |                          |       |                   |                 |
| 9  |                          |       |                   |                 |
| 10 |                          |       |                   |                 |
| 11 |                          |       |                   |                 |
| 12 |                          |       |                   |                 |
| 13 |                          |       |                   |                 |
| 14 |                          |       |                   |                 |
| 15 |                          |       |                   |                 |
| 16 |                          |       |                   |                 |
| 17 |                          |       |                   |                 |
| 18 |                          |       |                   |                 |
| 19 |                          |       |                   |                 |
| 20 |                          |       |                   |                 |
| 21 |                          |       |                   |                 |
| 22 |                          |       |                   |                 |
| 23 |                          |       |                   |                 |
| 24 |                          |       |                   |                 |
| 25 |                          |       |                   |                 |
| 26 |                          |       |                   |                 |
| 27 |                          |       |                   |                 |
| 28 |                          |       |                   |                 |
| 29 |                          |       |                   |                 |
| 30 |                          |       |                   |                 |
| 31 |                          |       |                   |                 |
| 32 |                          |       |                   |                 |
| 33 |                          |       |                   |                 |
| 34 |                          |       |                   |                 |
| 35 |                          |       |                   |                 |
| 36 |                          |       |                   |                 |
| 37 |                          |       |                   |                 |
| 38 |                          |       |                   |                 |
| 39 |                          |       |                   |                 |
| 40 |                          |       |                   |                 |
| 41 |                          |       |                   |                 |
| 42 |                          |       |                   |                 |
| 43 |                          |       |                   |                 |
| 44 |                          |       |                   |                 |
| 45 |                          |       |                   |                 |
| 46 |                          |       |                   |                 |
| 47 |                          |       |                   |                 |

\*Total number of studies that described types of bullying behaviours, including studies that did not stratify results by sex. As a result, the denominator for the number of participants in total is not the sum of the denominators for men and women. The denominator was calculated from the total number of individuals who completed surveys on specific bullying behaviours, while the numerator was calculated from the number of individuals who indicated they experienced the specified bullying behaviour. Not all survey studies offered respondents the same options to respond to, and as a result the denominators for each bullying behaviour differ.

†Of the studies that separated data by gender or solely included the results of one gender and included the specified bullying behaviour.

**Table 3. Self-reported impact of academic bullying**

| Effect of academic bullying                                      | No. of studies/<br>Total studies* | Total cohort<br>No. of affected<br>participants/<br>total participants who<br>completed surveys on<br>the impact of bullying<br>(%)* | Men<br>No. of affected men/<br>total men who<br>completed surveys on<br>the impact of bullying<br>(%)† | Women<br>No. of affected women/<br>total women who<br>completed surveys on<br>the impact of bullying<br>(%)† |
|------------------------------------------------------------------|-----------------------------------|--------------------------------------------------------------------------------------------------------------------------------------|--------------------------------------------------------------------------------------------------------|--------------------------------------------------------------------------------------------------------------|
| <b>Psychologic</b>                                               |                                   |                                                                                                                                      |                                                                                                        |                                                                                                              |
| Psychologic distress<br>including<br>depressive/PTSD<br>symptoms | 14/33                             | 5597/14285 (39.1)                                                                                                                    | 1750/5172 (33.8)                                                                                       | 1636/3529 (46.4)                                                                                             |
| Reduced confidence in<br>clinical skill                          | 8/33                              | 564/2112 (26.7)                                                                                                                      | 68/212 (32.1)                                                                                          | 97/597 (16.2)                                                                                                |
| <b>Career</b>                                                    |                                   |                                                                                                                                      |                                                                                                        |                                                                                                              |
| Missed career<br>opportunities                                   | 17/33                             | 2823/9442 (29.9)                                                                                                                     | 357/1898 (18.8)                                                                                        | 1104/2530 (43.6)                                                                                             |
| Considerations of quitting                                       | 7/33                              | 1034/2880 (35.9)                                                                                                                     | Not reported                                                                                           | Not reported                                                                                                 |
| Termination of<br>employment                                     | 5/33                              | 228/4419 (5.2)                                                                                                                       | 4/139 (2.9)                                                                                            | 4/150 (2.7)                                                                                                  |
| Leave of absence                                                 | 2/33                              | 50/748 (6.7)                                                                                                                         | Not reported                                                                                           | Not reported                                                                                                 |
| Self-reported worsening<br>of clinical performance               | 8/33                              | 1673/4841 (34.6)                                                                                                                     | 42/161 (26.1)                                                                                          | 22/101 (21.8)                                                                                                |

\*Total number of studies that described the impact of bullying, including studies that did not stratify results by sex. Not all participants were given the same options to select from.

†Of the studies that separated data by gender or solely included the results of one gender and included the impact of bullying.

**Table 4. Barriers to addressing academic bullying**

| Barrier                                        | No. of studies/Total studies* | No. of participants/total participants (%) |
|------------------------------------------------|-------------------------------|--------------------------------------------|
| <b>Low reporting rates</b>                     |                               |                                            |
| Lack of awareness of what constitutes bullying | 5/35                          | 73/642 (11.4)                              |
| Lack of awareness of reporting process         | 15/35                         | 1115/4215 (26.5)                           |
| Lack of perceived benefit                      | 9/35                          | 667/1621 (41.1)                            |
| Fear that bullying would worsen                | 13/35                         | 969/2696 (35.9)                            |
| Fear of career ramifications                   | 15/35                         | 1094/2664 (41.1)                           |
| Concerns regarding confidentiality             | 4/35                          | 56/445 (12.6)                              |
| <b>Institutional factors</b>                   |                               |                                            |
| Hierarchical nature of medicine                | 7/35                          | Not reported                               |
| Recurring cycle of abuse                       | 3/35                          | Not reported                               |
| Normalization of bullying                      | 10/35                         | Not reported                               |
| Lack of enforcement                            | 13/35                         | 586/1400 (41.9)                            |

\*Total number of studies that described barriers of bullying behaviours

1  
2  
3  
4  
5  
6  
7  
8  
9  
10  
11  
12  
13  
14  
15  
16  
17  
18  
19  
20  
21  
22  
23  
24  
25  
26  
27  
28  
29  
30  
31  
32  
33  
34  
35  
36  
37  
38  
39  
40  
41  
42  
43  
44  
45  
46  
47

For peer review only

1  
2  
3  
4  
5  
6  
7  
8  
9  
10  
11  
12  
13  
14  
15  
16  
17  
18  
19  
20  
21  
22  
23  
24  
25  
26  
27  
28  
29  
30  
31  
32  
33  
34  
35  
36  
37  
38  
39  
40  
41  
42  
43  
44  
45  
46  
47  
48  
49  
50  
51  
52  
53  
54  
55  
56  
57  
58  
59  
60



Figure 1: PRISMA diagram of included studies

We identified 68 articles relevant to academic bullying. We describe the reasons for exclusion at each stage of screening

93x90mm (300 x 300 DPI)





Central illustration: The definition, manifestations, impact, victims, and perpetrators of academic bullying

Academic bullying is defined as an abuse of authority through punishing behaviours that include overwork, destabilization, and isolation. Victims are commonly men, while perpetrators are commonly male consultants. Individual and institutional factors contribute to the ongoing cycle of bullying.

136x88mm (300 x 300 DPI)

**Supplementary table S1: Pooled prevalence of specific bullying behaviours by level of training**

| <b>Behaviour</b>                                        | <b>No. of studies/<br/>Total studies*</b> | <b>Medical Students<br/>No. of participants/<br/>total participants<br/>(%)*</b> | <b>Residents and<br/>fellows<br/>No. of participants/<br/>total participants<br/>(%)*</b> | <b>Consultants<br/>No. of participants/<br/>total participants<br/>(%)*</b> |
|---------------------------------------------------------|-------------------------------------------|----------------------------------------------------------------------------------|-------------------------------------------------------------------------------------------|-----------------------------------------------------------------------------|
| <b>Threats to professional status</b>                   |                                           |                                                                                  |                                                                                           |                                                                             |
| Persistent unjustified criticism                        | 10/24                                     | 200/301 (66.4)                                                                   | 3596/12708 (28.3)                                                                         | 600/2881 (20.8)                                                             |
| Excessive monitoring of work                            | 4/24                                      | Not reported                                                                     | 1020/2445 (41.7)                                                                          | 564/2824 (20.0)                                                             |
| Intimidatory use of discipline                          | 14/24                                     | 641/13914 (4.6)                                                                  | 640/3594 (17.8)                                                                           | 38/1112 (3.4)                                                               |
| Spread of gossip/rumours                                | 5/24                                      | Not reported                                                                     | 2085/6366 (32.8)                                                                          | 755/2881 (26.2)                                                             |
| False allegations                                       | 4/24                                      | Not reported                                                                     | 36/102 (35.3)                                                                             | 509/2881 (17.7)                                                             |
| Refusal of leave, training or promotion                 | 8/24                                      | 74/551 (13.4)                                                                    | 379/3441 (11.0)                                                                           | 894/3403 (26.3)                                                             |
| <b>Isolation</b>                                        |                                           |                                                                                  |                                                                                           |                                                                             |
| Social/professional exclusion                           | 16/24                                     | 418/1546 (27.0)                                                                  | 3687/12385 (29.8)                                                                         | 1272/4445 (28.6)                                                            |
| <b>Overwork</b>                                         |                                           |                                                                                  |                                                                                           |                                                                             |
| Undue pressure to produce work                          | 7/24                                      | Not reported                                                                     | 827/2928 (28.2)                                                                           | 1326/2824 (47.0)                                                            |
| Setting impossible deadlines                            | 6/24                                      | Not reported                                                                     | 351/2445 (14.4)                                                                           | 965/2824 (34.2)                                                             |
| <b>Destabilization</b>                                  |                                           |                                                                                  |                                                                                           |                                                                             |
| Shifting goalposts                                      | 1/24                                      | Not reported                                                                     | 54/654 (8.3)                                                                              | Not reported                                                                |
| Removal of areas of responsibility without consultation | 6/24                                      | 11/56 (19.6)                                                                     | 267/2503 (10.7)                                                                           | 784/2824 (27.8)                                                             |

1  
2  
3  
4  
5  
6  
7  
8  
9  
10  
11  
12  
13  
14  
15  
16  
17  
18  
19  
20  
21  
22  
23  
24  
25  
26  
27  
28  
29  
30  
31  
32  
33  
34  
35  
36  
37  
38  
39  
40  
41  
42  
43  
44  
45  
46  
47

|                                                  |      |                |                  |                  |
|--------------------------------------------------|------|----------------|------------------|------------------|
| Withholding information that affects performance | 7/24 | Not reported   | 2465/8869 (27.8) | 1140/2824 (40.4) |
| Ordered to work below one's competence level     | 7/24 | 182/269 (67.7) | 1276/3676 (34.7) | 975/2881 (33.8)  |

\*Total number of studies that described types of bullying behaviours that separated data by level of training

For peer review only

**Supplementary table S2: The pooled impact of academic bullying by level of training**

| <b>Effect of academic bullying</b>                      | <b>No. of studies/<br/>Total studies*</b> | <b>Medical Students<br/>No. of participants/<br/>total participants<br/>(%) *</b> | <b>Residents and<br/>fellows<br/>No. of participants/<br/>total participants<br/>(%) *</b> | <b>Consultants<br/>No. of participants/<br/>total participants<br/>(%) *</b> |
|---------------------------------------------------------|-------------------------------------------|-----------------------------------------------------------------------------------|--------------------------------------------------------------------------------------------|------------------------------------------------------------------------------|
| <b>Psychiatric</b>                                      |                                           |                                                                                   |                                                                                            |                                                                              |
| Psychiatric distress including depressive/PTSD symptoms | 12/28                                     | 422/579 (72.9)                                                                    | 2142/5256 (40.8)                                                                           | 178/996 (17.9)                                                               |
| Reduced confidence in clinical skill                    | 4/28                                      | 119/262 (45.4)                                                                    | Not reported                                                                               | 177/1259 (14.1)                                                              |
| <b>Career</b>                                           |                                           |                                                                                   |                                                                                            |                                                                              |
| Missed career opportunities                             | 14/28                                     | 484/3020 (16.0)                                                                   | 149/426 (35.0)                                                                             | 1789/5854 (30.6)                                                             |
| Considered quitting                                     | 9/28                                      | 109/317 (34.4)                                                                    | 5/100 (5.0)                                                                                | 908/2375 (38.2)                                                              |
| Terminated employment                                   | 4/28                                      | Not reported                                                                      | 135/3574 (3.8)                                                                             | 11/348 (3.2)                                                                 |
| Leave of absence                                        | 2/28                                      | Not reported                                                                      | Not reported                                                                               | 50/748 (6.7)                                                                 |
| Self-reported worsening of clinical performance         | 6/28                                      | 202/579 (34.9)                                                                    | 1168/3179 (36.7)                                                                           | 51/563 (9.1)                                                                 |

\*Total number of studies that described the impact of academic bullying and separated data by level of training

1  
2  
3  
4  
5  
6  
7  
8  
9  
10  
11  
12  
13  
14  
15  
16  
17  
18  
19  
20  
21  
22  
23  
24  
25  
26  
27  
28  
29  
30  
31  
32  
33  
34  
35  
36  
37  
38  
39  
40  
41  
42  
43  
44  
45  
46  
47

**Supplementary table S3. Suggested policies, interventions and reported outcomes**

| Intervention                               | Outcome                                                                                                                                                                                                                                                                                 |
|--------------------------------------------|-----------------------------------------------------------------------------------------------------------------------------------------------------------------------------------------------------------------------------------------------------------------------------------------|
| <b>Zero-tolerance/Anti-bullying policy</b> |                                                                                                                                                                                                                                                                                         |
| (Cheema et al., 2005)<br>*                 | Data not provided                                                                                                                                                                                                                                                                       |
| (Wear et al., 2005) *                      | Data not provided                                                                                                                                                                                                                                                                       |
| (Gadit et al., 2007) *                     | Data not provided                                                                                                                                                                                                                                                                       |
| (Nagata-Kobayashi et al., 2009) *          | Data not provided                                                                                                                                                                                                                                                                       |
| (Imran et al., 2010) *                     | Data not provided                                                                                                                                                                                                                                                                       |
| (Meloni and Austin, 2011)                  | Increased employee engagement and workplace satisfaction<br>Increased trust among victims that reports would be appropriately managed (44% to 64%)<br>Victims felt safer reporting incidents of bullying (67% to 84%)<br>Improved awareness of where and whom to report to (67% to 84%) |
| (Fried et al., 2012)                       | Reduced power abuse (43% to 30%) but no change in overall mistreatment rates                                                                                                                                                                                                            |
| (Askew et al., 2012) *                     | Data not provided                                                                                                                                                                                                                                                                       |
| (Mavis et al., 2014) *                     | Data not provided                                                                                                                                                                                                                                                                       |
| (Chadaga et al., 2016)<br>*                | Data not provided                                                                                                                                                                                                                                                                       |
| (Kapoor et al., 2016) *                    | Data not provided                                                                                                                                                                                                                                                                       |
| (Peres et al., 2016) *                     | Data not provided                                                                                                                                                                                                                                                                       |
| (Wolfman et al., 2019)<br>*                | Data not provided                                                                                                                                                                                                                                                                       |
| <b>Bullying workshops</b>                  |                                                                                                                                                                                                                                                                                         |
| (Oku et al., 2014) *                       | Data not provided                                                                                                                                                                                                                                                                       |
| (Kulaylat et al., 2016)<br>*               | Data not provided                                                                                                                                                                                                                                                                       |

|    |                                                              |                                                                    |
|----|--------------------------------------------------------------|--------------------------------------------------------------------|
| 1  |                                                              |                                                                    |
| 2  |                                                              |                                                                    |
| 3  | (Cresswell et al.,                                           |                                                                    |
| 4  | 2016) *                                                      | Data not provided                                                  |
| 5  |                                                              |                                                                    |
| 6  | (Benmore et al., 2018)                                       | Increased willingness to try to repair the harm caused by bullying |
| 7  |                                                              | and became more conscious of giving feedback                       |
| 8  | (Castillo-Angeles et                                         |                                                                    |
| 9  | al., 2019)                                                   | Bullying behaviour persisted                                       |
| 10 | (Colenbrander et al.,                                        |                                                                    |
| 11 | 2020) *                                                      | Data not provided                                                  |
| 12 | (Stasenko et al., 2020)                                      |                                                                    |
| 13 | *                                                            | Data not provided                                                  |
| 14 |                                                              |                                                                    |
| 15 | <b>Tracking and reporting mistreatment data</b>              |                                                                    |
| 16 | (Gan and Snell, 2014)                                        | No difference in mistreatment                                      |
| 17 | (Mavis et al., 2014) *                                       | Data not provided                                                  |
| 18 |                                                              |                                                                    |
| 19 | (House et al., 2018)                                         | Decreased unprofessional or disrespectful behaviour by faculty as  |
| 20 |                                                              | reported by students [4.8% (2015-16) to 1.7% (2016-17)]            |
| 21 | (Elghazally et al.,                                          |                                                                    |
| 22 | 2020) *                                                      | Data not provided                                                  |
| 23 | (Hammoud et al.,                                             |                                                                    |
| 24 | 2020) *                                                      | Data not provided                                                  |
| 25 |                                                              |                                                                    |
| 26 | <b>Staff education on bullying and the reporting process</b> |                                                                    |
| 27 | (Cheema et al., 2005)                                        |                                                                    |
| 28 | *                                                            | Data not provided                                                  |
| 29 |                                                              |                                                                    |
| 30 | (Wear et al., 2005) *                                        | Data not provided                                                  |
| 31 | (Gadit et al., 2007) *                                       | Data not provided                                                  |
| 32 | (Scott et al., 2008) *                                       | Data not provided                                                  |
| 33 |                                                              |                                                                    |
| 34 | (Imran et al., 2010) *                                       | Data not provided                                                  |
| 35 | (Fried et al., 2012)                                         | No change in reporting rate                                        |
| 36 | (Al-Shafae, 2013) *                                          | Data not provided                                                  |
| 37 |                                                              |                                                                    |
| 38 | (Mavis et al., 2014) *                                       | Data not provided                                                  |
| 39 | (Oku et al., 2014) *                                         | Data not provided                                                  |
| 40 |                                                              |                                                                    |
| 41 |                                                              |                                                                    |
| 42 |                                                              |                                                                    |
| 43 | 5                                                            |                                                                    |
| 44 |                                                              |                                                                    |
| 45 |                                                              |                                                                    |
| 46 |                                                              |                                                                    |
| 47 |                                                              |                                                                    |

1  
2  
3 (Crebbin et al., 2015)  
4 \* Data not provided  
5 (Chadaga et al., 2016)  
6 \* Data not provided  
7  
8 (Peres et al., 2016) \* Data not provided  
9 (Chung et al., 2018) \* Data not provided  
10 (D’Agostino et al.,  
11 2019) \* Data not provided  
12 (Chowdhury et al.,  
13 2019) \* Data not provided  
14 (Zurayk et al. 2019) \* Data not provided  
15 (Colenbrander et al.,  
16 2020) \* Data not provided  
17 (Elghazally et al.,  
18 2020) \* Data not provided  
19 (Lind et al. 2020) Multiple effect\*\*  
20 (Brown et al., 2020) \* Data not provided  
21  
22 **Develop a committee to handle and support reporting**  
23 (Gadit et al., 2007) \* Data not provided  
24 (Best et al., 2010) Resolutions reached 96% of formal reports  
25 (Kapoor et al., 2016) \* Data not provided  
26 (Kemp et al., 2018) \* Data not provided  
27 (Kappy et al., 2019) Fewer comments on mistreatment  
28 (Ayyala et al., 2019) \* Data not provided  
29 (Brown et al., 2019) \* Data not provided  
30 (Lind et al. 2020) Multiple effects\*\*  
31 (Samora et al., 2020) \* Data not provided  
32 (Hammoud et al.,  
33 2020) \* Data not provided  
34

35 **Accessible and confidential reporting**

|    |                         |                                                           |
|----|-------------------------|-----------------------------------------------------------|
| 1  |                         |                                                           |
| 2  |                         |                                                           |
| 3  | (Imran et al., 2010) *  | Data not provided                                         |
| 4  |                         |                                                           |
| 5  | (Fried et al., 2012)    | Reduced power abuse (43% to 30%) but no change in overall |
| 6  |                         | mistreatment rates                                        |
| 7  | (Askew et al., 2012) *  | Data not provided                                         |
| 8  | (Al-Shafae, 2013) *     | Data not provided                                         |
| 9  |                         |                                                           |
| 10 | (Crebbin et al., 2015)  | Data not provided                                         |
| 11 | *                       |                                                           |
| 12 | (Mavis et al., 2014) *  | Data not provided                                         |
| 13 |                         |                                                           |
| 14 | (Colenbrander et al.,   | Data not provided                                         |
| 15 | 2020) *                 |                                                           |
| 16 | (Brown et al. 2019) *   | Data not provided                                         |
| 17 | (Samora et al., 2020) * | Data not provided                                         |

---

18 \*Suggested approach that had not been implemented

19 \*\* In this study, a substantial decrease in mistreatment (from 62.9% to 40.3%), fear of reporting (from 42.2% to 37.1%), fear of  
20 reprisal (from 28.9% to 22.6%), and an increase in knowledge of reporting increased (from 88.8% to 94.2%) was observed.  
21  
22  
23  
24  
25  
26  
27  
28  
29  
30  
31  
32  
33  
34  
35  
36  
37  
38  
39  
40  
41  
42



**Supplementary figure S1: Search strategy**

1. Exp bullying
2. Exp medicine
3. Exp hospitals
4. (sabotage or mistreat\* or discredit or humiliation or harassment or demean or bully\* or belittle or intimidate or disrespect or coerce or ignore or undermine or exclude or libel or slander or criticism or overwork\*).ti
5. (Workplace or career or professional or academic or promotion\* or employment or job or profession or reputation or academia).mp
6. (medicine or residency\* or "medical school" or "clinical training" or hospital or internship or fellow\* or "junior doctor" or "house officer" or "clinical clerk" or "attending physician" or physician or doctor or clinician or hierarchical system or "clinician-scientist" or learner or faculty or "NHS").ti,ab.
7. Exp aggression
8. 1 or 4 or 7
9. 5 and 8
10. 2 or 3 or 6
11. 9 and 10

1  
2  
3  
4  
5  
6  
7  
8  
9  
10  
11  
12  
13  
14  
15  
16  
17  
18  
19  
20  
21  
22  
23  
24  
25  
26  
27  
28  
29  
30  
31  
32  
33  
34  
35  
36  
37  
38  
39  
40  
41  
42  
43  
44  
45  
46  
47  
48  
49  
50  
51  
52  
53  
54  
55  
56  
57  
58  
59  
60



Supplementary figure S2: The risk of bias of survey studies included in this review

Most studies in this review had at least a moderate risk of bias. Common sources of bias included inappropriate sampling techniques and low sample sizes

88x501mm (300 x 300 DPI)

1  
2  
3  
4  
5  
6  
7  
8  
9  
10  
11  
12  
13  
14  
15  
16  
17  
18  
19  
20  
21  
22  
23  
24  
25  
26  
27  
28  
29  
30  
31  
32  
33  
34  
35  
36  
37  
38  
39  
40  
41  
42  
43  
44  
45  
46  
47  
48  
49  
50  
51  
52  
53  
54  
55  
56  
57  
58  
59  
60



Supplementary figure S3: The risk of bias of before-after studies included in this review

Most studies in this review had at least a moderate risk of bias. Common sources of bias included lack of blinding or a control group and low sample sizes

88x279mm (300 x 300 DPI)



# PRISMA 2009 Checklist

1  
2  
3  
4  
5  
6  
7  
8  
9  
10  
11  
12  
13  
14  
15  
16  
17  
18  
19  
20  
21  
22  
23  
24  
25  
26  
27  
28  
29  
30  
31  
32  
33  
34  
35  
36  
37  
38  
39  
40  
41  
42  
43  
44  
45  
46  
47

| Section/topic                      | #  | Checklist item                                                                                                                                                                                                                                                                                              | Reported on page # |
|------------------------------------|----|-------------------------------------------------------------------------------------------------------------------------------------------------------------------------------------------------------------------------------------------------------------------------------------------------------------|--------------------|
| <b>TITLE</b>                       |    |                                                                                                                                                                                                                                                                                                             |                    |
| Title                              | 1  | Identify the report as a systematic review, meta-analysis, or both.                                                                                                                                                                                                                                         | 1                  |
| <b>ABSTRACT</b>                    |    |                                                                                                                                                                                                                                                                                                             |                    |
| Structured summary                 | 2  | Provide a structured summary including, as applicable: background; objectives; data sources; study eligibility criteria, participants, and interventions; study appraisal and synthesis methods; results; limitations; conclusions and implications of key findings; systematic review registration number. | 3                  |
| <b>INTRODUCTION</b>                |    |                                                                                                                                                                                                                                                                                                             |                    |
| Rationale                          | 3  | Describe the rationale for the review in the context of what is already known.                                                                                                                                                                                                                              | 4                  |
| Objectives                         | 4  | Provide an explicit statement of questions being addressed with reference to participants, interventions, comparisons, outcomes, and study design (PICOS).                                                                                                                                                  | 4                  |
| <b>METHODS</b>                     |    |                                                                                                                                                                                                                                                                                                             |                    |
| Protocol and registration          | 5  | Indicate if a review protocol exists, if and where it can be accessed (e.g., Web address), and, if available, provide registration information including registration number.                                                                                                                               | n/a                |
| Eligibility criteria               | 6  | Specify study characteristics (e.g., PICOS, length of follow-up) and report characteristics (e.g., years considered, language, publication status) used as criteria for eligibility, giving rationale.                                                                                                      | 4,5                |
| Information sources                | 7  | Describe all information sources (e.g., databases with dates of coverage, contact with study authors to identify additional studies) in the search and date last searched.                                                                                                                                  | 4                  |
| Search                             | 8  | Present full electronic search strategy for at least one database, including any limits used, such that it could be repeated.                                                                                                                                                                               | 4                  |
| Study selection                    | 9  | State the process for selecting studies (i.e., screening, eligibility, included in systematic review, and, if applicable, included in the meta-analysis).                                                                                                                                                   | 5                  |
| Data collection process            | 10 | Describe method of data extraction from reports (e.g., piloted forms, independently, in duplicate) and any processes for obtaining and confirming data from investigators.                                                                                                                                  | 5                  |
| Data items                         | 11 | List and define all variables for which data were sought (e.g., PICOS, funding sources) and any assumptions and simplifications made.                                                                                                                                                                       | n/a                |
| Risk of bias in individual studies | 12 | Describe methods used for assessing risk of bias of individual studies (including specification of whether this was done at the study or outcome level), and how this information is to be used in any data synthesis.                                                                                      | 5                  |
| Summary measures                   | 13 | State the principal summary measures (e.g., risk ratio, difference in means).                                                                                                                                                                                                                               | 5                  |
| Synthesis of results               | 14 | Describe the methods of handling data and combining results of studies, if done, including measures of consistency (e.g., $I^2$ ) for each meta-analysis.                                                                                                                                                   | n/a                |



# PRISMA 2009 Checklist

Page 1 of 2

| Section/topic                 | #  | Checklist item                                                                                                                                                                                           | Reported on page # |
|-------------------------------|----|----------------------------------------------------------------------------------------------------------------------------------------------------------------------------------------------------------|--------------------|
| Risk of bias across studies   | 15 | Specify any assessment of risk of bias that may affect the cumulative evidence (e.g., publication bias, selective reporting within studies).                                                             | 5                  |
| Additional analyses           | 16 | Describe methods of additional analyses (e.g., sensitivity or subgroup analyses, meta-regression), if done, indicating which were pre-specified.                                                         | n/a                |
| <b>RESULTS</b>                |    |                                                                                                                                                                                                          |                    |
| Study selection               | 17 | Give numbers of studies screened, assessed for eligibility, and included in the review, with reasons for exclusions at each stage, ideally with a flow diagram.                                          | 5                  |
| Study characteristics         | 18 | For each study, present characteristics for which data were extracted (e.g., study size, PICOS, follow-up period) and provide the citations.                                                             | 5                  |
| Risk of bias within studies   | 19 | Present data on risk of bias of each study and, if available, any outcome level assessment (see item 12).                                                                                                | 9,10               |
| Results of individual studies | 20 | For all outcomes considered (benefits or harms), present, for each study: (a) simple summary data for each intervention group (b) effect estimates and confidence intervals, ideally with a forest plot. | 5                  |
| Synthesis of results          | 21 | Present results of each meta-analysis done, including confidence intervals and measures of consistency.                                                                                                  | 6,7,8,9            |
| Risk of bias across studies   | 22 | Present results of any assessment of risk of bias across studies (see Item 15).                                                                                                                          |                    |
| Additional analysis           | 23 | Give results of additional analyses, if done (e.g., sensitivity or subgroup analyses, meta-regression [see Item 16]).                                                                                    | n/a                |
| <b>DISCUSSION</b>             |    |                                                                                                                                                                                                          |                    |
| Summary of evidence           | 24 | Summarize the main findings including the strength of evidence for each main outcome; consider their relevance to key groups (e.g., healthcare providers, users, and policy makers).                     | 10                 |
| Limitations                   | 25 | Discuss limitations at study and outcome level (e.g., risk of bias), and at review-level (e.g., incomplete retrieval of identified research, reporting bias).                                            | 12                 |
| Conclusions                   | 26 | Provide a general interpretation of the results in the context of other evidence, and implications for future research.                                                                                  | 13                 |
| <b>FUNDING</b>                |    |                                                                                                                                                                                                          |                    |
| Funding                       | 27 | Describe sources of funding for the systematic review and other support (e.g., supply of data); role of funders for the systematic review.                                                               | 13                 |

From: Moher D, Liberati A, Tetzlaff J, Altman DG, The PRISMA Group (2009). Preferred Reporting Items for Systematic Reviews and Meta-Analyses: The PRISMA Statement. PLoS Med 6(7): e1000097. doi:10.1371/journal.pmed1000097

For more information, visit: [www.prisma-statement.org](http://www.prisma-statement.org).

Page 2 of 2

For peer review only - <http://bmjopen.bmj.com/site/about/guidelines.xhtml>

# BMJ Open

## A systematic review of academic bullying in medical settings: dynamics and consequences

|                                 |                                                                                                                                                                                                                                                                                  |
|---------------------------------|----------------------------------------------------------------------------------------------------------------------------------------------------------------------------------------------------------------------------------------------------------------------------------|
| Journal:                        | <i>BMJ Open</i>                                                                                                                                                                                                                                                                  |
| Manuscript ID                   | bmjopen-2020-043256.R3                                                                                                                                                                                                                                                           |
| Article Type:                   | Original research                                                                                                                                                                                                                                                                |
| Date Submitted by the Author:   | 30-Apr-2021                                                                                                                                                                                                                                                                      |
| Complete List of Authors:       | Averbuch, Tauben; McMaster University, Medicine<br>Eliya, Yousif; McMaster University, Health Research Methodology<br>Van Spall, Harriette Gillian Christine; McMaster University, Health Research Methods, Evidence, and Impact; Population Health Research Institute, Medicine |
| <b>Primary Subject Heading</b>: | Medical education and training                                                                                                                                                                                                                                                   |
| Secondary Subject Heading:      | Occupational and environmental medicine                                                                                                                                                                                                                                          |
| Keywords:                       | MEDICAL EDUCATION & TRAINING, GENERAL MEDICINE (see Internal Medicine), HEALTH SERVICES ADMINISTRATION & MANAGEMENT                                                                                                                                                              |
|                                 |                                                                                                                                                                                                                                                                                  |

SCHOLARONE™  
Manuscripts



I, the Submitting Author has the right to grant and does grant on behalf of all authors of the Work (as defined in the below author licence), an exclusive licence and/or a non-exclusive licence for contributions from authors who are: i) UK Crown employees; ii) where BMJ has agreed a CC-BY licence shall apply, and/or iii) in accordance with the terms applicable for US Federal Government officers or employees acting as part of their official duties; on a worldwide, perpetual, irrevocable, royalty-free basis to BMJ Publishing Group Ltd ("BMJ") its licensees and where the relevant Journal is co-owned by BMJ to the co-owners of the Journal, to publish the Work in this journal and any other BMJ products and to exploit all rights, as set out in our [licence](#).

The Submitting Author accepts and understands that any supply made under these terms is made by BMJ to the Submitting Author unless you are acting as an employee on behalf of your employer or a postgraduate student of an affiliated institution which is paying any applicable article publishing charge ("APC") for Open Access articles. Where the Submitting Author wishes to make the Work available on an Open Access basis (and intends to pay the relevant APC), the terms of reuse of such Open Access shall be governed by a Creative Commons licence – details of these licences and which [Creative Commons](#) licence will apply to this Work are set out in our licence referred to above.

Other than as permitted in any relevant BMJ Author's Self Archiving Policies, I confirm this Work has not been accepted for publication elsewhere, is not being considered for publication elsewhere and does not duplicate material already published. I confirm all authors consent to publication of this Work and authorise the granting of this licence.

1  
2  
3 **A systematic review of academic bullying in medical settings: dynamics and consequences**  
4

5 Averbuch T<sup>a</sup>, Yousif E<sup>b</sup>, Van Spall HGC<sup>b, c</sup>  
6

7  
8 **Corresponding author:** Harriette Gillian Christine Van Spall. Harriette.vanspall@phri.ca. 237 Barton Street East, Hamilton, ON L8L  
9  
10 2X2, Canada. Telephone: 905-521-2100 Ext: 40601 Fax: 905-538-8932  
11

12 <sup>a</sup>Department of Medicine, McMaster University, Hamilton, Ontario; <sup>b</sup>Department of Health Research Methods, Evidence, and Impact,  
13  
14 McMaster University, Hamilton, Ontario; <sup>c</sup>Population Health Research Institute, Hamilton, Ontario  
15

16  
17 **Word count: 4327**  
18  
19  
20  
21  
22  
23  
24  
25  
26  
27  
28  
29  
30  
31  
32  
33  
34  
35  
36  
37  
38  
39  
40  
41  
42  
43  
44  
45  
46  
47



## ABSTRACT

**Purpose:** To characterize the dynamics and consequences of bullying in academic medical settings, report factors that promote academic bullying, and describe potential interventions.

**Design:** Systematic review.

**Data sources:** We searched EMBASE and PsycINFO for articles published between January 1, 1999 and February 7, 2021.

**Study selection:** We included studies conducted in academic medical settings in which victims were consultants or trainees. Studies had to describe bullying behaviours; the perpetrators or victims; barriers or facilitators; impact; or interventions. Data were assessed independently by 2 reviewers.

**Results:** We included 68 studies representing 82,349 respondents. Studies described academic bullying as the abuse of authority that impeded the education or career of the victim through punishing behaviours that include overwork, destabilization, and isolation in academic settings. Among 35,779 individuals in 28 studies who responded about bullying patterns, the most commonly described (38.2% respondents) was overwork. Among 24,894 individuals in 33 studies who reported the impact, the most common was psychologic distress (39.1% respondents). Consultants were the most common bullies identified among 15,868 individuals in 31 studies (53.6% respondents). Women represented a majority (56.2%) of victims among 15,246 respondents in 27 studies. Only a minority (28.9%) of 9,410 victims in 25 studies reported the bullying, and most (57.5%) did not perceive a positive outcome. Facilitators of bullying included lack of enforcement of institutional policies (reported in 13 studies), hierarchies (7 studies), and normalization of bullying (10 studies). Studies testing the effectiveness of anti-bullying interventions had a high risk of bias.

1  
2  
3 **Conclusions:** Academic bullying commonly involved overwork, had a negative impact on well-being, and was not typically reported.  
4  
5 Perpetrators were commonly male consultants and victims were commonly women. Methodologically robust trials of anti-bullying  
6  
7 interventions are needed.  
8

9  
10 **Limitations:** Most studies (40/68) had at least a moderate risk of bias. All interventions were tested in uncontrolled before-after  
11  
12 studies.  
13

14 **Keywords:** Medical Education & Training, General Medicine, Health Services Administration & Management  
15  
16

### 17 18 19 **Strengths and limitations** 20

- 21 • This systematic review is comprehensive, including 68 studies with 82,349 consultants and trainees, across several countries  
22 and including all levels of training.  
23
- 24 • We defined inclusion criteria a priori, and used established tools to assess the risk of bias of included studies  
25
- 26 • The included studies varied in their definitions of bullying, sampling bias was noted among the surveys, and intervention  
27  
28  
29  
30  
31 studies were sub-optimally designed  
32  
33  
34  
35  
36  
37  
38  
39  
40  
41  
42

## Background

Bullying behaviours have been described as repeated attempts to discredit, destabilize, or instill fear in an intended target<sup>1</sup>. Bullying can take many forms from overt abuse to subtle acts that erode the confidence, reputation, and progress of the victim<sup>2</sup>. Bullying is common in medicine, likely impacting mental health, professional interactions, and career advancement<sup>3-6</sup>. It may also impact a physician's ability to care for patients<sup>7</sup>. Surveys from the National Health Service (NHS) in the United Kingdom showed that 55% of staff experienced at least one type of bullying; 31% were doctors in training<sup>8</sup>. Bullying is closely related to harassment and discrimination, in which mistreatment is based on personal characteristics or a protected class such as sex or race<sup>9</sup>. Within academic settings, victims may experience all three and the distinction may be less clear. Unlike harassment and discrimination, which have specific legal definitions, bullying is an amorphous term whose victims are often left without legal recourse.

The hierarchical structure of academic medicine – in which there are power imbalances, subjective criteria for recruitment and career advancement, and siloed departments with few checks in place for toxic behaviours – may offer an operational environment in which bullying may be more widespread than in non-academic medical settings. Academic bullying is a seldom-used term within the literature, but is intended to describe the forms of bullying that may exist in academic settings. Academic bullying can be defined as mistreatment in academic institutions with the intention or effect of disrupting the academic or career progress of the victim<sup>10</sup>. The prevalence of academic bullying in medical settings is unknown likely due to a lack of definition of bullying behaviours, a fear of reporting, and insufficient research. There is not much known about the characteristics of perpetrators and victims, and about the

1  
2  
3 impact of bullying on academic productivity, career growth, and patient care. Furthermore, institutional barriers and facilitators of  
4  
5 bullying behavior have not been reported, and the effectiveness of interventions in addressing academic bullying have not been  
6  
7 evaluated.  
8  
9

10  
11  
12 The purpose of this systematic review is to define and classify patterns of academic bullying in medical settings; assess the  
13  
14 characteristics of perpetrators and victims; describe the impact of bullying on victims; review institutional barriers and facilitators of  
15  
16 bullying; and identify possible solutions.  
17  
18  
19  
20

## 21 **Methods**

### 22 **Data sources and searches**

23  
24  
25 This study follows PRISMA reporting guidelines. Two reviewers (T.A, Y.E.) searched two online databases (EMBASE and  
26  
27 PsycINFO) for English-language articles published between January 1, 1999, to February 7, 2021 and relevant to academic bullying in  
28  
29 medicine. An outline of the search is provided in Figure 1. A combination of medical subject heading (MeSH), title, and abstract text  
30  
31 terms encompassing “Medicine”; “Bullying” and “Academia” were used for the full search. The terms of the search are included in  
32  
33 Supplementary figure S1. Two authors (T.A, Y.E.) independently screened articles for inclusion. Differences were resolved by  
34  
35 discussion, and if necessary, by a third author (H.V.).  
36  
37  
38  
39  
40  
41  
42

## Study selection

We included studies conducted in academic medical settings in which victims were either consultants or trainees. We defined academic medical settings as hospitals or clinics that were either university-affiliated or involved trainees. In the case of pre-clinical medical students, academic medical settings included the university where medical instruction took place. Studies were included if they described: the method and impact of bullying; the characteristics of perpetrators and victims; or interventions used to address the bullying. Studies that included trainees or consultants in both academic and non-academic settings were included. We excluded editorials, opinion pieces, reviews, conference abstracts, theses, dissertations, and grey literature.

## Data extraction and quality assessment

Two reviewers (T.A, Y.E.) independently extracted data on: study design, setting (academic or non-academic), definition, description and impact of academic bullying, characteristics of perpetrators and victims, barriers and facilitators of bullying, and interventions and their outcomes. Two reviewers independently assessed studies for risk of bias. We assessed before-after studies using the National Heart, Lung, and Blood Institute quality assessment tool<sup>11</sup> and assessed prevalence surveys using the Joanna Briggs Institute critical appraisal tool<sup>12</sup>. We classified survey studies as low risk of bias if at least 8 of 9 criteria were met, medium risk of bias if 7 of 9 were met, and high risk of bias if less than 7 were met. We classified bias in before-after studies as low if at least 11 of 12 criteria were met, medium if at least 9 of 12 were met, and high if less than 9 were met.

## Data synthesis and analysis

We developed a definition for academic bullying through narrative synthesis of the definitions provided by studies included in this systematic review. We pooled the results of surveys on the basis of similarity of survey themes to facilitate a descriptive analysis. For survey studies on the prevalence or impact of bullying, we solely pooled the results of studies that asked respondents about specific bullying behaviours or impacts, respectively. We then separated results by sex and level of training. Group selection was by consensus between authors. We presented our results as numbers and percentages. We calculated the denominators from the total number of individuals who completed surveys on types of bullying behaviours, the impact of bullying, characteristics of bullies and victims, or barriers to addressing academic bullying. The numerators were calculated from the number of individuals who experienced a specific behaviour or impact, were bullied by a perpetrator at a specified level of training, or endorsed a specific reason for not making a formal report. We also reported the number of studies that described each specific bullying behaviour or impact, demographic characteristics of victims and perpetrators, barriers and facilitators of academic bullying, and specific reasons for not making a formal report. We could not perform a meta-analysis due to the conceptual heterogeneity between studies.

## Patient and public involvement

Patients or the public were not involved in the design, conduct, reporting, or dissemination plans of our research.

## Results

### Screening results

We identified 1342 unique articles, 68 of which met inclusion criteria. Reasons for exclusion are described in Figure 1.

### Characteristics of included studies

Studies were most frequently set in the USA (reported in 31 studies)<sup>3,13-41</sup> and the UK (reported in 5 studies)<sup>8,42-45</sup> and were set in academic hospitals (reported in 54 studies)<sup>1,3-6,13-15,17,19-21,23,24,26,27,29,30,32-35,37-39,41-65</sup> or in both teaching and non-teaching sites (reported in 14 studies)<sup>8,16,25,28,36,40,66-73</sup>. Twenty-five studies included medical students<sup>3-5,13,15,21,22,24,26,33-35,37,39,48,50,52,57-60,63,64,74,75</sup>, 27 included residents or fellows<sup>1,14,16-18,20,22,23,25,27-32,44,45,49-51,55,56,61,62,65,69,72</sup> and 25 included consultants<sup>6,8,16,19,20,25,28,36,38,40-43,46,47,53,66-73,75</sup> (Table 1).

### Definition of academic bullying

Six papers provided definitions for academic bullying<sup>33,48,50,56,58,63</sup>. Common themes included behaviours where the perpetrator abuses authority to punish the victim through isolation, blocked career advancement, and threats to academic standing. We defined academic bullying as the abuse of authority by a perpetrator who targets the victim in an academic setting through punishing behaviours that include overwork, destabilization, and isolation in order to impede the education or career of the target. Multiple

1  
2  
3 studies used the complete or partial Negative Acts Questionnaire (NAQ), a standardized list of bullying behaviours (reported in 24  
4 studies)<sup>1,3,4,6,13–15,24,29,31,36,47–52,54,55,57,60,61,67,73</sup>.

### 10 **Patterns of academic bullying behaviours**

11  
12 There were 35,779 consultant and trainee respondents to surveys of bullying behaviours (reported in 28 studies), but not all  
13 were offered the same options to select from (Table 2). Bullying behaviours were grouped into destabilization (reported in 15 studies),  
14 threats to professional status (reported in 23 studies), overwork (reported in 7 studies), and isolation (reported in 17 studies). Undue  
15 pressure to produce work was commonly reported (38.2% of respondents affected, reported in 7 studies)<sup>14,36,45,47,49,54,67</sup>. Of the 15  
16 studies that described destabilization, common methods included being ordered to work below one's competency level (36.1%,  
17 reported in 10 studies)<sup>31,36,45,47–49,52,67,71,72</sup> and withholding information that affects performance (30.7%; reported in 9  
18 studies)<sup>14,29,31,36,47–49,54,67</sup>. Of the 23 studies that described threats to professional status, common methods were excessive monitoring  
19 (28.8%; reported in 6 studies)<sup>14,36,47,49,54,67</sup> and criticism (26.9%; reported in 12 studies)<sup>14,21,29,36,45,47,49,52,54,67,71,72</sup>. Of the 17 studies that  
20 described isolation, the most common method was social and professional exclusion (29.1%; reported in 17 studies)<sup>4,14,21,24,29,31,36,40,47–  
21 49,52,54,63,67,70,72</sup>.

22  
23  
24  
25  
26  
27  
28  
29  
30  
31  
32  
33  
34  
35  
36  
37  
38 There were 6,179 consultant and trainee respondents to surveys that separated the prevalence of bullying behaviours by sex  
39 (reported in 11 studies). A greater proportion of women experienced all bullying behaviours (reported in 11  
40  
41  
42  
43  
44  
45  
46  
47



1  
2  
3 studies)<sup>14,16,19,22,36,40,48,52,57,63,65</sup> (Table 2). There were 34,175 respondents to surveys that analyzed results by level of training (reported  
4 in 24 studies) (Supplementary table S1). A greater proportion of consultants experienced refusal of applications for leave, training, or  
5 promotion (26.3%, reported in 3 studies)<sup>19,36,47</sup> and removal of areas of responsibility (27.8%, reported in 2 studies)<sup>36,47</sup> than residents  
6 (11.0%, reported in 3 studies; 10.7%, reported in 3 studies, respectively)<sup>14,22,54,55</sup> or medical students (13.4%; 19.6%, reported in 1  
7 study)<sup>22,24</sup>. Compared to medical students (4.6%, reported in 6 studies)<sup>13,15,22,24,52,57</sup> and consultants (3.4%, reported in 2 studies)<sup>36,71</sup>, a  
8 greater proportion of residents experienced the intimidatory use of discipline procedures (17.8%, reported in 6 studies)<sup>14,22,48,54,55,65</sup>. A  
9 greater proportion of medical students experienced persistent criticism (66.4%, reported in 2 studies)<sup>21,52</sup> than residents (28.3%,  
10 reported in 5 studies)<sup>14,29,45,54,72</sup> and consultants (20.8%, reported in 3 studies)<sup>36,47,71</sup>.

### 11 12 13 14 15 16 17 18 19 20 21 22 23 24 **Characteristics of bullies**

25  
26 Thirty-one unique studies representing 15,868 consultants and trainees described the characteristics of bullies, although not all  
27 were offered the same options to select from. Common perpetrators included consultants (53.6%, reported in 30  
28 studies)<sup>1,3,4,6,8,14,15,17,18,20,22,27,28,33,37,40,43,45,47-49,52,54,56,60,62,63,66,72,73</sup>, residents (22.0%, reported in 22  
29 studies)<sup>1,3,6,8,15,17,18,20,22,25,27,28,33,37,45,48,49,54,56,60,62</sup>, and nurses (14.9%, reported in 21 studies)<sup>1,3,4,14,15,17,20,22,25,27,28,33,37,45,48,49,54,56,60,62,73</sup>.

30  
31  
32  
33 Of the 4,277 individuals who identified the gender of their bullies, most reported primarily male (67.2%, reported in 5  
34 studies)<sup>8,36,43,47,72</sup>, followed by primarily female (26.1%, reported in 5 studies)<sup>8,36,43,47,72</sup>, and both (6.7%, reported in 3 studies)<sup>8,43,47</sup>.

35  
36  
37  
38 Among 6,084 medical students, perpetrators were commonly consultants (43.1%, reported in 8 studies)<sup>3,4,15,22,33,37,52,60</sup>, residents

39  
40  
41  
42  
43 10

1  
2  
3 (35.7%, reported in 6 studies)<sup>3,15,22,33,37,60</sup>, nurses (12.4%, reported in 7 studies)<sup>3,4,15,22,33,37,60</sup>, and other medical students (8.8%,  
4 reported in 5 studies)<sup>3,4,22,52,63</sup>. Among 6,289 residents, perpetrators were commonly consultants (52.2%, reported in 12  
5 reported in 5 studies)<sup>3,4,22,52,63</sup>. Among 6,289 residents, perpetrators were commonly consultants (52.2%, reported in 12  
6 studies)<sup>1,14,17,18,22,27,45,48,49,54,56,62</sup>, nurses (24.3%, reported in 11 studies)<sup>1,14,17,22,27,45,48,49,54,56,62</sup>, and other residents (20.6%, reported in  
7 12 studies)<sup>1,14,17,18,22,27,45,48,49,54,56,62</sup>. Of the 1,500 consultants, perpetrators were their peers (39.2%, reported in 7 studies)<sup>6,8,40,47,49,66,73</sup>,  
8 senior consultants (23.7%, reported in 5 studies)<sup>6,8,40,43,73</sup>, and administration (17.7%, reported in 4 studies)<sup>43,47,49,66</sup>.  
9  
10  
11  
12  
13  
14  
15  
16

17 Six unique studies representing 1,698 interns and medical students described the prevalence of academic bullying according to  
18 the specialty rotation of the learner. Academic bullying was common in surgery (32.9% of respondents, reported in 6  
19 studies)<sup>1,13,34,48,56,60,72</sup>, obstetrics and gynecology (25.5%, reported in 2 studies)<sup>13,60</sup> and internal medicine (21.4%, reported in 5  
20 studies)<sup>1,13,48,56,60,72</sup>.  
21  
22  
23  
24  
25  
26  
27

## 28 **Characteristics of victims**

29  
30 Forty-one unique studies described the characteristics of victims, and 29 included the proportion of those who experienced  
31 bullying. Of the 15,704 women and 19,495 men who responded to surveys that analyzed results by sex, women were more likely to  
32 report being bullied than men (54.6% of all women compared to 34.2% of all men, reported in 27 studies)<sup>3,4,14,16,17,19,20,27,28,36,38,41,47–  
33 52,55–57,62,63,65,69,72,75</sup>. There were 10,730 consultant and trainee respondents to surveys that separated the results by demographic  
34 characteristics other than sex, but not all characteristics were captured by each study. A greater proportion of international graduates /  
35  
36  
37  
38  
39  
40  
41  
42

1  
2  
3 non-citizens experienced bullying than citizens (48.0% compared to 43.3%, reported in 4 studies)<sup>14,17,45,72</sup>, and a greater proportion of  
4  
5 overweight participants (BMI > 25) experienced bullying than those with a BMI ≤ 25 (17.8% compared to 11.8%, reported in 1  
6  
7 study)<sup>51</sup>. The relationship between age and bullying varied based on the cut-off used and the survey sample in each study. Among  
8  
9 consultants, a greater proportion of those with full professorship experienced bullying than assistant professors (68.0% compared to  
10  
11 51.9%, reported in 1 study)<sup>41</sup>.

### 12 13 14 15 16 17 **Impact of academic bullying**

18  
19 There were 24,894 consultant and trainee respondents to surveys on the psychological (reported in 20 studies) and career  
20  
21 impact (reported in 25 studies) of academic bullying (Table 3), although not all were offered the same options to select from.  
22  
23 Respondents commonly reported psychiatric distress (39.2%; reported in 14 studies)<sup>6,17,18,27,29,30,43,47,52,56,59,62,71,73</sup>, considerations of  
24  
25 quitting (35.9%; reported in 7 studies)<sup>25,31,43,47,66,70,72</sup>, and reduced clinical ability (34.6%; reported in 8 studies)<sup>25,30,31,45,47,52,56,59</sup>.  
26  
27 Respondents agreed that academic bullying negatively affected patient safety (68.0%; reported in 2 studies)<sup>18,31</sup>. Nine studies  
28  
29 representing 13,418 individuals described the impact of bullying separated by sex (Table 3). A greater proportion of women  
30  
31 experienced loss of career opportunities (43.6%, reported in 8 studies)<sup>16,19,36,38,40,41,52,65</sup> while a greater proportion of men experienced  
32  
33 decreased confidence (32.1%, reported in 2 studies)<sup>41,52</sup> and clinical ability (26.1%, reported in 1)<sup>52</sup>.  
34  
35  
36  
37  
38  
39  
40  
41  
42  
43  
44  
45  
46  
47

1  
2  
3  
4  
5  
6  
7  
8  
9  
10  
11  
12  
13  
14  
15  
16  
17  
18  
19  
20  
21  
22  
23  
24  
25  
26  
27  
28  
29  
30  
31  
32  
33  
34  
35  
36  
37  
38  
39  
40  
41  
42  
43  
44  
45  
46  
47

There were 16,523 consultant and trainee respondents to surveys that separated results by level of training (Supplementary table S2). A greater proportion of medical students experienced psychiatric distress (72.9%; reported in 2 studies)<sup>52,59</sup> than residents (40.8%; reported in 6 studies)<sup>17,18,29,30,56,62</sup> and consultants (17.9%; reported in 4 studies)<sup>43,47,71,73</sup>. A greater proportion of residents endorsed loss of career opportunities (35.0%; reported in 3 studies)<sup>55,65,72</sup> compared to medical students (16.0%; reported in 3 studies)<sup>13,15,52</sup> and consultants (30.6%; reported in 8 studies)<sup>19,36,38,40,41,47,70,71</sup>.

### **Barriers and facilitators of academic bullying**

Thirty-five unique studies pertained to barriers to victims making a formal report (reported in 26 studies) and institutional facilitators (reported in 25 studies) of academic bullying (Table 4). There were 9,239 consultant and trainee respondents to surveys on their actions taken in response to bullying and reasons for not making a formal report, although not all were given the same options to select from. Victims commonly did not formally report the bullying<sup>1,3,4,15,36,43,47,49,50,54,56,60,62,66,72</sup>; only 28.9% of respondents made a formal report. Deterrents to reporting included concern regarding career implications (41.1%; reported in 15 studies)<sup>1,4,15,25,28,35,47,48,50,56,62,65,66,70,72</sup>, not knowing who to report to (26.5%; reported in 15 studies)<sup>1,4,16,22,25,33,47,48,50,56,62,65,66,70,75</sup>, and poor recognition of bullying (11.4%; reported in 5 studies)<sup>5,15,25,33,35,37,42,48,56</sup>. Of the 26 studies, 7 studies representing 1139 individuals reported the outcomes of reporting<sup>1,36,43,47,49,65,72</sup> although only a small range of outcomes were offered among options. Submitting a formal report often had no perceived effect on bullying (35.6%; reported in 5 studies)<sup>36,43,47,49,72</sup> a greater proportion of victims

1  
2  
3 endorsed worsening (21.9%; reported in 3)<sup>36,49,65</sup> than improvement (13.7%; reported in 5 studies)<sup>1,36,43,49,72</sup> in bullying following  
4  
5 reporting.  
6  
7

8  
9  
10 In the 25 unique studies that described institutional facilitators of bullying, common facilitators were lack of enforcement  
11 (reported in 13 studies)<sup>1,16,20,25,28,36,43,47,49,50,54,56,65</sup>, the hierarchical structure of medicine (reported in 7 studies)<sup>26,54,56,57,63,64,71</sup>, and  
12 normalization of bullying (reported in 10 studies)<sup>3,15,19,23,26,31,34,47,62,65</sup>. Individual-level data was not pooled as institutional facilitators  
13  
14 of bullying were most commonly elicited via free-response portions of surveys with varying completion rates.  
15  
16  
17  
18  
19

### 20 21 **Suggested strategies, interventions, and outcomes**

22  
23 Forty-nine unique studies suggested strategies to address academic bullying. These strategies included promoting anti-bullying  
24 policies (reported in 13 studies)<sup>3,14–16,35,45,53,54,56,58,59,66,71</sup>, education to prevent academic bullying (reported in 20  
25  
26 studies)<sup>1,3,4,14,15,20,25,26,31,33,35,45,48,54,59,63–65,71,72</sup>, establishing an anti-bullying oversight committee (reported in 10  
27  
28 studies)<sup>21,22,26,28,30,34,39,58,69,71</sup>, institutional support for victims (reported in 5 studies)<sup>35,46,58,62,72</sup>, and internal reviews where hospitals  
29  
30 develop targeted solutions for their environment (reported in 5 studies)<sup>15,22,24,60,63</sup> (Supplementary table S3).  
31  
32  
33  
34  
35  
36  
37

38 Of the 49 unique studies, 10 implemented organization-level interventions which included workshops with vignettes to  
39  
40 improve recognition of bullying (reported in 4 studies)<sup>23,37,42,44</sup>; a gender and power abuse committee that established reporting  
41  
42

43 14

1  
2  
3 mechanisms and held mandatory workshops on mistreatment (reported in 1)<sup>3</sup>; a gender equity office to handle reporting (reported in  
4 1)<sup>39</sup>; a professionalism-focused approach that included professionalism in employee contracts and performance reviews and a  
5 professionalism office to handle student complaints (reported in 1)<sup>26</sup>; zero-tolerance policies (reported in 1)<sup>53</sup>; and institutional-level  
6 tracking of mistreatment to provide targeted staff education (reported in 2)<sup>21,24</sup>. All 10 studies had an uncontrolled before-after design,  
7 and as such, did not establish causality. In the studies of vignettes, common bullying behaviours were demonstrated to improve  
8 recognition of both subtle and overt acts of bullying. Of the 4 studies that involved bullying recognition workshops, three reported an  
9 associated improvement in bullying recognition<sup>37,42,44</sup>. In a study that developed a gender equity office, reporting was handled through  
10 an intermediary; decisions were binding with consequences for retaliation including termination of employment<sup>39</sup> and 96% of all  
11 formal reports were resolved. In a study where a Gender and Power Abuse committee was formed, there was an associated reduction  
12 in academic abuse<sup>3</sup>. Similarly, in a study that used a multifaceted approach of developing a professionalism committee, and including  
13 professionalism in contracts and performance reviews, there was a 35.9% decrease in reporting of mistreatment, and improved  
14 awareness of the reporting process<sup>26</sup>. In a study where a clerkship committee monitored unprofessionalism, there was an associated  
15 reduction in narrative comments regarding unprofessionalism on end of rotation surveys<sup>21</sup>. In a study assessing the impact of a  
16 professionalism retreat about mistreatment for consultants, there was no reduction in medical student mistreatment<sup>13</sup>. In a study  
17 assessing the implementation of zero-tolerance policies, there was an associated improvement in awareness of bullying reporting  
18 processes<sup>53</sup>.  
19  
20  
21  
22  
23  
24  
25  
26  
27  
28  
29  
30  
31  
32  
33  
34  
35  
36  
37  
38  
39  
40  
41  
42

## Assessment of bias

Twenty-eight studies had a low risk of bias<sup>3,4,8,13,16–19,22,27,29,30,36,41,45,47,49–52,55,56,63,66,71–73,75</sup>, 21 had a moderate risk of bias<sup>1,6,14,15,21,25,28,34,37,38,40,43,46,54,58,59,61,67–70</sup>, and 19 had a high risk of bias<sup>20,23,24,26,31–33,35,37,39,42,44,48,53,57,60,62,64,65</sup>. Among the 58 survey studies, 14 sampled participants inappropriately<sup>5,6,14,19,33,35,40,46,48,54,57,58,60,62,67</sup>, 19 had inadequate sample sizes or did not justify their sample size<sup>1,5,6,14,18,25,31,35,40,46,48,50,55,57,60,64,68,69,71</sup>, 7 did not sufficiently describe the participants<sup>1,15,29,31,35,48,58</sup>, 9 had coverage bias<sup>6,14,40,48,54,57,62,64,65</sup>, 8 did not have an appropriate statistical analysis<sup>15,20,28,34,35,64,67,68</sup>, and 30 had a low response rate<sup>1,5,14–16,20,22,28,31,32,34–36,43,45,47,49,52,56,57,59–62,65–67,69,70,72</sup> (Supplementary figure S2). Among the 10 before-after trials, 1 did not have pre-specified inclusion criteria<sup>44</sup>, 5 had low sample sizes or did not justify their sample size<sup>23,24,37,42,44</sup>, 3 did not have clearly defined, pre-specified, consistently measured outcomes<sup>21,24,44</sup>, 9 did not blind participants<sup>3,23,24,26,37,39,42,44,53</sup>, 5 did not account for loss to follow-up in their analysis<sup>23,26,42,44,53</sup>, and 6 lacked statistical tests to assess for significant pre- to post-intervention changes<sup>24,26,39,42,44,53</sup> (Supplementary figure S3).

## Discussion

In this systematic review, we established a definition for academic bullying, identified common patterns of bullying, and reported the impact on victims. We defined academic bullying as the abuse of authority by a perpetrator who targets the victim in order to impede their education or career through punishing behaviours that include overwork, destabilization, and isolation in an academic setting. Victims reported that academic bullying often resulted in stalled career advancement and thoughts of leaving the

1  
2  
3 position. A majority of academic bullies were senior men, and a majority of victims were women. Barriers to reporting academic  
4  
5 bullying included fear of reprisal, perceived hopelessness, and institutional non-enforcement of anti-bullying policies. Strategies to  
6  
7 overcome academic bullying, such as anti-bullying committees and adding professionalism as a requirement for career advancement,  
8  
9 were associated with an improvement in the prevalence of bullying and resolution of formal reports (Figure 2). Our review differs  
10  
11 from other systematic reviews of bullying in medicine in its scope and population studied. We included studies involving all medical  
12  
13 and surgical disciplines, but limited our analysis to physicians and physician trainees. While prior reviews have focused on the  
14  
15 prevalence of bullying<sup>76</sup> or anti-bullying interventions<sup>77</sup>, our comprehensive review expanded the focus to also include characteristics  
16  
17 of bullies and victims, impact and outcomes of bullying, anti-bullying strategies, and facilitators of academic bullying.  
18  
19  
20  
21  
22  
23

24 Several factors contribute to the prevalence of bullying within academia. The hierarchical structure lends itself to power  
25  
26 imbalances and prevents victims from speaking out, especially when the aggressor is tenured<sup>78</sup>. The relative isolation of departments  
27  
28 within universities allows poor behaviour to go unchecked. Furthermore, the closed networks within departments lend themselves to  
29  
30 mobbing behaviour and causes victims to fear being blacklisted for speaking out<sup>79</sup>.  
31  
32  
33  
34

35 A lack of clarity around the definition can limit awareness and reporting<sup>50</sup>. The Graduation Questionnaire administered to all  
36  
37 American medical students found that in years where respondents were asked if they had been bullied, the estimated prevalence was  
38  
39 lower than when they were asked about specific bullying behaviours<sup>15</sup>. Surveys on bullying should include a list of defining  
40  
41  
42  
43  
44  
45  
46  
47



1  
2  
3 behaviours to increase clarity and accuracy in responses<sup>80</sup>. Even in institutions with established reporting systems, respondents were  
4  
5 often unaware of how to file a report<sup>47</sup>. We found that victims of academic bullying rarely filed reports, primarily due to fear of  
6  
7 retaliation. Reporting was not consistently effective and was more likely to worsen bullying.  
8  
9

10  
11  
12 We found that consultants were the most common perpetrators of bullying at all levels of training, although residents often  
13  
14 bullied medical students. No studies assessed the relative contribution of fellows and senior residents to resident bullying. Among  
15  
16 studies that analyzed bullying among consultants by seniority, senior consultants were a commonly reported source of  
17  
18 bullying<sup>6,8,40,43,73</sup>. Women and ethnic minorities reported higher rates of bullying among demographic groups surveyed, although race  
19  
20 and ethnicity were infrequently assessed in the surveys included in this study. While some argue that the increasing proportion of  
21  
22 women trainees<sup>81,82</sup> may change dynamics in healthcare settings, the leaky academic pipeline in which women remain  
23  
24 underrepresented in several academic specialties and in positions of leadership make them vulnerable to the power asymmetries in  
25  
26 academic medicine<sup>83</sup>.  
27  
28  
29  
30  
31  
32

33 Our review illustrates the self-reported harms of academic bullying. Victims experienced depressive symptoms, self-perceived  
34  
35 loss of clinical ability, and termination of employment. Academic bullying has been linked to depression<sup>51</sup>, substance abuse<sup>84</sup>, and  
36  
37 hospitalization for coronary artery or cerebrovascular disease<sup>85</sup>. Bullying costs the National Health Service (NHS) of the United  
38  
39 Kingdom £325 million annually due to reduced performance and increased staff turnover<sup>86</sup>. Disruptive behavior, linked to bullying in  
40  
41  
42

1  
2  
3 the perioperative setting has been linked to 27% of patient deaths, 67% of adverse events, and 71% of medical errors<sup>7</sup>. Reasons for  
4 consultant error include intimidation leading to a fear of communicating sources of harm and slow response times<sup>87</sup>. We found that  
5 academic bullying negatively impacted patient safety. In a study of emergency medicine residents, 90% reported examples in which  
6 disruptive behaviour affected patient care, and 51% were less likely to call an abusive consultant<sup>18</sup>.  
7  
8  
9  
10  
11  
12  
13  
14

15 Interventions reported as effective were simple and organization-level, such as anti-bullying workshops and committees. Anti-  
16 bullying committees involving staff and learners can research bullying within their institution and address the most common  
17 disruptive behaviours through targeted interventions<sup>67</sup>. An organization-level, rather than individual-level approach may address the  
18 root causes of academic bullying as well as the organizational culture that facilitates ongoing bullying. We found that anti-bullying  
19 committees typically included three elements: (1) a multidisciplinary team that includes clinicians and other front-line staff; (2)  
20 development of anti-bullying policies and a reporting process; and (3) an education campaign to promote awareness of policies.  
21 Owing to their multifaceted nature, it is challenging to evaluate the relative contributions of their components. Without well-designed  
22 trials, the effects of anti-bullying interventions are unknown. All of the intervention studies used before-after designs, which did not  
23 account for confounding variables, co-interventions, and background changes in policy or practice; the majority were at high-risk of  
24 bias. Furthermore, among studies that implemented anti-bullying workshops, the majority interviewed participants immediately after  
25 the workshop without longitudinal follow-up to determine if benefits were sustained.  
26  
27  
28  
29  
30  
31  
32  
33  
34  
35  
36  
37  
38  
39  
40  
41  
42

1  
2  
3 The need for a confidential reporting process was raised in the studies included in this review, but few described how  
4 confidentiality could be maintained when the report has to describe details of the bullying that may be only privy to the perpetrator  
5 and victim. The reporting process could take the form of the Office of Gender Equity at the University of California, where the  
6 accuser and the accused do not meet face to face; the discipline process is through an intermediary<sup>39</sup>. A unique, non-punitive approach  
7 is the restorative justice approach used at Dalhousie University where victims, offenders, and administrators work collaboratively to  
8 address sexual harassment and re-integrate offenders<sup>88</sup>. Reporting may have been ineffective in this review due to the impunity offered  
9 to prominent consultants. Senior personnel, particularly those who are well-known and successful in grant funding, are often  
10 considered “untouchable”, beyond reproach by their institutions<sup>89</sup>. Behaviour is often learned and modeling positive behaviours may  
11 break the cycle of bullying in medicine<sup>90</sup>. One approach would be making professionalism a requirement for promotion and career  
12 advancement, as in the Department of Medicine at the University of Toronto in Canada<sup>91</sup> or the University of Colorado School of  
13 Medicine<sup>26</sup>.

### 30 **Strengths and limitations**

31  
32 The strengths of this review include its broad scope; capturing several aspects of academic bullying, and its size (n = 68  
33 studies, 82,349 consultants and trainees). The cohort included was diverse, comprising several specialties and countries. We explicitly  
34 defined eligibility criteria and extracted data in duplicate. We used established tools to assess the risk of bias.  
35  
36  
37  
38  
39  
40  
41  
42

1  
2  
3 There are several limitations that should be acknowledged. There is no validated definition of academic bullying, and the  
4 included studies varied in their description of bullying. Most studies used questionnaires that were not previously validated. The  
5 survey instruments across studies differed from each other, and their results had to be pooled according to themes to be synthesized.  
6  
7 We could not account for differences in institutional culture and hospital systems in the responses of survey participants. Estimates of  
8 the prevalence of bullying must be interpreted in light of the self-reported nature of bullying surveys. Data on bully/victim  
9 demographics were underrepresented. Selection bias was a significant concern: 14 studies used convenience sampling, and 2 included  
10 voluntary focus groups for victims of bullying to sign up for. Overall, the response rate was 59.2%, with a range of 12% to 100%.  
11  
12 Surrogate outcomes were used such as awareness of bullying, and the reporting of outcomes was inconsistent. As such, the effect of  
13 anti-bullying interventions must be interpreted cautiously.  
14  
15  
16  
17  
18  
19  
20  
21  
22  
23  
24  
25

### 26 **Future directions**

27  
28 Significant gaps exist in the quality of the academic bullying literature, particularly with inconsistent definitions and  
29 limitations in study methodology. Our definition may be used to provide the breadth and granularity required to sufficiently capture  
30 cases of academic bullying in medicine. Studies on the impact of academic bullying would benefit from standardized, validated survey  
31 instruments. Although randomization and blinding are not always possible to test the effect of interventions, a control group should be  
32 included in anti-bullying intervention studies.  
33  
34  
35  
36  
37  
38  
39  
40  
41  
42

## Conclusions:

Academic bullying refers to specific behaviours that disrupt the learning or career of the intended target and commonly consists of exclusion and overwork. The consequences include significant psychiatric distress and loss of career opportunities. Bullies tend to be male senior consultants, whereas victims tend to be females. The fear of reprisal and non-enforcement of anti-bullying policies are the greatest barriers to addressing academic bullying. Results of bullying interventions must be interpreted with caution due to their methodological quality and reliance on surrogate measures. There is a need for well-designed trials with transparent reporting of relevant outcomes and accounting for temporal trends.

## Author contributions

TA contributed to study design, informed the search strategy, extracted and synthesized study data, and drafted and edited the manuscript. YE informed the search strategy, extracted and synthesized study data, and edited the manuscript. HGCV conceived the study idea, informed the search strategy, analyzed the data, drafted and edited the manuscript, and supervised the conduct of the study. HGCV affirms that the manuscript is an honest, accurate, and transparent account of the study being reported; that no important aspects of the study have been omitted; and that any discrepancies from the study as planned have been explained.

## Sources of funding

1  
2  
3 HGCV receives support from the Canadian Institutes of Health Research, the Heart and Stroke Foundation, the Women As  
4  
5 One Escalator Award, and McMaster Department of Medicine.  
6  
7  
8  
9

### 10 **Competing interests**

11 All authors have reported that they have no relationships relevant to the contents of this paper to disclose.  
12  
13  
14  
15  
16

### 17 **Ethical approval**

18 Not required.  
19  
20  
21  
22  
23

### 24 **Data sharing**

25 All data relevant to the study are included in the article.  
26  
27  
28  
29  
30  
31  
32  
33  
34  
35  
36  
37  
38  
39  
40  
41  
42  
43  
44  
45  
46  
47

## References

1. Scott J, Blanshard C, Child S. Workplace bullying of junior doctors: a cross-sectional questionnaire survey. *J New Zeal Med Assoc.* 2008;121(1282):10–4.
2. Lewis D. Workplace bullying. *Body Qual Res.* 2019;42(4):91–106.
3. Fried J, Vermillion M, Parker N, Uijtdehaage S. Eradicating Medical Student Mistreatment: A Longitudinal Study of One Institution's Efforts. *Acad Med.* 2012;87(9):1191–8.
4. Oku AO, Owoaje ET, Oku OO, Monjok E. Mistreatment among undergraduate medical trainees: A case study of a Nigerian medical school. *Niger J Clin Pract.* 2014;17(6):678–82.
5. Kulaylat AN, Qin D, Sun SX, Hollenbeak CS, Schubart JR, Aboud AJ, et al. Perceptions of mistreatment among trainees vary at different stages of clinical training. *BMC Med Educ* [Internet]. 2017;17(1):1–6. Available from: <http://dx.doi.org/10.1186/s12909-016-0853-4>
6. Malinauskiene, V., Bernotaite L., Leisyte P. Bullying Behavior and Mental Health. *Med Pr.* 2017;68(3):307–14.
7. Lavelle-Jones M. Bullying and Undermining Campaign – Let's Remove it [Internet]. The Royal College of Surgeons of Edinburgh. 2017 [cited 2019 Mar 3]. p. 1–2. Available from: <https://www.rcsed.ac.uk/news-public-affairs/news/2017/june/bullying-and-undermining-campaign-let-s-remove-it>
8. Quine L. Workplace bullying in NHS community trust: staff questionnaire survey. *Bmj* [Internet]. 1999;318(7178):228–32. Available from: <http://www.bmj.com/cgi/doi/10.1136/bmj.318.7178.228>

- 1  
2  
3 9. Okechukwu CA, Souza K, Davis KD, de Castro AB. Discrimination, Harassment, Abuse and Bullying in the Workplace:  
4  
5 Contribution of Workplace Injustice to Occupational Health Disparities. *Am J Ind Med.* 2014;57(5):573–86.  
6
- 7  
8 10. McKay R, Arnold DH, Fratzl J, Thomas R. Workplace bullying in academia: A Canadian study. *Empl Responsib Rights J.*  
9  
10 2008;20(2):77–100.  
11
- 12 11. Quality Assessment Tool for Before-After (Pre-Post) Studies With No Control Group [Internet]. National Heart, Lung, and  
13  
14 Blood Institute. Available from: <https://www.nhlbi.nih.gov/health-topics/study-quality-assessment-tools>  
15
- 16  
17 12. Checklist for Prevalence Studies [Internet]. Joanna Briggs Institute. Available from: [http://joannabriggs.org/research/critical-](http://joannabriggs.org/research/critical-appraisal-tools.html)  
18  
19 appraisal-tools.html  
20
- 21  
22 13. Oser TK, Haidet P, Lewis PR, Mauger DT, Gingrich DL, Leong SL. Frequency and negative impact of medical student  
23  
24 mistreatment based on specialty choice: A longitudinal study. *Acad Med.* 2014;89(5):755–61.  
25
- 26  
27 14. Chadaga AR, Villines D, Krikorian A. Bullying in the American Graduate Medical Education System: A National Cross-  
28  
29 Sectional Survey. *PLoS One.* 2016;11(3):e0150246.  
30
- 31  
32 15. Mavis B, Sousa A, Lipscomb W, Rappley MD. Learning about medical student mistreatment from responses to the medical  
33  
34 school graduation questionnaire. *Acad Med.* 2014;89(5):705–11.  
35
- 36  
37 16. Stasenکو M, Tarney C, Seier K, Casablanca Y, Brown CL. Sexual harassment and gender discrimination in gynecologic  
38  
39 oncology. *Gynecol Oncol* [Internet]. 2020;159(2):317–21. Available from: <https://doi.org/10.1016/j.ygyno.2020.08.014>  
40
- 41  
42 17. Kemper KJ, Schwartz A. Bullying, Discrimination, Sexual Harassment, and Physical Violence: Common and Associated With  
43  
44

25



- 1  
2  
3 Burnout in Pediatric Residents. *Acad Pediatr* [Internet]. 2020;20(7):991–7. Available from:  
4  
5 <https://doi.org/10.1016/j.acap.2020.02.023>  
6  
7
- 8 18. Huber M, Lopez J, Messman A, Xu TK, McLaughlin T, Richman P. Emergency Medicine Resident Perception of Abuse by  
9  
10 Consultants: Results of a National Survey. *Ann Emerg Med*. 2020;76(6):814–5.  
11
- 12 19. Raj A, Freund KM, McDonald JM, Carr PL. Effects of sexual harassment on advancement of women in academic medicine: A  
13  
14 multi-institutional longitudinal study. *EClinicalMedicine* [Internet]. 2020;20:100298. Available from:  
15  
16 <https://doi.org/10.1016/j.eclinm.2020.100298>  
17  
18
- 19 20. D’Agostino JP, Vakharia KT, Bawa S, Sljivic S, Natoli N. Intimidation and Sexual Harassment during Plastic Surgery Training  
20  
21 in the United States. *Plast Reconstr Surg - Glob Open*. 2019;7(12):e2493.  
22
- 23 21. Kappy MD, Holman E, Kempner S, Santen SA, Skinner B, Hammoud M. Identifying Medical Student Mistreatment in the  
24  
25 Obstetrics and Gynecology Clerkship. *J Surg Educ* [Internet]. 2019;76(6):1516–25. Available from:  
26  
27 <https://doi.org/10.1016/j.jsurg.2019.04.010>  
28  
29
- 30 22. Hammoud MM, Appelbaum NP, Wallach PM, Burrows HL, Kochhar K, Hemphill RR, et al. Incidence of resident mistreatment  
31  
32 in the learning environment across three institutions. *Med Teach* [Internet]. 2020;0(0):1–7. Available from:  
33  
34 <https://doi.org/10.1080/0142159X.2020.1845306>  
35  
36
- 37 23. Castillo-Angeles M, Calvillo-Ortiz R, Acosta D, Watkins AA, Evenson A, Atkins KM, et al. Mistreatment and the Learning  
38  
39 Environment: A Mixed Methods Approach to Assess Knowledge and Raise Awareness Amongst Residents. *J Surg Educ*  
40  
41  
42

- [Internet]. 2019;76(2):305–14. Available from: <https://doi.org/10.1016/j.jsurg.2018.07.019>
24. House J, Griffith M, Kappy M, Holman E, Santen S. Tracking Student Mistreatment Data to Improve the Emergency Medicine Clerkship Learning Environment. *West J Emerg Med* [Internet]. 2018;19(January):18–22. Available from: <https://escholarship.org/uc/item/9md5263b>
25. Zurayk LF, Cheng KL, Zemplenyi M, Burke A, Dillon JK. Perceptions of Sexual Harassment in Oral and Maxillofacial Surgery Training and Practice. *J Oral Maxillofac Surg* [Internet]. 2019;77(12):2377–85. Available from: <https://doi.org/10.1016/j.joms.2019.08.019>
26. Lind KT, Osborne CM, Badesch B, Blood A, Lowenstein SR. Ending student mistreatment: early successes and continuing challenges. *Med Educ Online* [Internet]. 2020;25(1). Available from: <https://doi.org/10.1080/10872981.2019.1690846>
27. Hu Y-Y, Ellis RJ, Hewitt DB, Yang AD, Cheung EO, Moskowitz JT, et al. Discrimination, Abuse, Harassment, and Burnout in Surgical Residency Training. *N Engl J Med*. 2019;381(18):1741–52.
28. Balch Samora J, Van Heest A, Weber K, Ross W, Huff T, Carter C. Harassment, Discrimination, and Bullying in Orthopaedics: A Work Environment and Culture Survey. *J Am Acad Orthop Surg*. 2020;28(24):e1097–104.
29. Zhang LM, Ellis RJ, Ma M. Prevalence, Types, and Sources of Bullying Reported by US General Surgery Residents in 2019. *JAMA*. 2020;323(20):2093–5.
30. Ayyala MS, Rios R, Wright SM. Perceived Bullying Among Internal Medicine Residents. *JAMA - J Am Med Assoc*. 2019;322(6):576–8.

- 1  
2  
3 31. Chowdhury ML, Husainat MM, Suson KD. Workplace Bullying of Urology Residents: Implications for the Patient and  
4 Provider. *Urology* [Internet]. 2019;127:30–5. Available from: <https://doi.org/10.1016/j.urology.2018.11.062>  
5  
6  
7  
8 32. Wolfman DJ, Parikh JR. Resident bullying in diagnostic radiology. *Clin Imaging* [Internet]. 2019;55(September 2018):47–52.  
9 Available from: <https://doi.org/10.1016/j.clinimag.2019.01.024>  
10  
11  
12 33. Chung MP, Thang CK, Vermillion M, Fried JM, Uijtdehaage S. Exploring medical students' barriers to reporting mistreatment  
13 during clerkships: a qualitative study. *Med Educ Online* [Internet]. 2018;23(1). Available from:  
14 <https://doi.org/10.1080/10872981.2018.1478170>  
15  
16  
17  
18 34. Kemp MT, Smith M, Kizy S, Englesbe M, Reddy RM. Reported Mistreatment During the Surgery Clerkship Varies by Student  
19 Career Choice. *J Surg Educ* [Internet]. 2018;75(4):918–23. Available from: <http://dx.doi.org/10.1016/j.jsurg.2017.10.011>  
20  
21  
22  
23 35. Wear D, Aultman J. Sexual Harassment in Academic Medicine: Persistence, Non-Reporting, and Institutional Response. *Med*  
24 *Educ Online* [Internet]. 2005;10:1–11. Available from: <http://med-ed-online.net/index.php/meo/article/view/4377>  
25  
26  
27  
28 36. Rouse LP, Gallagher-Garza S, Gebhard RE, Harrison SL, Wallace LS. Workplace Bullying Among Family Physicians: A  
29 Gender Focused Study. *J Women's Heal* [Internet]. 2016;25(9):882–8. Available from:  
30 <http://online.liebertpub.com/doi/10.1089/jwh.2015.5577>  
31  
32  
33  
34 37. Kulaylat AN, Qin D, Sun SX, Hollenbeak CS, Schubart JR, Aboud AJ, et al. Aligning perceptions of mistreatment among  
35 incoming medical trainees. *J Surg Res* [Internet]. 2017;208:151–7. Available from: <http://dx.doi.org/10.1016/j.jss.2016.09.016>  
36  
37  
38  
39 38. Jagsi R, Griffith KA, Jones R, Perumalswami CR, Ubel P, Stewart A. Sexual harassment and discrimination experiences of  
40  
41  
42  
43 28

- 1  
2  
3 academic medical faculty. JAMA - J Am Med Assoc. 2016;315(19):2120–1.  
4  
5  
6 39. Best CL, Smith DW, Raymond JR, Greenberg RS, Crouch RK. Preventing and responding to complaints of sexual harassment  
7  
8 in an academic health center: A 10-year review from the medical university of South Carolina. Acad Med [Internet].  
9  
10 2010;85(4):721–7. Available from: [https://www.scopus.com/inward/record.uri?eid=2-s2.0-](https://www.scopus.com/inward/record.uri?eid=2-s2.0-77951689419&partnerID=40&md5=97e206986f1b9d460bd010dad33d83f3)  
11  
12 [77951689419&partnerID=40&md5=97e206986f1b9d460bd010dad33d83f3](https://www.scopus.com/inward/record.uri?eid=2-s2.0-77951689419&partnerID=40&md5=97e206986f1b9d460bd010dad33d83f3)  
13  
14  
15 40. Shrier DK, Zucker AN, Mercurio AE, Landry LJ, Rich M, Shrier LA. Generation to Generation: Discrimination and  
16  
17 Harassment Experiences of Physician Mothers and Their Physician Daughters. J Women’s Heal [Internet]. 2007;16(6):883–94.  
18  
19 Available from: <http://www.liebertonline.com/doi/abs/10.1089/jwh.2006.0127>  
20  
21  
22 41. Carr PL, Ash AS, Friedman RH, Szalacha L, Barnett RC, Palepu A, et al. Faculty Perceptions of Gender Discrimination and  
23  
24 Sexual Harassment in Academic Medicine. Ann Intern Med. 2000;132(11):889–96.  
25  
26  
27 42. Benmore G, Henderson S, Mountfield J, Wink B. The Stopit! programme to reduce bullying and undermining behaviour in  
28  
29 hospitals: Contexts, mechanisms and outcomes. J Health Organ Manag. 2018;32(3):428–43.  
30  
31  
32 43. Shabazz T, Parry-Smith W, Oates S, Henderson S, Mountfield J. Consultants as victims of bullying and undermining: A survey  
33  
34 of Royal College of Obstetricians and Gynaecologists consultant experiences. BMJ Open. 2016;6(6).  
35  
36  
37 44. Cresswell K, Sivashanmugarajan V, Lodhi W, Yoong W. Bullying workshops for obstetric trainees: A way forward. Clin  
38  
39 Teach. 2015;12(2):83–7.  
40  
41  
42 45. Cheema S, Ahmad K, Naqvi SA. Bullying of Junior Doctors Prevails in Irish Health System: A Bitter Reality. Ir Med J.  
43  
44  
45  
46  
47

- 1  
2  
3 2005;98(9):12–4.  
4  
5  
6 46. Duru P, Ocaktan ME, Çelen Ü, Örsal Ö. The Effect of Workplace Bullying Perception on Psychological Symptoms: A  
7  
8 Structural Equation Approach. *Saf Health Work*. 2018;9(2):210–5.  
9  
10 47. Chambers CNL, Frampton CMA, McKee M, Barclay M. It feels like being trapped in an abusive relationship’: Bullying  
11  
12 prevalence and consequences in the New Zealand senior medical workforce: A cross-sectional study. *BMJ Open*. 2018;8(3).  
13  
14 48. Al-Shafae M, Al-Kaabi Y, Al-Farsi Y, White G, Al-Maniri A, Al-Sinawi H, et al. Pilot study on the prevalence of abuse and  
15  
16 mistreatment during clinical internship: A cross-sectional study among first year residents in Oman. *BMJ Open*. 2013;3(2):1–7.  
17  
18 49. Ling M, Young CJ, Shepherd HL, Mak C, Saw RPM. Workplace Bullying in Surgery. *World J Surg*. 2016;40(11):2560–6.  
19  
20 50. Ahmadipour H, Vafadar R. Why mistreatment of medical students is not reported in clinical settings: perspectives of trainees.  
21  
22 *Indian J Med Ethics* [Internet]. 2016;I(4):215–8. Available from: [http://ijme.in/articles/why-mistreatment-of-medical-students-](http://ijme.in/articles/why-mistreatment-of-medical-students-is-not-reported-in-clinical-settings-perspectives-of-trainees/?galley=html)  
23  
24 [is-not-reported-in-clinical-settings-perspectives-of-trainees/?galley=html](http://ijme.in/articles/why-mistreatment-of-medical-students-is-not-reported-in-clinical-settings-perspectives-of-trainees/?galley=html)  
25  
26  
27  
28 51. Loerbroks A, Weigl M, Li J, Glaser J, Degen C, Angerer P. Workplace bullying and depressive symptoms: A prospective study  
29  
30 among junior physicians in Germany. *J Psychosom Res* [Internet]. 2015;78(2):168–72. Available from:  
31  
32 <http://dx.doi.org/10.1016/j.jpsychores.2014.10.008>  
33  
34  
35 52. Owoaje ET, Uchendu OC, Ige OK. Experiences of mistreatment among medical students in a university in south west Nigeria.  
36  
37 *Niger J Clin Pract*. 2012;15(2):214–9.  
38  
39 53. Meloni M, Austin M. Implementation and outcomes of a zero tolerance of bullying and harassment program. *Aust Heal Rev*.  
40  
41  
42  
43 30

- 2011;35(1):92–4.
54. Imran N, Jawaid M, Haider II, Masood Z. Bullying of junior doctors in Pakistan : A cross- sectional survey. *Singapore Med J* [Internet]. 2010;51(7):592–5. Available from: <https://www.ncbi.nlm.nih.gov/pubmed/20730401>
55. Ogunsemi OO, Alebiosu OC, Shorunmu OT. A survey of perceived stress, intimidation, harassment and well-being of resident doctors in a nigerian teaching hospital. *Niger J Clin Pract*. 2010;13(2):183–6.
56. Nagata-Kobayashi S, Maeno T, Yoshizu M, Shimbo T. Universal problems during residency: Abuse and harassment. *Med Educ*. 2009;43(7):628–36.
57. Rautio A, Sunnari V, Nuutinen M, Laitala M. Mistreatment of university students most common during medical studies. *BMC Med Educ*. 2005;5:1–12.
58. Kapoor S, Ajinkya S, Jadhav PR. Bullying and victimization trends in undergraduate medical students ??? A self-reported cross-sectional observational survey. *J Clin Diagnostic Res*. 2016;10(2):VC05–8.
59. Peres MF, Babler F, Arakaki JN, Quaresma IY, Barreto AD, Silva AT E-NJ. Mistreatment in an academic setting and medical students’ perceptions about their course in São Paulo, Brazil: a cross-sectional study. *Sao Paulo Med J*. 2016;134(2):130–7.
60. Gan R, Snell L. When the learning environment is suboptimal: Exploring medical students’ perceptions of “mistreatment.” *Acad Med*. 2014;89(4):608–17.
61. Dikmetaş E, Top M, Ergin G. An examination of mobbing and burnout of residents. *Turk Psikiyat Derg*. 2011;22(3):137–49.
62. Llewellyn A, Karageorge A, Nash L, Li W, Neuen D. Bullying and sexual harassment of junior doctors in New South Wales,

- 1  
2  
3 Australia: Rate and reporting outcomes. *Aust Heal Rev*. 2018;(September 2017).  
4  
5  
6 63. Elghazally NM, Atallah AO. Bullying among undergraduate medical students at Tanta University, Egypt: a cross-sectional  
7  
8 study. *Libyan J Med [Internet]*. 2020;15(1). Available from: <https://doi.org/10.1080/19932820.2020.1816045>  
9  
10 64. Colenbrander L, Causer L, Haire B. “If you can’t make it, you’re not tough enough to do medicine”: A qualitative study of  
11  
12 Sydney-based medical students’ experiences of bullying and harassment in clinical settings. *BMC Med Educ*. 2020;20(1):1–12.  
13  
14 65. Brown A, Bonneville G, Glaze S. Nevertheless, They Persisted: How Women Experience Gender-Based Discrimination During  
15  
16 Postgraduate Surgical Training. *J Surg Educ [Internet]*. 2021;78(1):17–34. Available from:  
17  
18 <https://doi.org/10.1016/j.jsurg.2020.06.027>  
19  
20 66. Askew DA, Schluter PJ, Dick ML, ??go PM, Turner C, Wilkinson D. Bullying in the Australian medical workforce: Cross-  
21  
22 sectional data from an Australian e-Cohort study. *Aust Heal Rev*. 2012;36(2):197–204.  
23  
24 67. Eriksen GS, Nygreen I, Webster RF. Bullying Among Hospital Staff: Use of Psychometric Triage to Identify Intervention  
25  
26 Priorities. *Psychom Triage Bullying Electron J Appl Psychol*. 2011;7(2):26–31.  
27  
28 68. Iqbal A, Khattak A, Malik FR. Bullying Behaviour In Operating Theatres. *J Ayub Med Coll Abbottabad*. 2020;32(3):352–5.  
29  
30 69. Brown J, Drury L, Raub K, Levy B, Brantner P, Krivak TC, et al. Workplace Harassment and Discrimination in Gynecology:  
31  
32 Results of the AAGL Member Survey. *J Minim Invasive Gynecol [Internet]*. 2019;26(5):838–46. Available from:  
33  
34 <https://doi.org/10.1016/j.jmig.2019.03.004>  
35  
36 70. Chrysafi P, Simou E, Makris M, Malietzis G, Makris GC. Bullying and Sexual Discrimination in the Greek Health Care  
37  
38  
39  
40  
41  
42  
43 32  
44  
45  
46  
47

- System. *J Surg Educ.* 2017;74(4):690–7.
71. Gadit AAM, Mugford G. A pilot study of bullying and harassment among medical professionals in Pakistan, focussing on psychiatry: Need for a medical ombudsman. *J Med Ethics.* 2008;34(6):463–6.
72. Crebbin W, Campbell G, Hillis DA, Watters DA. Prevalence of bullying, discrimination and sexual harassment in surgery in Australasia. *ANZ J Surg.* 2015;85(12):905–9.
73. Malinauskiene V, Bernotaite L. Workplace bullying and posttraumatic stress symptoms among family physicians in Lithuania. *Occup Environ Med [Internet].* 2014;71(6):A113. Available from: <http://shibboleth.ovid.com/secure/?T=JS&CSC=Y&NEWS=N&PAGE=fulltext&D=emed12&AN=71745305%5Cnhttp://sfx.kcl.ac.uk/kings?sid=OVID:embase&id=pmid:&id=doi:10.1136/oemed-2014-102362.356&genre=article&atitle=Workplace+bullying+and+posttraumatic+stress+symptoms+a>
74. Aaronson KD, Cowger J. Heart failure prognostic models why bother? *Circ Hear Fail.* 2012;5(1):6–9.
75. Afkhamzadeh A, Mohamadi Bolbanabad A, Moloudi B, Safari H, Piroozi B. Workplace violence against physicians and medical students in west part of Iran. *Int J Hum Rights Healthc.* 2019;12(2):116–23.
76. Fnais N, Soobiah C, Chen MH, Lillie E, Perrier L, Tashkhandi M, et al. Harassment and discrimination in medical training: A systematic review and meta-analysis. *Acad Med.* 2014;89(5):817–27.
77. Gamble Blakey A, Smith-Han K, Anderson L, Collins E, Berryman E, Wilkinson TJ. Interventions addressing student bullying in the clinical workplace: A narrative review. *BMC Med Educ.* 2019;19(1):1–13.



- 1  
2  
3 78. Sharma M. Workplace Bullying: An exploratory study in Australian academia. *Grants Regist* 2020. 2019;315–6.  
4  
5 79. Khoo SB. Academic mobbing: Hidden health hazard at workplace. *Malaysian Fam Physician*. 2010;5(2):61–7.  
6  
7 80. GMC. National training survey 2014. *Gen Med Counc*. 2014;  
8  
9 81. Association of American Medical Colleges (AAMC). *The Majority of U.S. Medical Students Are Women*. 2019.  
10  
11 82. Jefferson L, Bloor K, Maynard A. Women in medicine: Historical perspectives and recent trends. *Br Med Bull*. 2015;  
12  
13 83. Girod S, Fassiotto M, Grewal D, Ku MC, Sriram N, Nosek BA, et al. Reducing implicit gender leadership bias in academic  
14  
15 medicine with an educational intervention. *Acad Med*. 2016;91(8):1143–50.  
16  
17 84. Niedhammer I, David S, Degioanni S, Drummond A, Philip P. Workplace bullying and psychotropic drug use: The mediating  
18  
19 role of physical and mental health status. *Ann Occup Hyg*. 2011;55(2):152–63.  
20  
21 85. Xu T, Magnusson Hanson LL, Lange T, Starkopf L, Westerlund H, Madsen IEH, et al. Workplace bullying and workplace  
22  
23 violence as risk factors for cardiovascular disease: a multi-cohort study. *Eur Heart J*. 2018;0(1):1–12.  
24  
25 86. Mistry M, Latoo J. Bullying : a growing workplace menace. *Br J Med Pract*. 2009;2(1):23–6.  
26  
27 87. Rosenstein AH. Physician disruptive behaviors: Five year progress report. *World J Clin Cases* [Internet]. 2015;3(11):930.  
28  
29 Available from: <http://www.wjgnet.com/2307-8960/full/v3/i11/930.htm>  
30  
31 88. Acosta D, Karp DR. Restorative Justice as the Rx for Mistreatment in Academic Medicine: Applications to Consider for  
32  
33 Learners, Faculty, and Staff. *Acad Med*. 2018;354–6.  
34  
35 89. Watters DAK, Hillis DJ. Discrimination, bullying and sexual harassment: Where next for medical leadership? *Med J Aust*.  
36  
37  
38  
39  
40  
41  
42  
43  
44  
45  
46  
47

1  
2  
3 2015;203(4):175-175e.1.  
4

- 5  
6 90. Lehmann LS, Sulmasy LS, Desai S, Ethics ACP. Annals of Internal Medicine Hidden Curricula , Ethics , and Professionalism :  
7  
8 Optimizing Clinical Learning Environments in Becoming and Being a Physician : A Position Paper of the American College of  
9  
10 Physicians. Ann Intern Med. 2018;168(7):506–8.  
11  
12 91. Singer H. Addressing unprofessional behaviour among physicians [Internet]. St. Michael’s Hospital. 2018 [cited 2019 Mar 2].  
13  
14 Available from: [http://stmichaelshospital.com/media/detail.php?source=hospital\\_news/2018/0730](http://stmichaelshospital.com/media/detail.php?source=hospital_news/2018/0730)  
15  
16  
17  
18  
19  
20  
21  
22  
23  
24  
25  
26  
27  
28  
29  
30  
31  
32  
33  
34  
35  
36  
37  
38  
39  
40  
41  
42

1  
2  
3  
4  
5  
6  
7  
8  
9  
10  
11  
12  
13  
14  
15  
16  
17  
18  
19  
20  
21  
22  
23  
24  
25  
26  
27  
28  
29  
30  
31  
32  
33  
34  
35  
36  
37  
38  
39  
40  
41  
42  
43  
44  
45  
46  
47

**Table 1. Summary of studies investigating bullying in academic medicine**

| Author (year), Country     | Study design | Setting                             | Definition of academic bullying                        | Target                              | Perpetrator                                                                                                                                                                                                                                                                             | Source of bias                          | Risk of Bias |
|----------------------------|--------------|-------------------------------------|--------------------------------------------------------|-------------------------------------|-----------------------------------------------------------------------------------------------------------------------------------------------------------------------------------------------------------------------------------------------------------------------------------------|-----------------------------------------|--------------|
| Huber et al. (2020), USA   | Survey       | Academic and non-academic hospitals | Data not provided                                      | Residents                           | Consultant (83%) and resident (63%)                                                                                                                                                                                                                                                     | Inadequate sample size                  | Low          |
| Hammoud et al. (2020), USA | Survey       | Academic hospitals                  | Study based graduation questionnaire                   | Residents and medical students      | For resident victims: consultant (58.7%), resident (27.9%), nurses (26.4%), other employees (10.2%), and administration (5.4%). For medical student victims: consultant (66.4%), resident (50.9%), nurses (22.4%), other employees (13.8%), administration (5.2%), and students (12.0%) | Low response rate                       | Low          |
| Samora et al. (2020), USA  | Survey       | Academic hospitals                  | A behavior that a reasonable person would expect might | Residents, fellows, and consultants | Multiple*                                                                                                                                                                                                                                                                               | Inappropriate statistical analysis, and | Moderate     |

|                             |              |                                     |                                                                                                                                                                                |                  |                                                       |                                                                                                                                                |      |
|-----------------------------|--------------|-------------------------------------|--------------------------------------------------------------------------------------------------------------------------------------------------------------------------------|------------------|-------------------------------------------------------|------------------------------------------------------------------------------------------------------------------------------------------------|------|
|                             |              |                                     | victimize, humiliate, undermine, or threaten a person to whom the behavior is directed                                                                                         |                  |                                                       | low response rate                                                                                                                              |      |
| Brown et al. (2020), Canada | Survey       | Academic hospitals                  | Gender-based discrimination included belittling remarks, inappropriate comments and jokes, denial of opportunities, and behaviors that are perceived as hostile or humiliating | Residents        | Nurses, consultants, and residents                    | Inadequate sample size, analysis not conducted in full coverage of the sample, inappropriate identification of bullying, and low response rate | High |
| Zhang et al. (2020), USA    | Survey       | Academic and non-academic hospitals | NAQ <sup>‡</sup> used                                                                                                                                                          | Residents        | Consultants, co-residents, nurses, and administrators | Study subjects not described in details                                                                                                        | Low  |
| Lind et al. (2020), USA     | Before-After | Academic                            | Public belittlement or humiliation; physical harm; denied opportunities for training or rewards, or receiving lower evaluations or grades, based                               | Medical students | Data not provided                                     | Unblinded outcome assessors, small sample size, high loss to follow-up, and analysis of change score not applied                               | High |

1  
2  
3  
4  
5  
6  
7  
8  
9  
10  
11  
12  
13  
14  
15  
16  
17  
18  
19  
20  
21  
22  
23  
24  
25  
26  
27  
28  
29  
30  
31  
32  
33  
34  
35  
36  
37  
38  
39  
40  
41  
42  
43  
44  
45  
46  
47

|                                       |        |                                     |                                                                                                                                                             |                  |                                                         |                                                                                                       |          |
|---------------------------------------|--------|-------------------------------------|-------------------------------------------------------------------------------------------------------------------------------------------------------------|------------------|---------------------------------------------------------|-------------------------------------------------------------------------------------------------------|----------|
|                                       |        |                                     | solely on gender; and being subjected to racially or ethnically offensive remarks                                                                           |                  |                                                         |                                                                                                       |          |
| Colenbrander et al. (2020), Australia | Survey | Academic hospitals                  | Data not provided                                                                                                                                           | Medical students | Data not provided                                       | Inadequate sample size, analysis plan, data analysis coverage, and unreliable measurement of bullying | High     |
| Iqbal et al. (2020), Pakistan         | Survey | Academic and non-academic hospitals | NAQ* used                                                                                                                                                   | Consultants      | Data not provided                                       | Inadequate sample size and statistical analysis                                                       | Moderate |
| Elghazally et al. (2020), Egypt       | Survey | Academic                            | Behaviour that is intended to cause physical or psychological damage due to the imbalance of power, strength or status between the aggressor and the victim | Medical students | Professors (30.1%), students (51.2%), and staff (18.7%) | None                                                                                                  | Low      |
| Raj et al. (2020), USA                | Survey | Academic                            | Harassment defined as unwanted sexual advances, subtle bribery to                                                                                           | Consultants      | Data not provided                                       | None                                                                                                  | Low      |

|                                 |        |                                     |                                                                                                                                       |                                  |                                                                                           |                                                                                           |      |
|---------------------------------|--------|-------------------------------------|---------------------------------------------------------------------------------------------------------------------------------------|----------------------------------|-------------------------------------------------------------------------------------------|-------------------------------------------------------------------------------------------|------|
|                                 |        |                                     | engage in sexual behavior, threats to engage in sexual behavior, or coercive advances                                                 |                                  |                                                                                           |                                                                                           |      |
| Kemper et al. (2020), USA       | Survey | Academic and non-academic hospitals | Data not provided                                                                                                                     | Residents                        | Faculty (43%), clinical staff (60%), resident (28%), medical student (3%), and admin (9%) | None                                                                                      | Low  |
| Stasenko et al. (2020), USA     | Survey | Academic and non-academic hospitals | Harassment is defined as an unwelcome sexual advances or other forms of physical and verbal aggression that is sexual in nature       | Consultants and fellows          | Data not provided                                                                         | Low response rate                                                                         | Low  |
| Afkhamzadeh et al. (2019), Iran | Survey | Academic hospitals                  | Physical or verbal violence, or bullying                                                                                              | Medical students and consultants | Data not provided                                                                         | None                                                                                      | Low  |
| Wolfman et al. (2019), USA      | Survey | Academic and non-academic hospitals | Repeated negative actions and practices that are carried out as a deliberate act or unconsciously. These behaviors cause humiliation, | Residents                        | Data not provided                                                                         | Inappropriate sampling frame, and identification of bullying condition, low response rate | High |

1  
2  
3  
4  
5  
6  
7  
8  
9  
10  
11  
12  
13  
14  
15  
16  
17  
18  
19  
20  
21  
22  
23  
24  
25  
26  
27  
28  
29  
30  
31  
32  
33  
34  
35  
36  
37  
38  
39  
40  
41  
42  
43  
44  
45  
46  
47

|                                    |        |                                     |                                                                                            |                                    |                                                                                            |                                                                                    |          |
|------------------------------------|--------|-------------------------------------|--------------------------------------------------------------------------------------------|------------------------------------|--------------------------------------------------------------------------------------------|------------------------------------------------------------------------------------|----------|
|                                    |        |                                     | offense and distress to the target                                                         |                                    |                                                                                            |                                                                                    |          |
| Chowdhury et al. (2019), USA       | Survey | Academic and non-academic hospitals | NAQ* used                                                                                  | Residents                          | Data not provided                                                                          | Inadequate sample size, description of subjects and setting, and low response rate | High     |
| Ayyala et al. (2019), USA          | Survey | Academic and non-academic hospitals | Harassment that occurs repeatedly (> once) by an individual in a position of greater power | Residents                          | Data not provided                                                                          | Inappropriate methods of bullying identification                                   | Low      |
| Hu et al. (2019), USA              | Survey | Academic and non-academic hospitals | Discrimination and harassment on the basis of gender, race, or pregnancy or childcare      | Residents                          | Consultants (52.4%), admin (1.1%), co-residents (20.2%), and nurses (7.9%)                 | None                                                                               | Low      |
| Brown et al. (2019), International | Survey | Academic and non-academic hospitals | Data not provided                                                                          | Residents or fellow and consultant | Data not provided                                                                          | Inappropriate methods of bullying identification and low response rate             | Moderate |
| Zurayk et al. (2019), USA          | Survey | Academic and non-academic clinics   | Study-based sexual experience questionnaire                                                | Consultants and residents          | Residents (60%), lecturers (33%), professors (44%), nurses (10%), and hospital staff (29%) | Inadequate sample size, inappropriate sample frame                                 | Moderate |

|                                     |              |                                     |                                                                                                                                          |                                   |                                                                   |                                                                                                               |          |
|-------------------------------------|--------------|-------------------------------------|------------------------------------------------------------------------------------------------------------------------------------------|-----------------------------------|-------------------------------------------------------------------|---------------------------------------------------------------------------------------------------------------|----------|
| Castillo-Angeles et al. (2019), USA | Before-after | Academic hospital                   | Study-based abuse sensitivity questionnaire                                                                                              | Residents                         | Data not provided                                                 | Small sample size, inadequate blinding of outcome assessors, and loss to follow-up                            | High     |
| Kappy et al. (2019), USA            | Before-after | Academic hospital                   | Harassment; discrimination; humiliation; physical punishment; and the use of grading and other forms of assessment in a punitive manner. | Medical students                  | Consultant, co-resident, and nurse                                | Intervention and outcomes not well defined                                                                    | Moderate |
| D'Agostino et al. (2019), USA       | Survey       | Academic and non-academic hospitals | Abuse or harassment particularly of a sexual type                                                                                        | Residents, fellows, and attending | Consultants (64.5%), co-resident (38.7%), ancillary staff (25.8%) | Inappropriate methods of bullying identification, Inadequate statistical analysis plan, and low response rate | High     |
| Chung et al. (2018), USA            | Survey       | Academic                            | Feeling of intimidation, dehumanization, or threat to grade, or career advancement                                                       | Medical students                  | Attending physician (68.4%), resident (26.3%), and nurse (10.5%)  | Inappropriate sample methods, Non-validated method of bullying identification                                 | High     |



1  
2  
3  
4  
5  
6  
7  
8  
9  
10  
11  
12  
13  
14  
15  
16  
17  
18  
19  
20  
21  
22  
23  
24  
25  
26  
27  
28  
29  
30  
31  
32  
33  
34  
35  
36  
37  
38  
39  
40  
41  
42  
43  
44  
45  
46  
47

|                                     |              |                                     |                                                                                |                                                  |                                                                                                           |                                                                                                                                                                    |          |
|-------------------------------------|--------------|-------------------------------------|--------------------------------------------------------------------------------|--------------------------------------------------|-----------------------------------------------------------------------------------------------------------|--------------------------------------------------------------------------------------------------------------------------------------------------------------------|----------|
| Kemp et al. (2018), USA             | Survey       | Academic hospital                   | Disrespect for the dignity of others that interferes with the learning process | Residents, consultants, and fellows              | Data not provided                                                                                         | Inadequate statistical analysis plan, and low response rate                                                                                                        | Moderate |
| Benmore et al. (2018), England      | Before-after | Academic hospital*                  | Data not provided                                                              | Residents                                        | Senior consultants                                                                                        | Insufficient enrollment, inadequate sample size, no blinding of outcome assessors, high loss to follow-up, lack of statistical analysis or ITS <sup>†</sup> design | High     |
| Duru et al. (2018), Turkey          | Survey       | Academic hospital                   | Data not provided                                                              | Consultants, researchers, administrators, nurses | Specific occupations of bullies not specified                                                             | Inappropriate sampling and inadequate sample size                                                                                                                  | Moderate |
| Chambers et al. (2018), New Zealand | Survey       | Academic and non-academic hospitals | Data not provided                                                              | Specialist Consultants                           | Primarily male. Senior medical staff (52.5%), non-clinical managers (31.8%), and clinical leaders (24.9%) | Low response rate                                                                                                                                                  | Low      |
| House et al. (2018), USA            | Before-after | Academic hospital                   | Data not provided                                                              | Medical Students                                 | Faculty most frequently were the source of bullying followed by residents. Exact                          | Insufficient enrollment, inadequate sample size, no blinding of outcome                                                                                            | High     |

|                                     |        |                                     |                                                                                                                                                           |                    |                                                                                        |                                                                                                                                  |          |
|-------------------------------------|--------|-------------------------------------|-----------------------------------------------------------------------------------------------------------------------------------------------------------|--------------------|----------------------------------------------------------------------------------------|----------------------------------------------------------------------------------------------------------------------------------|----------|
|                                     |        |                                     |                                                                                                                                                           |                    | breakdown not specified                                                                | assessors, outcomes not clearly described, lack of statistical analysis, individual-level analysis or ITS design                 |          |
| Kulaylat et al. (2017), USA         | Survey | Academic hospital                   | Verbal abuse, specialty-choice discrimination, non-educational tasks, withholding/denying learning opportunities, neglect and gender/racial insensitivity | Medical Students   | Faculty (57%), residents, fellows (49%), and nurses (33%)                              | Inappropriate sampling, inadequate sample size, classification bias, and non-validated identification or measurement of bullying | High     |
| Bernotaite et al. (2017), Lithuania | Survey | Academic hospitals                  | Data not provided                                                                                                                                         | Family Consultants | Supervisor (25.3%), colleague (9.8%), subordinate (2.9%)                               | Inappropriate sampling, inadequate sample size, and coverage bias                                                                | Moderate |
| Chrysafi et al. (2017), Greece      | Survey | Academic and non-academic hospitals | Data not provided                                                                                                                                         | Consultants        | Surgeons most frequently followed by internal medicine consultants, then radiologists/ | Low response rate and coverage bias                                                                                              | Moderate |

1  
2  
3  
4  
5  
6  
7  
8  
9  
10  
11  
12  
13  
14  
15  
16  
17  
18  
19  
20  
21  
22  
23  
24  
25  
26  
27  
28  
29  
30  
31  
32  
33  
34  
35  
36  
37  
38  
39  
40  
41  
42  
43  
44  
45  
46  
47

|                                    |        |                                     |                                              |                             |                                                                                                                                                                                              |                                                                       |          |
|------------------------------------|--------|-------------------------------------|----------------------------------------------|-----------------------------|----------------------------------------------------------------------------------------------------------------------------------------------------------------------------------------------|-----------------------------------------------------------------------|----------|
|                                    |        |                                     |                                              |                             | laboratory consultants                                                                                                                                                                       |                                                                       |          |
| Kapoor et al. (2016), India        | Survey | Academic hospital                   | Data not provided                            | Medical students            | Data not provided                                                                                                                                                                            | Inappropriate sampling and inadequate description of study population | Moderate |
| Chadaga et al. (2016), USA         | Survey | Academic hospitals                  | NAQ <sup>‡</sup> used                        | Residents and fellows       | Consultants (29%), nurses (27%), patients (23%), peers (19%)                                                                                                                                 | Low response rate, inadequate sample size, and coverage bias          | Moderate |
| Llewellyn et al. (2016), Australia | Survey | Academic hospitals                  | Data not provided                            | Residents                   | Senior medical staff: (58.3%) in 2015, (60.6%) in 2016. Non-medical staff (33.2%) 2015, (33.9%) 2016, Manager (5.2%) in 2015, (1.2%) in 2016, junior resident (3.3%) in 2015, (4.3%) in 2016 | Low response rate, biased sampling, coverage and classification bias  | High     |
| Rouse et al. (2016), USA           | Survey | Academic clinics                    | NAQ used                                     | Family medicine consultants | Data not provided                                                                                                                                                                            | Low response rate                                                     | Low      |
| Shabazz et al. (2016), UK          | Survey | Academic and non-academic hospitals | Belittle and undermine an individual's work; | Gynecology consultants      | Senior consultants (50.9%), junior consultants                                                                                                                                               | Low response rate, and classification bias                            | Moderate |

|                               |        |                    |                                                                                                                                                                                               |                                           |                                                                                                                                                                                                                                                 |                                            |          |
|-------------------------------|--------|--------------------|-----------------------------------------------------------------------------------------------------------------------------------------------------------------------------------------------|-------------------------------------------|-------------------------------------------------------------------------------------------------------------------------------------------------------------------------------------------------------------------------------------------------|--------------------------------------------|----------|
|                               |        |                    | undermining an individual's integrity; persistent and unjustified criticism and monitoring of work; freezing out, ignoring or excluding and continual undervaluing of an individual's effort. |                                           | (22.3%),<br>medical director<br>(4.5%)                                                                                                                                                                                                          |                                            |          |
| Peres et al. (2016), Brazil   | Survey | Academic hospital  | Data not provided                                                                                                                                                                             | Medical students                          | Data not provided                                                                                                                                                                                                                               | Low response rate, and classification bias | Moderate |
| Ling et al. (2016), Australia | Survey | Academic hospitals | NAQ used                                                                                                                                                                                      | General surgery residents and consultants | For trainee victims: staff surgeon (48%), trainee surgeon (13%), admin (13%), nurses (11%), other consultant (6%)<br>For consultant victims; (31%) staff surgeon, (28%) admin, (13%) other consultant, (11%) nurses, other (10%), trainees (4%) | Low response rate                          | Low      |

1  
2  
3  
4  
5  
6  
7  
8  
9  
10  
11  
12  
13  
14  
15  
16  
17  
18  
19  
20  
21  
22  
23  
24  
25  
26  
27  
28  
29  
30  
31  
32  
33  
34  
35  
36  
37  
38  
39  
40  
41  
42  
43  
44  
45  
46  
47

|                                                  |              |                    |                                                                                            |                                                |                                                                                     |                                                                                                                                          |          |
|--------------------------------------------------|--------------|--------------------|--------------------------------------------------------------------------------------------|------------------------------------------------|-------------------------------------------------------------------------------------|------------------------------------------------------------------------------------------------------------------------------------------|----------|
| Kulaylat et al. (2016), USA                      | Before-after | Academic hospital  | Data not provided                                                                          | Medical Students                               | Faculty (57%), residents/fellows (49%), and nurses (33%)                            | Inadequate sample size, no blinding of outcome assessors                                                                                 | Moderate |
| Ahmadipour et al. (2016), Iran                   | Survey       | Academic hospital  | Being assigned tasks as punishment, being threatened with an unjustly bad score or failure | Medical students, interns and residents        | Data not provided                                                                   | Inadequate sample size                                                                                                                   | Low      |
| Jagsi et al. (2016), USA                         | Survey       | Academic hospital  | Data not provided                                                                          | Consultants who won a career advancement award | Data not provided                                                                   | Inadequate sampling frame and classification bias                                                                                        | Moderate |
| Crebbin et al. (2015), Australia and New Zealand | Survey       | Academic hospitals | Data not provided                                                                          | Residents, fellows and consultants             | Surgical consultants (50%), other medical consultants (24%) and nursing staff (26%) | Low response rate                                                                                                                        | Low      |
| Cresswell et al. (2016), UK                      | Before-after | Academic hospital  | Data not provided                                                                          | Residents                                      | Data not provided                                                                   | Insufficient description of study purpose, inadequate enrollment and sample size, no blinding of outcome assessors, outcomes not clearly | High     |

|                                        |        |                      |                                                                                                                                                                        |                             |                                                                                      |                                                                                        |          |
|----------------------------------------|--------|----------------------|------------------------------------------------------------------------------------------------------------------------------------------------------------------------|-----------------------------|--------------------------------------------------------------------------------------|----------------------------------------------------------------------------------------|----------|
|                                        |        |                      |                                                                                                                                                                        |                             |                                                                                      | described, lack of statistical analysis or ITS design and high loss to follow-up       |          |
| Loerbroks et al. (2015), Germany       | Survey | Academic hospitals   | Data not provided                                                                                                                                                      | Residents                   | Data not provided                                                                    | None                                                                                   | Low      |
| Malinauskiene et al. (2014), Lithuania | Survey | Non-academic clinics | NAQ used                                                                                                                                                               | Family medicine consultants | Bullying from patients (11.8%), from colleagues by (8.4%), from superiors by (26.6%) | None                                                                                   | Low      |
| Mavis et al. (2014), USA               | Survey | Academic hospitals   | Mistreatment either intentional or unintentional occurs when behavior shows disrespect for the dignity of others and unreasonably interferes with the learning process | Medical students            | Clinical faculty in the hospital (31%) residents/interns (28%), nurses (11%)         | Low response rate, inadequate description of study population and statistical analysis | Moderate |
| Oser et al. (2014), USA                | Survey | Academic hospital    | Data not provided                                                                                                                                                      | Medical students            | Residents > clerkship faculty > other attendings > other students >                  | None                                                                                   | Low      |

1  
2  
3  
4  
5  
6  
7  
8  
9  
10  
11  
12  
13  
14  
15  
16  
17  
18  
19  
20  
21  
22  
23  
24  
25  
26  
27  
28  
29  
30  
31  
32  
33  
34  
35  
36  
37  
38  
39  
40  
41  
42  
43  
44  
45  
46  
47

|                            |              |                   |                                                                                                                                               |                  |                                                                                                                           |                                                                                      |      |
|----------------------------|--------------|-------------------|-----------------------------------------------------------------------------------------------------------------------------------------------|------------------|---------------------------------------------------------------------------------------------------------------------------|--------------------------------------------------------------------------------------|------|
|                            |              |                   |                                                                                                                                               |                  | preceptors = nurses                                                                                                       |                                                                                      |      |
| Oku et al. (2014), Nigeria | Survey       | Academic hospital | Data not provided                                                                                                                             | Medical students | Medical students (23.7%), consultants (21.7%), lecturers (17.5%), consultants (16.5%), nurses (16.5%), other staff (4.1%) | None                                                                                 | Low  |
| Gan et al. (2014), Canada  | Survey       | Academic hospital | Data not provided                                                                                                                             | Medical students | Consultants                                                                                                               | Low response rate, inappropriate sampling, small sample size and classification bias | High |
| Fried et al. (2015), USA   | Before-after | Academic hospital | Power mistreatment defined as “made to feel intimidated, dehumanized, or had a threat made about a recommendation, your grade, or your career | Medical students | Residents (49.7%), clinical faculty (36.9%), preclinical faculty (7.9%)                                                   | None                                                                                 | Low  |

|                               |        |                    |                                                                                                                                                                                                                                                                                                 |                  |                                                                                                                                         |                                                                                                              |      |
|-------------------------------|--------|--------------------|-------------------------------------------------------------------------------------------------------------------------------------------------------------------------------------------------------------------------------------------------------------------------------------------------|------------------|-----------------------------------------------------------------------------------------------------------------------------------------|--------------------------------------------------------------------------------------------------------------|------|
| Al-Shafae et al. (2013), Oman | Survey | Academic hospitals | Being coerced into carrying out personal services unrelated to the expected role of interns and instances in which interns were excluded from reasonable learning opportunities offered to others, or threatened with failure or poor evaluations for reasons unrelated to academic performance | Residents        | Internal medicine (60.3%), surgery (29%), pediatrics (15.5%), specialists (51.7%), consultants (50%), residents (12.1%), nurses (24.1%) | Inappropriate sampling, inadequate sample size, inadequate description of study population and coverage bias | High |
| Owoaje et al. (2012), Nigeria | Survey | Academic hospital  | Data not provided                                                                                                                                                                                                                                                                               | Medical Students | Consultants (69.1%), residents/fellows (52.4%), other students (15.7%), nurses (7.8%), laboratory technicians (4.1%)                    | Low response rate                                                                                            | Low  |



1  
2  
3  
4  
5  
6  
7  
8  
9  
10  
11  
12  
13  
14  
15  
16  
17  
18  
19  
20  
21  
22  
23  
24  
25  
26  
27  
28  
29  
30  
31  
32  
33  
34  
35  
36  
37  
38  
39  
40  
41  
42  
43  
44  
45  
46  
47

|                                 |              |                                     |                                                     |                    |                                                                                                  |                                                                                                                                                       |          |
|---------------------------------|--------------|-------------------------------------|-----------------------------------------------------|--------------------|--------------------------------------------------------------------------------------------------|-------------------------------------------------------------------------------------------------------------------------------------------------------|----------|
| Askew et al. (2012), Australia  | Survey       | Academic and non-academic hospitals | Data not provided                                   | Consultants        | Consultants (44%), managers (27%), patients (15%), nurses/midwives (4%), junior consultants (1%) | Low response rate                                                                                                                                     | Low      |
| Meloni et al. (2011), Australia | Before-after | Academic hospital                   | Data not provided                                   | Hospital employees | Data not provided                                                                                | Lack of blinding of outcome assessors, high loss to follow-up, lack of statistical analysis or ITS design, and unit of analysis not clearly described | High     |
| Dikmetas et al. (2011), Turkey  | Survey       | Academic hospital                   | Data not provided                                   | Residents          | Surgeons > Internists                                                                            | Low response rate                                                                                                                                     | Moderate |
| Eriksen et al. (2011), Norway   | Survey       | Academic hospital                   | NAQ used                                            | Hospital employees | Colleagues. Specific occupations not described                                                   | Low response rate, inappropriate sampling and inadequate statistical analysis                                                                         | Moderate |
| Imran et al. (2010), Pakistan   | Survey       | Academic hospitals                  | Threats to professional status, threats to personal | Residents          | Consultants                                                                                      | Inappropriate sampling, classification                                                                                                                | Moderate |

|                                       |              |                    |                                                                                                                       |             |                                                                                                                                                        |                                                                                                                                                                |      |
|---------------------------------------|--------------|--------------------|-----------------------------------------------------------------------------------------------------------------------|-------------|--------------------------------------------------------------------------------------------------------------------------------------------------------|----------------------------------------------------------------------------------------------------------------------------------------------------------------|------|
|                                       |              |                    | standing, isolation, overwork, and destabilization                                                                    |             |                                                                                                                                                        | and coverage bias                                                                                                                                              |      |
| Ogunsemi et al. (2010), Nigeria       | Survey       | Academic hospital  | Data not provided                                                                                                     | Residents   | Administrative staff (58%), from the hospital chief executive( 41.4%), from patient relatives (40.4%), nurses (32.7%), residents (30%), patients (20%) | Inadequate sample size                                                                                                                                         | Low  |
| Best et al. (2010), USA               | Before-after | Academic hospital  | Data not provided                                                                                                     | Unspecified | Data not provided                                                                                                                                      | Study purpose not clearly described, insufficient enrollment, no blinding of outcome assessors, lack of statistical or individual-level analysis or ITS design | High |
| Nagata-Kobayashi et al. (2009), Japan | Survey       | Academic hospitals | Assigned you tasks as punishment; threatened to fail you unfairly in residency; competed maliciously or unfairly with | Residents   | Surgery (27.6%), internal medicine (21.4%), emergency medicine (11.5%), anaesthesia                                                                    | Low response rate                                                                                                                                              | Low  |

1  
2  
3  
4  
5  
6  
7  
8  
9  
10  
11  
12  
13  
14  
15  
16  
17  
18  
19  
20  
21  
22  
23  
24  
25  
26  
27  
28  
29  
30  
31  
32  
33  
34  
35  
36  
37  
38  
39  
40  
41  
42  
43  
44  
45  
46  
47

|                                  |        |                                     |                                                                                                      |             |                                                                                                 |                                                                               |          |
|----------------------------------|--------|-------------------------------------|------------------------------------------------------------------------------------------------------|-------------|-------------------------------------------------------------------------------------------------|-------------------------------------------------------------------------------|----------|
|                                  |        |                                     | you; made negative remarks to you about becoming a consultant or pursuing a career in medicine       |             | (11.3%).<br>Consultants 34.1%, patients 21.7%, nurses 17.2%                                     |                                                                               |          |
| Scott et al. (2008), New Zealand | Survey | Academic hospital                   | A threat to professional status and personal standing, isolation, enforced overwork, destabilization | Residents   | Consultants (30%), nurses (30%), patients (25%), radiologists (8%), residents/fellows (7%)      | Low response rate, inadequate sample size and description of study population | Moderate |
| Gadit et al. (2007), Pakistan    | Survey | Academic and non-academic hospitals | Data not provided                                                                                    | Consultants | Senior colleagues                                                                               | Inadequate sample size                                                        | Low      |
| Shrier et al. (2007), USA        | Survey | Academic and non-academic hospitals | Data not provided                                                                                    | Consultants | Colleagues (24%), patients (19%), teachers (18%), supervisors (15%),                            | Inappropriate sampling, inadequate sample size, and coverage bias             | Moderate |
| Cheema et al. (2005), Ireland    | Survey | Academic hospitals                  | Data not provided                                                                                    | Residents   | Senior residents (51-70%), nursing staff 47-59%, administration (15%-16%), colleagues (12%-13%) | Low response rate                                                             | Low      |

|                               |        |                      |                   |                  |                                                                                                               |                                                                                                                          |      |
|-------------------------------|--------|----------------------|-------------------|------------------|---------------------------------------------------------------------------------------------------------------|--------------------------------------------------------------------------------------------------------------------------|------|
| Rautio et al. (2005), Finland | Survey | Academic hospital    | Data not provided | Medical students | Lecturers (27.9%), research/senior research fellows (27.7%), professors (16.6%), associate professors (13.6%) | Low response rate, inappropriate sampling, inadequate sample size, and coverage bias                                     | High |
| Wear et al. (2005), USA       | Survey | Academic hospital    | Data not provided | Medical students | General surgeons and obstetricians                                                                            | Low response rate, inappropriate sampling, inadequate sample size, classification and lack of validated measurement tool | High |
| Carr et al. (2000), USA       | Survey | Academic hospitals   | Data not provided | Consultants      | Superiors and colleagues                                                                                      | None                                                                                                                     | Low  |
| Quine (1999), UK              | Survey | Non-academic clinics | Data not provided | Consultants      | 54% greater seniority, 34% same seniority, 12% less senior. 49% of bullies older than victim                  | None                                                                                                                     | Low  |

\*Regarding sexual harassment: the most common sources were attending surgeons (69% overall, 71% female, 18% male); trainee (46% overall, 47% female, 9% male); attending nonsurgical (22%, 22% female, 18% male); other allied health professionals (16%, 15% female, 36% male); nursing (14%, 12% female, 73% male); admin staff (4%, 2% female, 36% male). Re: harassing behaviors: the most common sources were attending orthopaedic surgeon (76% overall, 75% female, 86% male); trainee (30%, 32% female, 14% male); attending physician; nonsurgical (e.g., anesthesiologist, internist) (20%, 21% female, 11% male, nursing staff (18%, 18% female, 20% male); administration staff (13%, 12% female, 17% male); and other allied health professional (9%, 10% female, 9% male)

1  
2  
3  
4  
5  
6  
7  
8  
9  
10  
11  
12  
13  
14  
15  
16  
17  
18  
19  
20  
21  
22  
23  
24  
25  
26  
27  
28  
29  
30  
31  
32  
33  
34  
35  
36  
37  
38  
39  
40  
41  
42  
43  
44  
45  
46  
47

\*\*Academic hospitals/clinics were defined as teaching hospitals/clinics with a university affiliation  
†Interrupted time series  
‡The NAQ is the negative acts questionnaire, a validated tool for assessing the prevalence of workplace bullying

For peer review only

**Table 2: Self-reported description of specific bullying behaviours**

| Behaviour                                               | No. of studies/<br>Total studies* | Total cohort<br>No. affected/<br>total participants who<br>completed surveys on<br>behaviours (%)* | Men<br>No. affected/<br>total men who<br>completed surveys on<br>behaviours (%)† | Women<br>No. affected/<br>Total women who<br>completed surveys on<br>behaviours (%)† |
|---------------------------------------------------------|-----------------------------------|----------------------------------------------------------------------------------------------------|----------------------------------------------------------------------------------|--------------------------------------------------------------------------------------|
| <b>Threats to professional status</b>                   |                                   |                                                                                                    |                                                                                  |                                                                                      |
| Persistent unjustified criticism                        | 12/28                             | 4495/16700 (26.9)                                                                                  | 535/1690 (31.7)                                                                  | 552/1402 (39.4)                                                                      |
| Excessive monitoring of work                            | 6/28                              | 1752/6079 (28.8)                                                                                   | 442/1525 (27.7)                                                                  | 441/1298 (34.0)                                                                      |
| Intimidatory use of discipline                          | 15/28                             | 1531/19471 (7.9)                                                                                   | 366/2381 (15.4)                                                                  | 363/2209 (16.4)                                                                      |
| Spread of gossip/rumours                                | 7/28                              | 2977/10060 (29.6)                                                                                  | 88/596 (14.8)                                                                    | 94/453 (20.8)                                                                        |
| False allegations                                       | 6/28                              | 613/3796 (16.1)                                                                                    | 59/596 (9.9)                                                                     | 54/453 (11.9)                                                                        |
| Refusal of leave, training or promotion                 | 9/28                              | 1604/8551 (18.8)                                                                                   | 296/2594 (11.4)                                                                  | 458/2340 (19.6)                                                                      |
| <b>Isolation</b>                                        |                                   |                                                                                                    |                                                                                  |                                                                                      |
| Social/professional exclusion                           | 17/28                             | 6160/21099 (29.1)                                                                                  | 420/2027 (20.7)                                                                  | 1064/2814 (37.8)                                                                     |
| <b>Overwork</b>                                         |                                   |                                                                                                    |                                                                                  |                                                                                      |
| Undue pressure to produce work                          | 7/28                              | 2509/6562 (38.2)                                                                                   | 233/1525 (15.3)                                                                  | 355/1570 (22.6)                                                                      |
| Setting impossible deadlines                            | 6/28                              | 1571/6079 (25.8)                                                                                   | 164/1525 (10.8)                                                                  | 189/1298 (14.6)                                                                      |
| <b>Destabilization</b>                                  |                                   |                                                                                                    |                                                                                  |                                                                                      |
| Shifting goalposts                                      | 1/28                              | 54/417 (12.9)                                                                                      | Not reported                                                                     | Not reported                                                                         |
| Removal of areas of responsibility without consultation | 8/28                              | 1397/6193 (22.6)                                                                                   | 160/1525 (10.5)                                                                  | 171/1298 (13.2)                                                                      |

1  
2  
3  
4  
5  
6  
7  
8  
9  
10  
11  
12  
13  
14  
15  
16  
17  
18  
19  
20  
21  
22  
23  
24  
25  
26  
27  
28  
29  
30  
31  
32  
33  
34  
35  
36  
37  
38  
39  
40  
41  
42  
43  
44  
45  
46  
47

|                                                  |       |                   |                 |                 |
|--------------------------------------------------|-------|-------------------|-----------------|-----------------|
| Withholding information that affects performance | 9/28  | 3836/12503 (30.7) | 219/1553 (14.1) | 267/1328 (20.1) |
| Ordered to work below one's competence level     | 10/28 | 2934/8119 (36.1)  | 81/625 (13.0)   | 99/483 (20.5)   |

\*Total number of studies that described types of bullying behaviours, including studies that did not stratify results by sex. As a result, the denominator for the number of participants in total is not the sum of the denominators for men and women. The denominator was calculated from the total number of individuals who completed surveys on specific bullying behaviours, while the numerator was calculated from the number of individuals who indicated they experienced the specified bullying behaviour. Not all survey studies offered respondents the same options to respond to, and as a result the denominators for each bullying behaviour differ.

†Of the studies that separated data by gender or solely included the results of one gender and included the specified bullying behaviour.

peer review only

**Table 3. Self-reported impact of academic bullying**

| Effect of academic bullying                                      | No. of studies/<br>Total studies* | Total cohort<br>No. of affected<br>participants/<br>total participants who<br>completed surveys on<br>the impact of bullying<br>(%)* | Men<br>No. of affected men/<br>total men who<br>completed surveys on<br>the impact of bullying<br>(%)† | Women<br>No. of affected women/<br>total women who<br>completed surveys on<br>the impact of bullying<br>(%)† |
|------------------------------------------------------------------|-----------------------------------|--------------------------------------------------------------------------------------------------------------------------------------|--------------------------------------------------------------------------------------------------------|--------------------------------------------------------------------------------------------------------------|
| <b>Psychologic</b>                                               |                                   |                                                                                                                                      |                                                                                                        |                                                                                                              |
| Psychologic distress<br>including<br>depressive/PTSD<br>symptoms | 14/33                             | 5597/14285 (39.1)                                                                                                                    | 1750/5172 (33.8)                                                                                       | 1636/3529 (46.4)                                                                                             |
| Reduced confidence in<br>clinical skill                          | 8/33                              | 564/2112 (26.7)                                                                                                                      | 68/212 (32.1)                                                                                          | 97/597 (16.2)                                                                                                |
| <b>Career</b>                                                    |                                   |                                                                                                                                      |                                                                                                        |                                                                                                              |
| Missed career<br>opportunities                                   | 17/33                             | 2823/9442 (29.9)                                                                                                                     | 357/1898 (18.8)                                                                                        | 1104/2530 (43.6)                                                                                             |
| Considerations of quitting                                       | 7/33                              | 1034/2880 (35.9)                                                                                                                     | Not reported                                                                                           | Not reported                                                                                                 |
| Termination of<br>employment                                     | 5/33                              | 228/4419 (5.2)                                                                                                                       | 4/139 (2.9)                                                                                            | 4/150 (2.7)                                                                                                  |
| Leave of absence                                                 | 2/33                              | 50/748 (6.7)                                                                                                                         | Not reported                                                                                           | Not reported                                                                                                 |
| Self-reported worsening<br>of clinical performance               | 8/33                              | 1673/4841 (34.6)                                                                                                                     | 42/161 (26.1)                                                                                          | 22/101 (21.8)                                                                                                |

\*Total number of studies that described the impact of bullying, including studies that did not stratify results by sex. Not all participants were given the same options to select from.

†Of the studies that separated data by gender or solely included the results of one gender and included the impact of bullying.



1  
2  
3  
4  
5  
6  
7  
8  
9  
10  
11  
12  
13  
14  
15  
16  
17  
18  
19  
20  
21  
22  
23  
24  
25  
26  
27  
28  
29  
30  
31  
32  
33  
34  
35  
36  
37  
38  
39  
40  
41  
42  
43  
44  
45  
46  
47

**Table 4. Barriers to addressing academic bullying**

| <b>Barrier</b>                                 | <b>No. of studies/Total studies*</b> | <b>No. of participants/ total participants (%)</b> |
|------------------------------------------------|--------------------------------------|----------------------------------------------------|
| <b>Low reporting rates</b>                     |                                      |                                                    |
| Lack of awareness of what constitutes bullying | 5/35                                 | 73/642 (11.4)                                      |
| Lack of awareness of reporting process         | 15/35                                | 1115/4215 (26.5)                                   |
| Lack of perceived benefit                      | 9/35                                 | 667/1621 (41.1)                                    |
| Fear that bullying would worsen                | 13/35                                | 969/2696 (35.9)                                    |
| Fear of career ramifications                   | 15/35                                | 1094/2664 (41.1)                                   |
| Concerns regarding confidentiality             | 4/35                                 | 56/445 (12.6)                                      |
| <b>Institutional factors</b>                   |                                      |                                                    |
| Hierarchical nature of medicine                | 7/35                                 | Not reported                                       |
| Recurring cycle of abuse                       | 3/35                                 | Not reported                                       |
| Normalization of bullying                      | 10/35                                | Not reported                                       |
| Lack of enforcement                            | 13/35                                | 586/1400 (41.9)                                    |

\*Total number of studies that described barriers of bullying behaviours

1  
2  
3  
4  
5  
6  
7 **Figure titles and legends**

8  
9 **Figure 1: PRIMSA diagram of included studies**

10 We identified 68 articles relevant to academic bullying. We describe the reasons for exclusion at each stage of screening  
11  
12  
13  
14  
15  
16  
17  
18  
19  
20  
21  
22  
23  
24  
25  
26  
27  
28  
29  
30  
31  
32  
33  
34  
35  
36  
37  
38  
39  
40  
41  
42  
43  
44  
45  
46  
47

1  
2  
3  
4  
5  
6  
7 **Figure 2: The definition, manifestations, impact, victims, and perpetrators of academic bullying**

8  
9 Academic bullying is defined as an abuse of authority through punishing behaviours that include overwork, destabilization, and  
10 isolation. Victims are commonly men, while perpetrators are commonly male consultants. Individual and institutional factors  
11 contribute to the ongoing cycle of bullying.  
12  
13  
14  
15  
16  
17  
18  
19  
20  
21  
22  
23  
24  
25  
26  
27  
28  
29  
30  
31  
32  
33  
34  
35  
36  
37  
38  
39  
40  
41  
42  
43  
44  
45  
46  
47

1  
2  
3  
4  
5  
6  
7 **Supplementary figure S1: Search strategy**  
8

9 We included search terms relevant to academic bullying  
10  
11  
12  
13  
14  
15  
16  
17  
18  
19  
20  
21  
22  
23  
24  
25  
26  
27  
28  
29  
30  
31  
32  
33  
34  
35  
36  
37  
38  
39  
40  
41  
42

1  
2  
3  
4  
5  
6  
7  
8  
9  
10  
11  
12  
13  
14  
15  
16  
17  
18  
19  
20  
21  
22  
23  
24  
25  
26  
27  
28  
29  
30  
31  
32  
33  
34  
35  
36  
37  
38  
39  
40  
41  
42  
43  
44  
45  
46  
47

**Supplementary figure S2: Risk of bias of survey studies included in this review**

Most studies in this review had at least a moderate risk of bias. Common sources of bias included inappropriate sampling techniques and low sample sizes

For peer review only

1  
2  
3  
4  
5  
6  
7 **Supplementary figure S3: The risk of bias of before-after studies included in this review**

8  
9 Most studies in this review had at least a moderate risk of bias. Common sources of bias included lack of blinding or a control group  
10 and low sample sizes  
11  
12  
13  
14  
15  
16  
17  
18  
19  
20  
21  
22  
23  
24  
25  
26  
27  
28  
29  
30  
31  
32  
33  
34  
35  
36  
37  
38  
39  
40  
41  
42

For peer review only

1  
2  
3  
4  
5  
6  
7  
8  
9  
10  
11  
12  
13  
14  
15  
16  
17  
18  
19  
20  
21  
22  
23  
24  
25  
26  
27  
28  
29  
30  
31  
32  
33  
34  
35  
36  
37  
38  
39  
40  
41  
42  
43  
44  
45  
46  
47  
48  
49  
50  
51  
52  
53  
54  
55  
56  
57  
58  
59  
60



Figure 1: PRISMA diagram of included studies

We identified 68 articles relevant to academic bullying. We describe the reasons for exclusion at each stage of screening

93x90mm (300 x 300 DPI)



Figure 2: The definition, manifestations, impact, victims, and perpetrators of academic bullying. Academic bullying is defined as an abuse of authority through punishing behaviours that include overwork, destabilization, and isolation. Victims are commonly men, while perpetrators are commonly male consultants. Individual and institutional factors contribute to the ongoing cycle of bullying.

136x88mm (300 x 300 DPI)



**Supplementary table S1: Pooled prevalence of specific bullying behaviours by level of training**

| <b>Behaviour</b>                                        | <b>No. of studies/<br/>Total studies*</b> | <b>Medical Students<br/>No. of participants/<br/>total participants<br/>(%)*</b> | <b>Residents and<br/>fellows<br/>No. of participants/<br/>total participants<br/>(%)*</b> | <b>Consultants<br/>No. of participants/<br/>total participants<br/>(%)*</b> |
|---------------------------------------------------------|-------------------------------------------|----------------------------------------------------------------------------------|-------------------------------------------------------------------------------------------|-----------------------------------------------------------------------------|
| <b>Threats to professional status</b>                   |                                           |                                                                                  |                                                                                           |                                                                             |
| Persistent unjustified criticism                        | 10/24                                     | 200/301 (66.4)                                                                   | 3596/12708 (28.3)                                                                         | 600/2881 (20.8)                                                             |
| Excessive monitoring of work                            | 4/24                                      | Not reported                                                                     | 1020/2445 (41.7)                                                                          | 564/2824 (20.0)                                                             |
| Intimidatory use of discipline                          | 14/24                                     | 641/13914 (4.6)                                                                  | 640/3594 (17.8)                                                                           | 38/1112 (3.4)                                                               |
| Spread of gossip/rumours                                | 5/24                                      | Not reported                                                                     | 2085/6366 (32.8)                                                                          | 755/2881 (26.2)                                                             |
| False allegations                                       | 4/24                                      | Not reported                                                                     | 36/102 (35.3)                                                                             | 509/2881 (17.7)                                                             |
| Refusal of leave, training or promotion                 | 8/24                                      | 74/551 (13.4)                                                                    | 379/3441 (11.0)                                                                           | 894/3403 (26.3)                                                             |
| <b>Isolation</b>                                        |                                           |                                                                                  |                                                                                           |                                                                             |
| Social/professional exclusion                           | 16/24                                     | 418/1546 (27.0)                                                                  | 3687/12385 (29.8)                                                                         | 1272/4445 (28.6)                                                            |
| <b>Overwork</b>                                         |                                           |                                                                                  |                                                                                           |                                                                             |
| Undue pressure to produce work                          | 7/24                                      | Not reported                                                                     | 827/2928 (28.2)                                                                           | 1326/2824 (47.0)                                                            |
| Setting impossible deadlines                            | 6/24                                      | Not reported                                                                     | 351/2445 (14.4)                                                                           | 965/2824 (34.2)                                                             |
| <b>Destabilization</b>                                  |                                           |                                                                                  |                                                                                           |                                                                             |
| Shifting goalposts                                      | 1/24                                      | Not reported                                                                     | 54/654 (8.3)                                                                              | Not reported                                                                |
| Removal of areas of responsibility without consultation | 6/24                                      | 11/56 (19.6)                                                                     | 267/2503 (10.7)                                                                           | 784/2824 (27.8)                                                             |

|   |                     |      |                |                  |                  |
|---|---------------------|------|----------------|------------------|------------------|
| 1 |                     |      |                |                  |                  |
| 2 |                     |      |                |                  |                  |
| 3 |                     |      |                |                  |                  |
| 4 | Withholding         |      |                |                  |                  |
| 5 | information that    | 7/24 | Not reported   | 2465/8869 (27.8) | 1140/2824 (40.4) |
| 6 | affects performance |      |                |                  |                  |
| 7 | Ordered to work     |      |                |                  |                  |
| 8 | below one's         | 7/24 | 182/269 (67.7) | 1276/3676 (34.7) | 975/2881 (33.8)  |
| 9 | competence level    |      |                |                  |                  |

\*Total number of studies that described types of bullying behaviours that separated data by level of training

For peer review only

1  
2  
3  
4  
5  
6  
7  
8  
9  
10  
11  
12  
13  
14  
15  
16  
17  
18  
19  
20  
21  
22  
23  
24  
25  
26  
27  
28  
29  
30  
31  
32  
33  
34  
35  
36  
37  
38  
39  
40  
41  
42  
43  
44  
45  
46  
47

**Supplementary table S2: The pooled impact of academic bullying by level of training**

| <b>Effect of academic bullying</b>                      | <b>No. of studies/<br/>Total studies*</b> | <b>Medical Students<br/>No. of participants/<br/>total participants<br/>(%) *</b> | <b>Residents and<br/>fellows<br/>No. of participants/<br/>total participants<br/>(%) *</b> | <b>Consultants<br/>No. of participants/<br/>total participants<br/>(%) *</b> |
|---------------------------------------------------------|-------------------------------------------|-----------------------------------------------------------------------------------|--------------------------------------------------------------------------------------------|------------------------------------------------------------------------------|
| <b>Psychiatric</b>                                      |                                           |                                                                                   |                                                                                            |                                                                              |
| Psychiatric distress including depressive/PTSD symptoms | 12/28                                     | 422/579 (72.9)                                                                    | 2142/5256 (40.8)                                                                           | 178/996 (17.9)                                                               |
| Reduced confidence in clinical skill                    | 4/28                                      | 119/262 (45.4)                                                                    | Not reported                                                                               | 177/1259 (14.1)                                                              |
| <b>Career</b>                                           |                                           |                                                                                   |                                                                                            |                                                                              |
| Missed career opportunities                             | 14/28                                     | 484/3020 (16.0)                                                                   | 149/426 (35.0)                                                                             | 1789/5854 (30.6)                                                             |
| Considered quitting                                     | 9/28                                      | 109/317 (34.4)                                                                    | 5/100 (5.0)                                                                                | 908/2375 (38.2)                                                              |
| Terminated employment                                   | 4/28                                      | Not reported                                                                      | 135/3574 (3.8)                                                                             | 11/348 (3.2)                                                                 |
| Leave of absence                                        | 2/28                                      | Not reported                                                                      | Not reported                                                                               | 50/748 (6.7)                                                                 |
| Self-reported worsening of clinical performance         | 6/28                                      | 202/579 (34.9)                                                                    | 1168/3179 (36.7)                                                                           | 51/563 (9.1)                                                                 |

\*Total number of studies that described the impact of academic bullying and separated data by level of training

**Supplementary table S3. Suggested policies, interventions and reported outcomes**

| Intervention                               | Outcome                                                                                                                                                                                                                                                                                 |
|--------------------------------------------|-----------------------------------------------------------------------------------------------------------------------------------------------------------------------------------------------------------------------------------------------------------------------------------------|
| <b>Zero-tolerance/Anti-bullying policy</b> |                                                                                                                                                                                                                                                                                         |
| (Cheema et al., 2005)<br>*                 | Data not provided                                                                                                                                                                                                                                                                       |
| (Wear et al., 2005) *                      | Data not provided                                                                                                                                                                                                                                                                       |
| (Gadit et al., 2007) *                     | Data not provided                                                                                                                                                                                                                                                                       |
| (Nagata-Kobayashi et al., 2009) *          | Data not provided                                                                                                                                                                                                                                                                       |
| (Imran et al., 2010) *                     | Data not provided                                                                                                                                                                                                                                                                       |
| (Meloni and Austin, 2011)                  | Increased employee engagement and workplace satisfaction<br>Increased trust among victims that reports would be appropriately managed (44% to 64%)<br>Victims felt safer reporting incidents of bullying (67% to 84%)<br>Improved awareness of where and whom to report to (67% to 84%) |
| (Fried et al., 2012)                       | Reduced power abuse (43% to 30%) but no change in overall mistreatment rates                                                                                                                                                                                                            |
| (Askew et al., 2012) *                     | Data not provided                                                                                                                                                                                                                                                                       |
| (Mavis et al., 2014) *                     | Data not provided                                                                                                                                                                                                                                                                       |
| (Chadaga et al., 2016)<br>*                | Data not provided                                                                                                                                                                                                                                                                       |
| (Kapoor et al., 2016) *                    | Data not provided                                                                                                                                                                                                                                                                       |
| (Peres et al., 2016) *                     | Data not provided                                                                                                                                                                                                                                                                       |
| (Wolfman et al., 2019)<br>*                | Data not provided                                                                                                                                                                                                                                                                       |
| <b>Bullying workshops</b>                  |                                                                                                                                                                                                                                                                                         |
| (Oku et al., 2014) *                       | Data not provided                                                                                                                                                                                                                                                                       |
| (Kulaylat et al., 2016)<br>*               | Data not provided                                                                                                                                                                                                                                                                       |

|    |                                                              |                                                                    |
|----|--------------------------------------------------------------|--------------------------------------------------------------------|
| 1  |                                                              |                                                                    |
| 2  |                                                              |                                                                    |
| 3  | (Cresswell et al.,                                           |                                                                    |
| 4  | 2016) *                                                      | Data not provided                                                  |
| 5  |                                                              |                                                                    |
| 6  | (Benmore et al., 2018)                                       | Increased willingness to try to repair the harm caused by bullying |
| 7  |                                                              | and became more conscious of giving feedback                       |
| 8  | (Castillo-Angeles et                                         |                                                                    |
| 9  | al., 2019)                                                   | Bullying behaviour persisted                                       |
| 10 | (Colenbrander et al.,                                        |                                                                    |
| 11 | 2020) *                                                      | Data not provided                                                  |
| 12 | (Stasenko et al., 2020)                                      |                                                                    |
| 13 | *                                                            | Data not provided                                                  |
| 14 |                                                              |                                                                    |
| 15 | <b>Tracking and reporting mistreatment data</b>              |                                                                    |
| 16 | (Gan and Snell, 2014)                                        | No difference in mistreatment                                      |
| 17 | (Mavis et al., 2014) *                                       | Data not provided                                                  |
| 18 |                                                              |                                                                    |
| 19 | (House et al., 2018)                                         | Decreased unprofessional or disrespectful behaviour by faculty as  |
| 20 |                                                              | reported by students [4.8% (2015-16) to 1.7% (2016-17)]            |
| 21 | (Elghazally et al.,                                          |                                                                    |
| 22 | 2020) *                                                      | Data not provided                                                  |
| 23 | (Hammoud et al.,                                             |                                                                    |
| 24 | 2020) *                                                      | Data not provided                                                  |
| 25 |                                                              |                                                                    |
| 26 | <b>Staff education on bullying and the reporting process</b> |                                                                    |
| 27 | (Cheema et al., 2005)                                        |                                                                    |
| 28 | *                                                            | Data not provided                                                  |
| 29 | (Wear et al., 2005) *                                        | Data not provided                                                  |
| 30 | (Gadit et al., 2007) *                                       | Data not provided                                                  |
| 31 | (Scott et al., 2008) *                                       | Data not provided                                                  |
| 32 | (Imran et al., 2010) *                                       | Data not provided                                                  |
| 33 | (Fried et al., 2012)                                         | No change in reporting rate                                        |
| 34 | (Al-Shafae, 2013) *                                          | Data not provided                                                  |
| 35 | (Mavis et al., 2014) *                                       | Data not provided                                                  |
| 36 | (Oku et al., 2014) *                                         | Data not provided                                                  |
| 37 |                                                              |                                                                    |
| 38 |                                                              |                                                                    |
| 39 |                                                              |                                                                    |
| 40 |                                                              |                                                                    |
| 41 |                                                              |                                                                    |
| 42 |                                                              |                                                                    |
| 43 | 5                                                            |                                                                    |
| 44 |                                                              |                                                                    |
| 45 |                                                              |                                                                    |
| 46 |                                                              |                                                                    |
| 47 |                                                              |                                                                    |

|    |                                                            |                                           |
|----|------------------------------------------------------------|-------------------------------------------|
| 1  |                                                            |                                           |
| 2  |                                                            |                                           |
| 3  | (Crebbin et al., 2015)                                     | Data not provided                         |
| 4  | *                                                          |                                           |
| 5  | (Chadaga et al., 2016)                                     | Data not provided                         |
| 6  | *                                                          |                                           |
| 7  |                                                            |                                           |
| 8  | (Peres et al., 2016) *                                     | Data not provided                         |
| 9  | (Chung et al., 2018) *                                     | Data not provided                         |
| 10 |                                                            |                                           |
| 11 | (D'Agostino et al.,                                        | Data not provided                         |
| 12 | 2019) *                                                    |                                           |
| 13 | (Chowdhury et al.,                                         | Data not provided                         |
| 14 | 2019) *                                                    |                                           |
| 15 | (Zurayk et al. 2019) *                                     | Data not provided                         |
| 16 |                                                            |                                           |
| 17 | (Colenbrander et al.,                                      | Data not provided                         |
| 18 | 2020) *                                                    |                                           |
| 19 | (Elghazally et al.,                                        | Data not provided                         |
| 20 | 2020) *                                                    |                                           |
| 21 | (Lind et al. 2020)                                         | Multiple effect**                         |
| 22 |                                                            |                                           |
| 23 | (Brown et al., 2020) *                                     | Data not provided                         |
| 24 | <b>Develop a committee to handle and support reporting</b> |                                           |
| 25 | (Gadit et al., 2007) *                                     | Data not provided                         |
| 26 |                                                            |                                           |
| 27 | (Best et al., 2010)                                        | Resolutions reached 96% of formal reports |
| 28 | (Kapoor et al., 2016) *                                    | Data not provided                         |
| 29 |                                                            |                                           |
| 30 | (Kemp et al., 2018) *                                      | Data not provided                         |
| 31 | (Kappy et al., 2019)                                       | Fewer comments on mistreatment            |
| 32 | (Ayyala et al., 2019) *                                    | Data not provided                         |
| 33 |                                                            |                                           |
| 34 | (Brown et al., 2019) *                                     | Data not provided                         |
| 35 | (Lind et al. 2020)                                         | Multiple effects**                        |
| 36 | (Samora et al., 2020) *                                    | Data not provided                         |
| 37 |                                                            |                                           |
| 38 | (Hammoud et al.,                                           | Data not provided                         |
| 39 | 2020) *                                                    |                                           |

#### Accessible and confidential reporting

|    |                         |                                                           |
|----|-------------------------|-----------------------------------------------------------|
| 1  |                         |                                                           |
| 2  |                         |                                                           |
| 3  | (Imran et al., 2010) *  | Data not provided                                         |
| 4  |                         |                                                           |
| 5  | (Fried et al., 2012)    | Reduced power abuse (43% to 30%) but no change in overall |
| 6  |                         | mistreatment rates                                        |
| 7  | (Askew et al., 2012) *  | Data not provided                                         |
| 8  | (Al-Shafae, 2013) *     | Data not provided                                         |
| 9  |                         |                                                           |
| 10 | (Crebbin et al., 2015)  | Data not provided                                         |
| 11 | *                       |                                                           |
| 12 | (Mavis et al., 2014) *  | Data not provided                                         |
| 13 |                         |                                                           |
| 14 | (Colenbrander et al.,   | Data not provided                                         |
| 15 | 2020) *                 |                                                           |
| 16 | (Brown et al. 2019) *   | Data not provided                                         |
| 17 | (Samora et al., 2020) * | Data not provided                                         |

---

\*Suggested approach that had not been implemented

\*\* In this study, a substantial decrease in mistreatment (from 62.9% to 40.3%), fear of reporting (from 42.2% to 37.1%), fear of reprisal (from 28.9% to 22.6%), and an increase in knowledge of reporting increased (from 88.8% to 94.2%) was observed.

**Supplementary figure S1: Search strategy**

1. Exp bullying
2. Exp medicine
3. Exp hospitals
4. (sabotage or mistreat\* or discredit or humiliation or harassment or demean or bully\* or belittle or intimidate or disrespect or coerce or ignore or undermine or exclude or libel or slander or criticism or overwork\*).ti
5. (Workplace or career or professional or academic or promotion\* or employment or job or profession or reputation or academia).mp
6. (medicine or residency\* or "medical school" or "clinical training" or hospital or internship or fellow\* or "junior doctor" or "house officer" or "clinical clerk" or "attending physician" or physician or doctor or clinician or hierarchical system or "clinician-scientist" or learner or faculty or "NHS").ti,ab.
7. Exp aggression
8. 1 or 4 or 7
9. 5 and 8
10. 2 or 3 or 6
11. 9 and 10



1  
2  
3  
4  
5  
6  
7  
8  
9  
10  
11  
12  
13  
14  
15  
16  
17  
18  
19  
20  
21  
22  
23  
24  
25  
26  
27  
28  
29  
30  
31  
32  
33  
34  
35  
36  
37  
38  
39  
40  
41  
42  
43  
44  
45  
46  
47  
48  
49  
50  
51  
52  
53  
54  
55  
56  
57  
58  
59  
60

|                  | Has the sample frame appropriate to address the target population? | Were study participants recruited in an appropriate way? | Was the sample size adequate? | Were the study subjects and the setting described in detail? | Was the response rate appropriate to the target population? | Was the response rate adequate to answer the research question? | Were there appropriate statistical analyses? | Was the response rate managed appropriately? |
|------------------|--------------------------------------------------------------------|----------------------------------------------------------|-------------------------------|--------------------------------------------------------------|-------------------------------------------------------------|-----------------------------------------------------------------|----------------------------------------------|----------------------------------------------|
| Alhamedeh 2019   | ●                                                                  | ●                                                        | ●                             | ●                                                            | ●                                                           | ●                                                               | ●                                            | ●                                            |
| Ahmadiyoun 2016  | ●                                                                  | ●                                                        | ●                             | ●                                                            | ●                                                           | ●                                                               | ●                                            | ●                                            |
| Al-Shalabi 2013  | ●                                                                  | ●                                                        | ●                             | ●                                                            | ●                                                           | ●                                                               | ●                                            | ●                                            |
| Aslani 2012      | ●                                                                  | ●                                                        | ●                             | ●                                                            | ●                                                           | ●                                                               | ●                                            | ●                                            |
| Ayala 2019       | ●                                                                  | ●                                                        | ●                             | ●                                                            | ●                                                           | ●                                                               | ●                                            | ●                                            |
| Bernatche 2017   | ●                                                                  | ●                                                        | ●                             | ●                                                            | ●                                                           | ●                                                               | ●                                            | ●                                            |
| Brown 2019       | ●                                                                  | ●                                                        | ●                             | ●                                                            | ●                                                           | ●                                                               | ●                                            | ●                                            |
| Brown 2020       | ●                                                                  | ●                                                        | ●                             | ●                                                            | ●                                                           | ●                                                               | ●                                            | ●                                            |
| Carr 2000        | ●                                                                  | ●                                                        | ●                             | ●                                                            | ●                                                           | ●                                                               | ●                                            | ●                                            |
| Chadler 2016     | ●                                                                  | ●                                                        | ●                             | ●                                                            | ●                                                           | ●                                                               | ●                                            | ●                                            |
| Chandani 2018    | ●                                                                  | ●                                                        | ●                             | ●                                                            | ●                                                           | ●                                                               | ●                                            | ●                                            |
| Chenina 2005     | ●                                                                  | ●                                                        | ●                             | ●                                                            | ●                                                           | ●                                                               | ●                                            | ●                                            |
| Chenistry 2019   | ●                                                                  | ●                                                        | ●                             | ●                                                            | ●                                                           | ●                                                               | ●                                            | ●                                            |
| Chyauk 2017      | ●                                                                  | ●                                                        | ●                             | ●                                                            | ●                                                           | ●                                                               | ●                                            | ●                                            |
| Chung 2018       | ●                                                                  | ●                                                        | ●                             | ●                                                            | ●                                                           | ●                                                               | ●                                            | ●                                            |
| Colebrander 2020 | ●                                                                  | ●                                                        | ●                             | ●                                                            | ●                                                           | ●                                                               | ●                                            | ●                                            |
| Crebbin 2015     | ●                                                                  | ●                                                        | ●                             | ●                                                            | ●                                                           | ●                                                               | ●                                            | ●                                            |
| D'Almeida 2019   | ●                                                                  | ●                                                        | ●                             | ●                                                            | ●                                                           | ●                                                               | ●                                            | ●                                            |
| Dikmetas 2011    | ●                                                                  | ●                                                        | ●                             | ●                                                            | ●                                                           | ●                                                               | ●                                            | ●                                            |
| Duru 2018        | ●                                                                  | ●                                                        | ●                             | ●                                                            | ●                                                           | ●                                                               | ●                                            | ●                                            |
| Fighaly 2020     | ●                                                                  | ●                                                        | ●                             | ●                                                            | ●                                                           | ●                                                               | ●                                            | ●                                            |
| Friksen 2011     | ●                                                                  | ●                                                        | ●                             | ●                                                            | ●                                                           | ●                                                               | ●                                            | ●                                            |
| Gallo 2007       | ●                                                                  | ●                                                        | ●                             | ●                                                            | ●                                                           | ●                                                               | ●                                            | ●                                            |
| Gao 2014         | ●                                                                  | ●                                                        | ●                             | ●                                                            | ●                                                           | ●                                                               | ●                                            | ●                                            |
| Hammoud 2020     | ●                                                                  | ●                                                        | ●                             | ●                                                            | ●                                                           | ●                                                               | ●                                            | ●                                            |
| Hu 2019          | ●                                                                  | ●                                                        | ●                             | ●                                                            | ●                                                           | ●                                                               | ●                                            | ●                                            |
| Huber 2020       | ●                                                                  | ●                                                        | ●                             | ●                                                            | ●                                                           | ●                                                               | ●                                            | ●                                            |
| Imran 2010       | ●                                                                  | ●                                                        | ●                             | ●                                                            | ●                                                           | ●                                                               | ●                                            | ●                                            |
| Iqbal 2020       | ●                                                                  | ●                                                        | ●                             | ●                                                            | ●                                                           | ●                                                               | ●                                            | ●                                            |
| Jaggi 2016       | ●                                                                  | ●                                                        | ●                             | ●                                                            | ●                                                           | ●                                                               | ●                                            | ●                                            |
| Kapoor 2016      | ●                                                                  | ●                                                        | ●                             | ●                                                            | ●                                                           | ●                                                               | ●                                            | ●                                            |
| Kemp 2018        | ●                                                                  | ●                                                        | ●                             | ●                                                            | ●                                                           | ●                                                               | ●                                            | ●                                            |
| Kemp 2020        | ●                                                                  | ●                                                        | ●                             | ●                                                            | ●                                                           | ●                                                               | ●                                            | ●                                            |
| Kobayashi 2009   | ●                                                                  | ●                                                        | ●                             | ●                                                            | ●                                                           | ●                                                               | ●                                            | ●                                            |
| Kobayashi 2016   | ●                                                                  | ●                                                        | ●                             | ●                                                            | ●                                                           | ●                                                               | ●                                            | ●                                            |
| Ling 2016        | ●                                                                  | ●                                                        | ●                             | ●                                                            | ●                                                           | ●                                                               | ●                                            | ●                                            |
| Liu 2016         | ●                                                                  | ●                                                        | ●                             | ●                                                            | ●                                                           | ●                                                               | ●                                            | ●                                            |
| Liu 2019         | ●                                                                  | ●                                                        | ●                             | ●                                                            | ●                                                           | ●                                                               | ●                                            | ●                                            |
| Liu 2020         | ●                                                                  | ●                                                        | ●                             | ●                                                            | ●                                                           | ●                                                               | ●                                            | ●                                            |
| Liu 2021         | ●                                                                  | ●                                                        | ●                             | ●                                                            | ●                                                           | ●                                                               | ●                                            | ●                                            |
| Liu 2022         | ●                                                                  | ●                                                        | ●                             | ●                                                            | ●                                                           | ●                                                               | ●                                            | ●                                            |
| Liu 2023         | ●                                                                  | ●                                                        | ●                             | ●                                                            | ●                                                           | ●                                                               | ●                                            | ●                                            |
| Liu 2024         | ●                                                                  | ●                                                        | ●                             | ●                                                            | ●                                                           | ●                                                               | ●                                            | ●                                            |
| Liu 2025         | ●                                                                  | ●                                                        | ●                             | ●                                                            | ●                                                           | ●                                                               | ●                                            | ●                                            |
| Liu 2026         | ●                                                                  | ●                                                        | ●                             | ●                                                            | ●                                                           | ●                                                               | ●                                            | ●                                            |
| Liu 2027         | ●                                                                  | ●                                                        | ●                             | ●                                                            | ●                                                           | ●                                                               | ●                                            | ●                                            |
| Liu 2028         | ●                                                                  | ●                                                        | ●                             | ●                                                            | ●                                                           | ●                                                               | ●                                            | ●                                            |
| Liu 2029         | ●                                                                  | ●                                                        | ●                             | ●                                                            | ●                                                           | ●                                                               | ●                                            | ●                                            |
| Liu 2030         | ●                                                                  | ●                                                        | ●                             | ●                                                            | ●                                                           | ●                                                               | ●                                            | ●                                            |
| Liu 2031         | ●                                                                  | ●                                                        | ●                             | ●                                                            | ●                                                           | ●                                                               | ●                                            | ●                                            |
| Liu 2032         | ●                                                                  | ●                                                        | ●                             | ●                                                            | ●                                                           | ●                                                               | ●                                            | ●                                            |
| Liu 2033         | ●                                                                  | ●                                                        | ●                             | ●                                                            | ●                                                           | ●                                                               | ●                                            | ●                                            |
| Liu 2034         | ●                                                                  | ●                                                        | ●                             | ●                                                            | ●                                                           | ●                                                               | ●                                            | ●                                            |
| Liu 2035         | ●                                                                  | ●                                                        | ●                             | ●                                                            | ●                                                           | ●                                                               | ●                                            | ●                                            |
| Liu 2036         | ●                                                                  | ●                                                        | ●                             | ●                                                            | ●                                                           | ●                                                               | ●                                            | ●                                            |
| Liu 2037         | ●                                                                  | ●                                                        | ●                             | ●                                                            | ●                                                           | ●                                                               | ●                                            | ●                                            |
| Liu 2038         | ●                                                                  | ●                                                        | ●                             | ●                                                            | ●                                                           | ●                                                               | ●                                            | ●                                            |
| Liu 2039         | ●                                                                  | ●                                                        | ●                             | ●                                                            | ●                                                           | ●                                                               | ●                                            | ●                                            |
| Liu 2040         | ●                                                                  | ●                                                        | ●                             | ●                                                            | ●                                                           | ●                                                               | ●                                            | ●                                            |
| Liu 2041         | ●                                                                  | ●                                                        | ●                             | ●                                                            | ●                                                           | ●                                                               | ●                                            | ●                                            |
| Liu 2042         | ●                                                                  | ●                                                        | ●                             | ●                                                            | ●                                                           | ●                                                               | ●                                            | ●                                            |
| Liu 2043         | ●                                                                  | ●                                                        | ●                             | ●                                                            | ●                                                           | ●                                                               | ●                                            | ●                                            |
| Liu 2044         | ●                                                                  | ●                                                        | ●                             | ●                                                            | ●                                                           | ●                                                               | ●                                            | ●                                            |
| Liu 2045         | ●                                                                  | ●                                                        | ●                             | ●                                                            | ●                                                           | ●                                                               | ●                                            | ●                                            |
| Liu 2046         | ●                                                                  | ●                                                        | ●                             | ●                                                            | ●                                                           | ●                                                               | ●                                            | ●                                            |
| Liu 2047         | ●                                                                  | ●                                                        | ●                             | ●                                                            | ●                                                           | ●                                                               | ●                                            | ●                                            |
| Liu 2048         | ●                                                                  | ●                                                        | ●                             | ●                                                            | ●                                                           | ●                                                               | ●                                            | ●                                            |
| Liu 2049         | ●                                                                  | ●                                                        | ●                             | ●                                                            | ●                                                           | ●                                                               | ●                                            | ●                                            |
| Liu 2050         | ●                                                                  | ●                                                        | ●                             | ●                                                            | ●                                                           | ●                                                               | ●                                            | ●                                            |
| Liu 2051         | ●                                                                  | ●                                                        | ●                             | ●                                                            | ●                                                           | ●                                                               | ●                                            | ●                                            |
| Liu 2052         | ●                                                                  | ●                                                        | ●                             | ●                                                            | ●                                                           | ●                                                               | ●                                            | ●                                            |
| Liu 2053         | ●                                                                  | ●                                                        | ●                             | ●                                                            | ●                                                           | ●                                                               | ●                                            | ●                                            |
| Liu 2054         | ●                                                                  | ●                                                        | ●                             | ●                                                            | ●                                                           | ●                                                               | ●                                            | ●                                            |
| Liu 2055         | ●                                                                  | ●                                                        | ●                             | ●                                                            | ●                                                           | ●                                                               | ●                                            | ●                                            |
| Liu 2056         | ●                                                                  | ●                                                        | ●                             | ●                                                            | ●                                                           | ●                                                               | ●                                            | ●                                            |
| Liu 2057         | ●                                                                  | ●                                                        | ●                             | ●                                                            | ●                                                           | ●                                                               | ●                                            | ●                                            |
| Liu 2058         | ●                                                                  | ●                                                        | ●                             | ●                                                            | ●                                                           | ●                                                               | ●                                            | ●                                            |
| Liu 2059         | ●                                                                  | ●                                                        | ●                             | ●                                                            | ●                                                           | ●                                                               | ●                                            | ●                                            |
| Liu 2060         | ●                                                                  | ●                                                        | ●                             | ●                                                            | ●                                                           | ●                                                               | ●                                            | ●                                            |
| Liu 2061         | ●                                                                  | ●                                                        | ●                             | ●                                                            | ●                                                           | ●                                                               | ●                                            | ●                                            |
| Liu 2062         | ●                                                                  | ●                                                        | ●                             | ●                                                            | ●                                                           | ●                                                               | ●                                            | ●                                            |
| Liu 2063         | ●                                                                  | ●                                                        | ●                             | ●                                                            | ●                                                           | ●                                                               | ●                                            | ●                                            |
| Liu 2064         | ●                                                                  | ●                                                        | ●                             | ●                                                            | ●                                                           | ●                                                               | ●                                            | ●                                            |
| Liu 2065         | ●                                                                  | ●                                                        | ●                             | ●                                                            | ●                                                           | ●                                                               | ●                                            | ●                                            |
| Liu 2066         | ●                                                                  | ●                                                        | ●                             | ●                                                            | ●                                                           | ●                                                               | ●                                            | ●                                            |
| Liu 2067         | ●                                                                  | ●                                                        | ●                             | ●                                                            | ●                                                           | ●                                                               | ●                                            | ●                                            |
| Liu 2068         | ●                                                                  | ●                                                        | ●                             | ●                                                            | ●                                                           | ●                                                               | ●                                            | ●                                            |
| Liu 2069         | ●                                                                  | ●                                                        | ●                             | ●                                                            | ●                                                           | ●                                                               | ●                                            | ●                                            |
| Liu 2070         | ●                                                                  | ●                                                        | ●                             | ●                                                            | ●                                                           | ●                                                               | ●                                            | ●                                            |
| Liu 2071         | ●                                                                  | ●                                                        | ●                             | ●                                                            | ●                                                           | ●                                                               | ●                                            | ●                                            |
| Liu 2072         | ●                                                                  | ●                                                        | ●                             | ●                                                            | ●                                                           | ●                                                               | ●                                            | ●                                            |
| Liu 2073         | ●                                                                  | ●                                                        | ●                             | ●                                                            | ●                                                           | ●                                                               | ●                                            | ●                                            |
| Liu 2074         | ●                                                                  | ●                                                        | ●                             | ●                                                            | ●                                                           | ●                                                               | ●                                            | ●                                            |
| Liu 2075         | ●                                                                  | ●                                                        | ●                             | ●                                                            | ●                                                           | ●                                                               | ●                                            | ●                                            |
| Liu 2076         | ●                                                                  | ●                                                        | ●                             | ●                                                            | ●                                                           | ●                                                               | ●                                            | ●                                            |
| Liu 2077         | ●                                                                  | ●                                                        | ●                             | ●                                                            | ●                                                           | ●                                                               | ●                                            | ●                                            |
| Liu 2078         | ●                                                                  | ●                                                        | ●                             | ●                                                            | ●                                                           | ●                                                               | ●                                            | ●                                            |
| Liu 2079         | ●                                                                  | ●                                                        | ●                             | ●                                                            | ●                                                           | ●                                                               | ●                                            | ●                                            |
| Liu 2080         | ●                                                                  | ●                                                        | ●                             | ●                                                            | ●                                                           | ●                                                               | ●                                            | ●                                            |
| Liu 2081         | ●                                                                  | ●                                                        | ●                             | ●                                                            | ●                                                           | ●                                                               | ●                                            | ●                                            |
| Liu 2082         | ●                                                                  | ●                                                        | ●                             | ●                                                            | ●                                                           | ●                                                               | ●                                            | ●                                            |
| Liu 2083         | ●                                                                  | ●                                                        | ●                             | ●                                                            | ●                                                           | ●                                                               | ●                                            | ●                                            |
| Liu 2084         | ●                                                                  | ●                                                        | ●                             | ●                                                            | ●                                                           | ●                                                               | ●                                            | ●                                            |
| Liu 2085         | ●                                                                  | ●                                                        | ●                             | ●                                                            | ●                                                           | ●                                                               | ●                                            | ●                                            |
| Liu 2086         | ●                                                                  | ●                                                        | ●                             | ●                                                            | ●                                                           | ●                                                               | ●                                            | ●                                            |
| Liu 2087         | ●                                                                  | ●                                                        | ●                             | ●                                                            | ●                                                           | ●                                                               | ●                                            | ●                                            |
| Liu 2088         | ●                                                                  | ●                                                        | ●                             | ●                                                            | ●                                                           | ●                                                               | ●                                            | ●                                            |
| Liu 2089         | ●                                                                  | ●                                                        | ●                             | ●                                                            | ●                                                           | ●                                                               | ●                                            | ●                                            |
| Liu 2090         | ●                                                                  | ●                                                        | ●                             | ●                                                            | ●                                                           | ●                                                               | ●                                            | ●                                            |
| Liu 2091         | ●                                                                  | ●                                                        | ●                             | ●                                                            | ●                                                           | ●                                                               | ●                                            | ●                                            |
| Liu 2092         | ●                                                                  | ●                                                        | ●                             | ●                                                            | ●                                                           | ●                                                               | ●                                            | ●                                            |
| Liu 2093         | ●                                                                  | ●                                                        | ●                             | ●                                                            | ●                                                           | ●                                                               | ●                                            | ●                                            |
| Liu 2094         | ●                                                                  | ●                                                        | ●                             | ●                                                            | ●                                                           | ●                                                               | ●                                            | ●                                            |
| Liu 2095         | ●                                                                  | ●                                                        | ●                             | ●                                                            | ●                                                           | ●                                                               | ●                                            | ●                                            |
| Liu 2096         | ●                                                                  | ●                                                        | ●                             | ●                                                            | ●                                                           | ●                                                               | ●                                            | ●                                            |
| Liu 2097         | ●                                                                  | ●                                                        | ●                             | ●                                                            | ●                                                           | ●                                                               | ●                                            | ●                                            |
| Liu 2098         | ●                                                                  | ●                                                        | ●                             | ●                                                            | ●                                                           | ●                                                               | ●                                            | ●                                            |
| Liu 2099         | ●                                                                  | ●                                                        | ●                             | ●                                                            | ●                                                           | ●                                                               | ●                                            | ●                                            |
| Liu 2100         | ●                                                                  | ●                                                        | ●                             | ●                                                            | ●                                                           | ●                                                               | ●                                            | ●                                            |

88x501mm (300 x 300 DPI)

1  
2  
3  
4  
5  
6  
7  
8  
9  
10  
11  
12  
13  
14  
15  
16  
17  
18  
19  
20  
21  
22  
23  
24  
25  
26  
27  
28  
29  
30  
31  
32  
33  
34  
35  
36  
37  
38  
39  
40  
41  
42  
43  
44  
45  
46  
47  
48  
49  
50  
51  
52  
53  
54  
55  
56  
57  
58  
59  
60

|                       | Was the study question or objective clearly stated? | Were eligibility/selection criteria for the study population pre-specified and clearly described? | Were the participants in the study representative of those who would be eligible for the test/service/intervention in the general or clinical population of interest? | Were all eligible participants that met the pre-specified entry criteria enrolled? | Was the sample size sufficiently large to provide confidence in the findings? | Was the test/service/intervention clearly described and delivered consistently across the study population? | Were the outcome measures pre-specified, clearly defined, valid, reliable, and assessed consistently across all study participants? | Were the people assessing the outcomes blinded to the participants' exposures/interventions? | Was the loss to follow-up after baseline 20% or less? Were those lost to follow-up accounted for in the analysis? | Did the statistical methods examine changes in outcome measures from before to after the intervention? Were statistical tests done that provided p values for the pre-to-post changes? | Were outcome measures of interest taken multiple times before the intervention and multiple times after the intervention (i.e., did they use an interrupted time-series design)? | If the intervention was conducted at a group level (e.g., a whole hospital, a community, etc.) did the statistical analysis take into account the use of individual-level data to determine effects at the group level? |
|-----------------------|-----------------------------------------------------|---------------------------------------------------------------------------------------------------|-----------------------------------------------------------------------------------------------------------------------------------------------------------------------|------------------------------------------------------------------------------------|-------------------------------------------------------------------------------|-------------------------------------------------------------------------------------------------------------|-------------------------------------------------------------------------------------------------------------------------------------|----------------------------------------------------------------------------------------------|-------------------------------------------------------------------------------------------------------------------|----------------------------------------------------------------------------------------------------------------------------------------------------------------------------------------|----------------------------------------------------------------------------------------------------------------------------------------------------------------------------------|-------------------------------------------------------------------------------------------------------------------------------------------------------------------------------------------------------------------------|
| Benmore 2018          | ●                                                   | ●                                                                                                 | ●                                                                                                                                                                     | ●                                                                                  | ●                                                                             | ●                                                                                                           | ●                                                                                                                                   | ●                                                                                            | ●                                                                                                                 | ●                                                                                                                                                                                      | ●                                                                                                                                                                                | ●                                                                                                                                                                                                                       |
| Best 2010             | ●                                                   | ●                                                                                                 | ●                                                                                                                                                                     | ●                                                                                  | ●                                                                             | ●                                                                                                           | ●                                                                                                                                   | ●                                                                                            | ●                                                                                                                 | ●                                                                                                                                                                                      | ●                                                                                                                                                                                | ●                                                                                                                                                                                                                       |
| Castillo-Angeles 2019 | ●                                                   | ●                                                                                                 | ●                                                                                                                                                                     | ●                                                                                  | ●                                                                             | ●                                                                                                           | ●                                                                                                                                   | ●                                                                                            | ●                                                                                                                 | ●                                                                                                                                                                                      | ●                                                                                                                                                                                | ●                                                                                                                                                                                                                       |
| Cresswell 2016        | ●                                                   | ●                                                                                                 | ●                                                                                                                                                                     | ●                                                                                  | ●                                                                             | ●                                                                                                           | ●                                                                                                                                   | ●                                                                                            | ●                                                                                                                 | ●                                                                                                                                                                                      | ●                                                                                                                                                                                | ●                                                                                                                                                                                                                       |
| Fried 2015            | ●                                                   | ●                                                                                                 | ●                                                                                                                                                                     | ●                                                                                  | ●                                                                             | ●                                                                                                           | ●                                                                                                                                   | ●                                                                                            | ●                                                                                                                 | ●                                                                                                                                                                                      | ●                                                                                                                                                                                | ●                                                                                                                                                                                                                       |
| House 2018            | ●                                                   | ●                                                                                                 | ●                                                                                                                                                                     | ●                                                                                  | ●                                                                             | ●                                                                                                           | ●                                                                                                                                   | ●                                                                                            | ●                                                                                                                 | ●                                                                                                                                                                                      | ●                                                                                                                                                                                | ●                                                                                                                                                                                                                       |
| Kappy 2019            | ●                                                   | ●                                                                                                 | ●                                                                                                                                                                     | ●                                                                                  | ●                                                                             | ●                                                                                                           | ●                                                                                                                                   | ●                                                                                            | ●                                                                                                                 | ●                                                                                                                                                                                      | ●                                                                                                                                                                                | ●                                                                                                                                                                                                                       |
| Kulaylat 2016         | ●                                                   | ●                                                                                                 | ●                                                                                                                                                                     | ●                                                                                  | ●                                                                             | ●                                                                                                           | ●                                                                                                                                   | ●                                                                                            | ●                                                                                                                 | ●                                                                                                                                                                                      | ●                                                                                                                                                                                | ●                                                                                                                                                                                                                       |
| Lind 2020             | ●                                                   | ●                                                                                                 | ●                                                                                                                                                                     | ●                                                                                  | ●                                                                             | ●                                                                                                           | ●                                                                                                                                   | ●                                                                                            | ●                                                                                                                 | ●                                                                                                                                                                                      | ●                                                                                                                                                                                | ●                                                                                                                                                                                                                       |
| Meloni 2011           | ●                                                   | ●                                                                                                 | ●                                                                                                                                                                     | ●                                                                                  | ●                                                                             | ●                                                                                                           | ●                                                                                                                                   | ●                                                                                            | ●                                                                                                                 | ●                                                                                                                                                                                      | ●                                                                                                                                                                                | ●                                                                                                                                                                                                                       |

88x279mm (300 x 300 DPI)



# PRISMA 2009 Checklist

| Section/topic                      | #  | Checklist item                                                                                                                                                                                                                                                                                              | Reported on page # |
|------------------------------------|----|-------------------------------------------------------------------------------------------------------------------------------------------------------------------------------------------------------------------------------------------------------------------------------------------------------------|--------------------|
| <b>TITLE</b>                       |    |                                                                                                                                                                                                                                                                                                             |                    |
| Title                              | 1  | Identify the report as a systematic review, meta-analysis, or both.                                                                                                                                                                                                                                         | 1                  |
| <b>ABSTRACT</b>                    |    |                                                                                                                                                                                                                                                                                                             |                    |
| Structured summary                 | 2  | Provide a structured summary including, as applicable: background; objectives; data sources; study eligibility criteria, participants, and interventions; study appraisal and synthesis methods; results; limitations; conclusions and implications of key findings; systematic review registration number. | 2                  |
| <b>INTRODUCTION</b>                |    |                                                                                                                                                                                                                                                                                                             |                    |
| Rationale                          | 3  | Describe the rationale for the review in the context of what is already known.                                                                                                                                                                                                                              | 4                  |
| Objectives                         | 4  | Provide an explicit statement of questions being addressed with reference to participants, interventions, comparisons, outcomes, and study design (PICOS).                                                                                                                                                  | 5                  |
| <b>METHODS</b>                     |    |                                                                                                                                                                                                                                                                                                             |                    |
| Protocol and registration          | 5  | Indicate if a review protocol exists, if and where it can be accessed (e.g., Web address), and, if available, provide registration information including registration number.                                                                                                                               | n/a                |
| Eligibility criteria               | 6  | Specify study characteristics (e.g., PICOS, length of follow-up) and report characteristics (e.g., years considered, language, publication status) used as criteria for eligibility, giving rationale.                                                                                                      | 6                  |
| Information sources                | 7  | Describe all information sources (e.g., databases with dates of coverage, contact with study authors to identify additional studies) in the search and date last searched.                                                                                                                                  | 5                  |
| Search                             | 8  | Present full electronic search strategy for at least one database, including any limits used, such that it could be repeated.                                                                                                                                                                               | 5                  |
| Study selection                    | 9  | State the process for selecting studies (i.e., screening, eligibility, included in systematic review, and, if applicable, included in the meta-analysis).                                                                                                                                                   | 6                  |
| Data collection process            | 10 | Describe method of data extraction from reports (e.g., piloted forms, independently, in duplicate) and any processes for obtaining and confirming data from investigators.                                                                                                                                  | 6                  |
| Data items                         | 11 | List and define all variables for which data were sought (e.g., PICOS, funding sources) and any assumptions and simplifications made.                                                                                                                                                                       | 6                  |
| Risk of bias in individual studies | 12 | Describe methods used for assessing risk of bias of individual studies (including specification of whether this was done at the study or outcome level), and how this information is to be used in any data synthesis.                                                                                      | 6                  |
| Summary measures                   | 13 | State the principal summary measures (e.g., risk ratio, difference in means).                                                                                                                                                                                                                               | 7                  |
| Synthesis of results               | 14 | Describe the methods of handling data and combining results of studies, if done, including measures of consistency (e.g., $I^2$ ) for each meta-analysis.                                                                                                                                                   | n/a                |



# PRISMA 2009 Checklist

Page 1 of 2

| Section/topic                 | #  | Checklist item                                                                                                                                                                                           | Reported on page # |
|-------------------------------|----|----------------------------------------------------------------------------------------------------------------------------------------------------------------------------------------------------------|--------------------|
| Risk of bias across studies   | 15 | Specify any assessment of risk of bias that may affect the cumulative evidence (e.g., publication bias, selective reporting within studies).                                                             | 7                  |
| Additional analyses           | 16 | Describe methods of additional analyses (e.g., sensitivity or subgroup analyses, meta-regression), if done, indicating which were pre-specified.                                                         | n/a                |
| <b>RESULTS</b>                |    |                                                                                                                                                                                                          |                    |
| Study selection               | 17 | Give numbers of studies screened, assessed for eligibility, and included in the review, with reasons for exclusions at each stage, ideally with a flow diagram.                                          | 8                  |
| Study characteristics         | 18 | For each study, present characteristics for which data were extracted (e.g., study size, PICOS, follow-up period) and provide the citations.                                                             | 8                  |
| Risk of bias within studies   | 19 | Present data on risk of bias of each study and, if available, any outcome level assessment (see item 12).                                                                                                | 16                 |
| Results of individual studies | 20 | For all outcomes considered (benefits or harms), present, for each study: (a) simple summary data for each intervention group (b) effect estimates and confidence intervals, ideally with a forest plot. | 8-15               |
| Synthesis of results          | 21 | Present results of each meta-analysis done, including confidence intervals and measures of consistency.                                                                                                  | N/A                |
| Risk of bias across studies   | 22 | Present results of any assessment of risk of bias across studies (see Item 15).                                                                                                                          | 16                 |
| Additional analysis           | 23 | Give results of additional analyses, if done (e.g., sensitivity or subgroup analyses, meta-regression [see Item 16]).                                                                                    | n/a                |
| <b>DISCUSSION</b>             |    |                                                                                                                                                                                                          |                    |
| Summary of evidence           | 24 | Summarize the main findings including the strength of evidence for each main outcome; consider their relevance to key groups (e.g., healthcare providers, users, and policy makers).                     | 16-20              |
| Limitations                   | 25 | Discuss limitations at study and outcome level (e.g., risk of bias), and at review-level (e.g., incomplete retrieval of identified research, reporting bias).                                            | 20-21              |
| Conclusions                   | 26 | Provide a general interpretation of the results in the context of other evidence, and implications for future research.                                                                                  | 22                 |
| <b>FUNDING</b>                |    |                                                                                                                                                                                                          |                    |
| Funding                       | 27 | Describe sources of funding for the systematic review and other support (e.g., supply of data); role of funders for the systematic review.                                                               | 23                 |

From: Moher D, Liberati A, Tetzlaff J, Altman DG, The PRISMA Group (2009). Preferred Reporting Items for Systematic Reviews and Meta-Analyses: The PRISMA Statement. PLoS Med 6(7): e1000097. doi:10.1371/journal.pmed1000097

For more information, visit: [www.prisma-statement.org](http://www.prisma-statement.org).

Page 2 of 2

For peer review only - <http://bmjopen.bmj.com/site/about/guidelines.xhtml>
