# Supplementary material for: Systematic review of academic bullying in medical settings: dynamics and consequences
Source: PubMed Central journal article supplement — BMJ Open. 2021 Jul 12;11(7):e043256. doi: 10.1136/bmjopen-2020-043256 (PMC8311313; doi:10.1136/bmjopen-2020-043256), 2021-07-12
Supplement: bmjopen-2020-043256supp001.pdf [file bmjopen-2020-043256supp001.pdf]

**Supplementary figure S1: Search strategy**

1. Exp bullying
2. Exp medicine
3. Exp hospitals
4. (sabotage or mistreat\* or discredit or humiliation or harassment or demean or bully\* or belittle or intimidate or disrespect or coerce or ignore or undermine or exclude or libel or slander or criticism or overwork\*).ti
5. (Workplace or career or professional or academic or promotion\* or employment or job or profession or reputation or academia).mp
6. (medicine or residency\* or "medical school" or "clinical training" or hospital or internship or fellow\* or "junior doctor" or "house officer" or "clinical clerk" or "attending physician" or physician or doctor or clinician or hierarchical system or "clinician-scientist" or learner or faculty or "NHS").ti,ab.
7. Exp aggression
8. 1 or 4 or 7
9. 5 and 8
10. 2 or 3 or 6
11. 9 and 10
