# Supplementary material for: Systematic review of academic bullying in medical settings: dynamics and consequences
Source: PubMed Central journal article supplement — BMJ Open. 2021 Jul 12;11(7):e043256. doi: 10.1136/bmjopen-2020-043256 (PMC8311313; doi:10.1136/bmjopen-2020-043256), 2021-07-12
Supplement: bmjopen-2020-043256supp002.pdf [file bmjopen-2020-043256supp002.pdf]

**Supplementary table S1: Pooled prevalence of specific bullying behaviours by level of training**

| <b>Behaviour</b>                                        | <b>No. of studies/<br/>Total studies*</b> | <b>Medical Students<br/>No. of participants/<br/>total participants<br/>(%) *</b> | <b>Residents and<br/>fellows<br/>No. of participants/<br/>total participants<br/>(%)*</b> | <b>Consultants<br/>No. of participants/<br/>total participants<br/>(%)*</b> |
|---------------------------------------------------------|-------------------------------------------|-----------------------------------------------------------------------------------|-------------------------------------------------------------------------------------------|-----------------------------------------------------------------------------|
| <b>Threats to professional status</b>                   |                                           |                                                                                   |                                                                                           |                                                                             |
| Persistent unjustified criticism                        | 10/24                                     | 200/301 (66.4)                                                                    | 3596/12708 (28.3)                                                                         | 600/2881 (20.8)                                                             |
| Excessive monitoring of work                            | 4/24                                      | Not reported                                                                      | 1020/2445 (41.7)                                                                          | 564/2824 (20.0)                                                             |
| Intimidatory use of discipline                          | 14/24                                     | 641/13914 (4.6)                                                                   | 640/3594 (17.8)                                                                           | 38/1112 (3.4)                                                               |
| Spread of gossip/rumours                                | 5/24                                      | Not reported                                                                      | 2085/6366 (32.8)                                                                          | 755/2881 (26.2)                                                             |
| False allegations                                       | 4/24                                      | Not reported                                                                      | 36/102 (35.3)                                                                             | 509/2881 (17.7)                                                             |
| Refusal of leave, training or promotion                 | 8/24                                      | 74/551 (13.4)                                                                     | 379/3441 (11.0)                                                                           | 894/3403 (26.3)                                                             |
| <b>Isolation</b>                                        |                                           |                                                                                   |                                                                                           |                                                                             |
| Social/professional exclusion                           | 16/24                                     | 418/1546 (27.0)                                                                   | 3687/12385 (29.8)                                                                         | 1272/4445 (28.6)                                                            |
| <b>Overwork</b>                                         |                                           |                                                                                   |                                                                                           |                                                                             |
| Undue pressure to produce work                          | 7/24                                      | Not reported                                                                      | 827/2928 (28.2)                                                                           | 1326/2824 (47.0)                                                            |
| Setting impossible deadlines                            | 6/24                                      | Not reported                                                                      | 351/2445 (14.4)                                                                           | 965/2824 (34.2)                                                             |
| <b>Destabilization</b>                                  |                                           |                                                                                   |                                                                                           |                                                                             |
| Shifting goalposts                                      | 1/24                                      | Not reported                                                                      | 54/654 (8.3)                                                                              | Not reported                                                                |
| Removal of areas of responsibility without consultation | 6/24                                      | 11/56 (19.6)                                                                      | 267/2503 (10.7)                                                                           | 784/2824 (27.8)                                                             |

|                                                  |      |                |                  |                  |
|--------------------------------------------------|------|----------------|------------------|------------------|
| Withholding information that affects performance | 7/24 | Not reported   | 2465/8869 (27.8) | 1140/2824 (40.4) |
| Ordered to work below one's competence level     | 7/24 | 182/269 (67.7) | 1276/3676 (34.7) | 975/2881 (33.8)  |

---

\*Total number of studies that described types of bullying behaviours that separated data by level of training

**Supplementary table S2: The pooled impact of academic bullying by level of training**

| <b>Effect of academic bullying</b>                      | <b>No. of studies/<br/>Total studies*</b> | <b>Medical Students<br/>No. of participants/<br/>total participants<br/>(%) *</b> | <b>Residents and<br/>fellows<br/>No. of participants/<br/>total participants<br/>(%) *</b> | <b>Consultants<br/>No. of participants/<br/>total participants<br/>(%) *</b> |
|---------------------------------------------------------|-------------------------------------------|-----------------------------------------------------------------------------------|--------------------------------------------------------------------------------------------|------------------------------------------------------------------------------|
| <b>Psychiatric</b>                                      |                                           |                                                                                   |                                                                                            |                                                                              |
| Psychiatric distress including depressive/PTSD symptoms | 12/28                                     | 422/579 (72.9)                                                                    | 2142/5256 (40.8)                                                                           | 178/996 (17.9)                                                               |
| Reduced confidence in clinical skill                    | 4/28                                      | 119/262 (45.4)                                                                    | Not reported                                                                               | 177/1259 (14.1)                                                              |
| <b>Career</b>                                           |                                           |                                                                                   |                                                                                            |                                                                              |
| Missed career opportunities                             | 14/28                                     | 484/3020 (16.0)                                                                   | 149/426 (35.0)                                                                             | 1789/5854 (30.6)                                                             |
| Considered quitting                                     | 9/28                                      | 109/317 (34.4)                                                                    | 5/100 (5.0)                                                                                | 908/2375 (38.2)                                                              |
| Terminated employment                                   | 4/28                                      | Not reported                                                                      | 135/3574 (3.8)                                                                             | 11/348 (3.2)                                                                 |
| Leave of absence                                        | 2/28                                      | Not reported                                                                      | Not reported                                                                               | 50/748 (6.7)                                                                 |
| Self-reported worsening of clinical performance         | 6/28                                      | 202/579 (34.9)                                                                    | 1168/3179 (36.7)                                                                           | 51/563 (9.1)                                                                 |

\*Total number of studies that described the impact of academic bullying and separated data by level of training

**Supplementary table S3. Suggested policies, interventions and reported outcomes**

| <b>Intervention</b>                        | <b>Outcome</b>                                                                                                                                                                                                                                                                          |
|--------------------------------------------|-----------------------------------------------------------------------------------------------------------------------------------------------------------------------------------------------------------------------------------------------------------------------------------------|
| <b>Zero-tolerance/Anti-bullying policy</b> |                                                                                                                                                                                                                                                                                         |
| (Cheema et al., 2005)<br>*                 | Data not provided                                                                                                                                                                                                                                                                       |
| (Wear et al., 2005) *                      | Data not provided                                                                                                                                                                                                                                                                       |
| (Gadit et al., 2007) *                     | Data not provided                                                                                                                                                                                                                                                                       |
| (Nagata-Kobayashi et al., 2009) *          | Data not provided                                                                                                                                                                                                                                                                       |
| (Imran et al., 2010) *                     | Data not provided                                                                                                                                                                                                                                                                       |
| (Meloni and Austin, 2011)                  | Increased employee engagement and workplace satisfaction<br>Increased trust among victims that reports would be appropriately managed (44% to 64%)<br>Victims felt safer reporting incidents of bullying (67% to 84%)<br>Improved awareness of where and whom to report to (67% to 84%) |
| (Fried et al., 2012)                       | Reduced power abuse (43% to 30%) but no change in overall mistreatment rates                                                                                                                                                                                                            |
| (Askew et al., 2012) *                     | Data not provided                                                                                                                                                                                                                                                                       |
| (Mavis et al., 2014) *                     | Data not provided                                                                                                                                                                                                                                                                       |
| (Chadaga et al., 2016)<br>*                | Data not provided                                                                                                                                                                                                                                                                       |
| (Kapoor et al., 2016) *                    | Data not provided                                                                                                                                                                                                                                                                       |
| (Peres et al., 2016) *                     | Data not provided                                                                                                                                                                                                                                                                       |
| (Wolfman et al., 2019)<br>*                | Data not provided                                                                                                                                                                                                                                                                       |
| <b>Bullying workshops</b>                  |                                                                                                                                                                                                                                                                                         |
| (Oku et al., 2014) *                       | Data not provided                                                                                                                                                                                                                                                                       |
| (Kulaylat et al., 2016)<br>*               | Data not provided                                                                                                                                                                                                                                                                       |

|                                 |                                                                                                                 |
|---------------------------------|-----------------------------------------------------------------------------------------------------------------|
| (Cresswell et al., 2016) *      | Data not provided                                                                                               |
| (Benmore et al., 2018)          | Increased willingness to try to repair the harm caused by bullying and became more conscious of giving feedback |
| (Castillo-Angeles et al., 2019) | Bullying behaviour persisted                                                                                    |
| (Colenbrander et al., 2020) *   | Data not provided                                                                                               |
| (Stasenko et al., 2020) *       | Data not provided                                                                                               |

#### **Tracking and reporting mistreatment data**

|                             |                                                                                                                           |
|-----------------------------|---------------------------------------------------------------------------------------------------------------------------|
| (Gan and Snell, 2014)       | No difference in mistreatment                                                                                             |
| (Mavis et al., 2014) *      | Data not provided                                                                                                         |
| (House et al., 2018)        | Decreased unprofessional or disrespectful behaviour by faculty as reported by students [4.8% (2015-16) to 1.7% (2016-17)] |
| (Elghazally et al., 2020) * | Data not provided                                                                                                         |
| (Hammoud et al., 2020) *    | Data not provided                                                                                                         |

#### **Staff education on bullying and the reporting process**

|                         |                             |
|-------------------------|-----------------------------|
| (Cheema et al., 2005) * | Data not provided           |
| (Wear et al., 2005) *   | Data not provided           |
| (Gadit et al., 2007) *  | Data not provided           |
| (Scott et al., 2008) *  | Data not provided           |
| (Imran et al., 2010) *  | Data not provided           |
| (Fried et al., 2012)    | No change in reporting rate |
| (Al-Shafae, 2013) *     | Data not provided           |
| (Mavis et al., 2014) *  | Data not provided           |
| (Oku et al., 2014) *    | Data not provided           |

|                                                            |                                           |
|------------------------------------------------------------|-------------------------------------------|
| (Crebbin et al., 2015)<br>*                                | Data not provided                         |
| (Chadaga et al., 2016)<br>*                                | Data not provided                         |
| (Peres et al., 2016) *                                     | Data not provided                         |
| (Chung et al., 2018) *                                     | Data not provided                         |
| (D'Agostino et al.,<br>2019) *                             | Data not provided                         |
| (Chowdhury et al.,<br>2019) *                              | Data not provided                         |
| (Zurayk et al. 2019) *                                     | Data not provided                         |
| (Colenbrander et al.,<br>2020) *                           | Data not provided                         |
| (Elghazally et al.,<br>2020) *                             | Data not provided                         |
| (Lind et al. 2020)                                         | Multiple effect**                         |
| (Brown et al., 2020) *                                     | Data not provided                         |
| <b>Develop a committee to handle and support reporting</b> |                                           |
| (Gadit et al., 2007) *                                     | Data not provided                         |
| (Best et al., 2010)                                        | Resolutions reached 96% of formal reports |
| (Kapoor et al., 2016) *                                    | Data not provided                         |
| (Kemp et al., 2018) *                                      | Data not provided                         |
| (Kappy et al., 2019)                                       | Fewer comments on mistreatment            |
| (Ayyala et al., 2019) *                                    | Data not provided                         |
| (Brown et al., 2019) *                                     | Data not provided                         |
| (Lind et al. 2020)                                         | Multiple effects**                        |
| (Samora et al., 2020) *                                    | Data not provided                         |
| (Hammoud et al.,<br>2020) *                                | Data not provided                         |

### **Accessible and confidential reporting**

|                               |                                                                              |
|-------------------------------|------------------------------------------------------------------------------|
| (Imran et al., 2010) *        | Data not provided                                                            |
| (Fried et al., 2012)          | Reduced power abuse (43% to 30%) but no change in overall mistreatment rates |
| (Askew et al., 2012) *        | Data not provided                                                            |
| (Al-Shafae, 2013) *           | Data not provided                                                            |
| (Crebbin et al., 2015) *      | Data not provided                                                            |
| (Mavis et al., 2014) *        | Data not provided                                                            |
| (Colenbrander et al., 2020) * | Data not provided                                                            |
| (Brown et al. 2019) *         | Data not provided                                                            |
| (Samora et al., 2020) *       | Data not provided                                                            |

---

\*Suggested approach that had not been implemented

\*\* In this study, a substantial decrease in mistreatment (from 62.9% to 40.3%), fear of reporting (from 42.2% to 37.1%), fear of reprisal (from 28.9% to 22.6%), and an increase in knowledge of reporting increased (from 88.8% to 94.2%) was observed.
