# Supplementary material for: Systematic review of academic bullying in medical settings: dynamics and consequences
Source: PubMed Central journal article supplement — BMJ Open. 2021 Jul 12;11(7):e043256. doi: 10.1136/bmjopen-2020-043256 (PMC8311313; doi:10.1136/bmjopen-2020-043256), 2021-07-12
Supplement: bmjopen-2020-043256supp003.pdf [file bmjopen-2020-043256supp003.pdf]

|                    | Was the sample frame appropriate to address the target population? | Were study participants sampled in an appropriate way? | Was the sample size adequate? | Were the study subjects and the setting described in detail? | Was the data analysis conducted with sufficient coverage of the identified sample? | Were valid methods used for the identification of the condition? | Was the condition measured in a standard, reliable way for all participants? | Was there appropriate statistical analysis? | Was the response rate adequate, and if not, was the low response rate managed appropriately? |
|--------------------|--------------------------------------------------------------------|--------------------------------------------------------|-------------------------------|--------------------------------------------------------------|------------------------------------------------------------------------------------|------------------------------------------------------------------|------------------------------------------------------------------------------|---------------------------------------------|----------------------------------------------------------------------------------------------|
| Afsharzadeh 2019   | +                                                                  | +                                                      | +                             | +                                                            | +                                                                                  | +                                                                | +                                                                            | +                                           | +                                                                                            |
| Ahmadpour 2016     | +                                                                  | +                                                      | -                             | +                                                            | +                                                                                  | +                                                                | +                                                                            | +                                           |                                                                                              |
| Al-Shafae 2013     | +                                                                  | -                                                      | -                             | -                                                            | -                                                                                  | +                                                                | +                                                                            | +                                           | +                                                                                            |
| Askew 2012         | +                                                                  | +                                                      | +                             | +                                                            | +                                                                                  | +                                                                | +                                                                            | +                                           | -                                                                                            |
| Ayyala 2019        | +                                                                  | +                                                      | +                             | +                                                            | +                                                                                  | -                                                                | +                                                                            | +                                           | +                                                                                            |
| Bernotat 2017      | +                                                                  | -                                                      | -                             | +                                                            | -                                                                                  | +                                                                | +                                                                            | +                                           | +                                                                                            |
| Brown 2019         | +                                                                  | +                                                      | +                             | +                                                            | +                                                                                  | -                                                                | +                                                                            | +                                           | -                                                                                            |
| Brown 2020         | +                                                                  | +                                                      | -                             | +                                                            | -                                                                                  | -                                                                | +                                                                            | +                                           | -                                                                                            |
| Carr 2000          | +                                                                  | +                                                      | +                             | +                                                            | +                                                                                  | +                                                                | +                                                                            | +                                           | +                                                                                            |
| Chadaga 2016       | +                                                                  | -                                                      | +                             | +                                                            | -                                                                                  | +                                                                | +                                                                            | +                                           | -                                                                                            |
| Chambers 2018      | +                                                                  | +                                                      | +                             | +                                                            | +                                                                                  | +                                                                | +                                                                            | +                                           | -                                                                                            |
| Cheema 2005        | +                                                                  | +                                                      | +                             | +                                                            | +                                                                                  | +                                                                | +                                                                            | +                                           | -                                                                                            |
| Chowdhury 2019     | +                                                                  | +                                                      | -                             | -                                                            | +                                                                                  | +                                                                | +                                                                            | +                                           | -                                                                                            |
| Chrysafti 2017     | +                                                                  | +                                                      | +                             | +                                                            | +                                                                                  | -                                                                | +                                                                            | +                                           | -                                                                                            |
| Chung 2018         | +                                                                  | -                                                      | +                             | +                                                            | +                                                                                  | -                                                                | +                                                                            | +                                           | +                                                                                            |
| Colenbrander 2020  | +                                                                  | +                                                      | -                             | +                                                            | -                                                                                  |                                                                  | -                                                                            | -                                           |                                                                                              |
| Crebbin 2015       | +                                                                  | +                                                      | +                             | +                                                            | +                                                                                  | +                                                                | +                                                                            | +                                           | -                                                                                            |
| D'Agostino 2019    | +                                                                  | +                                                      | +                             | +                                                            | +                                                                                  | -                                                                | +                                                                            | -                                           | -                                                                                            |
| Dikmetas 2011      | +                                                                  | +                                                      | +                             | +                                                            | +                                                                                  | +                                                                | +                                                                            | +                                           | -                                                                                            |
| Duru 2018          | +                                                                  | -                                                      | -                             | +                                                            | +                                                                                  | +                                                                | +                                                                            | +                                           | +                                                                                            |
| Elghazally 2020    | +                                                                  | +                                                      | +                             | +                                                            | +                                                                                  | +                                                                | +                                                                            | +                                           | +                                                                                            |
| Eriksen 2011       | +                                                                  | -                                                      | +                             | +                                                            | +                                                                                  | +                                                                | +                                                                            | -                                           | -                                                                                            |
| Gadit 2007         | +                                                                  | +                                                      | -                             | +                                                            | +                                                                                  | +                                                                | +                                                                            | +                                           | +                                                                                            |
| Gan 2014           | +                                                                  | -                                                      | -                             | +                                                            | +                                                                                  | -                                                                | +                                                                            | +                                           | -                                                                                            |
| Hammoud 2020       | +                                                                  | +                                                      | +                             | +                                                            | +                                                                                  | +                                                                | +                                                                            | +                                           | -                                                                                            |
| Hu 2019            | +                                                                  | +                                                      | +                             | +                                                            | +                                                                                  | +                                                                | +                                                                            | +                                           | +                                                                                            |
| Huber 2020         | +                                                                  | +                                                      | -                             | +                                                            | +                                                                                  | +                                                                | +                                                                            | +                                           | +                                                                                            |
| Imran 2010         | +                                                                  | -                                                      | +                             | +                                                            | -                                                                                  | -                                                                | +                                                                            | +                                           | +                                                                                            |
| Iqbal 2020         | +                                                                  | +                                                      | -                             | +                                                            | +                                                                                  | +                                                                | +                                                                            | -                                           | +                                                                                            |
| Jagsi 2016         | -                                                                  | +                                                      | +                             | +                                                            | +                                                                                  | -                                                                | +                                                                            | +                                           | +                                                                                            |
| Kapoor 2016        | +                                                                  | -                                                      | +                             | -                                                            | +                                                                                  | +                                                                | +                                                                            | +                                           | +                                                                                            |
| Kemp 2018          | +                                                                  | +                                                      | +                             | +                                                            | +                                                                                  | +                                                                | +                                                                            | -                                           | -                                                                                            |
| Kemper 2020        | +                                                                  | +                                                      | +                             | +                                                            | +                                                                                  | +                                                                | +                                                                            | +                                           | +                                                                                            |
| Kobayashi 2009     | +                                                                  | +                                                      | +                             | +                                                            | +                                                                                  | +                                                                | +                                                                            | +                                           | -                                                                                            |
| Kulaylat 2016      | +                                                                  | -                                                      | -                             | +                                                            | +                                                                                  | -                                                                | -                                                                            | +                                           | -                                                                                            |
| Ling 2016          | +                                                                  | +                                                      | +                             | +                                                            | +                                                                                  | +                                                                | +                                                                            | +                                           | -                                                                                            |
| Llewellyn 2016     | +                                                                  | -                                                      | +                             | +                                                            | -                                                                                  | -                                                                | +                                                                            | +                                           | -                                                                                            |
| Loerboks 2015      | +                                                                  | +                                                      | +                             | +                                                            | +                                                                                  | +                                                                | +                                                                            | +                                           | +                                                                                            |
| Maulnauskienė 2014 | +                                                                  | +                                                      | +                             | +                                                            | +                                                                                  | +                                                                | +                                                                            | +                                           | +                                                                                            |
| Mavis 2014         | +                                                                  | +                                                      | +                             | -                                                            | +                                                                                  | +                                                                | +                                                                            | -                                           | -                                                                                            |
| Ogunsemi 2010      | +                                                                  | +                                                      | -                             | +                                                            | +                                                                                  | +                                                                | +                                                                            | +                                           | +                                                                                            |
| Oku 2014           | +                                                                  | +                                                      | +                             | +                                                            | +                                                                                  | +                                                                | +                                                                            | +                                           | +                                                                                            |
| Oser 2014          | +                                                                  | +                                                      | +                             | +                                                            | +                                                                                  | +                                                                | +                                                                            | +                                           | +                                                                                            |
| Owoaje 2012        | +                                                                  | +                                                      | +                             | +                                                            | +                                                                                  | +                                                                | +                                                                            | +                                           | -                                                                                            |
| Peres 2016         | +                                                                  | +                                                      | +                             | +                                                            | +                                                                                  | -                                                                | +                                                                            | +                                           | -                                                                                            |
| Quine 1999         | +                                                                  | +                                                      | +                             | +                                                            | +                                                                                  | +                                                                | +                                                                            | +                                           | +                                                                                            |
| Raj 2020           | +                                                                  | +                                                      | +                             | +                                                            | +                                                                                  | +                                                                | +                                                                            | +                                           | +                                                                                            |
| Rautio 2005        | +                                                                  | -                                                      | -                             | +                                                            | -                                                                                  | +                                                                | +                                                                            | +                                           | -                                                                                            |
| Rouse 2016         | +                                                                  | +                                                      | +                             | +                                                            | +                                                                                  | +                                                                | +                                                                            | +                                           | -                                                                                            |
| Samora 2020        | +                                                                  | +                                                      | +                             | +                                                            | +                                                                                  | +                                                                | +                                                                            | -                                           | -                                                                                            |
| Scott 2008         | +                                                                  | +                                                      | -                             | -                                                            | +                                                                                  | +                                                                | +                                                                            | +                                           | -                                                                                            |
| Shabazz 2016       | +                                                                  | +                                                      | +                             | +                                                            | +                                                                                  | -                                                                | +                                                                            | +                                           | -                                                                                            |
| Shrier 2007        | +                                                                  | -                                                      | -                             | +                                                            | -                                                                                  | +                                                                | +                                                                            | +                                           |                                                                                              |
| Stasenka 2020      | +                                                                  | +                                                      | +                             | +                                                            | +                                                                                  | +                                                                | +                                                                            | +                                           | -                                                                                            |
| Wear 2005          | +                                                                  | -                                                      | -                             | -                                                            | +                                                                                  | -                                                                | -                                                                            | -                                           | -                                                                                            |
| Wolfman 2019       | -                                                                  | +                                                      | +                             | +                                                            | +                                                                                  | -                                                                | +                                                                            | +                                           | -                                                                                            |
| Zhang 2020         | +                                                                  | +                                                      | +                             | -                                                            | +                                                                                  | +                                                                | +                                                                            | +                                           | +                                                                                            |
| Zurayk 2019        | -                                                                  | +                                                      | -                             | +                                                            | +                                                                                  | +                                                                | +                                                                            | +                                           | +                                                                                            |
