# Supplementary material for: Systematic review of academic bullying in medical settings: dynamics and consequences
Source: HighWire-hosted journal article supplement (doi:10.1136/bmjopen-2020-043256), 2021-07-01
Supplement: bmjopen-2020-043256supp004_data_supplement.pdf [file bmjopen-2020-043256supp004_data_supplement.pdf]

|                       | Was the study question or objective clearly stated? | Were eligibility/selection criteria for the study population pre-specified and clearly described? | Were the participants in the study representative of those who would be eligible for the test/service/intervention in the general or clinical population of interest? | Were all eligible participants that met the pre-specified entry criteria enrolled? | Was the sample size sufficiently large to provide confidence in the findings? | Was the test/service/intervention clearly described and delivered consistently across the study population? | Were the outcome measures pre-specified, clearly defined, valid, reliable, and assessed consistently across all study participants? | Were the people assessing the outcomes blinded to the participants' exposures/interventions? | Was the loss to follow-up after baseline 20% or less? Were those lost to follow-up accounted for in the analysis? | Did the statistical methods examine changes in outcome measures from before to after the intervention? Were statistical tests done that provided p values for the pre-to-post changes? | Were outcome measures of interest taken multiple times before the intervention and multiple times after the intervention (i.e., did they use an interrupted time-series design)? | If the intervention was conducted at a group level (e.g., a whole hospital, a community, etc.) did the statistical analysis take into account the use of individual-level data to determine effects at the group level? |
|-----------------------|-----------------------------------------------------|---------------------------------------------------------------------------------------------------|-----------------------------------------------------------------------------------------------------------------------------------------------------------------------|------------------------------------------------------------------------------------|-------------------------------------------------------------------------------|-------------------------------------------------------------------------------------------------------------|-------------------------------------------------------------------------------------------------------------------------------------|----------------------------------------------------------------------------------------------|-------------------------------------------------------------------------------------------------------------------|----------------------------------------------------------------------------------------------------------------------------------------------------------------------------------------|----------------------------------------------------------------------------------------------------------------------------------------------------------------------------------|-------------------------------------------------------------------------------------------------------------------------------------------------------------------------------------------------------------------------|
| Benmore 2018          | +                                                   | +                                                                                                 | +                                                                                                                                                                     | -                                                                                  | -                                                                             | +                                                                                                           | +                                                                                                                                   | -                                                                                            | -                                                                                                                 | -                                                                                                                                                                                      | -                                                                                                                                                                                | +                                                                                                                                                                                                                       |
| Best 2010             | -                                                   | +                                                                                                 | +                                                                                                                                                                     | -                                                                                  | +                                                                             | +                                                                                                           | +                                                                                                                                   | -                                                                                            | +                                                                                                                 | -                                                                                                                                                                                      | -                                                                                                                                                                                | -                                                                                                                                                                                                                       |
| Castillo-Angelès 2019 | +                                                   | +                                                                                                 | +                                                                                                                                                                     | +                                                                                  | -                                                                             | +                                                                                                           | +                                                                                                                                   | -                                                                                            | -                                                                                                                 | +                                                                                                                                                                                      | +                                                                                                                                                                                |                                                                                                                                                                                                                         |
| Cresswell 2016        | -                                                   | -                                                                                                 | +                                                                                                                                                                     | -                                                                                  | -                                                                             | +                                                                                                           | -                                                                                                                                   | -                                                                                            | -                                                                                                                 | -                                                                                                                                                                                      | -                                                                                                                                                                                | +                                                                                                                                                                                                                       |
| Fried 2015            | +                                                   | +                                                                                                 | +                                                                                                                                                                     | +                                                                                  | +                                                                             | +                                                                                                           | +                                                                                                                                   | -                                                                                            | +                                                                                                                 | +                                                                                                                                                                                      | -                                                                                                                                                                                | +                                                                                                                                                                                                                       |
| House 2018            | +                                                   | +                                                                                                 | +                                                                                                                                                                     | -                                                                                  | -                                                                             | +                                                                                                           | -                                                                                                                                   | -                                                                                            | +                                                                                                                 | -                                                                                                                                                                                      | -                                                                                                                                                                                | -                                                                                                                                                                                                                       |
| Kappy 2019            | +                                                   | +                                                                                                 | +                                                                                                                                                                     | +                                                                                  | +                                                                             | -                                                                                                           | -                                                                                                                                   | +                                                                                            | +                                                                                                                 | +                                                                                                                                                                                      | +                                                                                                                                                                                |                                                                                                                                                                                                                         |
| Kulaylat 2016         | +                                                   | +                                                                                                 | +                                                                                                                                                                     | +                                                                                  | -                                                                             | +                                                                                                           | +                                                                                                                                   | -                                                                                            | +                                                                                                                 | +                                                                                                                                                                                      | -                                                                                                                                                                                | +                                                                                                                                                                                                                       |
| Lind 2020             | +                                                   | +                                                                                                 | +                                                                                                                                                                     | +                                                                                  | +                                                                             | +                                                                                                           | +                                                                                                                                   | -                                                                                            | -                                                                                                                 | -                                                                                                                                                                                      | +                                                                                                                                                                                |                                                                                                                                                                                                                         |
| Meloni 2011           | +                                                   | +                                                                                                 | +                                                                                                                                                                     | +                                                                                  | +                                                                             | +                                                                                                           | +                                                                                                                                   | -                                                                                            | -                                                                                                                 | -                                                                                                                                                                                      | -                                                                                                                                                                                | -                                                                                                                                                                                                                       |
